# Supplementary material for: A conserved RNA degradation complex required for spreading and epigenetic inheritance of heterochromatin
Source: eLife. 2020 Jun 3;9:e54341. doi: 10.7554/eLife.54341 (PMC7269676; doi:10.7554/eLife.54341)
Supplement: Supplementary file 3. — List of proteins identified in purifications of wild-type and Grc3-V70M mutant rixosome complexes using isobaric tandem mass tags (TMT) mass spectrometry. [file elife-54341-supp3.xlsx]

## Sheet: IP5above1peptide
Protein Id	Gene Symbol	Description	Group ID	Number of peptides	Collapsed?	crb3 untagged grc3+	crb3 untagged grc3-V70M	crb3-tap grc3+	crb3-tap grc3-V70M
sp|Q10272|IPI3_SCHPO	crb3	Pre-rRNA-processing protein crb3/ipi3 OS=Schizosaccharomyces pombe (strain 972 / ATCC 24843) GN=crb3 PE=1 SV=1	168	91	C	1374.98	1314.63	9600.14	9691.64
sp|P10989|ACT_SCHPO	act1	Actin OS=Schizosaccharomyces pombe (strain 972 / ATCC 24843) GN=act1 PE=1 SV=1	236	89	C	13558.3	12084.3	3247.09	2944.82
sp|P87243|RIX1_SCHPO	rix1	Pre-rRNA-processing protein rix1 OS=Schizosaccharomyces pombe (strain 972 / ATCC 24843) GN=rix1 PE=1 SV=1	81	81	C	1607.37	1446.01	12761.1	13332.8
sp|Q09794|PYR1_SCHPO	ura1	Protein ura1 OS=Schizosaccharomyces pombe (strain 972 / ATCC 24843) GN=ura1 PE=1 SV=1	155	76	C	5028.84	4971.29	5490.64	5449.95
sp|Q10289|FAS2_SCHPO	fas2	Fatty acid synthase subunit alpha OS=Schizosaccharomyces pombe (strain 972 / ATCC 24843) GN=fas2 PE=1 SV=2	269	70	C	4815.55	4785.74	6399.28	6081.83
sp|P78820|ACAC_SCHPO	cut6	Acetyl-CoA carboxylase OS=Schizosaccharomyces pombe (strain 972 / ATCC 24843) GN=cut6 PE=1 SV=2	214	66	C	4279.18	4079.3	4663.03	4719.68
sp|Q9UUG0|FAS1_SCHPO	fas1	Fatty acid synthase subunit beta OS=Schizosaccharomyces pombe (strain 972 / ATCC 24843) GN=fas1 PE=1 SV=1	238	65	C	4510.44	4443.08	5912.29	5614.66
sp|O94248|MDN1_SCHPO	mdn1	Midasin OS=Schizosaccharomyces pombe (strain 972 / ATCC 24843) GN=mdn1 PE=1 SV=1	243	60	C	1899.28	1781.21	5375.55	5382.29
sp|P50522|EF1A1_SCHPO	tef1a	Elongation factor 1-alpha-A OS=Schizosaccharomyces pombe (strain 972 / ATCC 24843) GN=tef1a PE=1 SV=2	957	57	C	6925.68	5623.88	6150.08	5470.93
sp|O94489|EF3_SCHPO	tef3	Elongation factor 3 OS=Schizosaccharomyces pombe (strain 972 / ATCC 24843) GN=tef3 PE=1 SV=1	247	57	C	5369.07	4446.15	5522.62	5093.29
sp|O14460|EF2_SCHPO	eft201	Elongation factor 2 OS=Schizosaccharomyces pombe (strain 972 / ATCC 24843) GN=eft201 PE=1 SV=2	200	48	C	4706.08	4683.29	4082.27	3816.1
sp|P41887|HSP90_SCHPO	swo1	Heat shock protein 90 homolog OS=Schizosaccharomyces pombe (strain 972 / ATCC 24843) GN=swo1 PE=1 SV=2	315	47	C	1301.17	1139.37	1298.85	1189.16
sp|Q9Y7Z8|MYO1_SCHPO	myo1	Myosin-1 OS=Schizosaccharomyces pombe (strain 972 / ATCC 24843) GN=myo1 PE=1 SV=1	71	44	C	14243.2	11285	1627.15	1453.51
sp|Q10425|EIF3B_SCHPO	SPAC25G10.08	Eukaryotic translation initiation factor 3 subunit B OS=Schizosaccharomyces pombe (strain 972 / ATCC 24843) GN=SPAC25G10.08 PE=1 SV=1	212	44	C	5246.52	4788.75	5318.59	4899.97
sp|O59810|VGL1_SCHPO	vgl1	Vigilin 1 OS=Schizosaccharomyces pombe (strain 972 / ATCC 24843) GN=vgl1 PE=1 SV=2	114	44	C	3422.29	3292.72	4203.89	4146.13
sp|O59855|HSP72_SCHPO	ssa2	Probable heat shock protein ssa2 OS=Schizosaccharomyces pombe (strain 972 / ATCC 24843) GN=ssa2 PE=1 SV=3	343	43	C	2797.22	2374.95	2992.82	2854.1
sp|P05933|CALM_SCHPO	cam1	Calmodulin OS=Schizosaccharomyces pombe (strain 972 / ATCC 24843) GN=cam1 PE=1 SV=1	689	42	C	536.467	344.594	2997.85	3133.54
sp|O13736|SLA1_SCHPO	sla1	Actin cytoskeleton-regulatory complex protein sla1 OS=Schizosaccharomyces pombe (strain 972 / ATCC 24843) GN=sla1 PE=1 SV=1	367	42	C	29108.3	21939.1	3719.92	4352.35
sp|P09627|PMA1_SCHPO	pma1	Plasma membrane ATPase 1 OS=Schizosaccharomyces pombe (strain 972 / ATCC 24843) GN=pma1 PE=1 SV=1	112	40	C	5769.18	4118.94	1628.02	1552.47
sp|O14236|NOG2_SCHPO	nog2	Nucleolar GTP-binding protein 2 OS=Schizosaccharomyces pombe (strain 972 / ATCC 24843) GN=nog2 PE=1 SV=1	16	39	C	1158.4	993.383	7475.42	6988.75
sp|P40372|RL3A_SCHPO	rpl3a	60S ribosomal protein L3-A OS=Schizosaccharomyces pombe (strain 972 / ATCC 24843) GN=rpl3a PE=1 SV=2	252	39	C	2158.56	1968.77	4313.59	4176.74
sp|O59838|HSP7F_SCHPO	pss1	Heat shock protein homolog pss1 OS=Schizosaccharomyces pombe (strain 972 / ATCC 24843) GN=pss1 PE=1 SV=2	135	38	C	2029.26	1765.98	2138.62	2077.68
sp|Q10161|CLH_SCHPO	chc1	Probable clathrin heavy chain OS=Schizosaccharomyces pombe (strain 972 / ATCC 24843) GN=chc1 PE=1 SV=1	94	38	C	12130.3	7667.8	1805.36	1872.47
sp|Q09864|HSP60_SCHPO	hsp60	Heat shock protein 60, mitochondrial OS=Schizosaccharomyces pombe (strain 972 / ATCC 24843) GN=hsp60 PE=1 SV=1	84	37	C	2389.56	2734.25	1678.03	1778.69
sp|P22774|HSP7M_SCHPO	ssp1	Heat shock 70 kDa protein, mitochondrial OS=Schizosaccharomyces pombe (strain 972 / ATCC 24843) GN=ssp1 PE=2 SV=2	29	35	C	3705.8	3320.82	3437.37	3130.62
sp|Q10284|HSP75_SCHPO	sks2	Heat shock protein sks2 OS=Schizosaccharomyces pombe (strain 972 / ATCC 24843) GN=sks2 PE=1 SV=2	115	35	C	3701.6	3685.83	4051.06	4258.98
sp|P35679|RL4A_SCHPO	rpl4a	60S ribosomal protein L4-A OS=Schizosaccharomyces pombe (strain 972 / ATCC 24843) GN=rpl4a PE=1 SV=2	242	33	C	3396.1	3219.59	6720.72	6303.56
sp|O74835|RRP5_SCHPO	rrp5	rRNA biogenesis protein rrp5 OS=Schizosaccharomyces pombe (strain 972 / ATCC 24843) GN=rrp5 PE=1 SV=1	195	33	C	3678.24	3336.11	3218.23	3036.48
sp|P36604|GRP78_SCHPO	bip1	78 kDa glucose-regulated protein homolog OS=Schizosaccharomyces pombe (strain 972 / ATCC 24843) GN=bip1 PE=3 SV=2	343	33	C	2387.84	2508.65	2704.84	2725.45
sp|P52822|RL5A_SCHPO	rpl5a	60S ribosomal protein L5-A OS=Schizosaccharomyces pombe (strain 972 / ATCC 24843) GN=rpl5a PE=1 SV=2	909	33	C	2130.63	2656.99	4975.69	5228.75
sp|Q9UU96|GRC3_SCHPO	grc3	Polynucleotide 5'-hydroxyl-kinase grc3 OS=Schizosaccharomyces pombe (strain 972 / ATCC 24843) GN=grc3 PE=1 SV=1	716	32	C	1089.77	841.257	6359.09	6029.81
sp|Q10475|IF4G_SCHPO	tif471	Eukaryotic translation initiation factor 4 gamma OS=Schizosaccharomyces pombe (strain 972 / ATCC 24843) GN=tif471 PE=1 SV=1	167	32	C	2742.98	2414.44	2839.55	2829.54
sp|O94659|NOG1_SCHPO	nog1	Probable nucleolar GTP-binding protein 1 OS=Schizosaccharomyces pombe (strain 972 / ATCC 24843) GN=nog1 PE=1 SV=2	492	31	C	758.017	667.508	5237.13	4710.45
sp|Q10265|HSP71_SCHPO	ssa1	Probable heat shock protein ssa1 OS=Schizosaccharomyces pombe (strain 972 / ATCC 24843) GN=ssa1 PE=1 SV=2	343	31	C	1767.35	1880.05	2161.48	2011.94
sp|O74791|GRN1_SCHPO	grn1	GTPase grn1 OS=Schizosaccharomyces pombe (strain 972 / ATCC 24843) GN=grn1 PE=1 SV=1	508	31	C	1122.35	1337.01	4541.29	4463.78
sp|O42936|LAS1_SCHPO	las1	Pre-rRNA-processing protein las1 OS=Schizosaccharomyces pombe (strain 972 / ATCC 24843) GN=las1 PE=1 SV=1	400	31	C	644.16	608.663	7491.51	7524.12
sp|O60164|PESC_SCHPO	ppp1	Pescadillo homolog OS=Schizosaccharomyces pombe (strain 972 / ATCC 24843) GN=ppp1 PE=3 SV=1	719	30	C	965.775	762.088	4939.4	4379.18
sp|Q10105|GCN1_SCHPO	gcn1	Translational activator gcn1 OS=Schizosaccharomyces pombe (strain 972 / ATCC 24843) GN=gcn1 PE=3 SV=1	72	30	C	1478.06	1379.62	1802.25	1813.21
sp|Q1K9C2|MET5_SCHPO	sir1	Sulfite reductase [NADPH] subunit beta OS=Schizosaccharomyces pombe (strain 972 / ATCC 24843) GN=sir1 PE=3 SV=1	85	30	C	1542.44	1599.43	1434.71	1591.68
sp|Q10342|SDA1_SCHPO	sda1	Protein sda1 OS=Schizosaccharomyces pombe (strain 972 / ATCC 24843) GN=sda1 PE=3 SV=2	237	29	C	750.734	568.624	5231.64	4848.44
sp|P31209|PABP_SCHPO	pab1	Polyadenylate-binding protein, cytoplasmic and nuclear OS=Schizosaccharomyces pombe (strain 972 / ATCC 24843) GN=pab1 PE=1 SV=2	143	29	C	2532.74	1914.84	2316.45	2293.89
sp|O13672|RL8_SCHPO	rpl8	60S ribosomal protein L8 OS=Schizosaccharomyces pombe (strain 972 / ATCC 24843) GN=rpl8 PE=1 SV=3	1416	29	C	2192.69	2463.79	3855.02	3974.98
sp|Q92345|PDC2_SCHPO	SPAC1F8.07c	Probable pyruvate decarboxylase C1F8.07c OS=Schizosaccharomyces pombe (strain 972 / ATCC 24843) GN=SPAC1F8.07c PE=1 SV=3	28	29	C	1671.77	1773.12	1566.75	1683.29
sp|O94641|HS104_SCHPO	hsp104	Heat shock protein 104 OS=Schizosaccharomyces pombe (strain 972 / ATCC 24843) GN=hsp104 PE=3 SV=1	89	28	C	1593.55	1431.59	2112.45	1916.66
sp|O74760|EIF3A_SCHPO	tif32	Eukaryotic translation initiation factor 3 subunit A OS=Schizosaccharomyces pombe (strain 972 / ATCC 24843) GN=tif32 PE=1 SV=1	177	27	C	3229.07	3160.87	2923.67	2756.34
sp|O13923|CORO_SCHPO	crn1	Coronin-like protein crn1 OS=Schizosaccharomyces pombe (strain 972 / ATCC 24843) GN=crn1 PE=1 SV=1	596	26	C	986.846	1467.7	414.811	414.846
sp|O60128|RS3_SCHPO	rps3	40S ribosomal protein S3 OS=Schizosaccharomyces pombe (strain 972 / ATCC 24843) GN=rps3 PE=1 SV=1	87	26	C	2478.49	2583.24	3104.12	3253.58
sp|P36620|ILVB_SCHPO	ilv1	Acetolactate synthase, mitochondrial OS=Schizosaccharomyces pombe (strain 972 / ATCC 24843) GN=ilv1 PE=3 SV=2	74	26	C	2921.77	2463.08	2866.77	3085.28
sp|P47943|IF4A_SCHPO	tif1	ATP-dependent RNA helicase eIF4A OS=Schizosaccharomyces pombe (strain 972 / ATCC 24843) GN=tif1 PE=1 SV=2	321	26	C	1087.85	1169.33	1285.15	1457.22
sp|O42938|PFKA_SCHPO	pfk1	ATP-dependent 6-phosphofructokinase OS=Schizosaccharomyces pombe (strain 972 / ATCC 24843) GN=pfk1 PE=1 SV=1	261	25	C	1728.42	1913.66	1773.42	1557.88
sp|O14164|EIF3C_SCHPO	nip1	Eukaryotic translation initiation factor 3 subunit C OS=Schizosaccharomyces pombe (strain 972 / ATCC 24843) GN=nip1 PE=1 SV=2	259	25	C	1953.42	1507.06	1839.34	1676.16
sp|Q9UUI4|YIY9_SCHPO	SPAC22F8.09	Uncharacterized protein C22F8.09 OS=Schizosaccharomyces pombe (strain 972 / ATCC 24843) GN=SPAC22F8.09 PE=1 SV=1	430	25	C	515.315	598.034	3236.98	3098
sp|O74864|RLA0_SCHPO	rpp0	60S acidic ribosomal protein P0 OS=Schizosaccharomyces pombe (strain 972 / ATCC 24843) GN=rpp0 PE=3 SV=1	1046	25	C	1532.38	1317.08	1852.38	1876.27
sp|Q9P6L5|SLA2_SCHPO	end4	Endocytosis protein end4 OS=Schizosaccharomyces pombe (strain 972 / ATCC 24843) GN=end4 PE=1 SV=2	73	25	C	11366	7536.69	1027.98	1048.1
sp|Q9Y7U7|SND1_SCHPO	snd1	Staphylococcal nuclease domain-containing protein 1 OS=Schizosaccharomyces pombe (strain 972 / ATCC 24843) GN=snd1 PE=1 SV=1	828	25	C	1497.85	1893.79	2020.27	2163.33
sp|O94514|NOP56_SCHPO	nop56	Nucleolar protein 56 OS=Schizosaccharomyces pombe (strain 972 / ATCC 24843) GN=nop56 PE=3 SV=1	398	24	C	4689.82	3657.71	2638.67	2428.16
sp|P24782|DBP2_SCHPO	dbp2	ATP-dependent RNA helicase dbp2 OS=Schizosaccharomyces pombe (strain 972 / ATCC 24843) GN=dbp2 PE=2 SV=2	256	24	C	1995.89	1841.42	2073.02	1979.18
sp|O13370|DED1_SCHPO	ded1	ATP-dependent RNA helicase ded1 OS=Schizosaccharomyces pombe (strain 972 / ATCC 24843) GN=ded1 PE=1 SV=1	256	23	C	1869.54	1536.43	1939.21	1780.14
sp|P87048|RPN1_SCHPO	rpn1	26S proteasome regulatory subunit rpn1 OS=Schizosaccharomyces pombe (strain 972 / ATCC 24843) GN=rpn1 PE=1 SV=2	226	23	C	1845.24	1889.17	1727.72	1801.89
sp|Q9P3A7|CDC48_SCHPO	cdc48	Cell division cycle protein 48 OS=Schizosaccharomyces pombe (strain 972 / ATCC 24843) GN=cdc48 PE=1 SV=2	181	23	C	1166.09	1063.57	1138.34	1217.25
sp|P87144|SYTC_SCHPO	ths1	Threonine--tRNA ligase, cytoplasmic OS=Schizosaccharomyces pombe (strain 972 / ATCC 24843) GN=ths1 PE=3 SV=1	37	23	C	938.799	697.78	991.984	1118.52
sp|Q10208|KPYK_SCHPO	pyk1	Pyruvate kinase OS=Schizosaccharomyces pombe (strain 972 / ATCC 24843) GN=pyk1 PE=1 SV=1	134	22	C	1175.61	1149.1	1187.3	1080.93
sp|P78958|G3P1_SCHPO	tdh1	Glyceraldehyde-3-phosphate dehydrogenase 1 OS=Schizosaccharomyces pombe (strain 972 / ATCC 24843) GN=tdh1 PE=1 SV=1	67	22	C	1823.97	1553.56	1462.92	1351.89
sp|P78811|UGPA1_SCHPO	fuy1	Probable UTP--glucose-1-phosphate uridylyltransferase OS=Schizosaccharomyces pombe (strain 972 / ATCC 24843) GN=fuy1 PE=1 SV=2	691	22	C	1284.08	1273.07	1469.04	1385.19
sp|O74718|ERF3_SCHPO	sup35	Eukaryotic peptide chain release factor GTP-binding subunit OS=Schizosaccharomyces pombe (strain 972 / ATCC 24843) GN=sup35 PE=1 SV=2	12	22	C	1651.4	1662.85	1760.4	1748.99
sp|O42943|YBP8_SCHPO	SPBC16H5.08c	Uncharacterized ABC transporter ATP-binding protein C16H5.08c OS=Schizosaccharomyces pombe (strain 972 / ATCC 24843) GN=SPBC16H5.08c PE=1 SV=1	326	22	C	1274.4	1129.45	1404.8	1400.51
sp|O74892|RS2_SCHPO	rps2	40S ribosomal protein S2 OS=Schizosaccharomyces pombe (strain 972 / ATCC 24843) GN=rps2 PE=1 SV=1	221	22	C	2221.92	2151.4	2665.56	2759.96
sp|O94653|BMS1_SCHPO	bms1	Ribosome biogenesis protein bms1 OS=Schizosaccharomyces pombe (strain 972 / ATCC 24843) GN=bms1 PE=1 SV=2	36	21	C	1832.38	1805.58	1447.42	1320.22
sp|Q10411|SPO15_SCHPO	spo15	Sporulation-specific protein 15 OS=Schizosaccharomyces pombe (strain 972 / ATCC 24843) GN=spo15 PE=1 SV=1	513	21	C	1070.03	835.495	993.31	973.412
sp|O42931|PRS7_SCHPO	rpt1	26S protease regulatory subunit 7 homolog OS=Schizosaccharomyces pombe (strain 972 / ATCC 24843) GN=rpt1 PE=1 SV=2	678	21	C	1496.87	1498.31	1901.01	1888.37
sp|O60100|IMB4_SCHPO	kap123	Probable importin subunit beta-4 OS=Schizosaccharomyces pombe (strain 972 / ATCC 24843) GN=kap123 PE=3 SV=1	553	21	C	1791.55	2042.24	1804.4	1852.02
sp|Q9UUG1|RPF2_SCHPO	SPAC926.08c	Ribosome production factor 2 homolog OS=Schizosaccharomyces pombe (strain 972 / ATCC 24843) GN=SPAC926.08c PE=1 SV=1	911	21	C	765.679	1043.19	2311.48	2546.44
sp|O60058|AFG2_SCHPO	afg2	ATPase family gene 2 protein OS=Schizosaccharomyces pombe (strain 972 / ATCC 24843) GN=afg2 PE=3 SV=1	284	21	C	983.295	991.961	1647.33	1915.1
sp|P56329|IF2B_SCHPO	tif212	Probable eukaryotic translation initiation factor 2 subunit beta OS=Schizosaccharomyces pombe (strain 972 / ATCC 24843) GN=tif212 PE=1 SV=2	694	20	C	1784.77	1316.37	1330.35	1188.69
sp|O14232|MTR4_SCHPO	mtr4	ATP-dependent RNA helicase mtr4 OS=Schizosaccharomyces pombe (strain 972 / ATCC 24843) GN=mtr4 PE=1 SV=1	765	20	C	995.967	953.208	2043.64	1826.71
sp|O13775|SYEC_SCHPO	gus1	Probable glutamate--tRNA ligase, cytoplasmic OS=Schizosaccharomyces pombe (strain 972 / ATCC 24843) GN=gus1 PE=1 SV=1	47	20	C	1860.29	1960.27	2090.9	1987.6
sp|O13972|GLYD_SCHPO	SPAC24C9.12c	Probable serine hydroxymethyltransferase, cytosolic OS=Schizosaccharomyces pombe (strain 972 / ATCC 24843) GN=SPAC24C9.12c PE=3 SV=1	330	20	C	1404.47	1989.78	1416.3	1377.39
sp|P87115|YDK9_SCHPO	SPAC20G8.09c	UPF0202 protein C20G8.09c OS=Schizosaccharomyces pombe (strain 972 / ATCC 24843) GN=SPAC20G8.09c PE=3 SV=1	20	20	C	1651.25	1521.69	1416.35	1413.35
sp|P78963|SKB1_SCHPO	skb1	Protein arginine N-methyltransferase skb1 OS=Schizosaccharomyces pombe (strain 972 / ATCC 24843) GN=skb1 PE=1 SV=2	597	20	C	1731.44	1797.13	611.716	636.273
sp|Q96WV5|COPA_SCHPO	SPBPJ4664.04	Putative coatomer subunit alpha OS=Schizosaccharomyces pombe (strain 972 / ATCC 24843) GN=SPBPJ4664.04 PE=1 SV=1	21	20	C	1083.17	1255.35	1489.48	1686.65
sp|P56286|IF2A_SCHPO	tif211	Eukaryotic translation initiation factor 2 subunit alpha OS=Schizosaccharomyces pombe (strain 972 / ATCC 24843) GN=tif211 PE=1 SV=1	14	19	C	2094.3	1750.46	2108.8	1903.79
sp|O74175|RL13_SCHPO	rpl13	60S ribosomal protein L13 OS=Schizosaccharomyces pombe (strain 972 / ATCC 24843) GN=rpl13 PE=1 SV=1	1164	19	C	1767.43	2074.6	4131	3897.26
sp|O74752|MAS5_SCHPO	mas5	Mitochondrial protein import protein mas5 OS=Schizosaccharomyces pombe (strain 972 / ATCC 24843) GN=mas5 PE=3 SV=1	421	19	C	1561.94	2053.86	1676.85	1588.58
sp|P40921|EF1G_SCHPO	tef3	Elongation factor 1-gamma OS=Schizosaccharomyces pombe (strain 972 / ATCC 24843) GN=tef3 PE=1 SV=1	190	19	C	2014.24	1712.71	1771.11	1736.57
sp|Q9HEQ9|TCG1_SCHPO	tcg1	Single-stranded TG1-3 DNA-binding protein OS=Schizosaccharomyces pombe (strain 972 / ATCC 24843) GN=tcg1 PE=1 SV=3	296	19	C	1231.89	1227.53	1898.27	1937.9
sp|O14217|TOM70_SCHPO	tom70	Probable mitochondrial import receptor subunit tom70 OS=Schizosaccharomyces pombe (strain 972 / ATCC 24843) GN=tom70 PE=1 SV=1	339	19	C	1368.82	1411.62	1436.48	1481.48
sp|P78827|ILV5_SCHPO	ilv5	Probable ketol-acid reductoisomerase, mitochondrial OS=Schizosaccharomyces pombe (strain 972 / ATCC 24843) GN=ilv5 PE=1 SV=2	308	19	C	1072.34	1018.4	814.97	864.004
sp|O42947|YBPC_SCHPO	SPBC16H5.12c	Uncharacterized protein C16H5.12c OS=Schizosaccharomyces pombe (strain 972 / ATCC 24843) GN=SPBC16H5.12c PE=1 SV=3	450	19	C	1353.31	1215.27	1367.16	1512.5
sp|Q10489|ODPA_SCHPO	pda1	Pyruvate dehydrogenase E1 component subunit alpha, mitochondrial OS=Schizosaccharomyces pombe (strain 972 / ATCC 24843) GN=pda1 PE=1 SV=1	788	18	C	2316.44	1838.72	1660.09	1384.5
sp|Q9P3W6|YLI2_SCHPO	SPAC458.02c	Uncharacterized protein C458.02c OS=Schizosaccharomyces pombe (strain 972 / ATCC 24843) GN=SPAC458.02c PE=1 SV=1	152	18	C	2419.17	1740.12	2319.02	2042.77
sp|P87142|YDMC_SCHPO	SPAC57A7.12	Heat shock protein 70 homolog C57A7.12 OS=Schizosaccharomyces pombe (strain 972 / ATCC 24843) GN=SPAC57A7.12 PE=1 SV=3	443	18	C	1049.89	971.082	1180.24	1068.07
sp|Q09781|RS3A1_SCHPO	rps101	40S ribosomal protein S1-A OS=Schizosaccharomyces pombe (strain 972 / ATCC 24843) GN=rps101 PE=3 SV=2	453	18	C	1780.81	1613.16	2669.13	2446.69
sp|O13831|TRP_SCHPO	trp2	Tryptophan synthase OS=Schizosaccharomyces pombe (strain 972 / ATCC 24843) GN=trp2 PE=2 SV=1	860	18	C	1902.24	1600.94	1677.48	1591.7
sp|Q9USW5|RS4B_SCHPO	rps4b	40S ribosomal protein S4-B OS=Schizosaccharomyces pombe (strain 972 / ATCC 24843) GN=rps4b PE=1 SV=1	1085	18	C	1192.86	1070.05	1667.1	1585.4
sp|O14134|ELF1_SCHPO	elf1	mRNA export factor elf1 OS=Schizosaccharomyces pombe (strain 972 / ATCC 24843) GN=elf1 PE=1 SV=1	276	18	C	1137.49	1095.78	1366.02	1310.76
sp|O94501|TCPA_SCHPO	cct1	T-complex protein 1 subunit alpha OS=Schizosaccharomyces pombe (strain 972 / ATCC 24843) GN=cct1 PE=3 SV=1	270	18	C	1696.82	1357.19	1057.44	1031.63
sp|Q9Y7I8|ZUO1_SCHPO	zuo1	Zuotin OS=Schizosaccharomyces pombe (strain 972 / ATCC 24843) GN=zuo1 PE=1 SV=2	27	18	C	1376.38	1357.86	1606.72	1598.77
sp|Q9P7R0|ARO1_SCHPO	aro1	Pentafunctional AROM polypeptide OS=Schizosaccharomyces pombe (strain 972 / ATCC 24843) GN=aro1 PE=3 SV=1	57	18	C	867.129	907.415	971.905	975.508
sp|P40976|LYS2_SCHPO	lys1	L-aminoadipate-semialdehyde dehydrogenase OS=Schizosaccharomyces pombe (strain 972 / ATCC 24843) GN=lys1 PE=1 SV=3	228	18	C	1639.57	1731.28	1550.03	1563.15
sp|O13637|SEC31_SCHPO	sec31	Protein transport protein sec31 OS=Schizosaccharomyces pombe (strain 972 / ATCC 24843) GN=sec31 PE=1 SV=1	59	18	C	1138.96	1097.91	1096.42	1175.96
sp|Q10179|SYG_SCHPO	grs1	Putative glycine--tRNA ligase OS=Schizosaccharomyces pombe (strain 972 / ATCC 24843) GN=grs1 PE=3 SV=1	99	18	C	1453.44	1432.41	1412.04	1538.08
sp|O74781|SYRC_SCHPO	mrs1	Probable arginine--tRNA ligase, cytoplasmic OS=Schizosaccharomyces pombe (strain 972 / ATCC 24843) GN=mrs1 PE=2 SV=1	581	18	C	661.964	563.69	750.38	872.98
sp|P05734|RL19A_SCHPO	rpl19a	60S ribosomal protein L19-A OS=Schizosaccharomyces pombe (strain 972 / ATCC 24843) GN=rpl19a PE=1 SV=3	371	17	C	1356.95	1586.75	2605.68	1966.92
sp|O42914|YBI8_SCHPO	SPBC16A3.08c	Uncharacterized protein C16A3.08c OS=Schizosaccharomyces pombe (strain 972 / ATCC 24843) GN=SPBC16A3.08c PE=1 SV=1	444	17	C	1185.1	932.751	1426.74	1224.4
sp|P36602|RIR1_SCHPO	cdc22	Ribonucleoside-diphosphate reductase large chain OS=Schizosaccharomyces pombe (strain 972 / ATCC 24843) GN=cdc22 PE=1 SV=2	149	17	C	1108.45	1114.32	1272.1	1152.9
sp|P08093|RL2_SCHPO	rpl2a	60S ribosomal protein L2 OS=Schizosaccharomyces pombe (strain 972 / ATCC 24843) GN=rpl2a PE=3 SV=2	1247	17	C	1872.38	1679.34	3461.1	3182.47
sp|O74341|TCPG_SCHPO	cct3	T-complex protein 1 subunit gamma OS=Schizosaccharomyces pombe (strain 972 / ATCC 24843) GN=cct3 PE=1 SV=1	441	17	C	1238.12	1357.74	1456.52	1396.89
sp|Q9P546|RSSA2_SCHPO	rps0b	40S ribosomal protein S0-B OS=Schizosaccharomyces pombe (strain 972 / ATCC 24843) GN=rps0b PE=1 SV=1	787	17	C	1887.5	1768.59	1803.48	1754.17
sp|Q9UT32|RL1DB_SCHPO	SPAC8F11.04	Putative ribosome biogenesis protein C8F11.04 OS=Schizosaccharomyces pombe (strain 972 / ATCC 24843) GN=SPAC8F11.04 PE=3 SV=1	762	17	C	1044.77	889.724	2969.66	2913.62
sp|O14339|RL17A_SCHPO	rpl17a	60S ribosomal protein L17-A OS=Schizosaccharomyces pombe (strain 972 / ATCC 24843) GN=rpl17a PE=3 SV=1	191	17	C	1595.55	1252.3	2812.97	2892.87
sp|O74402|HSP78_SCHPO	hsp78	Heat shock protein 78, mitochondrial OS=Schizosaccharomyces pombe (strain 972 / ATCC 24843) GN=hsp78 PE=3 SV=1	248	17	C	682.183	795.69	796.436	827.833
sp|Q9C102|GLT1_SCHPO	glt1	Putative glutamate synthase [NADPH] OS=Schizosaccharomyces pombe (strain 972 / ATCC 24843) GN=glt1 PE=2 SV=1	86	17	C	1167.9	1414.29	951.79	990.919
sp|O14289|LEUC_SCHPO	leu2	3-isopropylmalate dehydratase OS=Schizosaccharomyces pombe (strain 972 / ATCC 24843) GN=leu2 PE=1 SV=1	251	17	C	462.239	652.44	566.839	592.158
sp|Q09878|MET10_SCHPO	SPCC584.01c	Probable sulfite reductase [NADPH] flavoprotein component OS=Schizosaccharomyces pombe (strain 972 / ATCC 24843) GN=SPCC584.01c PE=3 SV=2	104	17	C	1286.15	1253.32	1249.18	1326.95
sp|O94692|RUVB2_SCHPO	rvb2	RuvB-like helicase 2 OS=Schizosaccharomyces pombe (strain 972 / ATCC 24843) GN=rvb2 PE=1 SV=1	316	17	C	948.42	976.488	1096.94	1177.3
sp|O74423|ENT1_SCHPO	ent1	Epsin-1 OS=Schizosaccharomyces pombe (strain 972 / ATCC 24843) GN=ent1 PE=1 SV=1	478	17	C	5297.31	8353.97	578.113	632.488
sp|P31411|VATB_SCHPO	vma2	V-type proton ATPase subunit B OS=Schizosaccharomyces pombe (strain 972 / ATCC 24843) GN=vma2 PE=1 SV=2	674	17	C	756.066	818.445	661.284	767.121
sp|O60101|PGK_SCHPO	pgk1	Phosphoglycerate kinase OS=Schizosaccharomyces pombe (strain 972 / ATCC 24843) GN=pgk1 PE=1 SV=1	91	17	C	1169.32	1093.58	786.865	954.295
sp|Q10251|IF2P_SCHPO	SPAC56F8.03	Eukaryotic translation initiation factor 5B OS=Schizosaccharomyces pombe (strain 972 / ATCC 24843) GN=SPAC56F8.03 PE=1 SV=1	376	16	C	1224.52	971.926	1408.33	1183
sp|O74191|FKBP4_SCHPO	fkbp39	FK506-binding protein 39 kDa OS=Schizosaccharomyces pombe (strain 972 / ATCC 24843) GN=fkbp39 PE=1 SV=1	666	16	C	1526.27	1252.2	1339.79	1162.16
sp|O60102|RLI1_SCHPO	rli1	Translation initiation factor rli1 OS=Schizosaccharomyces pombe (strain 972 / ATCC 24843) GN=rli1 PE=3 SV=1	117	16	C	841.33	811.858	951.02	845.407
sp|O74960|PIL1_SCHPO	pil1	Probable sphingolipid long chain base-responsive protein pil1 OS=Schizosaccharomyces pombe (strain 972 / ATCC 24843) GN=pil1 PE=1 SV=1	473	16	C	7004.23	4665.6	837.027	752.935
sp|O43024|YGVA_SCHPO	SPBC354.10	CUE domain-containing protein C354.10 OS=Schizosaccharomyces pombe (strain 972 / ATCC 24843) GN=SPBC354.10 PE=1 SV=1	455	16	C	950.425	788.158	770.649	708.359
sp|O94236|EIF3D_SCHPO	moe1	Eukaryotic translation initiation factor 3 subunit D OS=Schizosaccharomyces pombe (strain 972 / ATCC 24843) GN=moe1 PE=1 SV=1	378	16	C	1723.86	1467.72	1328.54	1268.39
sp|Q92372|RFA1_SCHPO	ssb1	Replication factor A protein 1 OS=Schizosaccharomyces pombe (strain 972 / ATCC 24843) GN=ssb1 PE=1 SV=1	131	16	C	4308.05	2601.91	709.46	697.41
sp|P00332|ADH_SCHPO	adh1	Alcohol dehydrogenase OS=Schizosaccharomyces pombe (strain 972 / ATCC 24843) GN=adh1 PE=1 SV=2	880	16	C	2193.62	1913.78	2165.92	2132.55
sp|Q9UUF2|SYMC_SCHPO	rar1	Probable methionine--tRNA ligase, cytoplasmic OS=Schizosaccharomyces pombe (strain 972 / ATCC 24843) GN=rar1 PE=3 SV=1	357	16	C	1876.13	1715.2	1484.15	1463.59
sp|P78921|TCPQ_SCHPO	cct8	Probable T-complex protein 1 subunit theta OS=Schizosaccharomyces pombe (strain 972 / ATCC 24843) GN=cct8 PE=2 SV=3	291	16	C	1081.33	1346.96	891.836	890.987
sp|Q09722|EIF3M_SCHPO	eif3m	Eukaryotic translation initiation factor 3 subunit M OS=Schizosaccharomyces pombe (strain 972 / ATCC 24843) GN=eif3m PE=1 SV=2	199	16	C	1860.08	3007.24	1445.01	1466.52
sp|O14370|BCA1_SCHPO	eca39	Branched-chain-amino-acid aminotransferase, mitochondrial OS=Schizosaccharomyces pombe (strain 972 / ATCC 24843) GN=eca39 PE=1 SV=3	968	16	C	1585.73	1611.73	1437.02	1463.55
sp|Q10101|RS7_SCHPO	rps7	40S ribosomal protein S7 OS=Schizosaccharomyces pombe (strain 972 / ATCC 24843) GN=rps7 PE=1 SV=2	340	16	C	1771.61	1397.62	2082.91	2128.27
sp|O14126|PRS6A_SCHPO	tbp1	26S protease regulatory subunit 6A OS=Schizosaccharomyces pombe (strain 972 / ATCC 24843) GN=tbp1 PE=3 SV=1	420	16	C	933.454	874.623	1057.09	1119.65
sp|O60179|UTP10_SCHPO	utp10	U3 small nucleolar RNA-associated protein 10 OS=Schizosaccharomyces pombe (strain 972 / ATCC 24843) GN=utp10 PE=3 SV=1	338	16	C	1075.57	1026.19	1021.52	1117.29
sp|Q9P7W3|ACL1_SCHPO	SPBC1703.07	Probable ATP-citrate synthase subunit 1 OS=Schizosaccharomyces pombe (strain 972 / ATCC 24843) GN=SPBC1703.07 PE=1 SV=1	222	16	C	407.346	438.038	505.063	563.646
sp|P36591|DYR_SCHPO	dfr1	Dihydrofolate reductase OS=Schizosaccharomyces pombe (strain 972 / ATCC 24843) GN=dfr1 PE=2 SV=2	151	15	C	2403.79	1976.58	1542.87	1209.61
sp|O14363|RL1A_SCHPO	rpl1a	60S ribosomal protein L1-A OS=Schizosaccharomyces pombe (strain 972 / ATCC 24843) GN=rpl1a PE=1 SV=1	1128	15	C	2530.25	2573.06	4269.79	3466.36
sp|P79071|RL6_SCHPO	rpl6	60S ribosomal protein L6 OS=Schizosaccharomyces pombe (strain 972 / ATCC 24843) GN=rpl6 PE=1 SV=2	657	15	C	1134.92	813.942	2920.22	2627.97
sp|P78795|EIF3G_SCHPO	tif35	Eukaryotic translation initiation factor 3 subunit G OS=Schizosaccharomyces pombe (strain 972 / ATCC 24843) GN=tif35 PE=1 SV=2	922	15	C	1376.03	1073.17	1094.43	989.316
sp|Q9P7S7|NOP58_SCHPO	nop58	Nucleolar protein 58 OS=Schizosaccharomyces pombe (strain 972 / ATCC 24843) GN=nop58 PE=1 SV=1	489	15	C	2483.57	2096.32	1404.78	1319.78
sp|P25457|RL7B_SCHPO	rpl7b	60S ribosomal protein L7-B OS=Schizosaccharomyces pombe (strain 972 / ATCC 24843) GN=rpl7b PE=3 SV=1	128	15	C	1131.83	1388.07	3309.18	3133.59
sp|O59945|FIMB_SCHPO	fim1	Fimbrin OS=Schizosaccharomyces pombe (strain 972 / ATCC 24843) GN=fim1 PE=1 SV=1	159	15	C	1533.86	1944.85	470.246	460.253
sp|P79083|EIF3I_SCHPO	sum1	Eukaryotic translation initiation factor 3 subunit I OS=Schizosaccharomyces pombe (strain 972 / ATCC 24843) GN=sum1 PE=1 SV=1	293	15	C	1161.84	1222.99	1190.22	1167.52
sp|Q10147|TCPB_SCHPO	cct2	Probable T-complex protein 1 subunit beta OS=Schizosaccharomyces pombe (strain 972 / ATCC 24843) GN=cct2 PE=3 SV=1	524	15	C	1229.44	1190.05	1311	1287.93
sp|O94515|TCPZ_SCHPO	cct6	T-complex protein 1 subunit zeta OS=Schizosaccharomyces pombe (strain 972 / ATCC 24843) GN=cct6 PE=3 SV=1	794	15	C	809.741	904.357	780.981	771.746
sp|P41836|PRS8_SCHPO	let1	26S protease regulatory subunit 8 homolog OS=Schizosaccharomyces pombe (strain 972 / ATCC 24843) GN=let1 PE=3 SV=1	284	15	C	987.155	920.509	1191.28	1185.61
sp|O74407|SYDC_SCHPO	dps1	Aspartate--tRNA ligase, cytoplasmic OS=Schizosaccharomyces pombe (strain 972 / ATCC 24843) GN=dps1 PE=1 SV=1	368	15	C	815.435	818.425	900.053	902.583
sp|Q9USI5|STI1_SCHPO	sti1	Heat shock protein sti1 homolog OS=Schizosaccharomyces pombe (strain 972 / ATCC 24843) GN=sti1 PE=3 SV=1	298	15	C	944.135	1282.75	675.766	702.509
sp|O74976|FAT2_SCHPO	SPCC1827.03c	Putative peroxisomal-coenzyme A synthetase OS=Schizosaccharomyces pombe (strain 972 / ATCC 24843) GN=SPCC1827.03c PE=1 SV=1	409	15	C	1920.42	1898.59	1863.72	1949.52
sp|O94718|IPI1_SCHPO	ipi1	Pre-rRNA-processing protein ipi1 OS=Schizosaccharomyces pombe (strain 972 / ATCC 24843) GN=ipi1 PE=3 SV=2	575	15	C	356.9	543.605	3006.25	3195.38
sp|P40370|ENO11_SCHPO	eno101	Enolase 1-1 OS=Schizosaccharomyces pombe (strain 972 / ATCC 24843) GN=eno101 PE=1 SV=2	8	15	C	788.665	680.783	657.016	724.556
sp|O60180|ARX1_SCHPO	arx1	Probable metalloprotease arx1 OS=Schizosaccharomyces pombe (strain 972 / ATCC 24843) GN=arx1 PE=3 SV=1	116	15	C	278.13	345.752	3441.95	3867.57
sp|O13914|SYA_SCHPO	ala1	Alanine--tRNA ligase OS=Schizosaccharomyces pombe (strain 972 / ATCC 24843) GN=ala1 PE=1 SV=1	392	15	C	537.023	682.539	630.468	731.672
sp|Q9UT19|METE_SCHPO	met26	Probable 5-methyltetrahydropteroyltriglutamate--homocysteine methyltransferase OS=Schizosaccharomyces pombe (strain 972 / ATCC 24843) GN=met26 PE=1 SV=1	52	15	C	916.143	1171.61	787.404	924.165
sp|O60143|RL7C_SCHPO	rpl7c	60S ribosomal protein L7-C OS=Schizosaccharomyces pombe (strain 972 / ATCC 24843) GN=rpl7c PE=1 SV=1	128	14	C	976.508	684.759	2664.28	2159.55
sp|Q09757|RS9A_SCHPO	rps9a	40S ribosomal protein S9-A OS=Schizosaccharomyces pombe (strain 972 / ATCC 24843) GN=rps9a PE=1 SV=2	990	14	C	917.162	868.769	1104.11	910.469
sp|O59816|ODP2_SCHPO	lat1	Dihydrolipoyllysine-residue acetyltransferase component of pyruvate dehydrogenase complex, mitochondrial OS=Schizosaccharomyces pombe (strain 972 / ATCC 24843) GN=lat1 PE=3 SV=1	48	14	C	1197.52	1019.85	795.762	661.125
sp|P87147|NACA_SCHPO	egd2	Nascent polypeptide-associated complex subunit alpha OS=Schizosaccharomyces pombe (strain 972 / ATCC 24843) GN=egd2 PE=1 SV=1	198	14	C	898.278	736.062	887.914	763.42
sp|O43007|C1TM_SCHPO	ade9	C-1-tetrahydrofolate synthase, mitochondrial OS=Schizosaccharomyces pombe (strain 972 / ATCC 24843) GN=ade9 PE=3 SV=3	693	14	C	1177.01	1035.98	1342.38	1202.3
sp|Q9UU79|NSA2_SCHPO	nsa2	Ribosome biogenesis protein nsa2 OS=Schizosaccharomyces pombe (strain 972 / ATCC 24843) GN=nsa2 PE=1 SV=1	545	14	C	410.04	468.087	2345.24	2172.74
sp|Q9UTM4|TCPE_SCHPO	cct5	T-complex protein 1 subunit epsilon OS=Schizosaccharomyces pombe (strain 972 / ATCC 24843) GN=cct5 PE=3 SV=1	601	14	C	1059.58	851.443	893.892	836.077
sp|P78814|SRP2_SCHPO	srp2	Pre-mRNA-splicing factor srp2 OS=Schizosaccharomyces pombe (strain 972 / ATCC 24843) GN=srp2 PE=1 SV=2	233	14	C	1168.65	804.951	1166.64	1095.36
sp|Q09747|DBP5_SCHPO	dbp5	ATP-dependent RNA helicase dbp5 OS=Schizosaccharomyces pombe (strain 972 / ATCC 24843) GN=dbp5 PE=1 SV=1	383	14	C	954.321	883.162	963.091	921.749
sp|O94754|RS18_SCHPO	rps18a	40S ribosomal protein S18 OS=Schizosaccharomyces pombe (strain 972 / ATCC 24843) GN=rps18a PE=1 SV=1	100	14	C	784.568	580.722	910.553	874.282
sp|Q9P7T8|YIW2_SCHPO	SPAC694.02	Uncharacterized helicase C694.02 OS=Schizosaccharomyces pombe (strain 972 / ATCC 24843) GN=SPAC694.02 PE=3 SV=1	39	14	C	1011.33	971.794	989.722	958.489
sp|Q10202|DBP3_SCHPO	dbp3	ATP-dependent RNA helicase dbp3 OS=Schizosaccharomyces pombe (strain 972 / ATCC 24843) GN=dbp3 PE=3 SV=1	348	14	C	1591.25	1808.1	1447.33	1433.7
sp|O14069|RL28E_SCHPO	rpl28e	Probable 60S ribosomal protein L28e OS=Schizosaccharomyces pombe (strain 972 / ATCC 24843) GN=rpl28e PE=1 SV=1	496	14	C	758.355	886.094	1452.67	1448.28
sp|P87112|NOT1_SCHPO	not1	General negative regulator of transcription subunit 1 OS=Schizosaccharomyces pombe (strain 972 / ATCC 24843) GN=not1 PE=1 SV=1	26	14	C	735.216	826.336	973.617	975.467
sp|Q09188|ADT_SCHPO	anc1	ADP,ATP carrier protein OS=Schizosaccharomyces pombe (strain 972 / ATCC 24843) GN=anc1 PE=2 SV=1	1213	14	C	1041.53	1202.79	1347.33	1357.07
sp|P42656|RAD24_SCHPO	rad24	DNA damage checkpoint protein rad24 OS=Schizosaccharomyces pombe (strain 972 / ATCC 24843) GN=rad24 PE=1 SV=2	66	14	C	1367.99	1152.67	1376.24	1402.82
sp|O42937|COPB2_SCHPO	sec27	Probable coatomer subunit beta' OS=Schizosaccharomyces pombe (strain 972 / ATCC 24843) GN=sec27 PE=3 SV=2	353	14	C	669.71	593.773	992.059	1017.52
sp|Q10057|PDI1_SCHPO	SPAC1F5.02	Putative protein disulfide-isomerase C1F5.02 OS=Schizosaccharomyces pombe (strain 972 / ATCC 24843) GN=SPAC1F5.02 PE=3 SV=1	93	14	C	502.533	494.021	625.018	657.947
sp|Q9C0X6|RUVB1_SCHPO	rvb1	RuvB-like helicase 1 OS=Schizosaccharomyces pombe (strain 972 / ATCC 24843) GN=rvb1 PE=3 SV=1	972	14	C	1285.39	1265.65	1743.49	1856.08
sp|P36612|PRS4_SCHPO	mts2	26S protease regulatory subunit 4 homolog OS=Schizosaccharomyces pombe (strain 972 / ATCC 24843) GN=mts2 PE=2 SV=1	284	14	C	1077.76	1276.95	1280.62	1366.25
sp|P36580|ALF_SCHPO	fba1	Fructose-bisphosphate aldolase OS=Schizosaccharomyces pombe (strain 972 / ATCC 24843) GN=fba1 PE=1 SV=2	510	14	C	652.261	782.12	695.615	747.024
sp|O14055|SYYC_SCHPO	tys1	Tyrosine--tRNA ligase, cytoplasmic OS=Schizosaccharomyces pombe (strain 972 / ATCC 24843) GN=tys1 PE=3 SV=1	224	14	C	748.429	843.232	695.012	747.98
sp|Q9UUF7|COPB_SCHPO	sec26	Coatomer subunit beta OS=Schizosaccharomyces pombe (strain 972 / ATCC 24843) GN=sec26 PE=3 SV=1	211	14	C	699.715	879.468	937.074	1025.43
sp|P36621|CAP_SCHPO	cap1	Adenylyl cyclase-associated protein OS=Schizosaccharomyces pombe (strain 972 / ATCC 24843) GN=cap1 PE=1 SV=1	650	14	C	1361.37	1316.76	893.493	1003.6
sp|O14065|YC31_SCHPO	SPCC962.01	Uncharacterized protein C962.01 OS=Schizosaccharomyces pombe (strain 972 / ATCC 24843) GN=SPCC962.01 PE=2 SV=3	434	14	C	544.118	531.133	647.021	734.143
sp|Q10353|RLP24_SCHPO	rlp24	Ribosome biogenesis protein rlp24 OS=Schizosaccharomyces pombe (strain 972 / ATCC 24843) GN=rlp24 PE=3 SV=1	484	13	C	465.135	358.763	2223.68	1736.21
sp|O42958|PAT1_SCHPO	SPBC19G7.10c	DNA topoisomerase 2-associated protein pat1 OS=Schizosaccharomyces pombe (strain 972 / ATCC 24843) GN=SPBC19G7.10c PE=3 SV=2	416	13	C	1074.87	838.669	1655.21	1388.65
sp|P87058|LAH1_SCHPO	sla1	La protein homolog OS=Schizosaccharomyces pombe (strain 972 / ATCC 24843) GN=sla1 PE=1 SV=1	654	13	C	754.443	547.365	1475.01	1248.45
sp|O74399|ERB1_SCHPO	erb1	Ribosome biogenesis protein erb1 OS=Schizosaccharomyces pombe (strain 972 / ATCC 24843) GN=erb1 PE=1 SV=2	449	13	C	805.144	725.531	1466.49	1294.1
sp|P05732|RL20_SCHPO	rpl20a	60S ribosomal protein L20 OS=Schizosaccharomyces pombe (strain 972 / ATCC 24843) GN=rpl20a PE=1 SV=3	546	13	C	1103.15	975.653	2308.82	2062.83
sp|O13907|ACL2_SCHPO	SPAC22A12.16	Probable ATP-citrate synthase subunit 2 OS=Schizosaccharomyces pombe (strain 972 / ATCC 24843) GN=SPAC22A12.16 PE=1 SV=1	258	13	C	1491.56	1481.87	927.147	832.872
sp|O42935|RL32B_SCHPO	rpl32b	60S ribosomal protein L32-B OS=Schizosaccharomyces pombe (strain 972 / ATCC 24843) GN=rpl32b PE=3 SV=1	1185	13	C	1112.88	778.99	1876.02	1700.69
sp|P05752|RS6A_SCHPO	rps6a	40S ribosomal protein S6-A OS=Schizosaccharomyces pombe (strain 972 / ATCC 24843) GN=rps6a PE=1 SV=2	1426	13	C	1246.29	1464.94	1485.1	1352.36
sp|P87177|YB1C_SCHPO	SPBC3D6.12	Uncharacterized WD repeat-containing protein C3D6.12 OS=Schizosaccharomyces pombe (strain 972 / ATCC 24843) GN=SPBC3D6.12 PE=1 SV=1	206	13	C	868.792	803.989	829.214	768.409
sp|Q09330|MLO3_SCHPO	mlo3	mRNA export protein mlo3 OS=Schizosaccharomyces pombe (strain 972 / ATCC 24843) GN=mlo3 PE=1 SV=1	607	13	C	708.784	586.354	813.151	757.231
sp|P15398|RPA1_SCHPO	rpa1	DNA-directed RNA polymerase I subunit rpa1 OS=Schizosaccharomyces pombe (strain 972 / ATCC 24843) GN=rpa1 PE=1 SV=2	482	13	C	798.725	769.894	717.165	670.273
sp|P78810|VTC4_SCHPO	vtc4	Vacuolar transporter chaperone 4 OS=Schizosaccharomyces pombe (strain 972 / ATCC 24843) GN=vtc4 PE=1 SV=2	901	13	C	889.446	952.659	904.928	856.891
sp|Q9P3T6|RS5B_SCHPO	rps5b	40S ribosomal protein S5-B OS=Schizosaccharomyces pombe (strain 972 / ATCC 24843) GN=rps5b PE=3 SV=1	720	13	C	547.943	475.54	982.513	930.872
sp|P87157|YB0G_SCHPO	SPBC25H2.16c	Probable ADP-ribosylation factor-binding protein C25H2.16c OS=Schizosaccharomyces pombe (strain 972 / ATCC 24843) GN=SPBC25H2.16c PE=1 SV=1	42	13	C	839.96	757.166	1062.64	1026.78
sp|Q9P3A9|YIL5_SCHPO	SPAC1565.05	Uncharacterized protein C1565.05 OS=Schizosaccharomyces pombe (strain 972 / ATCC 24843) GN=SPAC1565.05 PE=4 SV=1	337	13	C	1838.44	2171.22	1215.72	1199.65
sp|O74978|YQL5_SCHPO	SPCC1827.05c	Uncharacterized RNA-binding protein C1827.05c OS=Schizosaccharomyces pombe (strain 972 / ATCC 24843) GN=SPCC1827.05c PE=3 SV=1	986	13	C	516.124	636.066	2237.95	2232.95
sp|Q9UT21|YFY7_SCHPO	SPAC9.07c	Uncharacterized GTP-binding protein C9.07c OS=Schizosaccharomyces pombe (strain 972 / ATCC 24843) GN=SPAC9.07c PE=2 SV=1	987	13	C	718.765	833.97	1110.05	1109.91
sp|P56289|IF5A1_SCHPO	tif51a	Eukaryotic translation initiation factor 5A-1 OS=Schizosaccharomyces pombe (strain 972 / ATCC 24843) GN=tif51a PE=1 SV=1	655	13	C	879.24	903.632	1031.72	1038.72
sp|Q9UT48|EIF3H_SCHPO	eif3h	Eukaryotic translation initiation factor 3 subunit H OS=Schizosaccharomyces pombe (strain 972 / ATCC 24843) GN=eif3h PE=1 SV=1	19	13	C	1408.49	1401.65	1348.69	1365.11
sp|O74895|RL15A_SCHPO	rpl15a	60S ribosomal protein L15-A OS=Schizosaccharomyces pombe (strain 972 / ATCC 24843) GN=rpl15a PE=3 SV=1	1092	13	C	1007.11	1189.58	2158.05	2301.62
sp|Q10281|GBLP_SCHPO	rkp1	Guanine nucleotide-binding protein subunit beta-like protein OS=Schizosaccharomyces pombe (strain 972 / ATCC 24843) GN=rkp1 PE=1 SV=3	439	13	C	1121.58	924.96	1107.25	1195.57
sp|O74873|SC231_SCHPO	sec231	Protein transport protein sec23-1 OS=Schizosaccharomyces pombe (strain 972 / ATCC 24843) GN=sec231 PE=3 SV=1	174	13	C	578.385	661.275	660.82	720.734
sp|P31406|VATA_SCHPO	vma1	V-type proton ATPase catalytic subunit A OS=Schizosaccharomyces pombe (strain 972 / ATCC 24843) GN=vma1 PE=3 SV=1	63	13	C	612.553	626.015	494.737	543.532
sp|O13998|OLA1_SCHPO	SPAC27E2.03c	Obg-like ATPase 1 OS=Schizosaccharomyces pombe (strain 972 / ATCC 24843) GN=SPAC27E2.03c PE=1 SV=1	220	13	C	459.29	487.083	488.536	562.409
sp|Q9URX6|RL31_SCHPO	rpl31	60S ribosomal protein L31 OS=Schizosaccharomyces pombe (strain 972 / ATCC 24843) GN=rpl31 PE=3 SV=1	313	12	C	731.134	710.537	2579.43	1735.51
sp|O36021|YEK9_SCHPO	SPAC4F10.09c	Uncharacterized protein C4F10.09c OS=Schizosaccharomyces pombe (strain 972 / ATCC 24843) GN=SPAC4F10.09c PE=1 SV=1	344	12	C	1305.09	1005.45	1137.9	926.533
sp|Q9P7J6|RS17B_SCHPO	rps17b	40S ribosomal protein S17-B OS=Schizosaccharomyces pombe (strain 972 / ATCC 24843) GN=rps17b PE=1 SV=1	370	12	C	1069.14	842.831	2086.13	1779.63
sp|O14007|CBF5_SCHPO	cbf5	H/ACA ribonucleoprotein complex subunit 4 OS=Schizosaccharomyces pombe (strain 972 / ATCC 24843) GN=cbf5 PE=3 SV=1	1276	12	C	2303.02	2042.39	1362.4	1170.04
sp|P35551|FBRL_SCHPO	fib1	rRNA 2'-O-methyltransferase fibrillarin OS=Schizosaccharomyces pombe (strain 972 / ATCC 24843) GN=fib1 PE=1 SV=1	750	12	C	2802.92	2165.45	1642.12	1412.7
sp|O14469|RS22_SCHPO	rps22a	40S ribosomal protein S22 OS=Schizosaccharomyces pombe (strain 972 / ATCC 24843) GN=rps22a PE=2 SV=1	1118	12	C	413.981	507.081	794.356	695.182
sp|O74879|NOL10_SCHPO	enp2	Ribosome biogenesis protein enp2 homolog OS=Schizosaccharomyces pombe (strain 972 / ATCC 24843) GN=enp2 PE=1 SV=1	609	12	C	1297.55	1175.61	966.961	875.693
sp|O14388|RL27A_SCHPO	rpl27a	60S ribosomal protein L27-A OS=Schizosaccharomyces pombe (strain 972 / ATCC 24843) GN=rpl27a PE=2 SV=2	1202	12	C	1412	1711.05	2333.16	2117.54
sp|Q09130|IF2G_SCHPO	tif213	Eukaryotic translation initiation factor 2 subunit gamma OS=Schizosaccharomyces pombe (strain 972 / ATCC 24843) GN=tif213 PE=2 SV=1	332	12	C	1211.53	1063.53	1147.6	1049.72
sp|P78773|ACSA_SCHPO	SPCC191.02c	Probable acetyl-coenzyme A synthetase OS=Schizosaccharomyces pombe (strain 972 / ATCC 24843) GN=SPCC191.02c PE=1 SV=2	255	12	C	776.218	743.067	863.657	820.23
sp|Q9HGM9|DNJC7_SCHPO	SPBC543.02c	DnaJ homolog subfamily C member 7 homolog OS=Schizosaccharomyces pombe (strain 972 / ATCC 24843) GN=SPBC543.02c PE=3 SV=1	309	12	C	831.914	999.115	682.099	648.135
sp|Q9USH9|YJQ1_SCHPO	SPCC825.01	Uncharacterized ABC transporter ATP-binding protein C825.01 OS=Schizosaccharomyces pombe (strain 972 / ATCC 24843) GN=SPCC825.01 PE=1 SV=1	614	12	C	740.325	660.448	811.523	774.561
sp|Q10107|NEP1_SCHPO	mra1	Ribosomal RNA small subunit methyltransferase mra1 OS=Schizosaccharomyces pombe (strain 972 / ATCC 24843) GN=mra1 PE=1 SV=2	555	12	C	921.316	984.555	1055.04	1015.02
sp|P87137|YDM6_SCHPO	SPAC57A7.06	Uncharacterized protein C57A7.06 OS=Schizosaccharomyces pombe (strain 972 / ATCC 24843) GN=SPAC57A7.06 PE=1 SV=1	175	12	C	991.961	911.026	701.281	677.136
sp|O74173|EF1B_SCHPO	tef5	Elongation factor 1-beta OS=Schizosaccharomyces pombe (strain 972 / ATCC 24843) GN=tef5 PE=2 SV=1	585	12	C	1082.26	1156.03	1012.08	979.335
sp|Q10157|RL11_SCHPO	rpl11a	60S ribosomal protein L11 OS=Schizosaccharomyces pombe (strain 972 / ATCC 24843) GN=rpl11a PE=1 SV=1	139	12	C	531.889	604.137	1216.24	1178.06
sp|Q09769|LONM_SCHPO	pim1	Lon protease homolog, mitochondrial OS=Schizosaccharomyces pombe (strain 972 / ATCC 24843) GN=pim1 PE=3 SV=1	599	12	C	888.472	1103.62	913.012	890.595
sp|P79016|RS19B_SCHPO	rps19b	40S ribosomal protein S19-B OS=Schizosaccharomyces pombe (strain 972 / ATCC 24843) GN=rps19b PE=3 SV=2	841	12	C	728.677	659.838	955.182	940.917
sp|O13811|PDI2_SCHPO	SPAC17H9.14c	Protein disulfide-isomerase C17H9.14c OS=Schizosaccharomyces pombe (strain 972 / ATCC 24843) GN=SPAC17H9.14c PE=3 SV=1	729	12	C	1199.42	1451.76	1003.73	1007.02
sp|Q9P7X8|RPA2_SCHPO	rpa2	Probable DNA-directed RNA polymerase I subunit RPA2 OS=Schizosaccharomyces pombe (strain 972 / ATCC 24843) GN=rpa2 PE=3 SV=2	373	12	C	831.843	737.034	728.263	732.01
sp|O74894|PRS6B_SCHPO	rpt3	26S protease regulatory subunit 6B homolog OS=Schizosaccharomyces pombe (strain 972 / ATCC 24843) GN=rpt3 PE=3 SV=1	284	12	C	897.97	911.107	1147.84	1166.99
sp|Q10421|RS28_SCHPO	rps28a	40S ribosomal protein S28 OS=Schizosaccharomyces pombe (strain 972 / ATCC 24843) GN=rps28a PE=3 SV=1	905	12	C	586.575	446.214	770.912	784.733
sp|O74855|NLE1_SCHPO	SPCC18.05c	Ribosome assembly protein 4 OS=Schizosaccharomyces pombe (strain 972 / ATCC 24843) GN=SPCC18.05c PE=3 SV=1	497	12	C	248.848	181.108	2559.23	2631.62
sp|O74476|IMB3_SCHPO	sal3	Importin subunit beta-3 OS=Schizosaccharomyces pombe (strain 972 / ATCC 24843) GN=sal3 PE=3 SV=1	611	12	C	501.497	514.736	631.377	649.385
sp|Q9UTM3|RPN5_SCHPO	rpn5a	26S proteasome regulatory subunit rpn5 OS=Schizosaccharomyces pombe (strain 972 / ATCC 24843) GN=rpn5a PE=1 SV=1	230	12	C	850.689	965.146	928.737	973.102
sp|P87239|MDJ1_SCHPO	mdj1	DnaJ homolog 1, mitochondrial OS=Schizosaccharomyces pombe (strain 972 / ATCC 24843) GN=mdj1 PE=3 SV=1	179	12	C	699.492	863.871	715.966	751.297
sp|O74445|PRS10_SCHPO	rpt4	Probable 26S protease subunit rpt4 OS=Schizosaccharomyces pombe (strain 972 / ATCC 24843) GN=rpt4 PE=3 SV=2	284	12	C	696.695	635.728	908.483	966.36
sp|O74352|HOB1_SCHPO	hob1	Protein hob1 OS=Schizosaccharomyces pombe (strain 972 / ATCC 24843) GN=hob1 PE=1 SV=1	127	12	C	719.363	701.478	822.096	885.346
sp|Q09756|HXK1_SCHPO	hxk1	Hexokinase-1 OS=Schizosaccharomyces pombe (strain 972 / ATCC 24843) GN=hxk1 PE=2 SV=1	714	12	C	539.218	577.09	549.575	605.151
sp|O59711|LYS9_SCHPO	lys9	Saccharopine dehydrogenase [NADP(+), L-glutamate-forming] OS=Schizosaccharomyces pombe (strain 972 / ATCC 24843) GN=lys9 PE=3 SV=1	125	12	C	449.268	337.248	402.048	445.457
sp|P78753|ASNS_SCHPO	asn1	Probable asparagine synthetase [glutamine-hydrolyzing] OS=Schizosaccharomyces pombe (strain 972 / ATCC 24843) GN=asn1 PE=1 SV=3	679	12	C	677.974	691.829	667.409	741.098
sp|Q09916|HAS1_SCHPO	has1	ATP-dependent RNA helicase has1 OS=Schizosaccharomyces pombe (strain 972 / ATCC 24843) GN=has1 PE=1 SV=1	852	12	C	970.51	870.851	1065.74	1201.08
sp|Q9Y823|HOSM_SCHPO	lys4	Homocitrate synthase, mitochondrial OS=Schizosaccharomyces pombe (strain 972 / ATCC 24843) GN=lys4 PE=1 SV=1	314	12	C	858.338	847.383	656.737	760.553
sp|O14049|RS8A_SCHPO	rps8a	40S ribosomal protein S8-A OS=Schizosaccharomyces pombe (strain 972 / ATCC 24843) GN=rps8a PE=3 SV=1	566	12	C	640.451	724.975	743.742	867.948
sp|O94609|UBA1_SCHPO	ptr3	Ubiquitin-activating enzyme E1 1 OS=Schizosaccharomyces pombe (strain 972 / ATCC 24843) GN=ptr3 PE=1 SV=1	740	12	C	356.909	273.531	398.456	471.551
sp|Q10192|RL18A_SCHPO	rpl18a	60S ribosomal protein L18-A OS=Schizosaccharomyces pombe (strain 972 / ATCC 24843) GN=rpl18a PE=1 SV=1	239	11	C	657.096	693.284	1532.47	952.867
sp|O14150|RS14_SCHPO	rps14a	40S ribosomal protein S14 OS=Schizosaccharomyces pombe (strain 972 / ATCC 24843) GN=rps14a PE=1 SV=1	547	11	C	662.85	668.624	746.553	620.38
sp|O00087|DLDH_SCHPO	dld1	Dihydrolipoyl dehydrogenase, mitochondrial OS=Schizosaccharomyces pombe (strain 972 / ATCC 24843) GN=dld1 PE=2 SV=2	129	11	C	915.167	867.074	686.8	583.152
sp|P17937|RL7A_SCHPO	rpl7a	60S ribosomal protein L7-A OS=Schizosaccharomyces pombe (strain 972 / ATCC 24843) GN=rpl7a PE=3 SV=1	166	11	C	488.933	494.966	1852.25	1615.7
sp|Q09799|KRI1_SCHPO	kri1	Protein kri1 OS=Schizosaccharomyces pombe (strain 972 / ATCC 24843) GN=kri1 PE=1 SV=1	636	11	C	1410.11	992.187	962.627	845.142
sp|Q9URY0|YTM1_SCHPO	ytm1	Ribosome biogenesis protein ytm1 OS=Schizosaccharomyces pombe (strain 972 / ATCC 24843) GN=ytm1 PE=1 SV=1	562	11	C	692.521	569.282	1420.17	1257.45
sp|O42945|DHX15_SCHPO	prp43	Probable pre-mRNA-splicing factor ATP-dependent RNA helicase prp43 OS=Schizosaccharomyces pombe (strain 972 / ATCC 24843) GN=prp43 PE=3 SV=1	138	11	C	780	740.062	699.885	622.854
sp|O14008|CAM2_SCHPO	cam2	Myosin 1 light chain cam2 OS=Schizosaccharomyces pombe (strain 972 / ATCC 24843) GN=cam2 PE=1 SV=1	687	11	C	4040.64	3315.64	338.746	317.647
sp|Q9USZ6|MRT4_SCHPO	mrt4	Ribosome assembly factor mrt4 OS=Schizosaccharomyces pombe (strain 972 / ATCC 24843) GN=mrt4 PE=3 SV=1	229	11	C	229.075	169.811	1785.25	1679.62
sp|O60084|TIM44_SCHPO	tim44	Mitochondrial import inner membrane translocase subunit tim44 OS=Schizosaccharomyces pombe (strain 972 / ATCC 24843) GN=tim44 PE=3 SV=1	388	11	C	565.451	497.457	723.439	682.637
sp|Q9Y700|EFTU_SCHPO	tuf1	Elongation factor Tu, mitochondrial OS=Schizosaccharomyces pombe (strain 972 / ATCC 24843) GN=tuf1 PE=3 SV=1	505	11	C	899.425	1406.95	1061.99	1028.6
sp|P41891|GAR2_SCHPO	gar2	Protein gar2 OS=Schizosaccharomyces pombe (strain 972 / ATCC 24843) GN=gar2 PE=1 SV=2	156	11	C	4198.67	3940.12	1006.24	1032.15
sp|P87140|COPG_SCHPO	sec21	Probable coatomer subunit gamma OS=Schizosaccharomyces pombe (strain 972 / ATCC 24843) GN=sec21 PE=1 SV=1	78	11	C	633.645	629.167	625.892	649.949
sp|O60155|PRS1_SCHPO	prs1	Putative proline--tRNA ligase C19C7.06 OS=Schizosaccharomyces pombe (strain 972 / ATCC 24843) GN=prs1 PE=3 SV=1	268	11	C	494.877	574.687	549.708	572.024
sp|O13820|ERG5_SCHPO	erg5	Cytochrome P450 61 OS=Schizosaccharomyces pombe (strain 972 / ATCC 24843) GN=erg5 PE=1 SV=3	204	11	C	736.472	786.81	749.188	803.829
sp|Q9UT50|YFR3_SCHPO	SPAC821.03c	Uncharacterized protein C821.03c OS=Schizosaccharomyces pombe (strain 972 / ATCC 24843) GN=SPAC821.03c PE=1 SV=1	554	11	C	1399.11	1470.43	441.587	491.331
sp|P36623|PMGY_SCHPO	gpm1	Phosphoglycerate mutase OS=Schizosaccharomyces pombe (strain 972 / ATCC 24843) GN=gpm1 PE=1 SV=1	372	11	C	1168.52	1001.4	692.677	796.79
sp|P40375|MAOX_SCHPO	mae2	NAD-dependent malic enzyme OS=Schizosaccharomyces pombe (strain 972 / ATCC 24843) GN=mae2 PE=1 SV=1	65	11	C	762.943	900.06	654.405	787.124
sp|Q09127|RL10A_SCHPO	rpl10a	60S ribosomal protein L10-A OS=Schizosaccharomyces pombe (strain 972 / ATCC 24843) GN=rpl10a PE=2 SV=2	283	10	C	647.128	518.88	877.913	641.095
sp|Q9HGL6|BRX1_SCHPO	brx1	Ribosome biogenesis protein brx1 OS=Schizosaccharomyces pombe (strain 972 / ATCC 24843) GN=brx1 PE=3 SV=1	467	10	C	1876.42	1413.07	1564.57	1246.77
sp|O74378|ODO1_SCHPO	kgd1	2-oxoglutarate dehydrogenase, mitochondrial OS=Schizosaccharomyces pombe (strain 972 / ATCC 24843) GN=kgd1 PE=3 SV=1	1235	10	C	968.417	1052.62	1019.76	830.929
sp|O13791|SLT1_SCHPO	slt1	Protein slt1 OS=Schizosaccharomyces pombe (strain 972 / ATCC 24843) GN=slt1 PE=1 SV=3	1157	10	C	491.797	532.852	494.081	437.204
sp|O13792|SUB2_SCHPO	uap56	ATP-dependent RNA helicase uap56 OS=Schizosaccharomyces pombe (strain 972 / ATCC 24843) GN=uap56 PE=1 SV=3	718	10	C	1078.17	971.536	1336.87	1221.08
sp|O74905|RL9B_SCHPO	rpl9b	60S ribosomal protein L9-B OS=Schizosaccharomyces pombe (strain 972 / ATCC 24843) GN=rpl9b PE=3 SV=1	663	10	C	502.082	531.978	1349.57	1249.73
sp|O14157|MYO3_SCHPO	myo3	Myosin type-2 heavy chain 2 OS=Schizosaccharomyces pombe (strain 972 / ATCC 24843) GN=myo3 PE=1 SV=1	604	10	C	3131.4	2304.52	834.785	782.291
sp|O94715|RS15A_SCHPO	rps15a	40S ribosomal protein S15-A OS=Schizosaccharomyces pombe (strain 972 / ATCC 24843) GN=rps15a PE=3 SV=1	1201	10	C	860.17	755.526	1066.17	1003.97
sp|O94268|NOP2_SCHPO	SPBP8B7.20c	25S rRNA (cytosine-C(5))-methyltransferase nop2 OS=Schizosaccharomyces pombe (strain 972 / ATCC 24843) GN=SPBP8B7.20c PE=1 SV=1	672	10	C	455.976	432.669	490.113	464.442
sp|O42700|TAL1_SCHPO	tal1	Transaldolase OS=Schizosaccharomyces pombe (strain 972 / ATCC 24843) GN=tal1 PE=1 SV=2	526	10	C	478.741	473.576	506.222	480.201
sp|O14295|PLR1_SCHPO	plr1	Pyridoxal reductase OS=Schizosaccharomyces pombe (strain 972 / ATCC 24843) GN=plr1 PE=1 SV=1	272	10	C	309.247	324.912	313.446	298.86
sp|P79063|ERF1_SCHPO	sup45	Eukaryotic peptide chain release factor subunit 1 OS=Schizosaccharomyces pombe (strain 972 / ATCC 24843) GN=sup45 PE=1 SV=1	821	10	C	861.017	899.563	1133.16	1089.37
sp|O42897|RPN3_SCHPO	rpn3	Probable 26S proteasome regulatory subunit rpn3 OS=Schizosaccharomyces pombe (strain 972 / ATCC 24843) GN=rpn3 PE=3 SV=2	769	10	C	397.302	570.04	575.445	553.406
sp|O60188|UTP6_SCHPO	utp6	U3 small nucleolar RNA-associated protein 6 OS=Schizosaccharomyces pombe (strain 972 / ATCC 24843) GN=utp6 PE=3 SV=1	664	10	C	616.909	699.424	557.958	537.659
sp|Q9UU76|PUF6_SCHPO	puf6	Pumilio homology domain family member 6 OS=Schizosaccharomyces pombe (strain 972 / ATCC 24843) GN=puf6 PE=1 SV=1	423	10	C	1028.09	868.795	1294.5	1247.97
sp|Q9P7D4|ACON2_SCHPO	SPBP4H10.15	Homocitrate dehydratase, mitochondrial OS=Schizosaccharomyces pombe (strain 972 / ATCC 24843) GN=SPBP4H10.15 PE=3 SV=3	747	10	C	705.683	762.908	985.675	955.293
sp|O42848|RL16A_SCHPO	rpl16a	60S ribosomal protein L16-A OS=Schizosaccharomyces pombe (strain 972 / ATCC 24843) GN=rpl16a PE=1 SV=1	895	10	C	697.751	688.514	1362.83	1323.96
sp|O94529|POB3_SCHPO	pob3	FACT complex subunit pob3 OS=Schizosaccharomyces pombe (strain 972 / ATCC 24843) GN=pob3 PE=3 SV=1	531	10	C	498.827	555.712	721.555	703.684
sp|P05767|RL39_SCHPO	rpl39	60S ribosomal protein L39 OS=Schizosaccharomyces pombe (strain 972 / ATCC 24843) GN=rpl39 PE=3 SV=3	1550	10	C	737.479	731.513	1273.02	1242.02
sp|P40387|TPS1_SCHPO	tps1	Alpha,alpha-trehalose-phosphate synthase [UDP-forming] OS=Schizosaccharomyces pombe (strain 972 / ATCC 24843) GN=tps1 PE=1 SV=2	55	10	C	467.585	506.167	550.497	539.637
sp|Q9UUM7|HOB3_SCHPO	hob3	Protein hob3 OS=Schizosaccharomyces pombe (strain 972 / ATCC 24843) GN=hob3 PE=1 SV=1	700	10	C	1573.01	1637.76	886.86	870.319
sp|O14293|YF19_SCHPO	SPAC9E9.09c	Putative aldehyde dehydrogenase-like protein C9E9.09c OS=Schizosaccharomyces pombe (strain 972 / ATCC 24843) GN=SPAC9E9.09c PE=1 SV=1	25	10	C	384.071	379.52	470.114	463.611
sp|O14081|TPSX_SCHPO	SPAC2E11.16c	Putative alpha,alpha-trehalose-phosphate synthase [UDP-forming] 106 kDa subunit OS=Schizosaccharomyces pombe (strain 972 / ATCC 24843) GN=SPAC2E11.16c PE=1 SV=1	1014	10	C	251.6	397.124	300.823	297.681
sp|O59797|YCO6_SCHPO	SPCC364.06	Putative nucleosome assembly protein C364.06 OS=Schizosaccharomyces pombe (strain 972 / ATCC 24843) GN=SPCC364.06 PE=1 SV=1	470	10	C	695.165	673.515	910.159	912.899
sp|Q10335|RPN7_SCHPO	rpn7	Probable 26S proteasome regulatory subunit rpn7 OS=Schizosaccharomyces pombe (strain 972 / ATCC 24843) GN=rpn7 PE=2 SV=1	354	10	C	776.852	879.563	719.13	723.247
sp|Q09912|PSI1_SCHPO	psi1	Protein psi1 OS=Schizosaccharomyces pombe (strain 972 / ATCC 24843) GN=psi1 PE=2 SV=2	886	10	C	359.383	458.978	426.506	434.489
sp|O75000|RL12_SCHPO	rpl1201	60S ribosomal protein L12 OS=Schizosaccharomyces pombe (strain 972 / ATCC 24843) GN=rpl1201 PE=1 SV=1	582	10	C	685.62	605.366	1016.74	1049.44
sp|P04688|TBA1_SCHPO	nda2	Tubulin alpha-1 chain OS=Schizosaccharomyces pombe (strain 972 / ATCC 24843) GN=nda2 PE=3 SV=2	218	10	C	631.495	625.001	727.82	752.896
sp|O60055|UTP20_SCHPO	utp20	U3 small nucleolar RNA-associated protein 20 OS=Schizosaccharomyces pombe (strain 972 / ATCC 24843) GN=utp20 PE=3 SV=1	184	10	C	608.153	666.681	636.674	661.489
sp|O74475|BGS4_SCHPO	bgs4	1,3-beta-glucan synthase component bgs4 OS=Schizosaccharomyces pombe (strain 972 / ATCC 24843) GN=bgs4 PE=1 SV=1	741	10	C	1986.53	1534.3	705.324	737.365
sp|O74762|RPN2_SCHPO	rpn2	26S proteasome regulatory subunit rpn2 OS=Schizosaccharomyces pombe (strain 972 / ATCC 24843) GN=rpn2 PE=1 SV=1	456	10	C	531.908	615.149	754.093	788.841
sp|P87153|TCPH_SCHPO	cct7	Probable T-complex protein 1 subunit eta OS=Schizosaccharomyces pombe (strain 972 / ATCC 24843) GN=cct7 PE=1 SV=1	481	10	C	530.715	586.801	579.123	612.442
sp|P0C016|RS27A_SCHPO	ubi3	Ubiquitin-40S ribosomal protein S27a OS=Schizosaccharomyces pombe (strain 972 / ATCC 24843) GN=ubi3 PE=1 SV=2	949	10	C	1560.83	1194.67	1108.03	1192.41
sp|O74884|RL24B_SCHPO	rpl24b	60S ribosomal protein L24-B OS=Schizosaccharomyces pombe (strain 972 / ATCC 24843) GN=rpl24b PE=1 SV=1	1192	10	C	762.981	817.517	977.41	1063.34
sp|O59809|IMA3_SCHPO	SPCC550.11	Probable importin c550.11 OS=Schizosaccharomyces pombe (strain 972 / ATCC 24843) GN=SPCC550.11 PE=3 SV=1	781	10	C	373.503	397.188	408.84	446.574
sp|O14344|IMDH_SCHPO	gua1	Inosine-5'-monophosphate dehydrogenase OS=Schizosaccharomyces pombe (strain 972 / ATCC 24843) GN=gua1 PE=2 SV=1	651	10	C	430.442	545.854	437.549	480.268
sp|P36581|CALX_SCHPO	cal1	Calnexin homolog OS=Schizosaccharomyces pombe (strain 972 / ATCC 24843) GN=cal1 PE=1 SV=1	465	10	C	469.474	478.508	519.99	573.526
sp|Q9UT00|YKH3_SCHPO	SPAPYUK71.03c	Uncharacterized protein PYUK71.03c OS=Schizosaccharomyces pombe (strain 972 / ATCC 24843) GN=SPAPYUK71.03c PE=1 SV=1	685	10	C	416.837	615.668	516.734	573.929
sp|O74985|NAT1_SCHPO	nat1	N-terminal acetyltransferase A complex subunit nat1 OS=Schizosaccharomyces pombe (strain 972 / ATCC 24843) GN=nat1 PE=1 SV=1	302	10	C	568.398	677.834	609.544	711.387
sp|Q9P7L5|OAT_SCHPO	car2	Ornithine aminotransferase car2 OS=Schizosaccharomyces pombe (strain 972 / ATCC 24843) GN=car2 PE=2 SV=1	80	10	C	463.38	878.389	422.012	512.299
sp|Q9URZ5|VPS1_SCHPO	vps1	Vacuolar protein sorting-associated protein 1 OS=Schizosaccharomyces pombe (strain 972 / ATCC 24843) GN=vps1 PE=3 SV=2	404	10	C	698.882	707.355	898.514	1185.32
sp|O74904|RL35_SCHPO	rpl35	60S ribosomal protein L35 OS=Schizosaccharomyces pombe (strain 972 / ATCC 24843) GN=rpl35 PE=1 SV=1	406	9	C	1305.64	845.217	2569.81	1791.4
sp|P78750|UTP18_SCHPO	SPBC29A3.06	Probable U3 small nucleolar RNA-associated protein 18 OS=Schizosaccharomyces pombe (strain 972 / ATCC 24843) GN=SPBC29A3.06 PE=2 SV=3	627	9	C	1222.9	919.863	848.768	621.511
sp|P42657|RAD25_SCHPO	rad25	DNA damage checkpoint protein rad25 OS=Schizosaccharomyces pombe (strain 972 / ATCC 24843) GN=rad25 PE=1 SV=1	66	9	C	1139.45	743.108	995.373	744.508
sp|Q92365|RL36A_SCHPO	rpl36a	60S ribosomal protein L36-A OS=Schizosaccharomyces pombe (strain 972 / ATCC 24843) GN=rpl36a PE=3 SV=2	1053	9	C	389.094	451.713	861.896	668.283
sp|O94681|ODO2_SCHPO	kgd2	Probable dihydrolipoyllysine-residue succinyltransferase component of 2-oxoglutarate dehydrogenase complex, mitochondrial OS=Schizosaccharomyces pombe (strain 972 / ATCC 24843) GN=kgd2 PE=3 SV=1	542	9	C	1399.68	1101.13	1453.98	1191.03
sp|P17476|RLA1_SCHPO	rpa1	60S acidic ribosomal protein P1-alpha 1 OS=Schizosaccharomyces pombe (strain 972 / ATCC 24843) GN=rpa1 PE=3 SV=1	54	9	C	1000.41	897.616	1019.4	846.778
sp|Q9P782|YNY8_SCHPO	SPBC1711.08	Uncharacterized protein C1711.08 OS=Schizosaccharomyces pombe (strain 972 / ATCC 24843) GN=SPBC1711.08 PE=2 SV=1	1119	9	C	424.398	412.798	612.177	509.897
sp|P79013|RS11_SCHPO	rps11a	40S ribosomal protein S11 OS=Schizosaccharomyces pombe (strain 972 / ATCC 24843) GN=rps11a PE=2 SV=2	843	9	C	422.638	364.538	717.375	611.422
sp|O42893|TREA_SCHPO	ntp1	Neutral trehalase OS=Schizosaccharomyces pombe (strain 972 / ATCC 24843) GN=ntp1 PE=1 SV=1	158	9	C	337.903	371.828	377.683	328.955
sp|O13802|EBP2_SCHPO	ebp2	Probable rRNA-processing protein ebp2 OS=Schizosaccharomyces pombe (strain 972 / ATCC 24843) GN=ebp2 PE=1 SV=1	891	9	C	835.495	773.158	850.184	742.959
sp|P36585|RL28A_SCHPO	rpl28a	60S ribosomal protein L28-A OS=Schizosaccharomyces pombe (strain 972 / ATCC 24843) GN=rpl28a PE=3 SV=3	240	9	C	1091.68	1244.33	2159.97	1892.99
sp|O74400|YOCE_SCHPO	SPBC4F6.14	Uncharacterized RNA-binding protein C4F6.14 OS=Schizosaccharomyces pombe (strain 972 / ATCC 24843) GN=SPBC4F6.14 PE=1 SV=1	618	9	C	904.381	732.059	787.359	702.498
sp|O94567|SYNC_SCHPO	nrs1	Probable asparagine--tRNA ligase, cytoplasmic OS=Schizosaccharomyces pombe (strain 972 / ATCC 24843) GN=nrs1 PE=3 SV=1	13	9	C	857.589	679.631	655.739	586.867
sp|P56288|EI2BG_SCHPO	tif223	Probable translation initiation factor eIF-2B subunit gamma OS=Schizosaccharomyces pombe (strain 972 / ATCC 24843) GN=tif223 PE=1 SV=2	447	9	C	853.148	738.09	831.648	747.932
sp|O74887|TSA1_SCHPO	tpx1	Peroxiredoxin tpx1 OS=Schizosaccharomyces pombe (strain 972 / ATCC 24843) GN=tpx1 PE=1 SV=1	870	9	C	1301.71	1349.23	853.444	772.757
sp|Q96WW3|YNH5_SCHPO	SPBC32H8.05	UPF0642 protein C32H8.05 OS=Schizosaccharomyces pombe (strain 972 / ATCC 24843) GN=SPBC32H8.05 PE=3 SV=1	804	9	C	203.905	166.787	1135.72	1029.68
sp|Q9UUE1|PYC_SCHPO	pyr1	Pyruvate carboxylase OS=Schizosaccharomyces pombe (strain 972 / ATCC 24843) GN=pyr1 PE=3 SV=1	33	9	C	607.761	489.449	537.721	495.459
sp|O94438|RS3A2_SCHPO	rps102	40S ribosomal protein S1-B OS=Schizosaccharomyces pombe (strain 972 / ATCC 24843) GN=rps102 PE=1 SV=3	453	9	C	869.405	875.268	1284.97	1187.55
sp|Q01475|SAR1_SCHPO	sar1	Small COPII coat GTPase sar1 OS=Schizosaccharomyces pombe (strain 972 / ATCC 24843) GN=sar1 PE=1 SV=1	44	9	C	883.136	726.415	953.491	889.331
sp|O74557|NCB5R_SCHPO	cbr1	NADH-cytochrome b5 reductase 1 OS=Schizosaccharomyces pombe (strain 972 / ATCC 24843) GN=cbr1 PE=3 SV=1	278	9	C	771.802	639.419	937.557	887.934
sp|P36587|NCPR_SCHPO	ccr1	NADPH--cytochrome P450 reductase OS=Schizosaccharomyces pombe (strain 972 / ATCC 24843) GN=ccr1 PE=2 SV=1	477	9	C	572.999	474.333	652.91	624.609
sp|O59725|MIC60_SCHPO	mic60	MICOS complex subunit mic60 OS=Schizosaccharomyces pombe (strain 972 / ATCC 24843) GN=mic60 PE=3 SV=1	375	9	C	424.138	462.783	562.976	540.01
sp|O59866|OSTB_SCHPO	wbp1	Dolichyl-diphosphooligosaccharide--protein glycosyltransferase subunit wbp1 OS=Schizosaccharomyces pombe (strain 972 / ATCC 24843) GN=wbp1 PE=2 SV=2	670	9	C	599.856	641.867	661.818	639.119
sp|O94513|EIF3E_SCHPO	int6	Eukaryotic translation initiation factor 3 subunit E OS=Schizosaccharomyces pombe (strain 972 / ATCC 24843) GN=int6 PE=1 SV=1	831	9	C	769.219	574.891	726.478	701.985
sp|P18869|LEU3_SCHPO	leu1	3-isopropylmalate dehydrogenase OS=Schizosaccharomyces pombe (strain 972 / ATCC 24843) GN=leu1 PE=1 SV=1	452	9	C	679.553	511.852	688.393	666.544
sp|Q9USP0|EI2BA_SCHPO	tif221	Translation initiation factor eIF-2B subunit alpha OS=Schizosaccharomyces pombe (strain 972 / ATCC 24843) GN=tif221 PE=3 SV=1	1239	9	C	591.881	530.523	817.099	793.676
sp|O94582|TRPE_SCHPO	trp3	Probable anthranilate synthase component 1 OS=Schizosaccharomyces pombe (strain 972 / ATCC 24843) GN=trp3 PE=1 SV=1	219	9	C	604.435	560.507	609.721	593.624
sp|P22068|ATPB_SCHPO	atp2	ATP synthase subunit beta, mitochondrial OS=Schizosaccharomyces pombe (strain 972 / ATCC 24843) GN=atp2 PE=1 SV=1	953	9	C	588.534	564.673	683.002	669.616
sp|O43051|NOP14_SCHPO	nop14	Probable nucleolar complex protein 14 OS=Schizosaccharomyces pombe (strain 972 / ATCC 24843) GN=nop14 PE=1 SV=1	871	9	C	912.522	893.958	730.441	725.584
sp|O13741|NOP12_SCHPO	nop12	Nucleolar protein 12 OS=Schizosaccharomyces pombe (strain 972 / ATCC 24843) GN=nop12 PE=1 SV=1	253	9	C	969.851	964.005	782.609	789.019
sp|O13651|SYIC_SCHPO	irs1	Isoleucine--tRNA ligase, cytoplasmic OS=Schizosaccharomyces pombe (strain 972 / ATCC 24843) GN=irs1 PE=3 SV=1	385	9	C	647.04	586.325	544.991	551.33
sp|Q9P380|PTR2_SCHPO	ptr2	Probable peptide transporter ptr2 OS=Schizosaccharomyces pombe (strain 972 / ATCC 24843) GN=ptr2 PE=1 SV=1	97	9	C	307.221	355.837	367.257	371.561
sp|P14068|XPO1_SCHPO	xpo1	Exportin-1 OS=Schizosaccharomyces pombe (strain 972 / ATCC 24843) GN=xpo1 PE=1 SV=3	429	9	C	362.623	297.836	588.409	602.575
sp|P15567|PUR6_SCHPO	ade6	Phosphoribosylaminoimidazole carboxylase OS=Schizosaccharomyces pombe (strain 972 / ATCC 24843) GN=ade6 PE=3 SV=1	260	9	C	928.103	842.207	893.02	923.276
sp|O60198|METK_SCHPO	sam1	S-adenosylmethionine synthase OS=Schizosaccharomyces pombe (strain 972 / ATCC 24843) GN=sam1 PE=3 SV=1	358	9	C	727.199	591.53	498.545	516.314
sp|O74970|PRP39_SCHPO	prp39	Pre-mRNA-processing factor 39 OS=Schizosaccharomyces pombe (strain 972 / ATCC 24843) GN=prp39 PE=3 SV=1	979	9	C	675.348	712.109	375.818	390.937
sp|O60163|AK_SCHPO	SPBC19F5.04	Probable aspartokinase OS=Schizosaccharomyces pombe (strain 972 / ATCC 24843) GN=SPBC19F5.04 PE=1 SV=1	797	9	C	1005.27	655.511	901.092	945.227
sp|Q9P7S2|RPN6_SCHPO	rpn6	Probable 26S proteasome regulatory subunit rpn6 OS=Schizosaccharomyces pombe (strain 972 / ATCC 24843) GN=rpn6 PE=3 SV=1	288	9	C	476.206	472.889	525.426	557.669
sp|P07669|TPIS_SCHPO	tpi1	Triosephosphate isomerase OS=Schizosaccharomyces pombe (strain 972 / ATCC 24843) GN=tpi1 PE=1 SV=4	708	9	C	324.802	291.402	399.918	429.051
sp|Q9P772|GUAA_SCHPO	gua1	GMP synthase [glutamine-hydrolyzing] OS=Schizosaccharomyces pombe (strain 972 / ATCC 24843) GN=gua1 PE=3 SV=1	335	9	C	501.688	574.63	572.145	614.806
sp|Q02061|RPB2_SCHPO	rpb2	DNA-directed RNA polymerase II subunit RPB2 OS=Schizosaccharomyces pombe (strain 972 / ATCC 24843) GN=rpb2 PE=1 SV=2	60	9	C	627.447	675.655	605.829	653.663
sp|Q9UUC1|RL21A_SCHPO	rpl21a	60S ribosomal protein L21-A OS=Schizosaccharomyces pombe (strain 972 / ATCC 24843) GN=rpl21a PE=3 SV=1	279	9	C	375.452	296.144	1368.48	1477.13
sp|O43030|FES1_SCHPO	fes1	Hsp70 nucleotide exchange factor fes1 OS=Schizosaccharomyces pombe (strain 972 / ATCC 24843) GN=fes1 PE=1 SV=1	187	9	C	258.974	257.161	315.192	343.99
sp|O74919|RNC1_SCHPO	rnc1	RNA-binding protein rnc1 OS=Schizosaccharomyces pombe (strain 972 / ATCC 24843) GN=rnc1 PE=1 SV=1	366	9	C	830.815	1013.8	778.251	861.35
sp|O94267|SPT16_SCHPO	spt16	FACT complex subunit spt16 OS=Schizosaccharomyces pombe (strain 972 / ATCC 24843) GN=spt16 PE=1 SV=1	935	9	C	697.326	738.075	797.137	884.351
sp|Q9P544|VDAC_SCHPO	SPAC1635.01	Probable mitochondrial outer membrane protein porin OS=Schizosaccharomyces pombe (strain 972 / ATCC 24843) GN=SPAC1635.01 PE=3 SV=1	249	9	C	656.29	594.523	738.15	833.555
sp|O13784|RS24A_SCHPO	rps24a	40S ribosomal protein S24-A OS=Schizosaccharomyces pombe (strain 972 / ATCC 24843) GN=rps24a PE=3 SV=3	1548	9	C	838.793	908.598	1036.53	1195.22
sp|Q09736|CP51_SCHPO	erg11	Lanosterol 14-alpha demethylase erg11 OS=Schizosaccharomyces pombe (strain 972 / ATCC 24843) GN=erg11 PE=1 SV=1	753	9	C	328.202	283.072	506.758	597.409
sp|Q9Y7L8|RSSA1_SCHPO	rps0a	40S ribosomal protein S0-A OS=Schizosaccharomyces pombe (strain 972 / ATCC 24843) GN=rps0a PE=1 SV=1	787	9	C	708.966	789.607	857.571	1086.38
sp|Q9P370|BUD20_SCHPO	bud20	Zinc finger protein bud20 OS=Schizosaccharomyces pombe (strain 972 / ATCC 24843) GN=bud20 PE=3 SV=1	733	8	C	185.46	80.9595	1366.64	789.156
sp|Q10330|RL25A_SCHPO	rpl25a	60S ribosomal protein L25-A OS=Schizosaccharomyces pombe (strain 972 / ATCC 24843) GN=rpl25a PE=1 SV=1	1277	8	C	441.372	337.743	761.477	546.84
sp|O42984|RS17A_SCHPO	rps17a	40S ribosomal protein S17-A OS=Schizosaccharomyces pombe (strain 972 / ATCC 24843) GN=rps17a PE=3 SV=1	370	8	C	648.643	330.04	1084.47	822.227
sp|Q09668|RL22_SCHPO	rpl22	60S ribosomal protein L22 OS=Schizosaccharomyces pombe (strain 972 / ATCC 24843) GN=rpl22 PE=1 SV=3	1264	8	C	652.243	589.898	1580.48	1321.42
sp|Q9UUE6|SYKC_SCHPO	krs1	Lysine--tRNA ligase, cytoplasmic OS=Schizosaccharomyces pombe (strain 972 / ATCC 24843) GN=krs1 PE=3 SV=1	64	8	C	781.799	924.115	906.279	769.365
sp|O13724|ZPR1_SCHPO	zpr1	Zinc finger protein zpr1 OS=Schizosaccharomyces pombe (strain 972 / ATCC 24843) GN=zpr1 PE=3 SV=1	1022	8	C	926.617	943.872	877.782	749.269
sp|Q09689|IF5_SCHPO	SPAC2F7.05c	Probable eukaryotic translation initiation factor 5 OS=Schizosaccharomyces pombe (strain 972 / ATCC 24843) GN=SPAC2F7.05c PE=3 SV=1	369	8	C	760.783	567.307	650.439	571.211
sp|O13870|NOT3_SCHPO	not3	General negative regulator of transcription subunit 3 OS=Schizosaccharomyces pombe (strain 972 / ATCC 24843) GN=not3 PE=1 SV=2	761	8	C	474.73	422.301	426.934	378.777
sp|Q9USX4|RL33A_SCHPO	rpl33a	60S ribosomal protein L33-A OS=Schizosaccharomyces pombe (strain 972 / ATCC 24843) GN=rpl33a PE=3 SV=2	916	8	C	711.567	769.939	1042.83	933.05
sp|Q09181|DHH1_SCHPO	ste13	Putative ATP-dependent RNA helicase ste13 OS=Schizosaccharomyces pombe (strain 972 / ATCC 24843) GN=ste13 PE=3 SV=1	1230	8	C	663.762	700.826	809.959	731.56
sp|Q09903|DRS1_SCHPO	drs1	ATP-dependent RNA helicase drs1 OS=Schizosaccharomyces pombe (strain 972 / ATCC 24843) GN=drs1 PE=3 SV=1	333	8	C	434.674	354.081	454.996	414.714
sp|Q10175|FKBPH_SCHPO	SPAC27F1.06c	Probable peptidyl-prolyl cis-trans isomerase C27F1.06c OS=Schizosaccharomyces pombe (strain 972 / ATCC 24843) GN=SPAC27F1.06c PE=1 SV=1	931	8	C	534.657	373.659	572.977	524.795
sp|O60094|DPO5_SCHPO	pol5	DNA polymerase V OS=Schizosaccharomyces pombe (strain 972 / ATCC 24843) GN=pol5 PE=1 SV=2	548	8	C	686.883	629.647	633.159	591.878
sp|O60085|MAP2_SCHPO	fma2	Methionine aminopeptidase 2 OS=Schizosaccharomyces pombe (strain 972 / ATCC 24843) GN=fma2 PE=3 SV=1	412	8	C	356.924	453.055	424.738	403.673
sp|O13849|CBPY_SCHPO	cpy1	Carboxypeptidase Y OS=Schizosaccharomyces pombe (strain 972 / ATCC 24843) GN=cpy1 PE=1 SV=1	202	8	C	747.396	694.616	620.739	591.404
sp|Q9P7H3|PHB1_SCHPO	phb1	Prohibitin-1 OS=Schizosaccharomyces pombe (strain 972 / ATCC 24843) GN=phb1 PE=3 SV=1	146	8	C	633.742	648.294	758.342	722.858
sp|O42849|SYFB_SCHPO	frs1	Phenylalanine--tRNA ligase beta subunit OS=Schizosaccharomyces pombe (strain 972 / ATCC 24843) GN=frs1 PE=3 SV=1	807	8	C	416.05	484.848	427.869	408.527
sp|O13718|VTC2_SCHPO	vtc2	Vacuolar transporter chaperone 2 OS=Schizosaccharomyces pombe (strain 972 / ATCC 24843) GN=vtc2 PE=1 SV=1	1133	8	C	899.601	997.974	1039.49	1008.39
sp|Q9US05|BFR2_SCHPO	bfr2	Protein bfr2 OS=Schizosaccharomyces pombe (strain 972 / ATCC 24843) GN=bfr2 PE=1 SV=1	379	8	C	966.647	917.293	639.809	623.964
sp|Q9HGP5|CAPZB_SCHPO	acp2	F-actin-capping protein subunit beta OS=Schizosaccharomyces pombe (strain 972 / ATCC 24843) GN=acp2 PE=1 SV=1	709	8	C	387.566	816.722	289.48	282.456
sp|O14023|ELP3_SCHPO	elp3	Probable elongator complex protein 3 OS=Schizosaccharomyces pombe (strain 972 / ATCC 24843) GN=elp3 PE=3 SV=1	706	8	C	288.108	236.046	380.941	373.902
sp|Q9P7G0|YKY4_SCHPO	SPAC1142.04	Uncharacterized NOC2 family protein C1142.04 OS=Schizosaccharomyces pombe (strain 972 / ATCC 24843) GN=SPAC1142.04 PE=1 SV=1	3	8	C	665.599	764.782	537.478	536.456
sp|O59787|SRP72_SCHPO	srp72	Signal recognition particle subunit srp72 OS=Schizosaccharomyces pombe (strain 972 / ATCC 24843) GN=srp72 PE=3 SV=1	396	8	C	728.206	768.833	819.592	818.034
sp|O94374|IMA2_SCHPO	imp1	Importin subunit alpha-2 OS=Schizosaccharomyces pombe (strain 972 / ATCC 24843) GN=imp1 PE=1 SV=1	930	8	C	311.537	406.899	294.288	296.393
sp|O74777|KRR1_SCHPO	mis3	KRR1 small subunit processome component homolog OS=Schizosaccharomyces pombe (strain 972 / ATCC 24843) GN=mis3 PE=3 SV=1	192	8	C	1739.36	1485.32	1133.61	1152.54
sp|O14325|YB7A_SCHPO	SPBC16E9.10c	Uncharacterized AAA domain-containing protein C16E9.10c OS=Schizosaccharomyces pombe (strain 972 / ATCC 24843) GN=SPBC16E9.10c PE=1 SV=1	329	8	C	348.215	374.946	487.367	496.299
sp|Q9P6K7|ARC1_SCHPO	SPAC30C2.04	tRNA-aminoacylation cofactor arc1 OS=Schizosaccharomyces pombe (strain 972 / ATCC 24843) GN=SPAC30C2.04 PE=3 SV=1	76	8	C	528.253	568.687	601.988	613.81
sp|P36579|ARF1_SCHPO	arf1	ADP-ribosylation factor 1 OS=Schizosaccharomyces pombe (strain 972 / ATCC 24843) GN=arf1 PE=2 SV=2	625	8	C	353.588	574.198	465.962	475.366
sp|Q9UTK5|ALM1_SCHPO	alm1	Abnormal long morphology protein 1 OS=Schizosaccharomyces pombe (strain 972 / ATCC 24843) GN=alm1 PE=1 SV=1	829	8	C	229.276	277.355	295.495	301.714
sp|P28189|RS13_SCHPO	rps13	40S ribosomal protein S13 OS=Schizosaccharomyces pombe (strain 972 / ATCC 24843) GN=rps13 PE=1 SV=2	88	8	C	265.027	197.326	347.146	356.978
sp|P78929|COFI_SCHPO	cof1	Cofilin OS=Schizosaccharomyces pombe (strain 972 / ATCC 24843) GN=cof1 PE=1 SV=1	215	8	C	437.356	556.926	246.968	254.337
sp|P87317|YB2G_SCHPO	SPBC31F10.16	Uncharacterized protein C31F10.16 OS=Schizosaccharomyces pombe (strain 972 / ATCC 24843) GN=SPBC31F10.16 PE=4 SV=2	281	8	C	487.236	412.336	524.145	540.89
sp|Q9UT56|RS26A_SCHPO	rps26a	40S ribosomal protein S26-A OS=Schizosaccharomyces pombe (strain 972 / ATCC 24843) GN=rps26a PE=3 SV=1	759	8	C	690.415	620.767	629.341	652.405
sp|O13671|CSE1_SCHPO	kap109	Importin-alpha re-exporter OS=Schizosaccharomyces pombe (strain 972 / ATCC 24843) GN=kap109 PE=3 SV=2	1121	8	C	463.101	477.907	650.034	674.14
sp|Q09184|CDB4_SCHPO	cdb4	Curved DNA-binding protein OS=Schizosaccharomyces pombe (strain 972 / ATCC 24843) GN=cdb4 PE=1 SV=1	898	8	C	387.406	367.279	431.734	453.067
sp|P05219|TBB_SCHPO	nda3	Tubulin beta chain OS=Schizosaccharomyces pombe (strain 972 / ATCC 24843) GN=nda3 PE=1 SV=2	591	8	C	462.612	534.472	477.208	500.975
sp|O14053|UTP21_SCHPO	SPCC1672.07	U3 small nucleolar RNA-associated protein 21 homolog OS=Schizosaccharomyces pombe (strain 972 / ATCC 24843) GN=SPCC1672.07 PE=3 SV=1	802	8	C	783.651	799.111	583.561	615.594
sp|P78761|QCR2_SCHPO	qcr2	Cytochrome b-c1 complex subunit 2, mitochondrial OS=Schizosaccharomyces pombe (strain 972 / ATCC 24843) GN=qcr2 PE=2 SV=2	536	8	C	295.545	308.104	263.914	283.85
sp|Q09694|LYS1_SCHPO	lys3	Saccharopine dehydrogenase [NAD(+), L-lysine-forming] OS=Schizosaccharomyces pombe (strain 972 / ATCC 24843) GN=lys3 PE=1 SV=2	641	8	C	990.922	837.234	833.775	902.344
sp|O36025|MPD2_SCHPO	mpd2	GYF domain-containing protein mpd2 OS=Schizosaccharomyces pombe (strain 972 / ATCC 24843) GN=mpd2 PE=1 SV=1	6	8	C	235.791	277.664	311.804	337.629
sp|P78946|RL26_SCHPO	rpl26	60S ribosomal protein L26 OS=Schizosaccharomyces pombe (strain 972 / ATCC 24843) GN=rpl26 PE=3 SV=1	277	8	C	397.674	486.391	818.585	891.689
sp|O60073|YKT6_SCHPO	ykt6	Synaptobrevin homolog ykt6 OS=Schizosaccharomyces pombe (strain 972 / ATCC 24843) GN=ykt6 PE=3 SV=1	1308	8	C	399.903	608.567	416.989	461.166
sp|Q10490|SYLC_SCHPO	lrs1	Putative leucine--tRNA ligase, cytoplasmic OS=Schizosaccharomyces pombe (strain 972 / ATCC 24843) GN=lrs1 PE=1 SV=1	183	8	C	552.931	638.52	571.547	632.462
sp|P31318|ARG56_SCHPO	arg11	Protein arg11, mitochondrial OS=Schizosaccharomyces pombe (strain 972 / ATCC 24843) GN=arg11 PE=3 SV=2	95	8	C	429.216	399.013	365.228	405.866
sp|Q9P7U2|YI7E_SCHPO	SPAC977.14c	Putative aryl-alcohol dehydrogenase C977.14c OS=Schizosaccharomyces pombe (strain 972 / ATCC 24843) GN=SPAC977.14c PE=1 SV=1	359	8	C	369.276	414.633	389.82	436.941
sp|Q9UUI5|SEC24_SCHPO	sec24	Protein transport protein sec24 OS=Schizosaccharomyces pombe (strain 972 / ATCC 24843) GN=sec24 PE=2 SV=1	397	8	C	585.794	610.322	662.255	754.174
sp|Q10061|LHS1_SCHPO	SPAC1F5.06	Heat shock protein 70 homolog lhs1 OS=Schizosaccharomyces pombe (strain 972 / ATCC 24843) GN=SPAC1F5.06 PE=3 SV=1	161	8	C	222.596	265.105	255.364	291.65
sp|O36027|WSP1_SCHPO	wsp1	Wiskott-Aldrich syndrome protein homolog 1 OS=Schizosaccharomyces pombe (strain 972 / ATCC 24843) GN=wsp1 PE=1 SV=3	506	8	C	4419.85	2599.92	719.782	828.961
sp|Q9URW6|YIE2_SCHPO	SPAPJ696.02	SH3 domain-containing protein PJ696.02 OS=Schizosaccharomyces pombe (strain 972 / ATCC 24843) GN=SPAPJ696.02 PE=1 SV=1	83	8	C	4066.57	2826.28	551.375	706.024
sp|O94260|G3BP_SCHPO	nxt3	Putative G3BP-like protein OS=Schizosaccharomyces pombe (strain 972 / ATCC 24843) GN=nxt3 PE=1 SV=1	662	8	C	277.927	335.966	255.836	356.365
sp|O74534|SLY1_SCHPO	sly1	Protein sly1 OS=Schizosaccharomyces pombe (strain 972 / ATCC 24843) GN=sly1 PE=3 SV=1	265	8	C	512.999	2781.87	452.388	760.333
sp|O74538|RL27B_SCHPO	rpl27b	60S ribosomal protein L27-B OS=Schizosaccharomyces pombe (strain 972 / ATCC 24843) GN=rpl27b PE=3 SV=1	1202	7	C	473.27	387.169	1083.35	891.459
sp|Q9P4X3|UTP7_SCHPO	utp7	Probable U3 small nucleolar RNA-associated protein 7 OS=Schizosaccharomyces pombe (strain 972 / ATCC 24843) GN=utp7 PE=3 SV=1	1099	7	C	697.485	622.533	646.397	535.483
sp|Q10434|CAPZA_SCHPO	acp1	F-actin-capping protein subunit alpha OS=Schizosaccharomyces pombe (strain 972 / ATCC 24843) GN=acp1 PE=1 SV=1	1035	7	C	387.72	620.306	156.077	131.617
sp|O13620|MRD1_SCHPO	mrd1	Multiple RNA-binding domain-containing protein 1 OS=Schizosaccharomyces pombe (strain 972 / ATCC 24843) GN=mrd1 PE=3 SV=1	889	7	C	832.729	648.94	814.794	716.095
sp|O94238|RL14_SCHPO	rpl14	60S ribosomal protein L14 OS=Schizosaccharomyces pombe (strain 972 / ATCC 24843) GN=rpl14 PE=2 SV=1	1019	7	C	499.43	441.824	1085.09	968.567
sp|Q9C1X1|PWP2_SCHPO	SPBC713.04c	Periodic tryptophan protein 2 homolog OS=Schizosaccharomyces pombe (strain 972 / ATCC 24843) GN=SPBC713.04c PE=1 SV=1	801	7	C	641.163	619.098	601.497	545.87
sp|Q9URV6|ATPJ_SCHPO	tim11	ATP synthase subunit e, mitochondrial OS=Schizosaccharomyces pombe (strain 972 / ATCC 24843) GN=tim11 PE=3 SV=3	811	7	C	402.228	404.482	269.202	246.294
sp|O94465|CMS1_SCHPO	cms1	Protein cms1 OS=Schizosaccharomyces pombe (strain 972 / ATCC 24843) GN=cms1 PE=3 SV=1	532	7	C	411.027	459.905	470.635	440.769
sp|Q9US25|HRP1_SCHPO	hrp1	Chromodomain helicase hrp1 OS=Schizosaccharomyces pombe (strain 972 / ATCC 24843) GN=hrp1 PE=1 SV=1	347	7	C	442.285	440.121	448.859	421.215
sp|Q9HE11|UTP5_SCHPO	utp5	U3 small nucleolar RNA-associated protein 5 OS=Schizosaccharomyces pombe (strain 972 / ATCC 24843) GN=utp5 PE=3 SV=2	1155	7	C	630.83	827.254	579.469	545.836
sp|O94698|NSA1_SCHPO	nsa1	Ribosome biogenesis protein nsa1 OS=Schizosaccharomyces pombe (strain 972 / ATCC 24843) GN=nsa1 PE=3 SV=1	386	7	C	307.847	375.93	490.166	465.306
sp|P50999|TCPD_SCHPO	cct4	T-complex protein 1 subunit delta OS=Schizosaccharomyces pombe (strain 972 / ATCC 24843) GN=cct4 PE=2 SV=2	77	7	C	353.998	348.583	445.287	424.339
sp|Q09857|USO1_SCHPO	uso1	Intracellular protein transport protein uso1 OS=Schizosaccharomyces pombe (strain 972 / ATCC 24843) GN=uso1 PE=3 SV=3	775	7	C	360.483	284.979	446.537	427.042
sp|Q10176|OST1_SCHPO	ost1	Dolichyl-diphosphooligosaccharide--protein glycosyltransferase subunit 1 OS=Schizosaccharomyces pombe (strain 972 / ATCC 24843) GN=ost1 PE=3 SV=1	1047	7	C	433.77	389.994	420.043	402.17
sp|O74484|MPG1_SCHPO	mpg1	Mannose-1-phosphate guanyltransferase OS=Schizosaccharomyces pombe (strain 972 / ATCC 24843) GN=mpg1 PE=2 SV=1	280	7	C	500.649	610.992	505.237	486.049
sp|O14463|TRX1_SCHPO	trx1	Thioredoxin-1 OS=Schizosaccharomyces pombe (strain 972 / ATCC 24843) GN=trx1 PE=3 SV=3	1088	7	C	734.474	729.077	914.411	884.774
sp|O94305|MGLL_SCHPO	SPCC5E4.05c	Putative monoglyceride lipase OS=Schizosaccharomyces pombe (strain 972 / ATCC 24843) GN=SPCC5E4.05c PE=1 SV=1	403	7	C	313.36	381.943	461.758	447.414
sp|O14317|RLA6_SCHPO	rpp203	60S acidic ribosomal protein P2-C OS=Schizosaccharomyces pombe (strain 972 / ATCC 24843) GN=rpp203 PE=1 SV=2	54	7	C	587.002	452.661	512.524	500.206
sp|Q9UUA1|YJX1_SCHPO	SPCC23B6.01c	Oxysterol-binding protein homolog C23B6.01c OS=Schizosaccharomyces pombe (strain 972 / ATCC 24843) GN=SPCC23B6.01c PE=1 SV=2	616	7	C	542.427	731.497	634.31	621.497
sp|Q9USK8|AGS1_SCHPO	ags1	Cell wall alpha-1,3-glucan synthase ags1 OS=Schizosaccharomyces pombe (strain 972 / ATCC 24843) GN=ags1 PE=1 SV=3	570	7	C	585.117	547.339	427.748	420.997
sp|O42832|SPB1_SCHPO	spb1	AdoMet-dependent rRNA methyltransferase spb1 OS=Schizosaccharomyces pombe (strain 972 / ATCC 24843) GN=spb1 PE=1 SV=2	103	7	C	366.671	386.782	481.216	484.458
sp|O74766|PUT2_SCHPO	SPBC24C6.04	Probable delta-1-pyrroline-5-carboxylate dehydrogenase OS=Schizosaccharomyces pombe (strain 972 / ATCC 24843) GN=SPBC24C6.04 PE=1 SV=1	22	7	C	267.291	300.376	399.736	404.019
sp|P08094|RLA2_SCHPO	rpp201	60S acidic ribosomal protein P2-alpha OS=Schizosaccharomyces pombe (strain 972 / ATCC 24843) GN=rpp201 PE=1 SV=1	54	7	C	347.258	285.638	353.857	359
sp|Q10146|RRP6_SCHPO	rrp6	Exosome complex exonuclease rrp6 OS=Schizosaccharomyces pombe (strain 972 / ATCC 24843) GN=rrp6 PE=3 SV=2	122	7	C	330.123	315.449	351.665	357.422
sp|O42846|RL34A_SCHPO	rpl34a	60S ribosomal protein L34-A OS=Schizosaccharomyces pombe (strain 972 / ATCC 24843) GN=rpl34a PE=3 SV=1	194	7	C	608.098	699.875	688.747	703.137
sp|O74767|COPE_SCHPO	sec28	Probable coatomer subunit epsilon OS=Schizosaccharomyces pombe (strain 972 / ATCC 24843) GN=sec28 PE=1 SV=1	483	7	C	273.218	268.856	320.497	327.2
sp|Q9C0X8|RRP12_SCHPO	SPAPB8E5.07c	Putative ribosomal RNA-processing protein 12 OS=Schizosaccharomyces pombe (strain 972 / ATCC 24843) GN=SPAPB8E5.07c PE=3 SV=1	410	7	C	215.715	258.888	279.064	288.07
sp|O94399|TWF1_SCHPO	twf1	Twinfilin OS=Schizosaccharomyces pombe (strain 972 / ATCC 24843) GN=twf1 PE=1 SV=1	153	7	C	247.881	363.714	290.114	301.051
sp|O59672|YB89_SCHPO	SPBC29A3.09c	Uncharacterized ABC transporter ATP-binding protein C29A3.09c OS=Schizosaccharomyces pombe (strain 972 / ATCC 24843) GN=SPBC29A3.09c PE=3 SV=1	803	7	C	443.656	325.066	401.003	416.858
sp|Q92370|TRPG_SCHPO	trp1	Multifunctional tryptophan biosynthesis protein OS=Schizosaccharomyces pombe (strain 972 / ATCC 24843) GN=trp1 PE=2 SV=2	677	7	C	363.886	473.871	379.663	395.158
sp|O42861|FFT3_SCHPO	fft3	ATP-dependent helicase fft3 OS=Schizosaccharomyces pombe (strain 972 / ATCC 24843) GN=fft3 PE=1 SV=1	320	7	C	381.073	388.907	420.8	437.976
sp|Q9UUE2|CSX2_SCHPO	csx2	Protein csx2 OS=Schizosaccharomyces pombe (strain 972 / ATCC 24843) GN=csx2 PE=1 SV=1	551	7	C	432.774	367.896	433.108	451.79
sp|O60119|YH75_SCHPO	SPBC16G5.05c	Vesicle-associated membrane protein-associated protein C16G5.05c OS=Schizosaccharomyces pombe (strain 972 / ATCC 24843) GN=SPBC16G5.05c PE=1 SV=1	830	7	C	396.077	322.175	419.256	441.935
sp|P24487|ATPA_SCHPO	atp1	ATP synthase subunit alpha, mitochondrial OS=Schizosaccharomyces pombe (strain 972 / ATCC 24843) GN=atp1 PE=3 SV=1	61	7	C	274.158	473.119	385.312	407.542
sp|P20772|PUR2_SCHPO	ade1	Bifunctional purine biosynthetic protein ADE1 OS=Schizosaccharomyces pombe (strain 972 / ATCC 24843) GN=ade1 PE=3 SV=1	856	7	C	420.439	387.479	382.985	409.741
sp|O14368|HSP16_SCHPO	hsp16	Heat shock protein 16 OS=Schizosaccharomyces pombe (strain 972 / ATCC 24843) GN=hsp16 PE=1 SV=1	836	7	C	653.278	758.117	583.064	626.195
sp|Q9UTJ7|SDHA_SCHPO	sdh1	Probable succinate dehydrogenase [ubiquinone] flavoprotein subunit, mitochondrial OS=Schizosaccharomyces pombe (strain 972 / ATCC 24843) GN=sdh1 PE=2 SV=1	428	7	C	557.459	577.051	486.909	523.193
sp|O94313|CARB_SCHPO	arg4	Carbamoyl-phosphate synthase arginine-specific large chain OS=Schizosaccharomyces pombe (strain 972 / ATCC 24843) GN=arg4 PE=3 SV=1	155	7	C	450.225	473.028	331.995	358.262
sp|Q9P7W7|YGQ3_SCHPO	SPBC1703.03c	Uncharacterized ARM-like repeat-containing protein C1703.03c OS=Schizosaccharomyces pombe (strain 972 / ATCC 24843) GN=SPBC1703.03c PE=3 SV=1	136	7	C	287.382	351.425	492.488	536.188
sp|Q9P7V5|SEC7B_SCHPO	sec72	Protein transport protein sec72 OS=Schizosaccharomyces pombe (strain 972 / ATCC 24843) GN=sec72 PE=1 SV=1	286	7	C	319.579	343.104	361.788	398.252
sp|Q92375|TRXB_SCHPO	trr1	Thioredoxin reductase OS=Schizosaccharomyces pombe (strain 972 / ATCC 24843) GN=trr1 PE=1 SV=1	1101	7	C	150.926	152.926	119.239	132.197
sp|Q9P7F8|GET3_SCHPO	get3	ATPase get3 OS=Schizosaccharomyces pombe (strain 972 / ATCC 24843) GN=get3 PE=1 SV=1	440	7	C	303.135	351.204	375.846	423.254
sp|O13936|SPT5_SCHPO	spt5	Transcription elongation factor spt5 OS=Schizosaccharomyces pombe (strain 972 / ATCC 24843) GN=spt5 PE=1 SV=1	419	7	C	346.122	398.957	443.477	509.074
sp|Q09871|YAG7_SCHPO	SPAC12G12.07c	Uncharacterized protein C12G12.07c OS=Schizosaccharomyces pombe (strain 972 / ATCC 24843) GN=SPAC12G12.07c PE=4 SV=1	569	7	C	441.364	337.618	260.15	298.723
sp|O60060|CARA_SCHPO	arg5	Carbamoyl-phosphate synthase arginine-specific small chain OS=Schizosaccharomyces pombe (strain 972 / ATCC 24843) GN=arg5 PE=3 SV=1	954	7	C	699.434	762.721	692.603	795.416
sp|P52808|RL30A_SCHPO	rpl30a	60S ribosomal protein L30-1 OS=Schizosaccharomyces pombe (strain 972 / ATCC 24843) GN=rpl30a PE=3 SV=2	1370	7	C	338.518	477.086	768.574	898.309
sp|Q1MTS0|YBH9_SCHPO	SPBC3B8.09	Uncharacterized protein C3B8.09 OS=Schizosaccharomyces pombe (strain 972 / ATCC 24843) GN=SPBC3B8.09 PE=1 SV=1	1150	6	C	748.317	575.013	591.976	417.569
sp|Q9P775|YBEG_SCHPO	SPBC1711.16	Uncharacterized WD repeat-containing protein C17D11.16 OS=Schizosaccharomyces pombe (strain 972 / ATCC 24843) GN=SPBC1711.16 PE=1 SV=1	105	6	C	744.368	514.877	446.543	341.654
sp|Q09924|EI2BD_SCHPO	tif224	Probable translation initiation factor eIF-2B subunit delta OS=Schizosaccharomyces pombe (strain 972 / ATCC 24843) GN=tif224 PE=1 SV=1	1283	6	C	519.623	530.682	479.252	368.551
sp|Q10232|RL9A_SCHPO	rpl9a	60S ribosomal protein L9-A OS=Schizosaccharomyces pombe (strain 972 / ATCC 24843) GN=rpl9a PE=3 SV=1	663	6	C	581.443	505.7	1034.44	813.717
sp|Q09171|ODPB_SCHPO	pdb1	Pyruvate dehydrogenase E1 component subunit beta, mitochondrial OS=Schizosaccharomyces pombe (strain 972 / ATCC 24843) GN=pdb1 PE=4 SV=1	35	6	C	1427.41	1262.74	1096.02	913.121
sp|P21565|SRP54_SCHPO	srp54	Signal recognition particle 54 kDa protein homolog OS=Schizosaccharomyces pombe (strain 972 / ATCC 24843) GN=srp54 PE=1 SV=1	567	6	C	311.707	278.709	535.397	449.114
sp|Q09705|RT24_SCHPO	rsm24	37S ribosomal protein S24, mitochondrial OS=Schizosaccharomyces pombe (strain 972 / ATCC 24843) GN=rsm24 PE=3 SV=1	1319	6	C	360.788	254.556	430.98	366.324
sp|Q09867|EFG1P_SCHPO	efg1	rRNA-processing protein efg1 OS=Schizosaccharomyces pombe (strain 972 / ATCC 24843) GN=efg1 PE=3 SV=2	1007	6	C	526.899	468.519	410.636	350.8
sp|O13846|SCS7_SCHPO	SPAC19G12.08	Ceramide very long chain fatty acid hydroxylase-like protein C19G12.08 OS=Schizosaccharomyces pombe (strain 972 / ATCC 24843) GN=SPAC19G12.08 PE=3 SV=1	939	6	C	915.813	905.299	1167.67	997.71
sp|P41878|RPN11_SCHPO	rpn11	26S proteasome regulatory subunit rpn11 OS=Schizosaccharomyces pombe (strain 972 / ATCC 24843) GN=rpn11 PE=1 SV=2	571	6	C	310.791	233.376	343.621	304.916
sp|P09322|H4_SCHPO	hhf1	Histone H4 OS=Schizosaccharomyces pombe (strain 972 / ATCC 24843) GN=hhf1 PE=1 SV=2	637	6	C	891.493	821.193	885.185	790.627
sp|O60080|DBP9_SCHPO	dbp9	ATP-dependent RNA helicase dbp9 OS=Schizosaccharomyces pombe (strain 972 / ATCC 24843) GN=dbp9 PE=3 SV=1	600	6	C	473.076	372.887	415.458	374.002
sp|Q06975|GAR1_SCHPO	gar1	H/ACA ribonucleoprotein complex subunit 1 OS=Schizosaccharomyces pombe (strain 972 / ATCC 24843) GN=gar1 PE=2 SV=1	1268	6	C	885.211	738.76	703.044	638.275
sp|O74790|GLRX4_SCHPO	grx4	Monothiol glutaredoxin-4 OS=Schizosaccharomyces pombe (strain 972 / ATCC 24843) GN=grx4 PE=1 SV=1	32	6	C	540.688	475.076	630.878	574.151
sp|O94523|ACO1_SCHPO	SPCC1281.06c	Probable acyl-CoA desaturase OS=Schizosaccharomyces pombe (strain 972 / ATCC 24843) GN=SPCC1281.06c PE=3 SV=1	1178	6	C	336.113	348.58	361.07	328.887
sp|Q9P6K0|YLA3_SCHPO	SPAC1527.03	Uncharacterized HTH La-type RNA-binding protein C1527.03 OS=Schizosaccharomyces pombe (strain 972 / ATCC 24843) GN=SPAC1527.03 PE=1 SV=1	498	6	C	241.694	185.704	350.466	329.205
sp|Q10349|SERC_SCHPO	SPAC1F12.07	Putative phosphoserine aminotransferase OS=Schizosaccharomyces pombe (strain 972 / ATCC 24843) GN=SPAC1F12.07 PE=3 SV=1	516	6	C	416.671	337.679	430.589	406.988
sp|Q9URX8|NG06_SCHPO	SPAC890.06	Probable nucleoporin C890.06 OS=Schizosaccharomyces pombe (strain 972 / ATCC 24843) GN=SPAC890.06 PE=3 SV=3	1382	6	C	448.616	523.573	229.773	218.69
sp|O74462|TAF6_SCHPO	taf6	Transcription initiation factor TFIID subunit 6 OS=Schizosaccharomyces pombe (strain 972 / ATCC 24843) GN=taf6 PE=1 SV=1	652	6	C	243.198	293.659	355.889	339.582
sp|Q9Y7R8|MDHM_SCHPO	MDH1	Malate dehydrogenase, mitochondrial OS=Schizosaccharomyces pombe (strain 972 / ATCC 24843) GN=MDH1 PE=3 SV=1	649	6	C	487.789	441.466	622.23	595.874
sp|Q10190|LSG1_SCHPO	lsg1	Large subunit GTPase 1 OS=Schizosaccharomyces pombe (strain 972 / ATCC 24843) GN=lsg1 PE=3 SV=1	1306	6	C	272.113	279.407	294.191	283.479
sp|Q9P7Q4|SEC18_SCHPO	sec18	Vesicular-fusion protein sec18 OS=Schizosaccharomyces pombe (strain 972 / ATCC 24843) GN=sec18 PE=1 SV=1	284	6	C	247.205	284.435	316.502	306.554
sp|O36018|BUD22_SCHPO	SPAC4F10.06	BUD22 family protein C4F10.06 OS=Schizosaccharomyces pombe (strain 972 / ATCC 24843) GN=SPAC4F10.06 PE=3 SV=1	500	6	C	464.69	418.564	356.075	345.114
sp|Q9UT08|2AAA_SCHPO	paa1	Protein phosphatase PP2A regulatory subunit A OS=Schizosaccharomyces pombe (strain 972 / ATCC 24843) GN=paa1 PE=3 SV=1	45	6	C	638.323	659.194	690.359	670.728
sp|Q10334|ALAT_SCHPO	SPBC582.08	Putative alanine aminotransferase OS=Schizosaccharomyces pombe (strain 972 / ATCC 24843) GN=SPBC582.08 PE=3 SV=1	1026	6	C	258.609	241.36	253.342	246.784
sp|O59727|YHX7_SCHPO	SPBC3E7.07c	Protein PBDC1 homolog OS=Schizosaccharomyces pombe (strain 972 / ATCC 24843) GN=SPBC3E7.07c PE=3 SV=1	576	6	C	251.711	288.593	263.413	259.942
sp|P56287|EI2BE_SCHPO	tif225	Probable translation initiation factor eIF-2B subunit epsilon OS=Schizosaccharomyces pombe (strain 972 / ATCC 24843) GN=tif225 PE=1 SV=1	893	6	C	318.621	232.105	332.899	328.769
sp|O13910|MPP10_SCHPO	mpp10	U3 small nucleolar ribonucleoprotein protein mpp10 OS=Schizosaccharomyces pombe (strain 972 / ATCC 24843) GN=mpp10 PE=1 SV=1	619	6	C	708.589	650.294	451.24	446.421
sp|Q9P6K3|YLF8_SCHPO	SPAC30C2.08	UPF0662 protein C30C2.08 OS=Schizosaccharomyces pombe (strain 972 / ATCC 24843) GN=SPAC30C2.08 PE=3 SV=1	514	6	C	205.073	149.144	180.165	178.58
sp|O42644|PYRG_SCHPO	ura7	CTP synthase OS=Schizosaccharomyces pombe (strain 972 / ATCC 24843) GN=ura7 PE=3 SV=1	976	6	C	267.784	255.074	335.07	335.462
sp|Q09748|DNM1_SCHPO	dnm1	Dynamin-related protein dnm1 OS=Schizosaccharomyces pombe (strain 972 / ATCC 24843) GN=dnm1 PE=3 SV=1	404	6	C	793.572	689.546	836.422	840.272
sp|O13788|SSR1_SCHPO	ssr1	SWI/SNF and RSC complexes subunit ssr1 OS=Schizosaccharomyces pombe (strain 972 / ATCC 24843) GN=ssr1 PE=1 SV=1	825	6	C	281.433	371.536	357.041	359.383
sp|P08096|TOP2_SCHPO	top2	DNA topoisomerase 2 OS=Schizosaccharomyces pombe (strain 972 / ATCC 24843) GN=top2 PE=1 SV=2	287	6	C	353.889	424.212	433.993	439.821
sp|Q10333|PEX11_SCHPO	pex11	Peroxisomal biogenesis factor 11 OS=Schizosaccharomyces pombe (strain 972 / ATCC 24843) GN=pex11 PE=3 SV=2	391	6	C	266.65	266.314	342.749	347.48
sp|Q9P377|BGS3_SCHPO	bgs3	1,3-beta-glucan synthase component bgs3 OS=Schizosaccharomyces pombe (strain 972 / ATCC 24843) GN=bgs3 PE=1 SV=1	741	6	C	1126.26	840.219	425.102	431.349
sp|O94642|TAD2_SCHPO	tad2	tRNA-specific adenosine deaminase subunit tad2 OS=Schizosaccharomyces pombe (strain 972 / ATCC 24843) GN=tad2 PE=3 SV=2	1000	6	C	271.835	352.068	296.747	301.489
sp|O74842|FFT2_SCHPO	fft2	ATP-dependent helicase fft2 OS=Schizosaccharomyces pombe (strain 972 / ATCC 24843) GN=fft2 PE=1 SV=1	347	6	C	369.706	347.3	269.5	275.326
sp|P04689|TBA2_SCHPO	tub1	Tubulin alpha-2 chain OS=Schizosaccharomyces pombe (strain 972 / ATCC 24843) GN=tub1 PE=1 SV=2	218	6	C	286.045	290.036	301.256	309.854
sp|Q10283|HMDH_SCHPO	hmg1	3-hydroxy-3-methylglutaryl-coenzyme A reductase OS=Schizosaccharomyces pombe (strain 972 / ATCC 24843) GN=hmg1 PE=1 SV=2	322	6	C	436.168	415.407	422.487	434.878
sp|Q09845|GPD2_SCHPO	gpd2	Glycerol-3-phosphate dehydrogenase [NAD(+)] 2 OS=Schizosaccharomyces pombe (strain 972 / ATCC 24843) GN=gpd2 PE=1 SV=1	900	6	C	554.053	479.072	608.763	627.944
sp|O60144|RS16_SCHPO	rps16a	40S ribosomal protein S16 OS=Schizosaccharomyces pombe (strain 972 / ATCC 24843) GN=rps16a PE=2 SV=1	336	6	C	205.487	148.483	197.285	203.674
sp|P40231|CSK2A_SCHPO	cka1	Casein kinase II subunit alpha OS=Schizosaccharomyces pombe (strain 972 / ATCC 24843) GN=cka1 PE=2 SV=2	1586	6	C	709.941	704.831	365.156	380.32
sp|Q9P7V2|ABC4_SCHPO	abc4	ATP-binding cassette transporter abc4 OS=Schizosaccharomyces pombe (strain 972 / ATCC 24843) GN=abc4 PE=3 SV=1	774	6	C	320.462	372.519	448.634	469.265
sp|P05733|RL37B_SCHPO	rpl37b	60S ribosomal protein L37-B OS=Schizosaccharomyces pombe (strain 972 / ATCC 24843) GN=rpl37b PE=1 SV=4	1236	6	C	314.18	253.338	678.788	712.584
sp|O36033|YLM1_SCHPO	SPAC19B12.01	TPR repeat-containing protein C19B12.01 OS=Schizosaccharomyces pombe (strain 972 / ATCC 24843) GN=SPAC19B12.01 PE=3 SV=2	928	6	C	272.533	322.624	323.046	340.095
sp|Q9UU83|PAL1_SCHPO	pal1	Protein pal1 OS=Schizosaccharomyces pombe (strain 972 / ATCC 24843) GN=pal1 PE=1 SV=1	1012	6	C	1820.3	1220.13	284.535	300.77
sp|O74928|PUR9_SCHPO	ade10	Bifunctional purine biosynthesis protein ade10 OS=Schizosaccharomyces pombe (strain 972 / ATCC 24843) GN=ade10 PE=2 SV=1	717	6	C	229	152.537	272.452	291.666
sp|Q9USN3|UTP13_SCHPO	utp13	Probable U3 small nucleolar RNA-associated protein 13 OS=Schizosaccharomyces pombe (strain 972 / ATCC 24843) GN=utp13 PE=3 SV=3	713	6	C	430.036	422.936	326.568	349.716
sp|O14062|RS12A_SCHPO	rps12a	40S ribosomal protein S12-A OS=Schizosaccharomyces pombe (strain 972 / ATCC 24843) GN=rps12a PE=3 SV=1	413	6	C	464.875	590.755	610.918	654.698
sp|O60162|YG23_SCHPO	SPBC19F5.03	Uncharacterized protein C19F5.03 OS=Schizosaccharomyces pombe (strain 972 / ATCC 24843) GN=SPBC19F5.03 PE=1 SV=1	1154	6	C	296.743	364.131	411.997	442.647
sp|O14369|SCE3_SCHPO	sce3	Probable RNA-binding protein sce3 OS=Schizosaccharomyces pombe (strain 972 / ATCC 24843) GN=sce3 PE=1 SV=1	558	6	C	306.527	334.401	312.161	335.401
sp|Q9UUB6|UBLH2_SCHPO	uch2	Ubiquitin carboxyl-terminal hydrolase 2 OS=Schizosaccharomyces pombe (strain 972 / ATCC 24843) GN=uch2 PE=1 SV=1	68	6	C	219.277	221.475	271.39	291.802
sp|O74452|SCW1_SCHPO	scw1	Cell wall integrity protein scw1 OS=Schizosaccharomyces pombe (strain 972 / ATCC 24843) GN=scw1 PE=1 SV=1	160	6	C	273.426	236.995	292.072	318.458
sp|O14011|PRP19_SCHPO	prp19	Pre-mRNA-processing factor 19 OS=Schizosaccharomyces pombe (strain 972 / ATCC 24843) GN=prp19 PE=1 SV=1	1091	6	C	288.321	353.346	249.056	273.256
sp|O14063|IMA1_SCHPO	cut15	Importin subunit alpha-1 OS=Schizosaccharomyces pombe (strain 972 / ATCC 24843) GN=cut15 PE=1 SV=1	1050	6	C	746.638	461.732	387.952	427.252
sp|Q10066|ARGI2_SCHPO	aru1	Arginase OS=Schizosaccharomyces pombe (strain 972 / ATCC 24843) GN=aru1 PE=3 SV=1	250	6	C	312.127	257.848	284.939	313.91
sp|Q96WV0|UREG_SCHPO	SPCPB16A4.05c	Uncharacterized urease accessory protein ureG-like OS=Schizosaccharomyces pombe (strain 972 / ATCC 24843) GN=SPCPB16A4.05c PE=3 SV=1	216	6	C	400.982	404.556	492.458	544.032
sp|O13940|GLY1_SCHPO	gly1	Probable low-specificity L-threonine aldolase OS=Schizosaccharomyces pombe (strain 972 / ATCC 24843) GN=gly1 PE=3 SV=1	1162	6	C	255.095	248.049	234.29	259.527
sp|Q09718|AP2M_SCHPO	apm4	AP-2 complex subunit mu OS=Schizosaccharomyces pombe (strain 972 / ATCC 24843) GN=apm4 PE=1 SV=1	271	6	C	2045.76	1445.86	373.242	416.995
sp|O42885|YBN1_SCHPO	SPBC8E4.01c	Putative inorganic phosphate transporter C8E4.01c OS=Schizosaccharomyces pombe (strain 972 / ATCC 24843) GN=SPBC8E4.01c PE=1 SV=2	185	6	C	396.133	426.039	295.839	333.692
sp|P78812|6PGD_SCHPO	SPBC660.16	6-phosphogluconate dehydrogenase, decarboxylating OS=Schizosaccharomyces pombe (strain 972 / ATCC 24843) GN=SPBC660.16 PE=1 SV=2	868	6	C	427.456	520.615	388.803	445.434
sp|O13648|ANM3_SCHPO	rmt3	Ribosomal protein arginine N-methyltransferase rmt3 OS=Schizosaccharomyces pombe (strain 972 / ATCC 24843) GN=rmt3 PE=1 SV=3	1278	6	C	332.988	372.922	376.789	435.917
sp|Q9URM2|TKT_SCHPO	SPBC2G5.05	Probable transketolase OS=Schizosaccharomyces pombe (strain 972 / ATCC 24843) GN=SPBC2G5.05 PE=2 SV=1	1181	6	C	475.932	698.242	388.795	454.402
sp|Q9USP6|CLC1_SCHPO	clc1	Clathrin light chain OS=Schizosaccharomyces pombe (strain 972 / ATCC 24843) GN=clc1 PE=1 SV=1	290	6	C	1341.04	784.875	130.112	152.601
sp|P32390|ARP3_SCHPO	act2	Actin-related protein 3 OS=Schizosaccharomyces pombe (strain 972 / ATCC 24843) GN=act2 PE=1 SV=1	121	6	C	259.985	299.86	366.697	432.116
sp|O14351|YB45_SCHPO	SPBC30D10.05c	Uncharacterized oxidoreductase C30D10.05c OS=Schizosaccharomyces pombe (strain 972 / ATCC 24843) GN=SPBC30D10.05c PE=3 SV=1	393	6	C	186.134	152.094	204.656	243.354
sp|P50521|HXK2_SCHPO	hxk2	Hexokinase-2 OS=Schizosaccharomyces pombe (strain 972 / ATCC 24843) GN=hxk2 PE=2 SV=1	671	6	C	255.093	341.905	277.573	333.872
sp|Q10253|MUG64_SCHPO	mug64	Meiotically up-regulated gene 64 protein OS=Schizosaccharomyces pombe (strain 972 / ATCC 24843) GN=mug64 PE=1 SV=3	814	6	C	439.7	425.716	346.554	418.454
sp|Q9UT74|LYS4_SCHPO	lys2	Homoaconitase, mitochondrial OS=Schizosaccharomyces pombe (strain 972 / ATCC 24843) GN=lys2 PE=3 SV=1	1016	6	C	236.845	250.82	176.596	214.366
sp|O94671|DHOM_SCHPO	SPBC776.03	Probable homoserine dehydrogenase OS=Schizosaccharomyces pombe (strain 972 / ATCC 24843) GN=SPBC776.03 PE=1 SV=1	208	6	C	283.19	364.035	219.709	273.139
sp|P78917|G6PI_SCHPO	pgi1	Glucose-6-phosphate isomerase OS=Schizosaccharomyces pombe (strain 972 / ATCC 24843) GN=pgi1 PE=1 SV=2	623	6	C	245.031	298.112	260.64	326.237
sp|P87171|KPR5_SCHPO	SPBC3D6.06c	Ribose-phosphate pyrophosphokinase 5 OS=Schizosaccharomyces pombe (strain 972 / ATCC 24843) GN=SPBC3D6.06c PE=3 SV=1	534	6	C	692.552	826.085	480.174	701.539
sp|Q9UTN2|YII1_SCHPO	SPAC139.01c	Uncharacterized protein C139.01c OS=Schizosaccharomyces pombe (strain 972 / ATCC 24843) GN=SPAC139.01c PE=1 SV=2	522	6	C	377.297	784.797	365.219	562.602
sp|O14104|LYS12_SCHPO	lys12	Homoisocitrate dehydrogenase OS=Schizosaccharomyces pombe (strain 972 / ATCC 24843) GN=lys12 PE=1 SV=1	1183	5	C	1114.6	1030.59	1188.7	823.962
sp|O43060|EIF3F_SCHPO	eif3f	Eukaryotic translation initiation factor 3 subunit F OS=Schizosaccharomyces pombe (strain 972 / ATCC 24843) GN=eif3f PE=1 SV=1	431	5	C	320.372	310.955	317.798	228.307
sp|Q9USH7|PSY1_SCHPO	psy1	Syntaxin-like protein psy1 OS=Schizosaccharomyces pombe (strain 972 / ATCC 24843) GN=psy1 PE=3 SV=1	540	5	C	1093.02	1039.6	302.745	233.381
sp|O94511|YN67_SCHPO	SPBC646.07c	Putative enoyl reductase C646.07c OS=Schizosaccharomyces pombe (strain 972 / ATCC 24843) GN=SPBC646.07c PE=3 SV=1	938	5	C	573.173	425.685	437.304	347.495
sp|O14112|RS10A_SCHPO	rps10a	40S ribosomal protein S10-A OS=Schizosaccharomyces pombe (strain 972 / ATCC 24843) GN=rps10a PE=3 SV=1	311	5	C	392.492	217.36	207.306	165.002
sp|O94709|ODPX_SCHPO	SPCC1259.09c	Probable pyruvate dehydrogenase protein X component, mitochondrial OS=Schizosaccharomyces pombe (strain 972 / ATCC 24843) GN=SPCC1259.09c PE=2 SV=1	669	5	C	355.158	350.107	302.193	242.945
sp|P40847|SAP1_SCHPO	sap1	Switch-activating protein 1 OS=Schizosaccharomyces pombe (strain 972 / ATCC 24843) GN=sap1 PE=1 SV=2	1449	5	C	503.845	404.699	305.233	255.731
sp|Q10245|MKAR_SCHPO	SPAC4G9.15	Very-long-chain 3-oxoacyl-CoA reductase OS=Schizosaccharomyces pombe (strain 972 / ATCC 24843) GN=SPAC4G9.15 PE=3 SV=1	197	5	C	402.868	399.696	523.555	441.514
sp|P41004|SMC4_SCHPO	cut3	Structural maintenance of chromosomes protein 4 OS=Schizosaccharomyces pombe (strain 972 / ATCC 24843) GN=cut3 PE=1 SV=2	810	5	C	317.923	326.477	433.444	369.317
sp|Q9HGM3|YTA12_SCHPO	yta12	Mitochondrial respiratory chain complexes assembly protein rca1 OS=Schizosaccharomyces pombe (strain 972 / ATCC 24843) GN=yta12 PE=3 SV=1	11	5	C	326.339	270.596	369.485	318.219
sp|O94284|HMT2_SCHPO	hmt2	Sulfide:quinone oxidoreductase, mitochondrial OS=Schizosaccharomyces pombe (strain 972 / ATCC 24843) GN=hmt2 PE=3 SV=1	834	5	C	972.731	1007.35	627.889	543.591
sp|O94335|STT3_SCHPO	stt3	Dolichyl-diphosphooligosaccharide--protein glycosyltransferase subunit stt3 OS=Schizosaccharomyces pombe (strain 972 / ATCC 24843) GN=stt3 PE=3 SV=1	426	5	C	409.201	330.235	399.243	347.357
sp|O42952|RS30_SCHPO	rps30a	40S ribosomal protein S30 OS=Schizosaccharomyces pombe (strain 972 / ATCC 24843) GN=rps30a PE=3 SV=2	1148	5	C	449.359	389.874	536.379	469.21
sp|O74893|RS20_SCHPO	rps20	40S ribosomal protein S20 OS=Schizosaccharomyces pombe (strain 972 / ATCC 24843) GN=rps20 PE=1 SV=1	1018	5	C	246.937	174.999	246.743	215.946
sp|Q09915|SPT6_SCHPO	spt6	Transcription elongation factor spt6 OS=Schizosaccharomyces pombe (strain 972 / ATCC 24843) GN=spt6 PE=1 SV=2	795	5	C	392.318	353.895	367.984	323.481
sp|O13823|IMP4_SCHPO	imp4	U3 small nucleolar ribonucleoprotein protein imp4 OS=Schizosaccharomyces pombe (strain 972 / ATCC 24843) GN=imp4 PE=3 SV=1	560	5	C	354.304	323.568	246.389	216.912
sp|Q9P7V8|MPCP_SCHPO	SPBC1703.13c	Probable mitochondrial phosphate carrier protein OS=Schizosaccharomyces pombe (strain 972 / ATCC 24843) GN=SPBC1703.13c PE=3 SV=1	232	5	C	422.574	498.747	646.504	581.395
sp|Q9HGL2|YHLA_SCHPO	SPBC800.10c	Uncharacterized calcium-binding protein C800.10c OS=Schizosaccharomyces pombe (strain 972 / ATCC 24843) GN=SPBC800.10c PE=3 SV=1	525	5	C	3445.27	1532.56	266.327	240.434
sp|O94365|UTP15_SCHPO	utp15	U3 small nucleolar RNA-associated protein 15 OS=Schizosaccharomyces pombe (strain 972 / ATCC 24843) GN=utp15 PE=3 SV=1	1068	5	C	290.897	312.353	352.546	321.942
sp|Q9Y7P0|RISA_SCHPO	rib5	Riboflavin synthase OS=Schizosaccharomyces pombe (strain 972 / ATCC 24843) GN=rib5 PE=1 SV=1	231	5	C	937.386	856.406	227	208.179
sp|O13960|ECM33_SCHPO	ecm33	Cell wall protein ecm33 OS=Schizosaccharomyces pombe (strain 972 / ATCC 24843) GN=ecm33 PE=1 SV=2	1158	5	C	389.045	268.866	312.008	287.149
sp|O14027|PDX1_SCHPO	snz1	Probable pyridoxal 5'-phosphate synthase subunit PDX1 OS=Schizosaccharomyces pombe (strain 972 / ATCC 24843) GN=snz1 PE=1 SV=1	246	5	C	305.119	350.022	189.381	175.673
sp|Q9UTN1|OAC1_SCHPO	oac1	Mitochondrial oxaloacetate transport protein OS=Schizosaccharomyces pombe (strain 972 / ATCC 24843) GN=oac1 PE=3 SV=1	381	5	C	358.04	300.413	462.683	429.72
sp|Q9P6I5|KGUA_SCHPO	SPBC1198.05	Guanylate kinase OS=Schizosaccharomyces pombe (strain 972 / ATCC 24843) GN=SPBC1198.05 PE=3 SV=1	148	5	C	156.4	177.166	122.249	113.667
sp|O94415|SUCB_SCHPO	SPCC1620.08	Probable succinyl-CoA ligase [GDP-forming] subunit beta, mitochondrial OS=Schizosaccharomyces pombe (strain 972 / ATCC 24843) GN=SPCC1620.08 PE=3 SV=1	721	5	C	278.221	272.035	286.559	267.29
sp|Q09818|YAC4_SCHPO	SPAC16C9.04c	Putative general negative regulator of transcription C16C9.04c OS=Schizosaccharomyces pombe (strain 972 / ATCC 24843) GN=SPAC16C9.04c PE=3 SV=1	82	5	C	223.517	238.674	255.395	238.725
sp|O74440|RPN8_SCHPO	rpn8	26S proteasome regulatory subunit rpn8 OS=Schizosaccharomyces pombe (strain 972 / ATCC 24843) GN=rpn8 PE=3 SV=1	201	5	C	320.362	201.599	366.405	343.493
sp|P28748|SPI1_SCHPO	spi1	GTP-binding nuclear protein spi1 OS=Schizosaccharomyces pombe (strain 972 / ATCC 24843) GN=spi1 PE=1 SV=1	1481	5	C	354.141	365.503	416.977	392.783
sp|O94616|RPAC1_SCHPO	rpc40	DNA-directed RNA polymerases I and III subunit RPAC1 OS=Schizosaccharomyces pombe (strain 972 / ATCC 24843) GN=rpc40 PE=3 SV=1	1138	5	C	274.904	252.44	274.071	258.286
sp|O94676|UTP22_SCHPO	utp22	U3 small nucleolar RNA-associated protein 22 OS=Schizosaccharomyces pombe (strain 972 / ATCC 24843) GN=utp22 PE=3 SV=1	504	5	C	376.19	385.726	346.583	331.549
sp|O94550|PHB2_SCHPO	phb2	Prohibitin-2 OS=Schizosaccharomyces pombe (strain 972 / ATCC 24843) GN=phb2 PE=1 SV=2	62	5	C	389.672	343.423	338.098	323.874
sp|Q09100|RNP24_SCHPO	rnp24	RNA-binding protein rnp24 OS=Schizosaccharomyces pombe (strain 972 / ATCC 24843) GN=rnp24 PE=3 SV=2	692	5	C	370.811	315.13	372.975	357.649
sp|O74429|VIP1_SCHPO	asp1	Inositol hexakisphosphate and diphosphoinositol-pentakisphosphate kinase OS=Schizosaccharomyces pombe (strain 972 / ATCC 24843) GN=asp1 PE=1 SV=1	749	5	C	290.508	290.558	308.247	295.979
sp|O94476|IF6_SCHPO	tif6	Eukaryotic translation initiation factor 6 OS=Schizosaccharomyces pombe (strain 972 / ATCC 24843) GN=tif6 PE=3 SV=1	1204	5	C	97.9491	92.0841	651.674	627.617
sp|O13696|IDH1_SCHPO	idh1	Isocitrate dehydrogenase [NAD] subunit 1, mitochondrial OS=Schizosaccharomyces pombe (strain 972 / ATCC 24843) GN=idh1 PE=1 SV=1	1190	5	C	374.913	361.862	442.178	425.966
sp|O13928|RHO3_SCHPO	rho3	GTP-binding protein rho3 OS=Schizosaccharomyces pombe (strain 972 / ATCC 24843) GN=rho3 PE=1 SV=2	815	5	C	80.3236	126.132	160.204	154.559
sp|O13966|ACON_SCHPO	SPAC24C9.06c	Aconitate hydratase, mitochondrial OS=Schizosaccharomyces pombe (strain 972 / ATCC 24843) GN=SPAC24C9.06c PE=3 SV=2	696	5	C	236.162	208.452	229.239	221.821
sp|Q9UTN3|CID14_SCHPO	cid14	Poly(A) RNA polymerase cid14 OS=Schizosaccharomyces pombe (strain 972 / ATCC 24843) GN=cid14 PE=1 SV=2	109	5	C	531.986	535.439	405.193	394.737
sp|P87123|RPB11_SCHPO	rpb11	DNA-directed RNA polymerase II subunit RPB11 OS=Schizosaccharomyces pombe (strain 972 / ATCC 24843) GN=rpb11 PE=1 SV=1	1556	5	C	405.585	405.876	374.198	364.636
sp|P78854|PLB1_SCHPO	plb1	Lysophospholipase 1 OS=Schizosaccharomyces pombe (strain 972 / ATCC 24843) GN=plb1 PE=2 SV=2	422	5	C	431.485	323.694	123.777	121.783
sp|Q9USG6|RL33B_SCHPO	rpl33b	60S ribosomal protein L33-B OS=Schizosaccharomyces pombe (strain 972 / ATCC 24843) GN=rpl33b PE=1 SV=1	916	5	C	346.927	307.003	671.264	664.553
sp|O94319|SEC13_SCHPO	sec13	Protein transport protein sec13 OS=Schizosaccharomyces pombe (strain 972 / ATCC 24843) GN=sec13 PE=1 SV=1	1531	5	C	213.06	275.718	303.134	301.419
sp|Q9P3U0|UBP2_SCHPO	ubp2	Probable ubiquitin carboxyl-terminal hydrolase 2 OS=Schizosaccharomyces pombe (strain 972 / ATCC 24843) GN=ubp2 PE=1 SV=1	140	5	C	242.535	275.018	291.211	289.682
sp|Q9URV8|YBL3_SCHPO	SPBC106.03	UPF0744 protein C106.03 OS=Schizosaccharomyces pombe (strain 972 / ATCC 24843) GN=SPBC106.03 PE=1 SV=1	1115	5	C	428.922	450.924	445.321	443.564
sp|Q9P784|RL4B_SCHPO	rpl4b	60S ribosomal protein L4-B OS=Schizosaccharomyces pombe (strain 972 / ATCC 24843) GN=rpl4b PE=3 SV=1	242	5	C	253.449	313.157	675.099	674.156
sp|Q10484|YDFC_SCHPO	SPAC17C9.12	Uncharacterized protein C17C9.12 OS=Schizosaccharomyces pombe (strain 972 / ATCC 24843) GN=SPAC17C9.12 PE=1 SV=2	474	5	C	323.263	273.653	278.337	280.721
sp|O74809|YGNJ_SCHPO	SPBC2D10.19c	Uncharacterized protein C2D10.19c OS=Schizosaccharomyces pombe (strain 972 / ATCC 24843) GN=SPBC2D10.19c PE=3 SV=1	466	5	C	149.753	208.077	1867.24	1895.78
sp|Q10367|GLO3_SCHPO	glo3	ADP-ribosylation factor GTPase-activating protein glo3 OS=Schizosaccharomyces pombe (strain 972 / ATCC 24843) GN=glo3 PE=3 SV=2	432	5	C	282.924	326.335	286.339	292.089
sp|O13614|RS10B_SCHPO	rps10b	40S ribosomal protein S10-B OS=Schizosaccharomyces pombe (strain 972 / ATCC 24843) GN=rps10b PE=3 SV=1	311	5	C	154.893	74.9221	158.967	162.652
sp|O60135|LCF1_SCHPO	lcf1	Long-chain-fatty-acid--CoA ligase 1 OS=Schizosaccharomyces pombe (strain 972 / ATCC 24843) GN=lcf1 PE=3 SV=1	961	5	C	213.203	267.329	244.696	250.661
sp|O59794|RL17B_SCHPO	rpl17b	60S ribosomal protein L17-B OS=Schizosaccharomyces pombe (strain 972 / ATCC 24843) GN=rpl17b PE=3 SV=1	191	5	C	393.343	403.254	926.234	950.065
sp|O75005|SYV_SCHPO	vas2	Valine--tRNA ligase OS=Schizosaccharomyces pombe (strain 972 / ATCC 24843) GN=vas2 PE=3 SV=1	1326	5	C	242.712	260.706	400.5	411.712
sp|O94634|THDH_SCHPO	SPBC1677.03c	Threonine dehydratase, mitochondrial OS=Schizosaccharomyces pombe (strain 972 / ATCC 24843) GN=SPBC1677.03c PE=3 SV=1	541	5	C	247.754	134.992	231.631	238.673
sp|O74548|ARGD_SCHPO	arg1	Probable acetylornithine aminotransferase, mitochondrial OS=Schizosaccharomyces pombe (strain 972 / ATCC 24843) GN=arg1 PE=2 SV=1	1171	5	C	467.772	552.88	601.782	620.143
sp|O94396|PUS1_SCHPO	pus1	tRNA pseudouridine synthase 1 OS=Schizosaccharomyces pombe (strain 972 / ATCC 24843) GN=pus1 PE=1 SV=1	458	5	C	222.117	177.767	210.03	217.081
sp|Q9UTR1|MMS19_SCHPO	mms19	DNA repair/transcription protein mms19 OS=Schizosaccharomyces pombe (strain 972 / ATCC 24843) GN=mms19 PE=3 SV=1	1151	5	C	324.135	326.022	357.45	371.55
sp|O14121|NDH1_SCHPO	SPAC3A11.07	Probable NADH-ubiquinone oxidoreductase C3A11.07, mitochondrial OS=Schizosaccharomyces pombe (strain 972 / ATCC 24843) GN=SPAC3A11.07 PE=3 SV=1	285	5	C	292.518	427.166	352.298	367.134
sp|P87240|NOT2_SCHPO	not2	General negative regulator of transcription subunit 2 OS=Schizosaccharomyces pombe (strain 972 / ATCC 24843) GN=not2 PE=1 SV=2	511	5	C	254.298	283.902	270.127	283.096
sp|Q09817|NMD3_SCHPO	nmd3	60S ribosomal export protein nmd3 OS=Schizosaccharomyces pombe (strain 972 / ATCC 24843) GN=nmd3 PE=3 SV=1	684	5	C	205.356	200.479	402.449	422.474
sp|Q9UUK7|PUR3_SCHPO	ade5	Phosphoribosylglycinamide formyltransferase OS=Schizosaccharomyces pombe (strain 972 / ATCC 24843) GN=ade5 PE=2 SV=1	180	5	C	95.5703	71.7927	97.7874	102.841
sp|O42867|RL23_SCHPO	rpl23a	60S ribosomal protein L23 OS=Schizosaccharomyces pombe (strain 972 / ATCC 24843) GN=rpl23a PE=3 SV=1	1152	5	C	132.137	177.511	295.64	311.133
sp|O94625|SPJ1_SCHPO	spj1	DnaJ-related protein spj1 OS=Schizosaccharomyces pombe (strain 972 / ATCC 24843) GN=spj1 PE=2 SV=2	275	5	C	254.631	173.48	221.126	233.106
sp|Q9UTS6|DYLT_SCHPO	dlc1	Dynein light chain Tctex-type OS=Schizosaccharomyces pombe (strain 972 / ATCC 24843) GN=dlc1 PE=1 SV=1	688	5	C	149.326	186.468	230.337	243.424
sp|P55877|IF1A_SCHPO	tif11	Eukaryotic translation initiation factor 1A OS=Schizosaccharomyces pombe (strain 972 / ATCC 24843) GN=tif11 PE=2 SV=2	995	5	C	375.453	379.261	326.787	346.574
sp|O94316|SN114_SCHPO	cwf10	Pre-mRNA-splicing factor cwf10 OS=Schizosaccharomyces pombe (strain 972 / ATCC 24843) GN=cwf10 PE=1 SV=2	200	5	C	266.959	213.749	273.731	291.794
sp|Q9Y7Z1|NOP16_SCHPO	nop16	Nucleolar protein 16 OS=Schizosaccharomyces pombe (strain 972 / ATCC 24843) GN=nop16 PE=3 SV=1	643	5	C	617.286	423.626	517.035	552.433
sp|Q42598|THRC_SCHPO	thrc	Threonine synthase OS=Schizosaccharomyces pombe (strain 972 / ATCC 24843) GN=thrc PE=1 SV=1	111	5	C	186.952	209.503	144.939	155.339
sp|O13878|UTP17_SCHPO	utp17	U3 small nucleolar RNA-associated protein 17 OS=Schizosaccharomyces pombe (strain 972 / ATCC 24843) GN=utp17 PE=3 SV=3	305	5	C	513.243	518.893	330.48	355.498
sp|O13639|SAHH_SCHPO	pi047	Adenosylhomocysteinase OS=Schizosaccharomyces pombe (strain 972 / ATCC 24843) GN=pi047 PE=3 SV=1	1475	5	C	254.071	300.445	313.495	338.449
sp|Q09719|DBP10_SCHPO	dbp10	ATP-dependent RNA helicase dbp10 OS=Schizosaccharomyces pombe (strain 972 / ATCC 24843) GN=dbp10 PE=1 SV=1	476	5	C	205.614	237.209	293.992	317.418
sp|O43032|SRPR_SCHPO	srp101	Signal recognition particle receptor subunit alpha homolog OS=Schizosaccharomyces pombe (strain 972 / ATCC 24843) GN=srp101 PE=3 SV=1	917	5	C	242.475	247.037	283.74	306.938
sp|Q9Y7Y3|YGR4_SCHPO	SPBC365.04c	Uncharacterized RNA-binding protein C365.04c OS=Schizosaccharomyces pombe (strain 972 / ATCC 24843) GN=SPBC365.04c PE=3 SV=1	263	5	C	682.675	667.033	588.876	638.581
sp|Q9P7D7|LCF2_SCHPO	lcf2	Long-chain-fatty-acid--CoA ligase 2 OS=Schizosaccharomyces pombe (strain 972 / ATCC 24843) GN=lcf2 PE=3 SV=1	306	5	C	332.373	325.81	396.817	437.03
sp|O43079|AP1B1_SCHPO	apl2	AP-1 complex subunit beta-1 OS=Schizosaccharomyces pombe (strain 972 / ATCC 24843) GN=apl2 PE=1 SV=1	661	5	C	403.068	434.178	380.23	423.795
sp|O94413|KPR2_SCHPO	SPCC1620.06c	Ribose-phosphate pyrophosphokinase 2 OS=Schizosaccharomyces pombe (strain 972 / ATCC 24843) GN=SPCC1620.06c PE=1 SV=1	602	5	C	482.624	335.289	369.405	416.405
sp|Q9UTH9|DUS3_SCHPO	dus3	tRNA-dihydrouridine(47) synthase [NAD(P)(+)] OS=Schizosaccharomyces pombe (strain 972 / ATCC 24843) GN=dus3 PE=3 SV=1	633	5	C	185.728	231.395	252.401	287.12
sp|P41820|BFR1_SCHPO	bfr1	Brefeldin A resistance protein OS=Schizosaccharomyces pombe (strain 972 / ATCC 24843) GN=bfr1 PE=1 SV=1	1033	5	C	267.451	240.098	200.796	228.779
sp|O74395|STR1_SCHPO	str1	Siderophore iron transporter 1 OS=Schizosaccharomyces pombe (strain 972 / ATCC 24843) GN=str1 PE=1 SV=1	1059	5	C	1061.84	873.946	466.764	535.047
sp|P36596|FDFT_SCHPO	erg9	Squalene synthase OS=Schizosaccharomyces pombe (strain 972 / ATCC 24843) GN=erg9 PE=1 SV=1	317	5	C	208.361	368.195	220.422	253.23
sp|Q10138|YAS2_SCHPO	SPAC3H8.02	CRAL-TRIO domain-containing protein C3H8.02 OS=Schizosaccharomyces pombe (strain 972 / ATCC 24843) GN=SPAC3H8.02 PE=1 SV=1	758	5	C	482.358	466.962	565.476	649.66
sp|O74830|YC12_SCHPO	SPCC1183.02	Putative glutathione S-transferase C1183.02 OS=Schizosaccharomyces pombe (strain 972 / ATCC 24843) GN=SPCC1183.02 PE=3 SV=1	1132	5	C	287.771	253.714	272.964	314.648
sp|P19117|IPYR_SCHPO	ppa1	Inorganic pyrophosphatase OS=Schizosaccharomyces pombe (strain 972 / ATCC 24843) GN=ppa1 PE=3 SV=2	896	5	C	466.231	367.627	364.516	420.965
sp|Q10081|YAO2_SCHPO	SPAC11D3.02c	UPF0039 protein C11D3.02c OS=Schizosaccharomyces pombe (strain 972 / ATCC 24843) GN=SPAC11D3.02c PE=3 SV=1	998	5	C	234.809	242.834	297.171	346.3
sp|P32235|GTP1_SCHPO	gtp1	GTP-binding protein 1 OS=Schizosaccharomyces pombe (strain 972 / ATCC 24843) GN=gtp1 PE=3 SV=2	488	5	C	219.152	228.86	247.349	289.531
sp|O43012|DCTD_SCHPO	SPBC2G2.13c	Deoxycytidylate deaminase OS=Schizosaccharomyces pombe (strain 972 / ATCC 24843) GN=SPBC2G2.13c PE=3 SV=2	638	5	C	1609.25	1234.12	238.245	279.935
sp|O94667|RTF1_SCHPO	SPBC651.09c	RNA polymerase-associated protein C651.09c OS=Schizosaccharomyces pombe (strain 972 / ATCC 24843) GN=SPBC651.09c PE=1 SV=1	770	5	C	193.272	158.812	246.627	289.923
sp|Q9UU81|AP1G1_SCHPO	apl4	AP-1 complex subunit gamma-1 OS=Schizosaccharomyces pombe (strain 972 / ATCC 24843) GN=apl4 PE=3 SV=1	361	5	C	194.401	228.488	272.783	321.428
sp|Q9USJ7|ETT1_SCHPO	nro1	Negative regulator of ofd1 OS=Schizosaccharomyces pombe (strain 972 / ATCC 24843) GN=nro1 PE=1 SV=1	487	5	C	137.864	167.65	185.024	218.895
sp|P87216|VIPI_SCHPO	vip1	Protein vip1 OS=Schizosaccharomyces pombe (strain 972 / ATCC 24843) GN=vip1 PE=1 SV=1	363	5	C	280.567	339.026	231.63	275.304
sp|Q9UTJ2|PMM_SCHPO	pmm1	Phosphomannomutase OS=Schizosaccharomyces pombe (strain 972 / ATCC 24843) GN=pmm1 PE=2 SV=1	946	5	C	365.435	415.193	332.286	399.466
sp|O94288|NOC3_SCHPO	noc3	Nucleolar complex-associated protein 3 OS=Schizosaccharomyces pombe (strain 972 / ATCC 24843) GN=noc3 PE=1 SV=1	877	5	C	159.982	198.143	205.068	247.302
sp|O13636|TIM50_SCHPO	tim50	Mitochondrial import inner membrane translocase subunit tim50 OS=Schizosaccharomyces pombe (strain 972 / ATCC 24843) GN=tim50 PE=3 SV=1	760	5	C	248.847	306.653	262.357	317.584
sp|P78937|MET3_SCHPO	sua1	Sulfate adenylyltransferase OS=Schizosaccharomyces pombe (strain 972 / ATCC 24843) GN=sua1 PE=1 SV=2	257	5	C	175.5	86.1699	218.603	266.208
sp|O74836|RL1B_SCHPO	rpl1b	60S ribosomal protein L1-B OS=Schizosaccharomyces pombe (strain 972 / ATCC 24843) GN=rpl1b PE=1 SV=1	1128	5	C	325	153.865	403.63	549.337
sp|P40381|SWI6_SCHPO	swi6	Chromatin-associated protein swi6 OS=Schizosaccharomyces pombe (strain 972 / ATCC 24843) GN=swi6 PE=1 SV=1	920	4	C	69.3567	27.7886	140.139	32.0693
sp|P09988|H31_SCHPO	hht1	Histone H3.1/H3.2 OS=Schizosaccharomyces pombe (strain 972 / ATCC 24843) GN=hht1 PE=1 SV=2	56	4	C	765.604	507.403	560.074	386.568
sp|O74958|MMI1_SCHPO	mmi1	YTH domain-containing protein mmi1 OS=Schizosaccharomyces pombe (strain 972 / ATCC 24843) GN=mmi1 PE=1 SV=3	1419	4	C	176.441	119.843	166.348	115.534
sp|O94259|UTP16_SCHPO	utp16	Probable U3 small nucleolar RNA-associated protein 16 OS=Schizosaccharomyces pombe (strain 972 / ATCC 24843) GN=utp16 PE=1 SV=2	1049	4	C	198.389	159.887	154.661	125.707
sp|P87128|EIF3J_SCHPO	SPAC3A12.13c	Probable eukaryotic translation initiation factor 3 subunit J OS=Schizosaccharomyces pombe (strain 972 / ATCC 24843) GN=SPAC3A12.13c PE=1 SV=2	119	4	C	570.552	392.958	352.156	292.123
sp|Q9USM4|LUC7_SCHPO	usp106	U1 snRNP-associated protein usp106 OS=Schizosaccharomyces pombe (strain 972 / ATCC 24843) GN=usp106 PE=1 SV=1	776	4	C	243.293	158.107	217.696	182.793
sp|O42940|PHO88_SCHPO	pho88	Inorganic phosphate transport protein pho88 OS=Schizosaccharomyces pombe (strain 972 / ATCC 24843) GN=pho88 PE=3 SV=2	1199	4	C	189.132	237.208	256.494	217.481
sp|P41390|PUR1_SCHPO	ade4	Amidophosphoribosyltransferase OS=Schizosaccharomyces pombe (strain 972 / ATCC 24843) GN=ade4 PE=1 SV=1	744	4	C	265.492	242.708	256.821	217.828
sp|O74627|CG1C_SCHPO	pch1	Cyclin pch1 OS=Schizosaccharomyces pombe (strain 972 / ATCC 24843) GN=pch1 PE=1 SV=1	1241	4	C	396.567	320.289	397.23	338.953
sp|O94686|RL43B_SCHPO	rpl43b	60S ribosomal protein L43-B OS=Schizosaccharomyces pombe (strain 972 / ATCC 24843) GN=rpl43b PE=3 SV=1	1281	4	C	796.874	442.169	1454.8	1263.53
sp|O94449|RFC4_SCHPO	rfc4	Replication factor C subunit 4 OS=Schizosaccharomyces pombe (strain 972 / ATCC 24843) GN=rfc4 PE=1 SV=1	955	4	C	267.427	381.732	249.291	222.03
sp|O43018|YGV4_SCHPO	SPBC354.04	Uncharacterized protein C354.04 OS=Schizosaccharomyces pombe (strain 972 / ATCC 24843) GN=SPBC354.04 PE=4 SV=1	96	4	C	308.302	188.568	256.623	229.598
sp|O59823|VATD_SCHPO	vma8	V-type proton ATPase subunit D OS=Schizosaccharomyces pombe (strain 972 / ATCC 24843) GN=vma8 PE=1 SV=1	842	4	C	260.296	132.232	215.498	193.698
sp|O13801|YE04_SCHPO	SPAC17H9.04c	Uncharacterized RNA-binding protein C17H9.04c OS=Schizosaccharomyces pombe (strain 972 / ATCC 24843) GN=SPAC17H9.04c PE=1 SV=1	300	4	C	270.207	329.484	284.729	256.954
sp|Q10368|YDBI_SCHPO	SPAC22E12.18	Uncharacterized protein C22E12.18 OS=Schizosaccharomyces pombe (strain 972 / ATCC 24843) GN=SPAC22E12.18 PE=1 SV=1	840	4	C	443.757	344.291	308.276	278.238
sp|O42854|YFHH_SCHPO	SPAC23A1.17	SH3 domain-containing protein C23A1.17 OS=Schizosaccharomyces pombe (strain 972 / ATCC 24843) GN=SPAC23A1.17 PE=1 SV=1	701	4	C	318.75	240.876	237.309	214.597
sp|O60059|YG58_SCHPO	SPBC56F2.08c	Pumilio domain-containing protein C56F2.08c OS=Schizosaccharomyces pombe (strain 972 / ATCC 24843) GN=SPBC56F2.08c PE=1 SV=1	1260	4	C	224.287	240.198	309.781	281.553
sp|O42964|IWS1_SCHPO	iws1	Transcription factor iws1 OS=Schizosaccharomyces pombe (strain 972 / ATCC 24843) GN=iws1 PE=3 SV=1	1259	4	C	110.852	102.378	131.377	119.718
sp|Q9P3B2|RCF2_SCHPO	rcf2	Respiratory supercomplex factor 2 homolog C1565.01 OS=Schizosaccharomyces pombe (strain 972 / ATCC 24843) GN=rcf2 PE=3 SV=1	1083	4	C	191.982	187.056	207.884	189.512
sp|O94447|SLM1_SCHPO	slm1	Cytoskeletal signaling protein slm1 OS=Schizosaccharomyces pombe (strain 972 / ATCC 24843) GN=slm1 PE=1 SV=1	325	4	C	237.742	258.692	218.866	199.587
sp|O14340|YB35_SCHPO	SPBC2F12.05c	Oxysterol-binding protein homolog C2F12.05c OS=Schizosaccharomyces pombe (strain 972 / ATCC 24843) GN=SPBC2F12.05c PE=1 SV=2	894	4	C	247.518	158.151	223.24	203.888
sp|Q8TFH3|OST3_SCHPO	ost3	Dolichyl-diphosphooligosaccharide--protein glycosyltransferase subunit 3 OS=Schizosaccharomyces pombe (strain 972 / ATCC 24843) GN=ost3 PE=3 SV=1	350	4	C	783.965	661.372	684.362	630.204
sp|O13861|TCD_SCHPO	SPAC1A6.10	tRNA threonylcarbamoyladenosine dehydratase OS=Schizosaccharomyces pombe (strain 972 / ATCC 24843) GN=SPAC1A6.10 PE=3 SV=1	846	4	C	184.305	185.548	300.814	277.38
sp|Q9UU78|RLA5_SCHPO	rpa5	60S acidic ribosomal protein P1-alpha 5 OS=Schizosaccharomyces pombe (strain 972 / ATCC 24843) GN=rpa5 PE=1 SV=1	54	4	C	244.546	260.419	476.438	442.754
sp|O60079|UBP12_SCHPO	ubp12	Probable ubiquitin carboxyl-terminal hydrolase 12 OS=Schizosaccharomyces pombe (strain 972 / ATCC 24843) GN=ubp12 PE=1 SV=1	676	4	C	638.356	280.124	964.946	900.75
sp|Q09191|RPAB1_SCHPO	rpb5	DNA-directed RNA polymerases I, II, and III subunit RPABC1 OS=Schizosaccharomyces pombe (strain 972 / ATCC 24843) GN=rpb5 PE=1 SV=1	1232	4	C	321.827	305.311	306.436	287.887
sp|Q10185|ABC2_SCHPO	abc2	ATP-binding cassette transporter abc2 OS=Schizosaccharomyces pombe (strain 972 / ATCC 24843) GN=abc2 PE=1 SV=1	377	4	C	183.583	523.162	179.57	168.765
sp|Q09868|CIP2_SCHPO	cip2	RNA-binding post-transcriptional regulator cip2 OS=Schizosaccharomyces pombe (strain 972 / ATCC 24843) GN=cip2 PE=1 SV=1	897	4	C	144.984	172.245	154.069	145.002
sp|O14187|SPP42_SCHPO	spp42	Pre-mRNA-splicing factor spp42 OS=Schizosaccharomyces pombe (strain 972 / ATCC 24843) GN=spp42 PE=1 SV=1	380	4	C	307.084	312.646	314.085	296.916
sp|O13844|YFG5_SCHPO	SPAC19G12.05	Uncharacterized mitochondrial carrier C19G12.05 OS=Schizosaccharomyces pombe (strain 972 / ATCC 24843) GN=SPAC19G12.05 PE=3 SV=1	1090	4	C	290.103	328.428	352.302	334.804
sp|Q10193|SRP1_SCHPO	srp1	Pre-mRNA-splicing factor srp1 OS=Schizosaccharomyces pombe (strain 972 / ATCC 24843) GN=srp1 PE=1 SV=3	615	4	C	499.212	535.87	476.994	453.764
sp|Q9P7C0|YKU5_SCHPO	SPAC2E1P5.05	Uncharacterized WD repeat-containing protein C2E1P5.05 OS=Schizosaccharomyces pombe (strain 972 / ATCC 24843) GN=SPAC2E1P5.05 PE=3 SV=1	1002	4	C	302.015	493.682	381.93	363.569
sp|Q9P6R2|YOH8_SCHPO	SPBC13E7.08c	Uncharacterized protein C13E7.08c OS=Schizosaccharomyces pombe (strain 972 / ATCC 24843) GN=SPBC13E7.08c PE=3 SV=1	1293	4	C	172.583	156.782	160.646	153.21
sp|O13722|TAF12_SCHPO	taf12	Transcription initiation factor TFIID subunit 12 OS=Schizosaccharomyces pombe (strain 972 / ATCC 24843) GN=taf12 PE=1 SV=1	859	4	C	159.901	156.034	170.687	164.073
sp|O74351|NFS1_SCHPO	SPBC21D10.11c	Probable cysteine desulfurase, mitochondrial OS=Schizosaccharomyces pombe (strain 972 / ATCC 24843) GN=SPBC21D10.11c PE=3 SV=2	1143	4	C	208.7	251.276	200.811	193.552
sp|P17610|YPT3_SCHPO	ypt3	GTP-binding protein ypt3 OS=Schizosaccharomyces pombe (strain 972 / ATCC 24843) GN=ypt3 PE=1 SV=1	486	4	C	309.312	261.534	239.861	232.251
sp|Q9UTT1|UBP21_SCHPO	ubp21	Ubiquitin carboxyl-terminal hydrolase 21 OS=Schizosaccharomyces pombe (strain 972 / ATCC 24843) GN=ubp21 PE=3 SV=2	1057	4	C	123.741	116.076	169.604	164.266
sp|Q1MTQ9|NIP7_SCHPO	nip7	60S ribosome subunit biogenesis protein nip7 OS=Schizosaccharomyces pombe (strain 972 / ATCC 24843) GN=nip7 PE=3 SV=1	1343	4	C	249.465	166.36	220.182	214.738
sp|Q10143|PFD3_SCHPO	SPAC3H8.07c	Probable prefoldin subunit 3 OS=Schizosaccharomyces pombe (strain 972 / ATCC 24843) GN=SPAC3H8.07c PE=3 SV=1	493	4	C	154.723	156.637	145.443	142.061
sp|P41003|SMC2_SCHPO	cut14	Structural maintenance of chromosomes protein 2 OS=Schizosaccharomyces pombe (strain 972 / ATCC 24843) GN=cut14 PE=1 SV=2	491	4	C	199.699	193.335	281.341	275.028
sp|O14233|RNA14_SCHPO	rna14	mRNA 3'-end-processing protein rna14 OS=Schizosaccharomyces pombe (strain 972 / ATCC 24843) GN=rna14 PE=3 SV=1	334	4	C	173.399	186.379	203.791	199.455
sp|O74891|COPZ_SCHPO	ret3	Probable coatomer subunit zeta OS=Schizosaccharomyces pombe (strain 972 / ATCC 24843) GN=ret3 PE=3 SV=1	943	4	C	477.565	495.568	480.33	471.658
sp|O94375|REXO4_SCHPO	rex4	RNA exonuclease 4 OS=Schizosaccharomyces pombe (strain 972 / ATCC 24843) GN=rex4 PE=3 SV=1	1003	4	C	206.991	155.675	153.846	151.745
sp|O74536|SNF1_SCHPO	ssp2	SNF1-like protein kinase ssp2 OS=Schizosaccharomyces pombe (strain 972 / ATCC 24843) GN=ssp2 PE=1 SV=1	748	4	C	155.579	160.982	211.565	209.714
sp|Q9P4W9|RS4C_SCHPO	rps4c	40S ribosomal protein S4-C OS=Schizosaccharomyces pombe (strain 972 / ATCC 24843) GN=rps4c PE=1 SV=1	1085	4	C	128.525	122.783	235.621	234.223
sp|Q10318|ILV3_SCHPO	SPAC17G8.06c	Putative dihydroxy-acid dehydratase, mitochondrial OS=Schizosaccharomyces pombe (strain 972 / ATCC 24843) GN=SPAC17G8.06c PE=2 SV=1	952	4	C	153.823	120.467	158.624	157.684
sp|Q4LB35|FOL1_SCHPO	fol1	Folic acid synthesis protein fol1 OS=Schizosaccharomyces pombe (strain 972 / ATCC 24843) GN=fol1 PE=1 SV=2	965	4	C	2467.24	1447.41	198.089	198.905
sp|O14018|SYSC_SCHPO	SPAC29A4.15	Serine--tRNA ligase, cytoplasmic OS=Schizosaccharomyces pombe (strain 972 / ATCC 24843) GN=SPAC29A4.15 PE=3 SV=1	903	4	C	196.021	256.469	194.628	195.998
sp|O59678|RRS1_SCHPO	SPBC29A3.16	Ribosome biogenesis regulatory protein homolog OS=Schizosaccharomyces pombe (strain 972 / ATCC 24843) GN=SPBC29A3.16 PE=1 SV=1	782	4	C	103.837	74.0405	444.378	447.98
sp|O14044|PNO1_SCHPO	rbp28	Pre-rRNA-processing protein pno1 OS=Schizosaccharomyces pombe (strain 972 / ATCC 24843) GN=rbp28 PE=1 SV=2	639	4	C	297.79	288.748	470.297	474.253
sp|Q10104|GLYM_SCHPO	shm2	Serine hydroxymethyltransferase, mitochondrial OS=Schizosaccharomyces pombe (strain 972 / ATCC 24843) GN=shm2 PE=3 SV=2	330	4	C	297.846	313.841	493.028	500.199
sp|Q9UTE6|MAK16_SCHPO	mak16	Protein mak16 OS=Schizosaccharomyces pombe (strain 972 / ATCC 24843) GN=mak16 PE=3 SV=1	362	4	C	169.254	193.011	326.941	333.01
sp|O94436|TAF14_SCHPO	tfg3	Transcription initiation factor TFIID subunit 14 OS=Schizosaccharomyces pombe (strain 972 / ATCC 24843) GN=tfg3 PE=1 SV=1	401	4	C	130.572	150.257	329.659	336.429
sp|Q9USS7|YNB3_SCHPO	SPBC4.03c	Uncharacterized protein C4.03c OS=Schizosaccharomyces pombe (strain 972 / ATCC 24843) GN=SPBC4.03c PE=2 SV=1	947	4	C	103.032	126.273	192.911	197.424
sp|P36592|RAD22_SCHPO	rad22	DNA repair and recombination protein rad22 OS=Schizosaccharomyces pombe (strain 972 / ATCC 24843) GN=rad22 PE=1 SV=2	18	4	C	1186.5	690.32	111.886	114.715
sp|Q96WV9|CDK9_SCHPO	cdk9	Probable cyclin-dependent kinase 9 OS=Schizosaccharomyces pombe (strain 972 / ATCC 24843) GN=cdk9 PE=1 SV=1	1220	4	C	264.517	199.51	354.779	364.038
sp|Q09740|GFA1_SCHPO	SPBC12C2.11	Probable glutamine--fructose-6-phosphate aminotransferase [isomerizing] OS=Schizosaccharomyces pombe (strain 972 / ATCC 24843) GN=SPBC12C2.11 PE=3 SV=2	681	4	C	126.082	179.896	176.04	180.919
sp|Q9P7C1|YKU3_SCHPO	SPAC2E1P5.03	Uncharacterized J domain-containing protein C2E1P5.03 OS=Schizosaccharomyces pombe (strain 972 / ATCC 24843) GN=SPAC2E1P5.03 PE=3 SV=1	454	4	C	301.317	317.959	378.138	389.79
sp|P50524|RPN12_SCHPO	rpn12	26S proteasome regulatory subunit rpn12 OS=Schizosaccharomyces pombe (strain 972 / ATCC 24843) GN=rpn12 PE=1 SV=1	890	4	C	330.419	427.586	409.749	422.428
sp|O94683|RRP7_SCHPO	rrp7	Ribosomal RNA-processing protein 7 OS=Schizosaccharomyces pombe (strain 972 / ATCC 24843) GN=rrp7 PE=3 SV=2	1357	4	C	173.822	128.443	276.752	285.549
sp|P04913|H2B1_SCHPO	htb1	Histone H2B-alpha OS=Schizosaccharomyces pombe (strain 972 / ATCC 24843) GN=htb1 PE=1 SV=3	1249	4	C	371.869	355.336	467.776	483.275
sp|O13810|PROB_SCHPO	SPAC17H9.13c	Probable glutamate 5-kinase OS=Schizosaccharomyces pombe (strain 972 / ATCC 24843) GN=SPAC17H9.13c PE=3 SV=1	414	4	C	432.926	227.484	289.18	299.078
sp|Q9UTS7|ASPG2_SCHPO	SPAC977.12	Probable L-asparaginase 2 OS=Schizosaccharomyces pombe (strain 972 / ATCC 24843) GN=SPAC977.12 PE=3 SV=1	1234	4	C	233.187	220.68	255.247	264.699
sp|Q9Y7L1|YGI9_SCHPO	SPBC2A9.09	Phosducin-like protein C2A9.09 OS=Schizosaccharomyces pombe (strain 972 / ATCC 24843) GN=SPBC2A9.09 PE=1 SV=2	732	4	C	132.949	174.698	206.454	216.215
sp|O36032|GLRX1_SCHPO	grx1	Glutaredoxin-1 OS=Schizosaccharomyces pombe (strain 972 / ATCC 24843) GN=grx1 PE=3 SV=1	494	4	C	432.574	814.791	279.912	293.186
sp|O14241|ARPC2_SCHPO	arc2	Actin-related protein 2/3 complex subunit 2 OS=Schizosaccharomyces pombe (strain 972 / ATCC 24843) GN=arc2 PE=1 SV=1	790	4	C	151.275	162.154	180.413	189.485
sp|Q92462|PUB1_SCHPO	pub1	E3 ubiquitin-protein ligase pub1 OS=Schizosaccharomyces pombe (strain 972 / ATCC 24843) GN=pub1 PE=1 SV=2	755	4	C	348.415	283.215	206.711	217.623
sp|Q9UTE0|SEY1_SCHPO	sey1	Protein sey1 OS=Schizosaccharomyces pombe (strain 972 / ATCC 24843) GN=sey1 PE=1 SV=1	556	4	C	207.263	291.173	214.71	228.054
sp|Q10233|RPC2_SCHPO	rpc2	DNA-directed RNA polymerase III subunit RPC2 OS=Schizosaccharomyces pombe (strain 972 / ATCC 24843) GN=rpc2 PE=2 SV=1	459	4	C	188.682	221.498	160.591	171.328
sp|P32747|PYRD_SCHPO	ura3	Dihydroorotate dehydrogenase (quinone), mitochondrial OS=Schizosaccharomyces pombe (strain 972 / ATCC 24843) GN=ura3 PE=1 SV=1	621	4	C	370.301	322.56	390.215	416.707
sp|O94721|YCF9_SCHPO	SPCC1393.09c	RWD domain-containing protein C1393.09c OS=Schizosaccharomyces pombe (strain 972 / ATCC 24843) GN=SPCC1393.09c PE=3 SV=1	888	4	C	261.353	266.568	245.36	262.678
sp|O60182|RFC1_SCHPO	rfc1	Replication factor C subunit 1 OS=Schizosaccharomyces pombe (strain 972 / ATCC 24843) GN=rfc1 PE=1 SV=1	590	4	C	238.781	269.022	298.777	320.315
sp|O60064|YBB2_SCHPO	SPBC13G1.02	Probable mannose-1-phosphate guanyltransferase OS=Schizosaccharomyces pombe (strain 972 / ATCC 24843) GN=SPBC13G1.02 PE=3 SV=1	341	4	C	162.444	212.76	153.1	164.268
sp|Q9UTN6|SNF21_SCHPO	snf21	Chromatin structure-remodeling complex subunit snf21 OS=Schizosaccharomyces pombe (strain 972 / ATCC 24843) GN=snf21 PE=1 SV=1	665	4	C	96.9446	174.012	157.013	168.651
sp|O94697|RFC5_SCHPO	rfc5	Replication factor C subunit 5 OS=Schizosaccharomyces pombe (strain 972 / ATCC 24843) GN=rfc5 PE=1 SV=1	839	4	C	181.358	166.236	238.146	255.81
sp|Q02088|TPM_SCHPO	cdc8	Tropomyosin OS=Schizosaccharomyces pombe (strain 972 / ATCC 24843) GN=cdc8 PE=3 SV=1	165	4	C	248.928	203.177	237.695	255.563
sp|Q10169|DSK2_SCHPO	dph1	Deubiquitination-protection protein dph1 OS=Schizosaccharomyces pombe (strain 972 / ATCC 24843) GN=dph1 PE=3 SV=1	427	4	C	1280.11	2039.4	605.044	655.16
sp|O59817|EFR3_SCHPO	efr3	Protein efr3 OS=Schizosaccharomyces pombe (strain 972 / ATCC 24843) GN=efr3 PE=1 SV=1	1074	4	C	518.182	479.424	641.316	698.492
sp|Q8WZJ7|C1TC_SCHPO	SPBC839.16	C-1-tetrahydrofolate synthase, cytoplasmic OS=Schizosaccharomyces pombe (strain 972 / ATCC 24843) GN=SPBC839.16 PE=3 SV=1	693	4	C	234.334	250.63	288.907	314.904
sp|O13809|YE0C_SCHPO	SPAC17H9.12c	Uncharacterized FAD-binding protein C17H9.12c OS=Schizosaccharomyces pombe (strain 972 / ATCC 24843) GN=SPAC17H9.12c PE=3 SV=1	941	4	C	217.114	192.506	221.236	241.208
sp|O13656|TOM40_SCHPO	tom40	Probable mitochondrial import receptor subunit tom40 OS=Schizosaccharomyces pombe (strain 972 / ATCC 24843) GN=tom40 PE=3 SV=3	424	4	C	136.762	168.049	218.255	238.818
sp|O59771|KCY_SCHPO	SPCC1795.05c	Uridylate kinase OS=Schizosaccharomyces pombe (strain 972 / ATCC 24843) GN=SPCC1795.05c PE=3 SV=1	517	4	C	135.722	269.584	163.581	179.037
sp|Q9Y7X4|YGRG_SCHPO	SPBC365.16	Uncharacterized membrane protein C365.16 OS=Schizosaccharomyces pombe (strain 972 / ATCC 24843) GN=SPBC365.16 PE=4 SV=1	1179	4	C	240.337	253.345	264.541	289.887
sp|P78763|YG1D_SCHPO	SPBC83.13	Uncharacterized mitochondrial carrier C83.13 OS=Schizosaccharomyces pombe (strain 972 / ATCC 24843) GN=SPBC83.13 PE=2 SV=2	1242	4	C	273.455	296.328	236.872	260.255
sp|O60122|TRPD_SCHPO	trp4	Anthranilate phosphoribosyltransferase OS=Schizosaccharomyces pombe (strain 972 / ATCC 24843) GN=trp4 PE=3 SV=1	141	4	C	288.979	283.234	289.768	318.445
sp|O94536|UCP12_SCHPO	ucp12	Putative ATP-dependent RNA helicase ucp12 OS=Schizosaccharomyces pombe (strain 972 / ATCC 24843) GN=ucp12 PE=3 SV=1	874	4	C	191.464	224.942	218.915	240.746
sp|O13827|YEEB_SCHPO	SPAC19A8.11c	Uncharacterized protein C19A8.11c OS=Schizosaccharomyces pombe (strain 972 / ATCC 24843) GN=SPAC19A8.11c PE=1 SV=1	642	4	C	458.643	358.877	289.178	319.895
sp|O94435|MUG35_SCHPO	mug35	Meiotically up-regulated gene 35 protein OS=Schizosaccharomyces pombe (strain 972 / ATCC 24843) GN=mug35 PE=1 SV=2	819	4	C	191.703	204.231	180.012	201.005
sp|Q09822|CDC15_SCHPO	cdc15	Cell division control protein 15 OS=Schizosaccharomyces pombe (strain 972 / ATCC 24843) GN=cdc15 PE=1 SV=2	472	4	C	170.917	210.773	167.512	187.714
sp|Q8TFH1|RL18B_SCHPO	rpl18b	60S ribosomal protein L18-B OS=Schizosaccharomyces pombe (strain 972 / ATCC 24843) GN=rpl18b PE=1 SV=1	239	4	C	80.0238	142.896	141.865	159.266
sp|P87313|TMA20_SCHPO	tma20	Translation machinery-associated protein 20 OS=Schizosaccharomyces pombe (strain 972 / ATCC 24843) GN=tma20 PE=3 SV=5	1116	4	C	292.063	367.388	335.517	377.333
sp|Q9C0Y6|YKM8_SCHPO	SPAPB24D3.08c	Zinc-type alcohol dehydrogenase-like protein PB24D3.08c OS=Schizosaccharomyces pombe (strain 972 / ATCC 24843) GN=SPAPB24D3.08c PE=3 SV=1	235	4	C	74.7114	57.0267	80.5727	90.8914
sp|O14092|HEM1_SCHPO	hem1	5-aminolevulinate synthase, mitochondrial OS=Schizosaccharomyces pombe (strain 972 / ATCC 24843) GN=hem1 PE=3 SV=1	1	4	C	397.556	333.514	374.017	424.225
sp|Q9US13|RPN9_SCHPO	rpn9	Probable 26S proteasome regulatory subunit rpn9 OS=Schizosaccharomyces pombe (strain 972 / ATCC 24843) GN=rpn9 PE=3 SV=1	120	4	C	130.775	152.974	183.137	208.234
sp|O94700|MBF1_SCHPO	mbf1	Multiprotein-bridging factor 1 OS=Schizosaccharomyces pombe (strain 972 / ATCC 24843) GN=mbf1 PE=3 SV=1	225	4	C	201.12	213.835	222.109	253.496
sp|Q02592|HMT1_SCHPO	hmt1	Heavy metal tolerance protein OS=Schizosaccharomyces pombe (strain 972 / ATCC 24843) GN=hmt1 PE=2 SV=3	792	4	C	281.954	363.999	329.59	376.482
sp|O36022|MNN9_SCHPO	mnn9	Mannan polymerase complex subunit mnn9 OS=Schizosaccharomyces pombe (strain 972 / ATCC 24843) GN=mnn9 PE=3 SV=1	793	4	C	158.123	159.507	158.335	183.307
sp|Q09843|RFC2_SCHPO	rfc2	Replication factor C subunit 2 OS=Schizosaccharomyces pombe (strain 972 / ATCC 24843) GN=rfc2 PE=1 SV=1	1301	4	C	360.005	349.252	170.678	202.979
sp|Q9Y7N9|YCKC_SCHPO	SPCC1450.12	PX domain-containing protein C1450.12 OS=Schizosaccharomyces pombe (strain 972 / ATCC 24843) GN=SPCC1450.12 PE=1 SV=1	40	4	C	180.607	251.723	218.822	260.969
sp|O59827|GST2_SCHPO	gst2	Glutathione S-transferase 2 OS=Schizosaccharomyces pombe (strain 972 / ATCC 24843) GN=gst2 PE=2 SV=1	605	4	C	69.4229	76.3451	90.7975	108.324
sp|P40235|HHP1_SCHPO	hhp1	Casein kinase I homolog hhp1 OS=Schizosaccharomyces pombe (strain 972 / ATCC 24843) GN=hhp1 PE=2 SV=1	712	4	C	219.972	251.75	298.958	356.928
sp|O42926|VP13B_SCHPO	vps13b	Vacuolar protein sorting-associated protein 13b OS=Schizosaccharomyces pombe (strain 972 / ATCC 24843) GN=vps13b PE=2 SV=1	164	4	C	403.912	852.127	496.317	593.495
sp|O94273|PPIB_SCHPO	cyp4	Peptidyl-prolyl cis-trans isomerase B OS=Schizosaccharomyces pombe (strain 972 / ATCC 24843) GN=cyp4 PE=3 SV=1	1580	4	C	153.389	238.832	184.992	221.504
sp|Q9UTA6|YL8C_SCHPO	SPAC25B8.12c	Uncharacterized hydrolase C25B8.12c OS=Schizosaccharomyces pombe (strain 972 / ATCC 24843) GN=SPAC25B8.12c PE=1 SV=1	1211	4	C	136.832	119.491	124.676	149.881
sp|O60125|BAG1A_SCHPO	bag101	BAG family molecular chaperone regulator 1A OS=Schizosaccharomyces pombe (strain 972 / ATCC 24843) GN=bag101 PE=2 SV=1	124	4	C	303.33	263.615	333.421	405.233
sp|P87167|BUT2_SCHPO	but2	Uba3-binding protein but2 OS=Schizosaccharomyces pombe (strain 972 / ATCC 24843) GN=but2 PE=1 SV=1	1296	4	C	497.784	418.538	184.701	225.132
sp|O13685|UBC13_SCHPO	ubc13	Ubiquitin-conjugating enzyme E2 13 OS=Schizosaccharomyces pombe (strain 972 / ATCC 24843) GN=ubc13 PE=1 SV=1	866	4	C	159.733	282.865	156.626	191.15
sp|Q02787|PURA_SCHPO	ade2	Adenylosuccinate synthetase OS=Schizosaccharomyces pombe (strain 972 / ATCC 24843) GN=ade2 PE=1 SV=2	90	4	C	201.603	164.158	160.712	197.749
sp|P33075|KAD2_SCHPO	adk1	Adenylate kinase OS=Schizosaccharomyces pombe (strain 972 / ATCC 24843) GN=adk1 PE=1 SV=1	656	4	C	120.977	102.373	87.4349	108.075
sp|P87308|LSB5_SCHPO	lsb5	Protein lsb5 OS=Schizosaccharomyces pombe (strain 972 / ATCC 24843) GN=lsb5 PE=3 SV=1	433	4	C	460.101	395.214	201.124	252.266
sp|O59680|CY1_SCHPO	cyt1	Cytochrome c1, heme protein, mitochondrial OS=Schizosaccharomyces pombe (strain 972 / ATCC 24843) GN=cyt1 PE=3 SV=1	863	4	C	183.863	207.481	197.488	250.21
sp|Q9HE05|UFD2_SCHPO	ufd2	Ubiquitin conjugation factor E4 OS=Schizosaccharomyces pombe (strain 972 / ATCC 24843) GN=ufd2 PE=2 SV=1	501	4	C	156.943	196.875	171.344	218.457
sp|Q9HDW6|VATC_SCHPO	vma5	V-type proton ATPase subunit C OS=Schizosaccharomyces pombe (strain 972 / ATCC 24843) GN=vma5 PE=1 SV=1	1350	4	C	131.864	117.017	119.499	152.991
sp|Q09713|YA36_SCHPO	SPAC18B11.06	Uncharacterized protein C18B11.06 OS=Schizosaccharomyces pombe (strain 972 / ATCC 24843) GN=SPAC18B11.06 PE=1 SV=1	437	4	C	155.25	203.945	94.5584	135.009
sp|Q9UU85|PPK38_SCHPO	ppk38	Protein kinase domain-containing protein ppk38 OS=Schizosaccharomyces pombe (strain 972 / ATCC 24843) GN=ppk38 PE=3 SV=1	586	4	C	873.173	578.798	163.442	244.73
sp|Q9P3U7|GHT8_SCHPO	ght8	Probable high-affinity hexose transporter ght8, mitochondrial OS=Schizosaccharomyces pombe (strain 972 / ATCC 24843) GN=ght8 PE=1 SV=1	345	3	C	406.933	271.255	280.287	190.09
sp|O74969|GHT2_SCHPO	ght2	High-affinity glucose transporter ght2 OS=Schizosaccharomyces pombe (strain 972 / ATCC 24843) GN=ght2 PE=1 SV=1	1174	3	C	100.424	79.4252	69.2349	49.8943
sp|Q09914|RHO1_SCHPO	rho1	GTP-binding protein rho1 OS=Schizosaccharomyces pombe (strain 972 / ATCC 24843) GN=rho1 PE=2 SV=1	1056	3	C	273.524	430.674	203.723	147.31
sp|O59739|BAG1B_SCHPO	bag102	BAG family molecular chaperone regulator 1B OS=Schizosaccharomyces pombe (strain 972 / ATCC 24843) GN=bag102 PE=1 SV=1	543	3	C	151.98	110.334	129.971	97.3336
sp|Q9UT24|BRR2_SCHPO	brr2	Pre-mRNA-splicing factor brr2 OS=Schizosaccharomyces pombe (strain 972 / ATCC 24843) GN=brr2 PE=1 SV=1	123	3	C	818.999	259.312	148.328	112.33
sp|Q9US07|ARP8_SCHPO	SPAC664.02c	Probable actin-related protein 8 OS=Schizosaccharomyces pombe (strain 972 / ATCC 24843) GN=SPAC664.02c PE=1 SV=2	1366	3	C	60.1473	64.251	90.4105	69.5461
sp|O74499|LSM7_SCHPO	lsm7	U6 snRNA-associated Sm-like protein LSm7 OS=Schizosaccharomyces pombe (strain 972 / ATCC 24843) GN=lsm7 PE=1 SV=1	1238	3	C	136.62	82.2415	274.734	215.397
sp|O74975|PCY1_SCHPO	SPCC1827.02c	Probable choline-phosphate cytidylyltransferase OS=Schizosaccharomyces pombe (strain 972 / ATCC 24843) GN=SPCC1827.02c PE=1 SV=3	991	3	C	137.885	66.735	96.3932	76.0308
sp|P36586|YPT5_SCHPO	ypt5	GTP-binding protein ypt5 OS=Schizosaccharomyces pombe (strain 972 / ATCC 24843) GN=ypt5 PE=1 SV=1	1243	3	C	101.517	93.71	104.551	83.8548
sp|O74391|RL25B_SCHPO	rpl25b	60S ribosomal protein L25-B OS=Schizosaccharomyces pombe (strain 972 / ATCC 24843) GN=rpl25b PE=3 SV=1	1277	3	C	261.612	276.067	466.06	376.258
sp|Q9UUJ1|ARP2_SCHPO	arp2	Actin-related protein 2 OS=Schizosaccharomyces pombe (strain 972 / ATCC 24843) GN=arp2 PE=1 SV=1	172	3	C	91.9945	65.0215	73.3573	59.2491
sp|Q1MTN8|YGC1_SCHPO	SPBC16D10.01c	UPF0661 TPR repeat-containing protein C16D10.01c OS=Schizosaccharomyces pombe (strain 972 / ATCC 24843) GN=SPBC16D10.01c PE=3 SV=2	667	3	C	147.879	122.56	263.056	214.353
sp|Q9USM1|ADRM1_SCHPO	SPCC16A11.16c	Probable proteasomal ubiquitin receptor ADRM1 homolog OS=Schizosaccharomyces pombe (strain 972 / ATCC 24843) GN=SPCC16A11.16c PE=3 SV=1	1043	3	C	194.846	204.773	284.235	231.85
sp|G2TRQ9|TAM10_SCHPO	tam10	Uncharacterized protein tam10 OS=Schizosaccharomyces pombe (strain 972 / ATCC 24843) GN=tam10 PE=1 SV=1	1498	3	C	163.996	212.064	79.9937	65.6635
sp|O13640|YGWH_SCHPO	pi048	Uncharacterized alpha-1,2-galactosyltransferase C8D2.17 OS=Schizosaccharomyces pombe (strain 972 / ATCC 24843) GN=pi048 PE=3 SV=2	587	3	C	248.397	280.523	282.766	234.715
sp|O74496|COPD_SCHPO	ret2	Coatomer subunit delta OS=Schizosaccharomyces pombe (strain 972 / ATCC 24843) GN=ret2 PE=3 SV=1	962	3	C	146.109	90.7234	134.77	112.246
sp|P30821|P25_SCHPO	obr1	P25 protein OS=Schizosaccharomyces pombe (strain 972 / ATCC 24843) GN=obr1 PE=1 SV=1	588	3	C	114.001	116.459	105.702	89.0126
sp|P78954|IF4E1_SCHPO	tif451	Eukaryotic translation initiation factor 4E-1 OS=Schizosaccharomyces pombe (strain 972 / ATCC 24843) GN=tif451 PE=3 SV=1	1037	3	C	370.41	353.274	373.127	314.992
sp|O14290|YF14_SCHPO	SPAC9E9.04	Uncharacterized protein C9E9.04 OS=Schizosaccharomyces pombe (strain 972 / ATCC 24843) GN=SPAC9E9.04 PE=4 SV=1	521	3	C	122.707	107.527	169.687	143.383
sp|O13787|SEC62_SCHPO	sec62	Translocation protein sec62 OS=Schizosaccharomyces pombe (strain 972 / ATCC 24843) GN=sec62 PE=3 SV=1	564	3	C	248.886	168.771	193.901	165.066
sp|O60184|CYC8_SCHPO	ssn6	General transcriptional corepressor ssn6 OS=Schizosaccharomyces pombe (strain 972 / ATCC 24843) GN=ssn6 PE=1 SV=1	606	3	C	47.1755	26.5824	97.821	83.4688
sp|O43082|RR14C_SCHPO	rrp14c	Ribosomal RNA-processing protein 14-C OS=Schizosaccharomyces pombe (strain 972 / ATCC 24843) GN=rrp14c PE=1 SV=1	1619	3	C	123.837	105.638	139.85	120.78
sp|O59682|LCB1_SCHPO	lcb1	Serine palmitoyltransferase 1 OS=Schizosaccharomyces pombe (strain 972 / ATCC 24843) GN=lcb1 PE=3 SV=1	356	3	C	138.441	130.492	141.688	122.863
sp|O14087|RIM1_SCHPO	rim1	Single-stranded DNA-binding protein rim1, mitochondrial OS=Schizosaccharomyces pombe (strain 972 / ATCC 24843) GN=rim1 PE=2 SV=2	838	3	C	1040.94	438.535	107.829	93.5301
sp|P46595|UBC4_SCHPO	ubc4	Ubiquitin-conjugating enzyme E2 4 OS=Schizosaccharomyces pombe (strain 972 / ATCC 24843) GN=ubc4 PE=1 SV=1	806	3	C	271.284	187.07	352.086	306.066
sp|O13902|DAK1_SCHPO	dak1	Dihydroxyacetone kinase 1 OS=Schizosaccharomyces pombe (strain 972 / ATCC 24843) GN=dak1 PE=3 SV=1	603	3	C	106.494	105.382	103.555	91.209
sp|Q10344|TCTP_SCHPO	p23fy	Translationally-controlled tumor protein homolog OS=Schizosaccharomyces pombe (strain 972 / ATCC 24843) GN=p23fy PE=1 SV=1	850	3	C	200.815	214.671	165.611	147.052
sp|O74552|VPS35_SCHPO	vps35	Vacuolar protein sorting-associated protein 35 OS=Schizosaccharomyces pombe (strain 972 / ATCC 24843) GN=vps35 PE=1 SV=2	1205	3	C	386.893	349.406	359.252	320.808
sp|Q92373|RFA2_SCHPO	ssb2	Replication factor A protein 2 OS=Schizosaccharomyces pombe (strain 972 / ATCC 24843) GN=ssb2 PE=1 SV=1	1271	3	C	249.928	184.594	45.4112	40.6971
sp|Q9UTF7|ELOH1_SCHPO	SPAC1B2.03c	Putative elongation of fatty acids protein 1 OS=Schizosaccharomyces pombe (strain 972 / ATCC 24843) GN=SPAC1B2.03c PE=1 SV=1	107	3	C	189.564	257.136	249.908	224.023
sp|Q9HGL3|SUM2_SCHPO	sum2	Protein sum2 OS=Schizosaccharomyces pombe (strain 972 / ATCC 24843) GN=sum2 PE=1 SV=1	1526	3	C	139.727	158.681	144.795	130.404
sp|O60116|RBSK_SCHPO	SPBC16G5.02c	Putative ribokinase OS=Schizosaccharomyces pombe (strain 972 / ATCC 24843) GN=SPBC16G5.02c PE=3 SV=1	699	3	C	147.421	154.271	143.886	129.68
sp|Q9Y709|SKP1_SCHPO	skp1	Suppressor of kinetochore protein 1 OS=Schizosaccharomyces pombe (strain 972 / ATCC 24843) GN=skp1 PE=1 SV=1	1004	3	C	91.707	63.0066	90.6031	81.8672
sp|O74690|SNU13_SCHPO	snu13	13 kDa ribonucleoprotein-associated protein OS=Schizosaccharomyces pombe (strain 972 / ATCC 24843) GN=snu13 PE=3 SV=1	1534	3	C	353.324	389.211	424.104	383.242
sp|Q9P5N2|AAT1_SCHPO	aat1	Amino acid transporter 1 OS=Schizosaccharomyces pombe (strain 972 / ATCC 24843) GN=aat1 PE=3 SV=1	471	3	C	119.124	169.027	174.602	158.004
sp|Q9P6R3|YOH7_SCHPO	SPBC13E7.07	Uncharacterized protein C13E7.07 OS=Schizosaccharomyces pombe (strain 972 / ATCC 24843) GN=SPBC13E7.07 PE=4 SV=1	913	3	C	164.249	111.219	179.134	162.66
sp|Q09196|MLR4_SCHPO	cdc4	Myosin regulatory light chain cdc4 OS=Schizosaccharomyces pombe (strain 972 / ATCC 24843) GN=cdc4 PE=1 SV=1	1177	3	C	920.348	845.229	335.181	305
sp|Q9UT76|EI2BB_SCHPO	tif222	Probable translation initiation factor eIF-2B subunit beta OS=Schizosaccharomyces pombe (strain 972 / ATCC 24843) GN=tif222 PE=1 SV=1	584	3	C	180.605	157.28	171.718	156.429
sp|Q9USZ4|RPA34_SCHPO	rpa34	DNA-directed RNA polymerase I subunit rpa34 OS=Schizosaccharomyces pombe (strain 972 / ATCC 24843) GN=rpa34 PE=1 SV=1	958	3	C	135.657	56.4652	123.557	112.895
sp|O14086|RPA49_SCHPO	rpa49	DNA-directed RNA polymerase I subunit rpa49 OS=Schizosaccharomyces pombe (strain 972 / ATCC 24843) GN=rpa49 PE=2 SV=1	319	3	C	249.368	205.063	240.201	220.349
sp|P78920|YGNB_SCHPO	SPBC2D10.11c	Putative nucleosome assembly protein C2D10.11C OS=Schizosaccharomyces pombe (strain 972 / ATCC 24843) GN=SPBC2D10.11c PE=2 SV=2	1244	3	C	189.644	174.162	254.828	234.467
sp|O14003|RFC3_SCHPO	rfc3	Replication factor C subunit 3 OS=Schizosaccharomyces pombe (strain 972 / ATCC 24843) GN=rfc3 PE=1 SV=2	417	3	C	134.498	139.235	174.642	160.937
sp|Q9USP8|IDH2_SCHPO	idh2	Isocitrate dehydrogenase [NAD] subunit 2, mitochondrial OS=Schizosaccharomyces pombe (strain 972 / ATCC 24843) GN=idh2 PE=1 SV=2	4	3	C	140.666	122.057	165.729	152.88
sp|O94326|YGK8_SCHPO	SPBC725.08	Zinc finger protein C725.08 OS=Schizosaccharomyces pombe (strain 972 / ATCC 24843) GN=SPBC725.08 PE=1 SV=1	1384	3	C	183.483	184.288	199.741	184.799
sp|O14176|PRP40_SCHPO	prp40	Pre-mRNA-processing protein prp40 OS=Schizosaccharomyces pombe (strain 972 / ATCC 24843) GN=prp40 PE=1 SV=1	51	3	C	324.112	336.013	336.628	311.46
sp|Q10172|PAN1_SCHPO	pan1	Actin cytoskeleton-regulatory complex protein pan1 OS=Schizosaccharomyces pombe (strain 972 / ATCC 24843) GN=pan1 PE=1 SV=1	41	3	C	354.186	330.802	57.2185	52.9944
sp|Q92399|RPAB3_SCHPO	rpb8	DNA-directed RNA polymerases I, II, and III subunit RPABC3 OS=Schizosaccharomyces pombe (strain 972 / ATCC 24843) GN=rpb8 PE=1 SV=2	875	3	C	209.836	202.902	252.188	234.127
sp|O42991|RL16B_SCHPO	rpl16b	60S ribosomal protein L16-B OS=Schizosaccharomyces pombe (strain 972 / ATCC 24843) GN=rpl16b PE=1 SV=1	895	3	C	273.647	164.311	308.518	286.604
sp|Q09892|HOG1_SCHPO	sty1	Mitogen-activated protein kinase sty1 OS=Schizosaccharomyces pombe (strain 972 / ATCC 24843) GN=sty1 PE=1 SV=1	1329	3	C	117.398	90.26	122.776	114.158
sp|Q9P7S4|TAF4_SCHPO	taf4	Transcription initiation factor TFIID subunit 4 OS=Schizosaccharomyces pombe (strain 972 / ATCC 24843) GN=taf4 PE=3 SV=1	698	3	C	112.176	119.996	126.993	118.754
sp|Q9UTQ7|ARP9_SCHPO	arp9	SWI/SNF and RSC complexes subunit arp9 OS=Schizosaccharomyces pombe (strain 972 / ATCC 24843) GN=arp9 PE=1 SV=1	908	3	C	152.496	191.31	188.778	177.234
sp|Q09173|PP2C3_SCHPO	ptc3	Protein phosphatase 2C homolog 3 OS=Schizosaccharomyces pombe (strain 972 / ATCC 24843) GN=ptc3 PE=3 SV=1	307	3	C	233.261	194.238	154.735	145.642
sp|O43011|SYH_SCHPO	hts1	Histidine--tRNA ligase, mitochondrial OS=Schizosaccharomyces pombe (strain 972 / ATCC 24843) GN=hts1 PE=1 SV=2	833	3	C	206.039	259.742	201.537	190.042
sp|Q09852|YAEC_SCHPO	SPAC23D3.12	Putative inorganic phosphate transporter C23D3.12 OS=Schizosaccharomyces pombe (strain 972 / ATCC 24843) GN=SPAC23D3.12 PE=1 SV=1	778	3	C	362.71	366.009	319.939	301.724
sp|Q09803|VPS4_SCHPO	vps4	Suppressor protein of bem1/bed5 double mutants OS=Schizosaccharomyces pombe (strain 972 / ATCC 24843) GN=vps4 PE=3 SV=1	1052	3	C	154.942	159.721	215.697	204.439
sp|P29458|MCM4_SCHPO	mcm4	DNA replication licensing factor mcm4 OS=Schizosaccharomyces pombe (strain 972 / ATCC 24843) GN=mcm4 PE=1 SV=2	867	3	C	215.773	214.34	220.479	209.53
sp|O13704|YEU5_SCHPO	SPAC13F5.05	Thioredoxin domain-containing protein C13F5.05, mitochondrial OS=Schizosaccharomyces pombe (strain 972 / ATCC 24843) GN=SPAC13F5.05 PE=3 SV=2	809	3	C	190.045	166.869	206.922	197.532
sp|Q9P382|NUP82_SCHPO	nup82	Nucleoporin nup82 OS=Schizosaccharomyces pombe (strain 972 / ATCC 24843) GN=nup82 PE=3 SV=1	1355	3	C	129.302	180.974	180.155	172.333
sp|Q9UU91|YOP1_SCHPO	yop1	Protein yop1 OS=Schizosaccharomyces pombe (strain 972 / ATCC 24843) GN=yop1 PE=1 SV=1	1373	3	C	111.944	175.74	169.223	162.028
sp|O42993|FKBP_SCHPO	fkh1	Peptidyl-prolyl cis-trans isomerase OS=Schizosaccharomyces pombe (strain 972 / ATCC 24843) GN=fkh1 PE=3 SV=1	1084	3	C	239.88	258.333	159.538	153.021
sp|Q9Y7R7|RL1DA_SCHPO	SPCC306.07c	Putative ribosome biogenesis protein C306.07c OS=Schizosaccharomyces pombe (strain 972 / ATCC 24843) GN=SPCC306.07c PE=3 SV=1	374	3	C	481.567	492.459	473.827	455.743
sp|O42932|QCR6_SCHPO	qcr6	Cytochrome b-c1 complex subunit 6 OS=Schizosaccharomyces pombe (strain 972 / ATCC 24843) GN=qcr6 PE=3 SV=1	1543	3	C	133.467	179.636	85.2209	82.0206
sp|O94675|MAM33_SCHPO	SPBC776.07	Mitochondrial acidic protein mam33 OS=Schizosaccharomyces pombe (strain 972 / ATCC 24843) GN=SPBC776.07 PE=3 SV=1	980	3	C	308.701	234.571	279.524	269.249
sp|O43036|RPA43_SCHPO	rpa43	DNA-directed RNA polymerase I subunit rpa43 OS=Schizosaccharomyces pombe (strain 972 / ATCC 24843) GN=rpa43 PE=1 SV=1	738	3	C	150.941	153.486	220.184	212.609
sp|O59811|REI1_SCHPO	SPCC550.15c	Cytoplasmic 60S subunit biogenesis factor SPCC550.15c OS=Schizosaccharomyces pombe (strain 972 / ATCC 24843) GN=SPCC550.15c PE=1 SV=1	1067	3	C	64.7865	117.649	180.986	175.454
sp|O59704|ELP1_SCHPO	iki3	Elongator complex protein 1 OS=Schizosaccharomyces pombe (strain 972 / ATCC 24843) GN=iki3 PE=3 SV=1	951	3	C	178.378	210.065	203.115	197.617
sp|Q9P785|YNY5_SCHPO	SPBC1711.05	LisH domain-containing protein C1711.05 OS=Schizosaccharomyces pombe (strain 972 / ATCC 24843) GN=SPBC1711.05 PE=3 SV=1	780	3	C	690.154	487.395	290.563	283.04
sp|O13783|BRO1_SCHPO	bro1	Vacuolar protein-sorting protein bro1 OS=Schizosaccharomyces pombe (strain 972 / ATCC 24843) GN=bro1 PE=3 SV=1	331	3	C	332.302	332.218	252.195	247.793
sp|O74454|STS5_SCHPO	sts5	Protein sts5 OS=Schizosaccharomyces pombe (strain 972 / ATCC 24843) GN=sts5 PE=1 SV=1	879	3	C	88.381	119.956	137.777	135.375
sp|Q9Y7Y8|SYQ_SCHPO	qrs1	Probable glutamine--tRNA ligase OS=Schizosaccharomyces pombe (strain 972 / ATCC 24843) GN=qrs1 PE=3 SV=1	959	3	C	48.1243	53.9649	83.8609	83.2383
sp|O74469|YQC7_SCHPO	SPCC1739.07	Exosome complex protein C1739.07 OS=Schizosaccharomyces pombe (strain 972 / ATCC 24843) GN=SPCC1739.07 PE=1 SV=1	617	3	C	141.739	159.158	286.619	284.694
sp|Q09826|SDS23_SCHPO	sds23	Protein sds23/moc1 OS=Schizosaccharomyces pombe (strain 972 / ATCC 24843) GN=sds23 PE=1 SV=1	203	3	C	134.307	139.283	153.876	153.633
sp|Q9USV4|MEP33_SCHPO	mep33	mRNA export protein 33 OS=Schizosaccharomyces pombe (strain 972 / ATCC 24843) GN=mep33 PE=2 SV=1	7	3	C	169.403	147.922	159.805	160.35
sp|O74504|YJD1_SCHPO	SPCC594.01	UPF0590 protein C594.01 OS=Schizosaccharomyces pombe (strain 972 / ATCC 24843) GN=SPCC594.01 PE=1 SV=2	1562	3	C	130.498	130.527	130.671	131.225
sp|Q9USI6|MYO2_SCHPO	myo2	Myosin type-2 heavy chain 1 OS=Schizosaccharomyces pombe (strain 972 / ATCC 24843) GN=myo2 PE=1 SV=1	1464	3	C	176.054	134.718	87.7392	88.5062
sp|Q9HGM5|DBP8_SCHPO	dbp8	ATP-dependent RNA helicase dbp8 OS=Schizosaccharomyces pombe (strain 972 / ATCC 24843) GN=dbp8 PE=3 SV=1	785	3	C	329.244	353.694	296.483	299.733
sp|O94563|YGD4_SCHPO	SPBC1773.04	Putative uncharacterized oxidoreductase C1773.04 OS=Schizosaccharomyces pombe (strain 972 / ATCC 24843) GN=SPBC1773.04 PE=1 SV=1	632	3	C	147.793	154.958	117.959	119.318
sp|O94289|LUB1_SCHPO	lub1	Ubiquitin homeostasis protein lub1 OS=Schizosaccharomyces pombe (strain 972 / ATCC 24843) GN=lub1 PE=1 SV=2	1224	3	C	106.785	119.409	149.531	151.34
sp|O14089|IMB2_SCHPO	kap104	Importin subunit beta-2 OS=Schizosaccharomyces pombe (strain 972 / ATCC 24843) GN=kap104 PE=3 SV=1	529	3	C	264.812	230.947	268.131	271.636
sp|O42870|SYFA_SCHPO	frs2	Phenylalanine--tRNA ligase alpha subunit OS=Schizosaccharomyces pombe (strain 972 / ATCC 24843) GN=frs2 PE=3 SV=3	629	3	C	143.696	114.229	106.168	107.583
sp|P41391|RNA1_SCHPO	rna1	Ran GTPase-activating protein 1 OS=Schizosaccharomyces pombe (strain 972 / ATCC 24843) GN=rna1 PE=1 SV=1	389	3	C	35.4325	79.9067	124.791	126.458
sp|Q9UTK4|NU189_SCHPO	nup189	Nucleoporin nup189 OS=Schizosaccharomyces pombe (strain 972 / ATCC 24843) GN=nup189 PE=1 SV=1	799	3	C	184.553	87.7095	151.97	154.452
sp|O94407|SEC65_SCHPO	sec65	Signal recognition particle sec65 subunit OS=Schizosaccharomyces pombe (strain 972 / ATCC 24843) GN=sec65 PE=3 SV=2	318	3	C	157.007	160.058	181.103	184.224
sp|Q10055|FAL1_SCHPO	tif412	ATP-dependent RNA helicase fal1 OS=Schizosaccharomyces pombe (strain 972 / ATCC 24843) GN=tif412 PE=1 SV=1	321	3	C	90.4114	59.1916	114.284	116.371
sp|P78871|RST2_SCHPO	rst2	Zinc finger protein rst2 OS=Schizosaccharomyces pombe (strain 972 / ATCC 24843) GN=rst2 PE=2 SV=2	1418	3	C	135.729	195.371	87.0999	89.2898
sp|O74989|YJZC_SCHPO	SPCC338.12	Uncharacterized protein C338.12 OS=Schizosaccharomyces pombe (strain 972 / ATCC 24843) GN=SPCC338.12 PE=3 SV=1	822	3	C	201.566	317.818	132.169	135.641
sp|P11620|YPT1_SCHPO	ypt1	GTP-binding protein ypt1 OS=Schizosaccharomyces pombe (strain 972 / ATCC 24843) GN=ypt1 PE=1 SV=2	1070	3	C	241.812	209.452	243.155	250.378
sp|Q76PD3|DBP6_SCHPO	dbp6	ATP-dependent RNA helicase dbp6 OS=Schizosaccharomyces pombe (strain 972 / ATCC 24843) GN=dbp6 PE=2 SV=1	1186	3	C	285.643	325.077	248.502	255.887
sp|Q10659|SPO14_SCHPO	spo14	Membrane glycoprotein spo14 OS=Schizosaccharomyces pombe (strain 972 / ATCC 24843) GN=spo14 PE=2 SV=1	1245	3	C	90.5067	84.5665	138.588	143
sp|Q10452|GSK3_SCHPO	gsk3	Protein kinase gsk3 OS=Schizosaccharomyces pombe (strain 972 / ATCC 24843) GN=gsk3 PE=1 SV=3	1385	3	C	113.004	115.268	131.807	136.542
sp|Q9HGN7|SEC63_SCHPO	sec63	Translocation protein sec63 OS=Schizosaccharomyces pombe (strain 972 / ATCC 24843) GN=sec63 PE=1 SV=1	1237	3	C	162.417	166.418	213.917	222.69
sp|Q11004|PPID_SCHPO	wis2	40 kDa peptidyl-prolyl cis-trans isomerase OS=Schizosaccharomyces pombe (strain 972 / ATCC 24843) GN=wis2 PE=2 SV=1	254	3	C	373.818	333.835	316.193	330.685
sp|Q9UT87|IMG1_SCHPO	img1	54S ribosomal protein subunit img1, mitochondrial OS=Schizosaccharomyces pombe (strain 972 / ATCC 24843) GN=img1 PE=3 SV=1	854	3	C	152.227	165.131	293.393	307.22
sp|P79057|RS23_SCHPO	rps23a	40S ribosomal protein S23 OS=Schizosaccharomyces pombe (strain 972 / ATCC 24843) GN=rps23a PE=1 SV=2	1536	3	C	205.056	165.33	203.238	213.075
sp|O14273|YET4_SCHPO	SPAC8C9.04	Meiotically up-regulated protein C8C9.04 OS=Schizosaccharomyces pombe (strain 972 / ATCC 24843) GN=SPAC8C9.04 PE=1 SV=1	565	3	C	80.2214	55.1797	80.3401	84.3332
sp|Q92371|NACB_SCHPO	btf3	Nascent polypeptide-associated complex subunit beta OS=Schizosaccharomyces pombe (strain 972 / ATCC 24843) GN=btf3 PE=2 SV=2	1153	3	C	183.296	165.021	258.132	270.975
sp|O74503|UAF30_SCHPO	spp27	Upstream activation factor subunit spp27 OS=Schizosaccharomyces pombe (strain 972 / ATCC 24843) GN=spp27 PE=1 SV=1	751	3	C	273.859	272.114	250.39	264.236
sp|O14180|YDS4_SCHPO	SPAC4F8.04	Brix domain-containing protein C4F8.04 OS=Schizosaccharomyces pombe (strain 972 / ATCC 24843) GN=SPAC4F8.04 PE=3 SV=1	645	3	C	131.98	95.906	190.696	201.244
sp|O60161|UTP4_SCHPO	utp4	U3 small nucleolar RNA-associated protein 4 OS=Schizosaccharomyces pombe (strain 972 / ATCC 24843) GN=utp4 PE=3 SV=1	507	3	C	236.209	274.074	188.454	199.057
sp|Q9UT09|AROG_SCHPO	aro4	Phospho-2-dehydro-3-deoxyheptonate aldolase, tyrosine-inhibited OS=Schizosaccharomyces pombe (strain 972 / ATCC 24843) GN=aro4 PE=3 SV=1	978	3	C	267.156	261.486	225.303	238.623
sp|Q10270|MET16_SCHPO	met16	Probable phosphoadenosine phosphosulfate reductase OS=Schizosaccharomyces pombe (strain 972 / ATCC 24843) GN=met16 PE=3 SV=1	1077	3	C	117.013	154.826	137.652	146.532
sp|O43005|AP2B_SCHPO	apl1	AP-2 complex subunit beta OS=Schizosaccharomyces pombe (strain 972 / ATCC 24843) GN=apl1 PE=3 SV=1	1372	3	C	1184.1	683.964	151.139	161.064
sp|O74472|MUG33_SCHPO	mug33	Meiotically up-regulated gene 33 protein OS=Schizosaccharomyces pombe (strain 972 / ATCC 24843) GN=mug33 PE=1 SV=1	563	3	C	1266.73	966.093	244.497	260.631
sp|P57728|RL28B_SCHPO	rpl28b	60S ribosomal protein L28-B OS=Schizosaccharomyces pombe (strain 972 / ATCC 24843) GN=rpl28b PE=1 SV=1	240	3	C	66.6741	77.3747	150.457	161.874
sp|O94265|THI21_SCHPO	SPBP8B7.17c	Putative hydroxymethylpyrimidine/phosphomethylpyrimidine kinase 1 OS=Schizosaccharomyces pombe (strain 972 / ATCC 24843) GN=SPBP8B7.17c PE=3 SV=1	929	3	C	268.863	259.065	236.973	255.037
sp|P37202|DIS3_SCHPO	dis3	Exosome complex exonuclease dis3 OS=Schizosaccharomyces pombe (strain 972 / ATCC 24843) GN=dis3 PE=1 SV=1	883	3	C	121.393	108.81	130.177	140.149
sp|Q9UUC6|SMD3_SCHPO	smd3	Small nuclear ribonucleoprotein Sm D3 OS=Schizosaccharomyces pombe (strain 972 / ATCC 24843) GN=smd3 PE=1 SV=1	722	3	C	174.956	147.766	181.259	195.148
sp|Q9Y7X8|ARP5_SCHPO	arp5	Actin-like protein arp5 OS=Schizosaccharomyces pombe (strain 972 / ATCC 24843) GN=arp5 PE=1 SV=1	295	3	C	172.238	205.654	209.426	225.673
sp|P87178|YB1D_SCHPO	SPBC3D6.13c	Uncharacterized protein C3D6.13c OS=Schizosaccharomyces pombe (strain 972 / ATCC 24843) GN=SPBC3D6.13c PE=1 SV=1	1263	3	C	286.361	123.636	262.655	283.899
sp|Q7Z9I2|YCP9_SCHPO	SPCC663.09c	Uncharacterized oxidoreductase C663.09c OS=Schizosaccharomyces pombe (strain 972 / ATCC 24843) GN=SPCC663.09c PE=3 SV=1	223	3	C	71.4106	72.1769	74.626	81.0644
sp|O94401|YQF8_SCHPO	SPCC126.08c	L-type lectin-like domain-containing protein C126.08c OS=Schizosaccharomyces pombe (strain 972 / ATCC 24843) GN=SPCC126.08c PE=3 SV=1	346	3	C	92.5986	69.2324	160.936	175.075
sp|Q9USR7|RL38A_SCHPO	rpl38a	60S ribosomal protein L38-1 OS=Schizosaccharomyces pombe (strain 972 / ATCC 24843) GN=rpl38a PE=3 SV=1	1407	3	C	72.863	71.9706	202.123	220.413
sp|O59804|CH10_SCHPO	hsp10	10 kDa heat shock protein, mitochondrial OS=Schizosaccharomyces pombe (strain 972 / ATCC 24843) GN=hsp10 PE=1 SV=1	1378	3	C	95.0947	77.8407	65.0782	71.1703
sp|Q9P6N8|RRP3_SCHPO	rrp3	ATP-dependent rRNA helicase rrp3 OS=Schizosaccharomyces pombe (strain 972 / ATCC 24843) GN=rrp3 PE=3 SV=1	848	3	C	213.011	199.783	238.106	260.834
sp|O60096|RT35_SCHPO	bot1	37S ribosomal protein S35, mitochondrial OS=Schizosaccharomyces pombe (strain 972 / ATCC 24843) GN=bot1 PE=2 SV=1	1424	3	C	142.186	85.3182	106.576	116.793
sp|O14206|YDD3_SCHPO	SPAC1B9.03c	Brix domain-containing protein C1B9.03c OS=Schizosaccharomyces pombe (strain 972 / ATCC 24843) GN=SPAC1B9.03c PE=1 SV=2	108	3	C	202.873	206.79	136.367	149.901
sp|O74349|LTN1_SCHPO	rkr1	E3 ubiquitin-protein ligase listerin OS=Schizosaccharomyces pombe (strain 972 / ATCC 24843) GN=rkr1 PE=3 SV=1	592	3	C	94.0341	48.4626	101.304	111.622
sp|O13845|RSD1_SCHPO	rsd1	RNA-binding protein rsd1 OS=Schizosaccharomyces pombe (strain 972 / ATCC 24843) GN=rsd1 PE=1 SV=2	304	3	C	498.195	447.707	232.508	261.142
sp|P78813|YCTB_SCHPO	SPCC794.11c	ENTH domain-containing protein C794.11c OS=Schizosaccharomyces pombe (strain 972 / ATCC 24843) GN=SPCC794.11c PE=1 SV=2	798	3	C	192.17	243.349	136.471	154.081
sp|Q09820|RENT1_SCHPO	upf1	ATP-dependent helicase upf1 OS=Schizosaccharomyces pombe (strain 972 / ATCC 24843) GN=upf1 PE=3 SV=2	1122	3	C	69.2229	102.564	85.5517	96.7139
sp|O94307|PFD5_SCHPO	bob1	Probable prefoldin subunit 5 OS=Schizosaccharomyces pombe (strain 972 / ATCC 24843) GN=bob1 PE=1 SV=1	573	3	C	124.275	198.129	92.9746	105.594
sp|Q96WW6|ALG2_SCHPO	alg2	Alpha-1,3/1,6-mannosyltransferase alg2 OS=Schizosaccharomyces pombe (strain 972 / ATCC 24843) GN=alg2 PE=3 SV=2	624	3	C	141.91	162.439	193.217	219.69
sp|Q9USM6|CYB52_SCHPO	oca8	Probable cytochrome b5 2 OS=Schizosaccharomyces pombe (strain 972 / ATCC 24843) GN=oca8 PE=3 SV=1	630	3	C	105.2	85.1699	101.455	115.504
sp|Q9HDX7|YK1D_SCHPO	SPAPB1A10.13	Uncharacterized protein PB1A10.13 OS=Schizosaccharomyces pombe (strain 972 / ATCC 24843) GN=SPAPB1A10.13 PE=1 SV=1	1036	3	C	168.333	172.878	102.808	117.431
sp|Q9UT11|YLW3_SCHPO	SPAP8A3.03	Uncharacterized zinc transporter P8A3.03 OS=Schizosaccharomyces pombe (strain 972 / ATCC 24843) GN=SPAP8A3.03 PE=3 SV=1	1250	3	C	131.506	201.819	151.301	173.116
sp|Q9USZ1|EFGM_SCHPO	mef1	Elongation factor G, mitochondrial OS=Schizosaccharomyces pombe (strain 972 / ATCC 24843) GN=mef1 PE=3 SV=2	996	3	C	128.478	131.345	98.9376	113.535
sp|O59865|RS24B_SCHPO	rps24b	40S ribosomal protein S24-B OS=Schizosaccharomyces pombe (strain 972 / ATCC 24843) GN=rps24b PE=2 SV=3	1548	3	C	213.908	201.292	340.856	391.713
sp|Q9UTP0|RL30B_SCHPO	rpl30b	60S ribosomal protein L30-2 OS=Schizosaccharomyces pombe (strain 972 / ATCC 24843) GN=rpl30b PE=3 SV=1	1427	3	C	120.659	164.302	244.483	281.318
sp|P40373|HIS1_SCHPO	his1	ATP phosphoribosyltransferase OS=Schizosaccharomyces pombe (strain 972 / ATCC 24843) GN=his1 PE=2 SV=1	475	3	C	191.3	182.164	135.228	156.093
sp|O94466|RGA7_SCHPO	rga7	Probable Rho-GTPase-activating protein 7 OS=Schizosaccharomyces pombe (strain 972 / ATCC 24843) GN=rga7 PE=1 SV=1	323	3	C	136.069	148.728	122.141	141.041
sp|O14248|TEA3_SCHPO	tea3	Tip elongation aberrant protein 3 OS=Schizosaccharomyces pombe (strain 972 / ATCC 24843) GN=tea3 PE=1 SV=1	613	3	C	216.471	170.85	112.907	130.894
sp|Q9HFE6|YNW6_SCHPO	SPBP16F5.06	Uncharacterized RNA-binding protein P16F5.06 OS=Schizosaccharomyces pombe (strain 972 / ATCC 24843) GN=SPBP16F5.06 PE=1 SV=1	950	3	C	211.618	215.471	157.267	182.561
sp|O42933|PMT4_SCHPO	ogm4	Dolichyl-phosphate-mannose--protein mannosyltransferase 4 OS=Schizosaccharomyces pombe (strain 972 / ATCC 24843) GN=ogm4 PE=3 SV=1	1013	3	C	179.454	104.843	209.204	242.935
sp|O59702|CLR6_SCHPO	clr6	Histone deacetylase clr6 OS=Schizosaccharomyces pombe (strain 972 / ATCC 24843) GN=clr6 PE=1 SV=1	1557	3	C	266.336	378.3	215.386	251.624
sp|O13622|MS116_SCHPO	mss116	ATP-dependent RNA helicase mss116, mitochondrial OS=Schizosaccharomyces pombe (strain 972 / ATCC 24843) GN=mss116 PE=3 SV=1	549	3	C	141.89	137.367	295.461	345.937
sp|O94620|CWF17_SCHPO	cwf17	Pre-mRNA-splicing factor cwf17 OS=Schizosaccharomyces pombe (strain 972 / ATCC 24843) GN=cwf17 PE=1 SV=1	711	3	C	130.601	128.981	117.409	138.488
sp|O74862|UTP23_SCHPO	utp23	rRNA-processing protein utp23 OS=Schizosaccharomyces pombe (strain 972 / ATCC 24843) GN=utp23 PE=3 SV=1	1015	3	C	235.117	336.35	178.652	210.906
sp|O60169|YHC5_SCHPO	SPBC19F8.05	Uncharacterized protein C19F8.05 OS=Schizosaccharomyces pombe (strain 972 / ATCC 24843) GN=SPBC19F8.05 PE=4 SV=1	864	3	C	80.5958	77.7535	113.258	134.789
sp|Q9P7S3|SSR3_SCHPO	ssr3	SWI/SNF and RSC complexes subunit ssr3 OS=Schizosaccharomyces pombe (strain 972 / ATCC 24843) GN=ssr3 PE=1 SV=1	176	3	C	169.802	225.943	196.626	235.305
sp|Q11120|OFD1_SCHPO	ofd1	Prolyl 3,4-dihydroxylase ofd1 OS=Schizosaccharomyces pombe (strain 972 / ATCC 24843) GN=ofd1 PE=1 SV=1	626	3	C	58.7867	130.273	146.326	177.495
sp|O94615|PPR8_SCHPO	ppr8	Pentatricopeptide repeat-containing protein 8, mitochondrial OS=Schizosaccharomyces pombe (strain 972 / ATCC 24843) GN=ppr8 PE=4 SV=1	537	3	C	170.271	283.462	235.688	285.949
sp|Q9USH8|GLU2B_SCHPO	gtb1	Glucosidase 2 subunit beta OS=Schizosaccharomyces pombe (strain 972 / ATCC 24843) GN=gtb1 PE=1 SV=1	730	3	C	142.987	176.532	150.025	182.336
sp|Q10170|RMT2_SCHPO	rmt2	Protein arginine N-methyltransferase 2 OS=Schizosaccharomyces pombe (strain 972 / ATCC 24843) GN=rmt2 PE=3 SV=2	1011	3	C	162.553	294.95	291.969	355.38
sp|O94383|SMC1_SCHPO	psm1	Structural maintenance of chromosomes protein 1 OS=Schizosaccharomyces pombe (strain 972 / ATCC 24843) GN=psm1 PE=1 SV=2	884	3	C	121.251	136.9	176.938	215.816
sp|O94255|CAN_SCHPO	SPBP8B7.05c	Carbonic anhydrase OS=Schizosaccharomyces pombe (strain 972 / ATCC 24843) GN=SPBP8B7.05c PE=1 SV=2	845	3	C	62.9685	122.919	124.617	152.074
sp|Q09801|FIP1X_SCHPO	SPAC22G7.10	Pre-mRNA polyadenylation factor fip1 OS=Schizosaccharomyces pombe (strain 972 / ATCC 24843) GN=SPAC22G7.10 PE=3 SV=1	646	3	C	485.784	801.257	266.789	328.769
sp|O14205|VPS74_SCHPO	vps74	Vacuolar protein sorting-associated protein 74 OS=Schizosaccharomyces pombe (strain 972 / ATCC 24843) GN=vps74 PE=1 SV=2	739	3	C	96.6637	115.835	77.3566	95.5927
sp|Q9USW1|YHZ3_SCHPO	SPBC21B10.03c	Uncharacterized protein C21B10.03c OS=Schizosaccharomyces pombe (strain 972 / ATCC 24843) GN=SPBC21B10.03c PE=4 SV=1	539	3	C	357.936	517.724	152.077	188.075
sp|O94602|YC8F_SCHPO	SPCC622.15c	Uncharacterized protein C622.15c OS=Schizosaccharomyces pombe (strain 972 / ATCC 24843) GN=SPCC622.15c PE=4 SV=1	324	3	C	169.415	145.156	138.272	172.467
sp|P36594|RPB1_SCHPO	rpb1	DNA-directed RNA polymerase II subunit rpb1 OS=Schizosaccharomyces pombe (strain 972 / ATCC 24843) GN=rpb1 PE=1 SV=1	482	3	C	114.677	210.444	367.413	459.168
sp|O59681|YBS1_SCHPO	SPBC18E5.01	Uncharacterized protein C18E5.01 OS=Schizosaccharomyces pombe (strain 972 / ATCC 24843) GN=SPBC18E5.01 PE=3 SV=1	1126	3	C	126.482	247.656	124.475	155.892
sp|O60105|PUR8_SCHPO	ade8	Adenylosuccinate lyase OS=Schizosaccharomyces pombe (strain 972 / ATCC 24843) GN=ade8 PE=3 SV=1	460	3	C	173.122	152.365	131.277	165.125
sp|Q10329|PSA4_SCHPO	pre6	Probable proteasome subunit alpha type-4 OS=Schizosaccharomyces pombe (strain 972 / ATCC 24843) GN=pre6 PE=3 SV=1	399	3	C	138.316	137.954	102.4	128.897
sp|Q9P777|HISX_SCHPO	his2	Histidinol dehydrogenase OS=Schizosaccharomyces pombe (strain 972 / ATCC 24843) GN=his2 PE=3 SV=1	5	3	C	139.426	102.36	139.34	176.816
sp|P05764|RS21_SCHPO	rps21	40S ribosomal protein S21 OS=Schizosaccharomyces pombe (strain 972 / ATCC 24843) GN=rps21 PE=1 SV=2	1476	3	C	110.418	104.084	166.975	212.137
sp|Q9UQW6|THIL_SCHPO	erg10	Acetyl-CoA acetyltransferase OS=Schizosaccharomyces pombe (strain 972 / ATCC 24843) GN=erg10 PE=2 SV=1	182	3	C	180.731	178.353	164.882	212.94
sp|P87127|ATP11_SCHPO	atp11	Protein atp11, mitochondrial OS=Schizosaccharomyces pombe (strain 972 / ATCC 24843) GN=atp11 PE=3 SV=1	1458	3	C	190.885	192.478	154.426	202.12
sp|O94442|NBP35_SCHPO	nbp35	Cytosolic Fe-S cluster assembly factor nbp35 OS=Schizosaccharomyces pombe (strain 972 / ATCC 24843) GN=nbp35 PE=3 SV=1	1170	3	C	143.479	202.232	168.364	226.474
sp|Q9UT25|YFY2_SCHPO	SPAC9.02c	Uncharacterized N-acetyltransferase C9.02c OS=Schizosaccharomyces pombe (strain 972 / ATCC 24843) GN=SPAC9.02c PE=3 SV=1	1425	3	C	47.1099	78.4766	121.073	171.962
sp|Q9HFE4|FMO1_SCHPO	fmo1	Thiol-specific monooxygenase OS=Schizosaccharomyces pombe (strain 972 / ATCC 24843) GN=fmo1 PE=1 SV=1	634	3	C	140.657	181.663	76.5244	108.749
sp|Q9P7Y7|P5CR_SCHPO	pro3	Pyrroline-5-carboxylate reductase OS=Schizosaccharomyces pombe (strain 972 / ATCC 24843) GN=pro3 PE=3 SV=1	1072	3	C	94.7434	197.299	88.8577	170.968
sp|O14327|PAB2_SCHPO	pab2	Polyadenylate-binding protein 2 OS=Schizosaccharomyces pombe (strain 972 / ATCC 24843) GN=pab2 PE=1 SV=1	425	3	C	508.904	2124.56	273.63	540.443
sp|Q09717|RANG_SCHPO	sbp1	Ran-specific GTPase-activating protein 1 OS=Schizosaccharomyces pombe (strain 972 / ATCC 24843) GN=sbp1 PE=1 SV=1	580	3	C	97.1425	139.654	172.58	450.898
sp|Q9UTI8|RL44_SCHPO	rpl42	60S ribosomal protein L42 OS=Schizosaccharomyces pombe (strain 972 / ATCC 24843) GN=rpl42 PE=1 SV=3	1251	2	C	442.84	217.518	536.955	324.17
sp|Q9UR17|VTC1_SCHPO	nrf1	Vacuolar transporter chaperone 1 OS=Schizosaccharomyces pombe (strain 972 / ATCC 24843) GN=nrf1 PE=2 SV=1	1558	2	C	226.208	198.117	201.187	131.23
sp|Q9P7H0|NHP2_SCHPO	nhp2	H/ACA ribonucleoprotein complex subunit 2 OS=Schizosaccharomyces pombe (strain 972 / ATCC 24843) GN=nhp2 PE=1 SV=1	988	2	C	352.66	224.699	169.991	111.131
sp|Q9UST4|IF5A2_SCHPO	tif51b	Eukaryotic translation initiation factor 5A-2 OS=Schizosaccharomyces pombe (strain 972 / ATCC 24843) GN=tif51b PE=3 SV=2	655	2	C	152.31	107.007	131.191	85.7752
sp|Q9UUC2|YGR1_SCHPO	SPBC365.01	CRAL-TRIO domain-containing protein C365.01 OS=Schizosaccharomyces pombe (strain 972 / ATCC 24843) GN=SPBC365.01 PE=2 SV=1	469	2	C	146.366	152.77	201.057	132.837
sp|O14096|TGTL_SCHPO	SPAC2F3.13c	Queuine tRNA-ribosyltransferase-like protein OS=Schizosaccharomyces pombe (strain 972 / ATCC 24843) GN=SPAC2F3.13c PE=3 SV=4	512	2	C	136.38	108.821	55.7534	38.8169
sp|P40232|CSK2B_SCHPO	ckb1	Casein kinase II subunit beta OS=Schizosaccharomyces pombe (strain 972 / ATCC 24843) GN=ckb1 PE=2 SV=2	1254	2	C	568.91	240.011	127.728	92.0136
sp|O13989|YEG7_SCHPO	SPAC26H5.07c	Uncharacterized protein C26H5.07c OS=Schizosaccharomyces pombe (strain 972 / ATCC 24843) GN=SPAC26H5.07c PE=3 SV=2	1275	2	C	124.083	141.254	93.6105	68.1659
sp|O94300|YOOH_SCHPO	SPBC887.17	Putative xanthine/uracil permease C887.17 OS=Schizosaccharomyces pombe (strain 972 / ATCC 24843) GN=SPBC887.17 PE=3 SV=1	1341	2	C	186.907	164.618	181.626	132.714
sp|O13739|CHMU_SCHPO	SPAC16E8.04c	Probable chorismate mutase OS=Schizosaccharomyces pombe (strain 972 / ATCC 24843) GN=SPAC16E8.04c PE=3 SV=1	1371	2	C	49.2926	42.7756	89.4598	67.1655
sp|O14307|TRM61_SCHPO	cpd1	tRNA (adenine(58)-N(1))-methyltransferase catalytic subunit trm61 OS=Schizosaccharomyces pombe (strain 972 / ATCC 24843) GN=cpd1 PE=3 SV=1	940	2	C	206.93	194.941	194.243	147.184
sp|P78789|YC63_SCHPO	SPCC1919.03c	Uncharacterized protein C1919.03c OS=Schizosaccharomyces pombe (strain 972 / ATCC 24843) GN=SPCC1919.03c PE=1 SV=2	1572	2	C	114.403	88.5036	129.85	99.211
sp|O60071|YBB9_SCHPO	SPBC13G1.09	Uncharacterized protein C13G1.09 OS=Schizosaccharomyces pombe (strain 972 / ATCC 24843) GN=SPBC13G1.09 PE=1 SV=1	1117	2	C	29.0822	76.6642	87.7242	67.155
sp|O75001|MCM7_SCHPO	mcm7	DNA replication licensing factor mcm7 OS=Schizosaccharomyces pombe (strain 972 / ATCC 24843) GN=mcm7 PE=1 SV=1	1344	2	C	94.4741	126.816	155.473	119.539
sp|P07799|TOP1_SCHPO	top1	DNA topoisomerase 1 OS=Schizosaccharomyces pombe (strain 972 / ATCC 24843) GN=top1 PE=1 SV=2	919	2	C	100.095	52.3004	96.227	74.0898
sp|O13774|GCH1_SCHPO	SPAC17A5.13	GTP cyclohydrolase 1 OS=Schizosaccharomyces pombe (strain 972 / ATCC 24843) GN=SPAC17A5.13 PE=1 SV=1	1298	2	C	195.354	202.858	195.528	151.68
sp|Q9Y876|SHR3_SCHPO	psh3	Secretory component protein psh3 OS=Schizosaccharomyces pombe (strain 972 / ATCC 24843) GN=psh3 PE=3 SV=1	1060	2	C	59.9824	7.71925	81.8535	64.0281
sp|O60160|OMH1_SCHPO	omh1	O-glycoside alpha-1,2-mannosyltransferase omh1 OS=Schizosaccharomyces pombe (strain 972 / ATCC 24843) GN=omh1 PE=3 SV=1	1454	2	C	36.7272	16.4299	75.7011	60.0338
sp|O94388|VPS92_SCHPO	vps902	Vacuolar protein sorting-associated protein 9b OS=Schizosaccharomyces pombe (strain 972 / ATCC 24843) GN=vps902 PE=1 SV=1	205	2	C	79.1744	64.897	105.268	84.8184
sp|Q9USM7|TIM23_SCHPO	tim23	Mitochondrial import inner membrane translocase subunit tim23 OS=Schizosaccharomyces pombe (strain 972 / ATCC 24843) GN=tim23 PE=3 SV=1	1273	2	C	290.207	291.352	240.136	197.587
sp|P18253|CYPH_SCHPO	ppi1	Peptidyl-prolyl cis-trans isomerase OS=Schizosaccharomyces pombe (strain 972 / ATCC 24843) GN=ppi1 PE=3 SV=1	1124	2	C	202.295	196.209	129.036	106.936
sp|O13633|YNF5_SCHPO	pi041	Uncharacterized J domain-containing protein C17A3.05c OS=Schizosaccharomyces pombe (strain 972 / ATCC 24843) GN=pi041 PE=1 SV=1	1376	2	C	224.303	188.806	301.065	252.65
sp|O74729|PPIH_SCHPO	cyp3	Peptidyl-prolyl cis-trans isomerase cyp3 OS=Schizosaccharomyces pombe (strain 972 / ATCC 24843) GN=cyp3 PE=3 SV=1	966	2	C	41.1851	14.428	44.4136	37.3052
sp|O13892|YE38_SCHPO	SPAC20G4.08	Uncharacterized protein C20G4.08 OS=Schizosaccharomyces pombe (strain 972 / ATCC 24843) GN=SPAC20G4.08 PE=1 SV=2	1555	2	C	76.3971	46.946	79.6261	67.427
sp|O74745|ANP1_SCHPO	anp1	Mannan polymerase II complex anp1 subunit OS=Schizosaccharomyces pombe (strain 972 / ATCC 24843) GN=anp1 PE=3 SV=1	876	2	C	115.358	126.609	102.522	87.316
sp|O74988|COX5_SCHPO	cox5	Cytochrome c oxidase polypeptide 5, mitochondrial OS=Schizosaccharomyces pombe (strain 972 / ATCC 24843) GN=cox5 PE=3 SV=2	1219	2	C	67.34	80.4148	79.7046	67.9412
sp|Q10183|YAW8_SCHPO	SPAC3F10.08c	Uncharacterized protein C3F10.08c OS=Schizosaccharomyces pombe (strain 972 / ATCC 24843) GN=SPAC3F10.08c PE=1 SV=1	1027	2	C	141.375	118.317	84.3521	72.666
sp|Q9UTK0|NOB1_SCHPO	nob1	20S-pre-rRNA D-site endonuclease nob1 OS=Schizosaccharomyces pombe (strain 972 / ATCC 24843) GN=nob1 PE=3 SV=1	130	2	C	113.109	178.521	115.677	100.486
sp|Q9P783|RRB1_SCHPO	rrb1	Ribosome assembly protein rrb1 OS=Schizosaccharomyces pombe (strain 972 / ATCC 24843) GN=rrb1 PE=1 SV=1	15	2	C	53.4688	63.0684	135.198	117.543
sp|Q9UUA0|ECM1_SCHPO	SPCC23B6.02c	Shuttling pre-60S factor C23B6.02c OS=Schizosaccharomyces pombe (strain 972 / ATCC 24843) GN=SPCC23B6.02c PE=3 SV=2	1561	2	C	62.0061	92.24	203.679	177.65
sp|O74393|MAK5_SCHPO	mak5	ATP-dependent RNA helicase mak5 OS=Schizosaccharomyces pombe (strain 972 / ATCC 24843) GN=mak5 PE=1 SV=1	38	2	C	38.8193	14.7098	75.2984	66.463
sp|O14029|SEC16_SCHPO	sec16	COPII coat assembly protein sec16 OS=Schizosaccharomyces pombe (strain 972 / ATCC 24843) GN=sec16 PE=1 SV=2	126	2	C	55.6983	42.5743	71.0042	62.8401
sp|P04551|CDK1_SCHPO	cdc2	Cyclin-dependent kinase 1 OS=Schizosaccharomyces pombe (strain 972 / ATCC 24843) GN=cdc2 PE=1 SV=1	1287	2	C	287.855	189.007	265.426	234.919
sp|O74763|YBE8_SCHPO	SPBC17D11.08	Uncharacterized WD repeat-containing protein C17D11.08 OS=Schizosaccharomyces pombe (strain 972 / ATCC 24843) GN=SPBC17D11.08 PE=1 SV=1	479	2	C	172.145	155.019	178.393	157.902
sp|O14140|DSS1_SCHPO	dss1	mRNA export factor dss1 OS=Schizosaccharomyces pombe (strain 972 / ATCC 24843) GN=dss1 PE=1 SV=1	49	2	C	84.6045	132.032	128.137	113.67
sp|O74453|SKB15_SCHPO	skb15	Shk1 kinase-binding protein 15 OS=Schizosaccharomyces pombe (strain 972 / ATCC 24843) GN=skb15 PE=3 SV=1	1377	2	C	136.49	121.411	116.084	103.357
sp|O14341|RM35_SCHPO	SPBC2F12.10	54S ribosomal protein L35, mitochondrial OS=Schizosaccharomyces pombe (strain 972 / ATCC 24843) GN=SPBC2F12.10 PE=3 SV=2	1318	2	C	95.7493	110.818	129.314	115.696
sp|O42906|GPN1_SCHPO	SPBC119.15	GPN-loop GTPase 1 OS=Schizosaccharomyces pombe (strain 972 / ATCC 24843) GN=SPBC119.15 PE=1 SV=1	1063	2	C	92.1048	44.0418	99.8278	89.4172
sp|Q10297|IMB5_SCHPO	kap114	Importin subunit beta-5 OS=Schizosaccharomyces pombe (strain 972 / ATCC 24843) GN=kap114 PE=3 SV=3	1173	2	C	148.67	63.1493	81.5807	73.5117
sp|Q09179|GLNA_SCHPO	gln1	Glutamine synthetase OS=Schizosaccharomyces pombe (strain 972 / ATCC 24843) GN=gln1 PE=1 SV=2	303	2	C	113.385	54.5286	104.687	94.6846
sp|O94340|YHM7_SCHPO	SPBC1271.07c	Uncharacterized N-acetyltransferase C1271.07c OS=Schizosaccharomyces pombe (strain 972 / ATCC 24843) GN=SPBC1271.07c PE=3 SV=1	967	2	C	273.695	260.148	297.09	269.133
sp|O74511|EKC1_SCHPO	ekc1	Extragenic suppressor of kinetochore protein 1 OS=Schizosaccharomyces pombe (strain 972 / ATCC 24843) GN=ekc1 PE=1 SV=2	312	2	C	377.093	394.893	110.21	100.013
sp|Q9UTT2|RSE1_SCHPO	prp12	Pre-mRNA-splicing factor prp12 OS=Schizosaccharomyces pombe (strain 972 / ATCC 24843) GN=prp12 PE=1 SV=1	188	2	C	88.4188	90.8274	97.1027	88.2026
sp|O74178|KES1_SCHPO	kes1	Protein kes1 OS=Schizosaccharomyces pombe (strain 972 / ATCC 24843) GN=kes1 PE=2 SV=2	552	2	C	411.935	429.273	441.426	401.697
sp|O74521|YCPF_SCHPO	SPCC663.15c	Uncharacterized protein C663.15c OS=Schizosaccharomyces pombe (strain 972 / ATCC 24843) GN=SPCC663.15c PE=4 SV=2	557	2	C	103.069	139.088	138.154	127.001
sp|O74184|WAT1_SCHPO	wat1	WD repeat-containing protein wat1 OS=Schizosaccharomyces pombe (strain 972 / ATCC 24843) GN=wat1 PE=1 SV=1	1487	2	C	74.3965	108.613	78.3504	72.3605
sp|Q09895|YAI8_SCHPO	SPAC24B11.08c	Uncharacterized protein C24B11.08c OS=Schizosaccharomyces pombe (strain 972 / ATCC 24843) GN=SPAC24B11.08c PE=3 SV=1	1286	2	C	79.6256	88.0655	99.0792	91.7078
sp|O74485|CUE3_SCHPO	SPCC1906.02c	CUE domain-containing protein 3 OS=Schizosaccharomyces pombe (strain 972 / ATCC 24843) GN=SPCC1906.02c PE=1 SV=1	1105	2	C	100.768	77.358	109.523	101.625
sp|O42882|YFQ5_SCHPO	SPAC8E11.05c	Uncharacterized protein C8E11.05c OS=Schizosaccharomyces pombe (strain 972 / ATCC 24843) GN=SPAC8E11.05c PE=4 SV=1	1446	2	C	45.7832	53.3086	66.1107	61.4152
sp|O43063|PSB1_SCHPO	pre3	Probable proteasome subunit beta type-1 OS=Schizosaccharomyces pombe (strain 972 / ATCC 24843) GN=pre3 PE=3 SV=1	697	2	C	128.678	84.6653	107.72	100.494
sp|Q9HDY0|YPT71_SCHPO	ypt71	GTP-binding protein ypt71 OS=Schizosaccharomyces pombe (strain 972 / ATCC 24843) GN=ypt71 PE=3 SV=1	550	2	C	66.4797	87.2263	58.7509	54.8214
sp|O14255|GCS1_SCHPO	SPAC6G10.09	Probable mannosyl-oligosaccharide glucosidase OS=Schizosaccharomyces pombe (strain 972 / ATCC 24843) GN=SPAC6G10.09 PE=3 SV=1	1514	2	C	83.8986	114.701	86.892	81.1356
sp|O94560|YGD1_SCHPO	SPBC1773.01	Uncharacterized WD repeat-containing protein C1773.01 OS=Schizosaccharomyces pombe (strain 972 / ATCC 24843) GN=SPBC1773.01 PE=3 SV=1	731	2	C	143.647	156.241	167.474	156.494
sp|P41389|MCM5_SCHPO	mcm5	DNA replication licensing factor mcm5 OS=Schizosaccharomyces pombe (strain 972 / ATCC 24843) GN=mcm5 PE=1 SV=2	1227	2	C	206.438	411.578	81.7343	76.4679
sp|Q10422|YDC1_SCHPO	SPAC25G10.01	Uncharacterized RNA-binding protein C25G10.01 OS=Schizosaccharomyces pombe (strain 972 / ATCC 24843) GN=SPAC25G10.01 PE=1 SV=1	1102	2	C	230.409	173.734	215.708	201.848
sp|Q10287|BGS1_SCHPO	bgs1	1,3-beta-glucan synthase component bgs1 OS=Schizosaccharomyces pombe (strain 972 / ATCC 24843) GN=bgs1 PE=1 SV=1	741	2	C	446.06	272.597	164.477	154.38
sp|Q9P7J4|MFT1_SCHPO	mft1	THO complex subunit mft1 OS=Schizosaccharomyces pombe (strain 972 / ATCC 24843) GN=mft1 PE=3 SV=1	982	2	C	96.4335	58.0862	116.01	109.356
sp|Q9USU2|DIM1_SCHPO	dim1	Dimethyladenosine transferase OS=Schizosaccharomyces pombe (strain 972 / ATCC 24843) GN=dim1 PE=3 SV=1	1520	2	C	40.5674	21.115	50.4001	47.5809
sp|O14179|SDO1_SCHPO	sdo1	Ribosome maturation protein sdo1 OS=Schizosaccharomyces pombe (strain 972 / ATCC 24843) GN=sdo1 PE=3 SV=1	1473	2	C	207.043	236.801	189.18	178.698
sp|O13813|TOM22_SCHPO	tom22	Mitochondrial import receptor subunit tom22 OS=Schizosaccharomyces pombe (strain 972 / ATCC 24843) GN=tom22 PE=3 SV=1	1159	2	C	97.959	110.439	83.6792	79.1955
sp|Q9UTG4|RS26B_SCHPO	rps26b	40S ribosomal protein S26-B OS=Schizosaccharomyces pombe (strain 972 / ATCC 24843) GN=rps26b PE=3 SV=1	759	2	C	249.355	157.536	159.178	150.928
sp|Q10428|2AD1_SCHPO	par1	Serine/threonine-protein phosphatase 2A 56 kDa regulatory subunit delta 1 isoform OS=Schizosaccharomyces pombe (strain 972 / ATCC 24843) GN=par1 PE=1 SV=1	1334	2	C	251.811	287.506	255.71	242.57
sp|Q9HDZ8|YKP6_SCHPO	SPAC589.06c	Uncharacterized protein C589.06c OS=Schizosaccharomyces pombe (strain 972 / ATCC 24843) GN=SPAC589.06c PE=1 SV=1	1062	2	C	79.579	42.1235	63.8505	60.6972
sp|O43075|YGWC_SCHPO	pi053	Probable transcriptional regulatory protein C8D2.12c OS=Schizosaccharomyces pombe (strain 972 / ATCC 24843) GN=pi053 PE=3 SV=2	1380	2	C	102.127	80.4816	113.401	108.024
sp|O94559|YF65_SCHPO	SPAC23C4.05c	Uncharacterized protein C23C4.05c OS=Schizosaccharomyces pombe (strain 972 / ATCC 24843) GN=SPAC23C4.05c PE=3 SV=1	1291	2	C	50.1312	30.6361	59.132	56.6018
sp|Q9Y7U0|YCJE_SCHPO	SPCC63.14	Uncharacterized protein C63.14 OS=Schizosaccharomyces pombe (strain 972 / ATCC 24843) GN=SPCC63.14 PE=1 SV=1	622	2	C	230.489	224.897	132.555	126.961
sp|O13835|IMP3_SCHPO	imp3	U3 small nucleolar ribonucleoprotein protein imp3 OS=Schizosaccharomyces pombe (strain 972 / ATCC 24843) GN=imp3 PE=3 SV=1	1405	2	C	237.966	218.125	155.766	150.386
sp|O59706|SAP61_SCHPO	sap61	Pre-mRNA-splicing factor sap61 OS=Schizosaccharomyces pombe (strain 972 / ATCC 24843) GN=sap61 PE=1 SV=1	1352	2	C	165.977	171.574	170.047	164.601
sp|P49731|MCM6_SCHPO	mcm6	DNA replication licensing factor mcm6 OS=Schizosaccharomyces pombe (strain 972 / ATCC 24843) GN=mcm6 PE=1 SV=2	244	2	C	165.348	205.445	107.078	104.012
sp|Q10099|SEH1_SCHPO	seh1	Nucleoporin seh1 OS=Schizosaccharomyces pombe (strain 972 / ATCC 24843) GN=seh1 PE=1 SV=1	530	2	C	184.136	178.375	117.93	114.583
sp|Q9P7R4|UBC8_SCHPO	ubc8	Ubiquitin-conjugating enzyme E2 8 OS=Schizosaccharomyces pombe (strain 972 / ATCC 24843) GN=ubc8 PE=3 SV=1	1439	2	C	174.522	125.923	147.512	143.513
sp|Q9UTE3|SEB1_SCHPO	seb1	Rpb7-binding protein seb1 OS=Schizosaccharomyces pombe (strain 972 / ATCC 24843) GN=seb1 PE=1 SV=3	24	2	C	73.9514	149.568	103.78	101.338
sp|O14254|IDHP_SCHPO	idp1	Probable isocitrate dehydrogenase [NADP], mitochondrial OS=Schizosaccharomyces pombe (strain 972 / ATCC 24843) GN=idp1 PE=3 SV=2	767	2	C	220.445	209.381	216.987	211.925
sp|P23636|PP2A2_SCHPO	ppa2	Major serine/threonine-protein phosphatase PP2A-2 catalytic subunit OS=Schizosaccharomyces pombe (strain 972 / ATCC 24843) GN=ppa2 PE=3 SV=1	945	2	C	66.5799	61.1251	48.3009	47.1996
sp|O60171|TAF10_SCHPO	taf10	Transcription initiation factor TFIID subunit 10 OS=Schizosaccharomyces pombe (strain 972 / ATCC 24843) GN=taf10 PE=3 SV=1	1106	2	C	79.1675	73.4808	90.2072	88.4438
sp|O14148|INO80_SCHPO	ino80	Putative DNA helicase ino80 OS=Schizosaccharomyces pombe (strain 972 / ATCC 24843) GN=ino80 PE=1 SV=4	1302	2	C	64.5822	41.3746	52.0822	51.1643
sp|O14228|PUR4_SCHPO	ade3	Probable phosphoribosylformylglycinamidine synthase OS=Schizosaccharomyces pombe (strain 972 / ATCC 24843) GN=ade3 PE=3 SV=1	578	2	C	102.435	170.365	132.306	130.122
sp|Q9UUE5|NUP85_SCHPO	nup85	Nucleoporin nup85 OS=Schizosaccharomyces pombe (strain 972 / ATCC 24843) GN=nup85 PE=1 SV=1	1198	2	C	28.7661	77.2881	103.799	102.186
sp|Q9C100|PMT2_SCHPO	ogm2	Dolichyl-phosphate-mannose--protein mannosyltransferase 2 OS=Schizosaccharomyces pombe (strain 972 / ATCC 24843) GN=ogm2 PE=3 SV=1	445	2	C	133.652	216.33	110.93	109.461
sp|O13917|HPRT_SCHPO	hpt1	Hypoxanthine-guanine phosphoribosyltransferase OS=Schizosaccharomyces pombe (strain 972 / ATCC 24843) GN=hpt1 PE=3 SV=1	1659	2	C	135.042	177.041	140.988	139.445
sp|Q9HGL4|TRM6_SCHPO	gcd10	tRNA (adenine(58)-N(1))-methyltransferase non-catalytic subunit trm6 OS=Schizosaccharomyces pombe (strain 972 / ATCC 24843) GN=gcd10 PE=3 SV=1	1100	2	C	141.742	137.524	140.41	139.004
sp|O94672|SC232_SCHPO	sec232	Protein transport protein sec23-2 OS=Schizosaccharomyces pombe (strain 972 / ATCC 24843) GN=sec232 PE=1 SV=1	1262	2	C	171.23	175.378	123.498	122.454
sp|O60107|SNX41_SCHPO	snx41	Sorting nexin-41 OS=Schizosaccharomyces pombe (strain 972 / ATCC 24843) GN=snx41 PE=1 SV=1	783	2	C	152.776	189.057	165.235	164.491
sp|P54874|HMCS_SCHPO	hcs1	Hydroxymethylglutaryl-CoA synthase OS=Schizosaccharomyces pombe (strain 972 / ATCC 24843) GN=hcs1 PE=1 SV=1	1404	2	C	71.1655	72.6983	100.308	99.957
sp|Q9Y7M6|RRP1_SCHPO	SPBC9B6.07	Ribosomal RNA-processing protein 1 homolog OS=Schizosaccharomyces pombe (strain 972 / ATCC 24843) GN=SPBC9B6.07 PE=3 SV=1	118	2	C	269.443	262.374	316.615	315.736
sp|P78831|GHT5_SCHPO	ght5	High-affinity glucose transporter ght5 OS=Schizosaccharomyces pombe (strain 972 / ATCC 24843) GN=ght5 PE=1 SV=2	345	2	C	160.878	201.391	121.618	121.293
sp|Q9URT2|YJU3_SCHPO	SPCP25A2.03	Uncharacterized protein P25A2.03 OS=Schizosaccharomyces pombe (strain 972 / ATCC 24843) GN=SPCP25A2.03 PE=1 SV=1	1041	2	C	50.0585	79.7019	100.206	100.071
sp|Q9P6R9|CWC22_SCHPO	cwf22	Pre-mRNA-splicing factor cwf22 OS=Schizosaccharomyces pombe (strain 972 / ATCC 24843) GN=cwf22 PE=1 SV=3	710	2	C	448.848	300.857	158.804	158.905
sp|Q10163|RSMB_SCHPO	smb1	Small nuclear ribonucleoprotein-associated protein B OS=Schizosaccharomyces pombe (strain 972 / ATCC 24843) GN=smb1 PE=1 SV=1	1191	2	C	120.879	202.014	233.826	234.093
sp|P30666|MCM3_SCHPO	mcm3	DNA replication licensing factor mcm3 OS=Schizosaccharomyces pombe (strain 972 / ATCC 24843) GN=mcm3 PE=1 SV=2	989	2	C	47.2257	72.9991	92.6552	92.7706
sp|P87027|SPG1_SCHPO	spg1	Septum-promoting GTP-binding protein 1 OS=Schizosaccharomyces pombe (strain 972 / ATCC 24843) GN=spg1 PE=1 SV=1	910	2	C	151.07	102.872	136.272	136.791
sp|O94512|OBP1_SCHPO	obp1	Oxysterol-binding protein-like protein 1 OS=Schizosaccharomyces pombe (strain 972 / ATCC 24843) GN=obp1 PE=1 SV=1	647	2	C	110.674	125.847	113.243	113.736
sp|Q9UUG5|MLR1_SCHPO	rlc1	Myosin regulatory light chain 1 OS=Schizosaccharomyces pombe (strain 972 / ATCC 24843) GN=rlc1 PE=1 SV=1	461	2	C	268.923	180.335	98.9749	99.4858
sp|P41838|RAE1_SCHPO	rae1	Poly(A)+ RNA export protein OS=Schizosaccharomyces pombe (strain 972 / ATCC 24843) GN=rae1 PE=1 SV=1	1165	2	C	54.0002	93.5814	56.3942	56.7237
sp|O74333|NCE2_SCHPO	fhn1	Non-classical export protein 2 homolog OS=Schizosaccharomyces pombe (strain 972 / ATCC 24843) GN=fhn1 PE=3 SV=1	1222	2	C	1383.64	828.976	82.9771	83.5776
sp|O14080|YEAF_SCHPO	SPAC2E11.15	Uncharacterized protein UNK4,15 OS=Schizosaccharomyces pombe (strain 972 / ATCC 24843) GN=SPAC2E11.15 PE=4 SV=1	1626	2	C	70.7769	74.0613	70.7658	71.3369
sp|O74442|UBP16_SCHPO	ubp16	Probable ubiquitin carboxyl-terminal hydrolase 16 OS=Schizosaccharomyces pombe (strain 972 / ATCC 24843) GN=ubp16 PE=1 SV=1	1453	2	C	136.933	165.462	87.4963	88.4301
sp|O74362|ESF2_SCHPO	esf2	Pre-rRNA-processing protein esf2 OS=Schizosaccharomyces pombe (strain 972 / ATCC 24843) GN=esf2 PE=1 SV=1	1338	2	C	260.905	290.416	136.459	138.053
sp|Q9UTD3|YIP5_SCHPO	yip5	Protein YIP5 OS=Schizosaccharomyces pombe (strain 972 / ATCC 24843) GN=yip5 PE=3 SV=1	813	2	C	33.2965	15.9709	61.8182	62.6385
sp|P78898|TGCE2_SCHPO	SPBC16A3.12c	Probable lipase C16A3.12c OS=Schizosaccharomyces pombe (strain 972 / ATCC 24843) GN=SPBC16A3.12c PE=3 SV=2	933	2	C	72.2	94.5456	125.092	126.823
sp|P78780|DHAS_SCHPO	SPCC1827.06c	Probable aspartate-semialdehyde dehydrogenase OS=Schizosaccharomyces pombe (strain 972 / ATCC 24843) GN=SPCC1827.06c PE=1 SV=2	628	2	C	65.2803	84.8152	76.8683	77.9894
sp|Q09870|RCL1_SCHPO	SPAC12G12.06c	Probable RNA 3'-terminal phosphate cyclase-like protein OS=Schizosaccharomyces pombe (strain 972 / ATCC 24843) GN=SPAC12G12.06c PE=3 SV=1	1031	2	C	182.05	176.558	166.611	169.042
sp|Q9UT02|SEC7A_SCHPO	sec71	Protein transport protein sec71 OS=Schizosaccharomyces pombe (strain 972 / ATCC 24843) GN=sec71 PE=1 SV=1	1461	2	C	132.468	111.788	92.822	94.2421
sp|Q9Y7Y6|YOY4_SCHPO	SPBC342.04	Uncharacterized protein C342.04 OS=Schizosaccharomyces pombe (strain 972 / ATCC 24843) GN=SPBC342.04 PE=3 SV=1	640	2	C	91.7258	80.7429	115.476	117.37
sp|O13735|FAT1_SCHPO	fat1	Actin-interacting protein 3 homolog OS=Schizosaccharomyces pombe (strain 972 / ATCC 24843) GN=fat1 PE=1 SV=2	1290	2	C	75.8982	128.356	68.3509	69.527
sp|Q9UUB4|PUR7_SCHPO	ade7	Phosphoribosylaminoimidazole-succinocarboxamide synthase OS=Schizosaccharomyces pombe (strain 972 / ATCC 24843) GN=ade7 PE=3 SV=1	1314	2	C	82.278	104.745	80.2331	81.6749
sp|Q9USN8|RQC2_SCHPO	mtr1	Ribosome quality control complex subunit 2 OS=Schizosaccharomyces pombe (strain 972 / ATCC 24843) GN=mtr1 PE=1 SV=2	805	2	C	139.37	226.387	175.514	179.226
sp|O13901|YF3A_SCHPO	SPAC22A12.10	Uncharacterized CDP-alcohol phosphatidyltransferase class-I family protein C22A12.10 OS=Schizosaccharomyces pombe (strain 972 / ATCC 24843) GN=SPAC22A12.10 PE=3 SV=1	1718	2	C	70.9233	79.5788	84.4746	86.4187
sp|Q9URY2|ALP7_SCHPO	alp7	Microtubule protein alp7 OS=Schizosaccharomyces pombe (strain 972 / ATCC 24843) GN=alp7 PE=1 SV=1	1709	2	C	125.305	103.76	88.4881	90.5984
sp|Q9P3T7|ODC_SCHPO	SPAC328.09	Probable mitochondrial 2-oxodicarboxylate carrier OS=Schizosaccharomyces pombe (strain 972 / ATCC 24843) GN=SPAC328.09 PE=3 SV=1	923	2	C	170.263	172.787	356.148	364.802
sp|Q11118|WOS2_SCHPO	wos2	Protein wos2 OS=Schizosaccharomyces pombe (strain 972 / ATCC 24843) GN=wos2 PE=2 SV=1	993	2	C	83.2187	99.8506	79.2063	81.2871
sp|O94517|PSA1_SCHPO	SPBC646.16	Probable proteasome subunit alpha type-1 OS=Schizosaccharomyces pombe (strain 972 / ATCC 24843) GN=SPBC646.16 PE=3 SV=1	1256	2	C	214.488	240.541	180.908	185.792
sp|Q9USQ4|SIM3_SCHPO	sim3	NASP-related protein sim3 OS=Schizosaccharomyces pombe (strain 972 / ATCC 24843) GN=sim3 PE=1 SV=1	820	2	C	61.9407	107.711	84.05	86.4877
sp|P21911|SDHB_SCHPO	sdh2	Succinate dehydrogenase [ubiquinone] iron-sulfur subunit, mitochondrial OS=Schizosaccharomyces pombe (strain 972 / ATCC 24843) GN=sdh2 PE=3 SV=3	763	2	C	127.757	151.915	72.3094	74.5042
sp|P36595|RPAB2_SCHPO	rpb6	DNA-directed RNA polymerases I, II, and III subunit RPABC2 OS=Schizosaccharomyces pombe (strain 972 / ATCC 24843) GN=rpb6 PE=1 SV=1	1368	2	C	82.6896	98.8131	86.8484	89.788
sp|Q9HGK2|HOP2_SCHPO	meu13	Homologous-pairing protein 2 OS=Schizosaccharomyces pombe (strain 972 / ATCC 24843) GN=meu13 PE=1 SV=1	668	2	C	127.974	43.0139	91.4284	94.5689
sp|Q9P7R9|SYF1_SCHPO	cwf3	Pre-mRNA-splicing factor cwf3 OS=Schizosaccharomyces pombe (strain 972 / ATCC 24843) GN=cwf3 PE=1 SV=1	349	2	C	88.5685	118.699	129.534	134.194
sp|P50519|HSP9_SCHPO	hsp9	Heat shock protein hsp9 OS=Schizosaccharomyces pombe (strain 972 / ATCC 24843) GN=hsp9 PE=2 SV=1	1029	2	C	37.2835	44.4223	25.2044	26.1211
sp|P17478|RLA4_SCHPO	rpp202	60S acidic ribosomal protein P2-beta OS=Schizosaccharomyces pombe (strain 972 / ATCC 24843) GN=rpp202 PE=1 SV=1	918	2	C	217.2	148.281	152.597	158.242
sp|O13986|YEG4_SCHPO	SPAC26H5.04	Uncharacterized protein C26H5.04 OS=Schizosaccharomyces pombe (strain 972 / ATCC 24843) GN=SPAC26H5.04 PE=4 SV=3	1307	2	C	119.002	197.756	396.443	411.307
sp|Q9HDZ2|CWH43_SCHPO	cwh43	Protein cwh43 OS=Schizosaccharomyces pombe (strain 972 / ATCC 24843) GN=cwh43 PE=2 SV=2	1457	2	C	40.5011	77.5036	46.475	48.3503
sp|O13864|IMB1_SCHPO	kap95	Importin subunit beta-1 OS=Schizosaccharomyces pombe (strain 972 / ATCC 24843) GN=kap95 PE=3 SV=1	0	2	C	67.6342	101.16	66.3066	69.134
sp|P21696|GPD1_SCHPO	gpd1	Glycerol-3-phosphate dehydrogenase [NAD(+)] 1 OS=Schizosaccharomyces pombe (strain 972 / ATCC 24843) GN=gpd1 PE=1 SV=2	745	2	C	88.2588	58.8767	68.5368	71.5957
sp|Q9URY5|FHP_SCHPO	SPAC869.02c	Flavohemoprotein OS=Schizosaccharomyces pombe (strain 972 / ATCC 24843) GN=SPAC869.02c PE=3 SV=1	1001	2	C	155.957	184.411	139.064	145.538
sp|Q9UU99|YJX4_SCHPO	SPCC23B6.04c	CRAL-TRIO domain-containing protein C23B6.04c OS=Schizosaccharomyces pombe (strain 972 / ATCC 24843) GN=SPCC23B6.04c PE=1 SV=1	435	2	C	205.253	172.89	72.245	75.6516
sp|O42877|FCF2_SCHPO	fcf2	rRNA-processing protein fcf2 OS=Schizosaccharomyces pombe (strain 972 / ATCC 24843) GN=fcf2 PE=3 SV=1	1303	2	C	166.624	205.142	151.486	158.671
sp|O74787|CHO2_SCHPO	cho2	Phosphatidylethanolamine N-methyltransferase OS=Schizosaccharomyces pombe (strain 972 / ATCC 24843) GN=cho2 PE=1 SV=1	408	2	C	477.459	965.118	249.352	261.303
sp|O42661|SMD1_SCHPO	smd1	Small nuclear ribonucleoprotein Sm D1 OS=Schizosaccharomyces pombe (strain 972 / ATCC 24843) GN=smd1 PE=1 SV=1	1471	2	C	66.1311	62.78	83.4622	87.4686
sp|O94246|GSH0_SCHPO	SPCC737.06c	Putative glutamate--cysteine ligase regulatory subunit OS=Schizosaccharomyces pombe (strain 972 / ATCC 24843) GN=SPCC737.06c PE=3 SV=1	1295	2	C	93.3693	132.338	94.5018	99.2414
sp|O74519|YCPD_SCHPO	SPCC663.13c	Uncharacterized N-acetyltransferase C663.13c OS=Schizosaccharomyces pombe (strain 972 / ATCC 24843) GN=SPCC663.13c PE=3 SV=1	1309	2	C	33.2886	65.6761	109.252	114.797
sp|Q10432|CCQ1_SCHPO	ccq1	Coiled-coil quantitatively-enriched protein 1 OS=Schizosaccharomyces pombe (strain 972 / ATCC 24843) GN=ccq1 PE=1 SV=1	904	2	C	44.786	59.82	54.6353	57.4342
sp|O94363|RHB1_SCHPO	rhb1	GTP-binding protein rhb1 OS=Schizosaccharomyces pombe (strain 972 / ATCC 24843) GN=rhb1 PE=3 SV=1	1218	2	C	84.8336	97.7785	99.7663	105.181
sp|O60114|YG65_SCHPO	SPBC15C4.05	Uncharacterized helicase C15C4.05 OS=Schizosaccharomyces pombe (strain 972 / ATCC 24843) GN=SPBC15C4.05 PE=3 SV=1	1552	2	C	75.5554	39.0884	79.4092	83.8954
sp|Q10268|MAC1_SCHPO	mac1	Membrane-anchored protein 1 OS=Schizosaccharomyces pombe (strain 972 / ATCC 24843) GN=mac1 PE=1 SV=1	1664	2	C	100.162	76.6564	45.6925	48.2832
sp|P58234|RS19A_SCHPO	rps19a	40S ribosomal protein S19-A OS=Schizosaccharomyces pombe (strain 972 / ATCC 24843) GN=rps19a PE=2 SV=1	841	2	C	163.182	204.018	294.43	311.164
sp|O74907|BCP1_SCHPO	bcp1	Protein bcp1 OS=Schizosaccharomyces pombe (strain 972 / ATCC 24843) GN=bcp1 PE=3 SV=2	1054	2	C	40.4121	57.7524	58.6566	62.024
sp|P79009|RS25A_SCHPO	rps25a	40S ribosomal protein S25-A OS=Schizosaccharomyces pombe (strain 972 / ATCC 24843) GN=rps25a PE=3 SV=2	1107	2	C	46.6804	24.0441	87.314	92.8134
sp|O14466|DPM1_SCHPO	dpm1	Dolichol-phosphate mannosyltransferase OS=Schizosaccharomyces pombe (strain 972 / ATCC 24843) GN=dpm1 PE=2 SV=1	1393	2	C	49.6889	53.095	58.7686	62.525
sp|Q9URX9|PXR1_SCHPO	pxr1	Protein pxr1 OS=Schizosaccharomyces pombe (strain 972 / ATCC 24843) GN=pxr1 PE=1 SV=1	653	2	C	551.978	522.727	236.44	252.378
sp|O42699|RL19B_SCHPO	rpl19b	60S ribosomal protein L19-B OS=Schizosaccharomyces pombe (strain 972 / ATCC 24843) GN=rpl19b PE=2 SV=2	371	2	C	116.684	218.061	151.801	162.039
sp|O94657|XDJ1_SCHPO	xdj1	DnaJ protein homolog xdj1 OS=Schizosaccharomyces pombe (strain 972 / ATCC 24843) GN=xdj1 PE=3 SV=1	686	2	C	37.9617	24.8072	67.5531	72.1211
sp|P79088|SC61A_SCHPO	sec61	Protein transport protein sec61 subunit alpha OS=Schizosaccharomyces pombe (strain 972 / ATCC 24843) GN=sec61 PE=2 SV=1	1606	2	C	106.374	127.603	122.731	131.056
sp|Q10414|MU161_SCHPO	mug161	CWF19-like protein mug161 OS=Schizosaccharomyces pombe (strain 972 / ATCC 24843) GN=mug161 PE=1 SV=1	1663	2	C	170.564	249.797	138.764	148.397
sp|Q09177|RPAC2_SCHPO	rpc19	DNA-directed RNA polymerases I and III subunit RPAC2 OS=Schizosaccharomyces pombe (strain 972 / ATCC 24843) GN=rpc19 PE=2 SV=1	1142	2	C	87.8351	71.8368	84.1578	90.0211
sp|Q9P6I7|ADE_SCHPO	aah1	Adenine deaminase OS=Schizosaccharomyces pombe (strain 972 / ATCC 24843) GN=aah1 PE=1 SV=1	927	2	C	131.795	109.132	98.4565	105.446
sp|O43050|ERG26_SCHPO	erg26	Sterol-4-alpha-carboxylate 3-dehydrogenase, decarboxylating OS=Schizosaccharomyces pombe (strain 972 / ATCC 24843) GN=erg26 PE=3 SV=1	1257	2	C	195.538	142.81	104.421	111.863
sp|Q09911|YAJE_SCHPO	SPAC30D11.14c	Uncharacterized protein C30D11.14c OS=Schizosaccharomyces pombe (strain 972 / ATCC 24843) GN=SPAC30D11.14c PE=4 SV=1	528	2	C	118.152	68.7416	54.1424	58.0692
sp|Q09779|THO2_SCHPO	tho2	THO complex subunit 2 OS=Schizosaccharomyces pombe (strain 972 / ATCC 24843) GN=tho2 PE=1 SV=3	1387	2	C	70.7524	61.1329	74.9586	80.4629
sp|Q9P7H8|ECM29_SCHPO	ecm29	Proteasome component ecm29 OS=Schizosaccharomyces pombe (strain 972 / ATCC 24843) GN=ecm29 PE=1 SV=1	75	2	C	180.381	168.246	257.748	276.805
sp|Q10178|SF3B1_SCHPO	prp10	U2 snRNP component prp10 OS=Schizosaccharomyces pombe (strain 972 / ATCC 24843) GN=prp10 PE=1 SV=3	934	2	C	124.602	109.328	97.9162	105.396
sp|O94504|TRX2_SCHPO	trx2	Thioredoxin-2, mitochondrial OS=Schizosaccharomyces pombe (strain 972 / ATCC 24843) GN=trx2 PE=1 SV=2	502	2	C	185.107	223.556	138.741	149.525
sp|Q9P6P8|YIP4_SCHPO	SPAC644.13c	Protein YIP4 OS=Schizosaccharomyces pombe (strain 972 / ATCC 24843) GN=SPAC644.13c PE=1 SV=1	301	2	C	130.229	103.234	120.795	130.289
sp|O94508|CWF11_SCHPO	cwf11	Pre-mRNA-splicing factor cwf11 OS=Schizosaccharomyces pombe (strain 972 / ATCC 24843) GN=cwf11 PE=1 SV=1	772	2	C	92.8488	90.7091	132.606	143.264
sp|Q9USZ7|END3_SCHPO	end3	Actin cytoskeleton-regulatory complex protein end3 OS=Schizosaccharomyces pombe (strain 972 / ATCC 24843) GN=end3 PE=3 SV=1	682	2	C	448.448	345.893	53.8199	58.1695
sp|O42911|RT25_SCHPO	rsm25	37S ribosomal protein S25, mitochondrial OS=Schizosaccharomyces pombe (strain 972 / ATCC 24843) GN=rsm25 PE=3 SV=1	394	2	C	93.3345	85.7724	120.505	130.651
sp|Q10168|NSP1_SCHPO	nsp1	Nucleoporin nsp1 OS=Schizosaccharomyces pombe (strain 972 / ATCC 24843) GN=nsp1 PE=1 SV=1	561	2	C	54.3395	59.2918	92.5145	100.454
sp|O74483|LSM8_SCHPO	lsm8	U6 snRNA-associated Sm-like protein LSm8 OS=Schizosaccharomyces pombe (strain 972 / ATCC 24843) GN=lsm8 PE=3 SV=1	1698	2	C	75.8063	72.5487	249.064	270.797
sp|Q8WZK0|US107_SCHPO	usp107	U1 snRNP-associated protein usp107 OS=Schizosaccharomyces pombe (strain 972 / ATCC 24843) GN=usp107 PE=1 SV=1	132	2	C	120.283	179.888	87.1672	94.9357
sp|Q9Y809|NAA25_SCHPO	arm1	N-terminal acetyltransferase B complex subunit arm1 OS=Schizosaccharomyces pombe (strain 972 / ATCC 24843) GN=arm1 PE=3 SV=1	1040	2	C	83.0482	129.333	106.709	116.265
sp|Q10295|PAP_SCHPO	pla1	Poly(A) polymerase pla1 OS=Schizosaccharomyces pombe (strain 972 / ATCC 24843) GN=pla1 PE=1 SV=1	387	2	C	80.017	85.6268	146.49	159.677
sp|Q10071|STE24_SCHPO	SPAC3H1.05	Probable CAAX prenyl protease 1 OS=Schizosaccharomyces pombe (strain 972 / ATCC 24843) GN=SPAC3H1.05 PE=3 SV=1	973	2	C	135.562	238.095	194.835	212.703
sp|O14470|SSR2_SCHPO	ssr2	SWI/SNF and RSC complexes subunit ssr2 OS=Schizosaccharomyces pombe (strain 972 / ATCC 24843) GN=ssr2 PE=1 SV=3	1422	2	C	47.0977	58.9927	78.0812	85.2892
sp|O13742|VPH1_SCHPO	vph1	V-type proton ATPase subunit a OS=Schizosaccharomyces pombe (strain 972 / ATCC 24843) GN=vph1 PE=3 SV=2	1210	2	C	148.812	198.486	149.27	163.292
sp|Q9C1W3|ERG1_SCHPO	erg1	Probable squalene monooxygenase OS=Schizosaccharomyces pombe (strain 972 / ATCC 24843) GN=erg1 PE=3 SV=1	407	2	C	71.8475	85.6585	101.283	110.957
sp|Q10436|YDE2_SCHPO	SPAC12B10.02c	Uncharacterized protein C12B10.02c OS=Schizosaccharomyces pombe (strain 972 / ATCC 24843) GN=SPAC12B10.02c PE=4 SV=1	1515	2	C	74.1373	100.202	95.6701	105.026
sp|Q10316|ARPC5_SCHPO	arc5	Actin-related protein 2/3 complex subunit 5 OS=Schizosaccharomyces pombe (strain 972 / ATCC 24843) GN=arc5 PE=1 SV=1	10	2	C	42.8231	47.6602	39.4039	43.2631
sp|P87114|FFT1_SCHPO	fft1	ATP-dependent helicase fft1 OS=Schizosaccharomyces pombe (strain 972 / ATCC 24843) GN=fft1 PE=3 SV=1	347	2	C	90.2675	97.3618	113.872	125.323
sp|Q9P6M9|RM01_SCHPO	mrpl1	54S ribosomal protein L1, mitochondrial OS=Schizosaccharomyces pombe (strain 972 / ATCC 24843) GN=mrpl1 PE=3 SV=1	1333	2	C	81.8027	71.6274	105.433	116.13
sp|O14178|RM40_SCHPO	mrpl40	54S ribosomal protein L40, mitochondrial OS=Schizosaccharomyces pombe (strain 972 / ATCC 24843) GN=mrpl40 PE=3 SV=1	1369	2	C	138.017	97.0714	237.802	262.79
sp|Q9P7G9|KAPS_SCHPO	met14	Adenylyl-sulfate kinase OS=Schizosaccharomyces pombe (strain 972 / ATCC 24843) GN=met14 PE=3 SV=1	1358	2	C	408.136	358.34	307.577	340.685
sp|Q9UTE4|YFM8_SCHPO	SPAC222.08c	Uncharacterized glutaminase C222.08c OS=Schizosaccharomyces pombe (strain 972 / ATCC 24843) GN=SPAC222.08c PE=3 SV=1	418	2	C	285.51	257.436	229.622	254.564
sp|Q9UTJ4|CGR1_SCHPO	cgr1	rRNA-processing protein cgr1 OS=Schizosaccharomyces pombe (strain 972 / ATCC 24843) GN=cgr1 PE=3 SV=1	1493	2	C	138.13	95.454	1247.94	1390.03
sp|Q09697|RGA8_SCHPO	rga8	Rho-GTPase-activating protein 8 OS=Schizosaccharomyces pombe (strain 972 / ATCC 24843) GN=rga8 PE=1 SV=1	384	2	C	125.536	105.397	151.47	168.732
sp|O13880|VHT1_SCHPO	vht1	Vitamin H transporter 1 OS=Schizosaccharomyces pombe (strain 972 / ATCC 24843) GN=vht1 PE=2 SV=1	1017	2	C	226.28	214.163	104.796	117.304
sp|O42881|APTH1_SCHPO	SPAC8E11.04c	Acyl-protein thioesterase 1 OS=Schizosaccharomyces pombe (strain 972 / ATCC 24843) GN=SPAC8E11.04c PE=3 SV=1	906	2	C	55.0147	95.4591	98.7627	110.558
sp|Q10343|AAKG_SCHPO	cbs2	5'-AMP-activated protein kinase subunit gamma OS=Schizosaccharomyces pombe (strain 972 / ATCC 24843) GN=cbs2 PE=1 SV=2	1073	2	C	123.542	160.481	197.027	221.56
sp|O14443|GPN3_SCHPO	fet5	GPN-loop GTPase 3 OS=Schizosaccharomyces pombe (strain 972 / ATCC 24843) GN=fet5 PE=2 SV=1	786	2	C	75.1137	107.419	128.301	144.334
sp|Q9Y7U6|RGF1_SCHPO	rgf1	Rho1 guanine nucleotide exchange factor 1 OS=Schizosaccharomyces pombe (strain 972 / ATCC 24843) GN=rgf1 PE=1 SV=1	1447	2	C	205.271	165.889	172.172	193.959
sp|Q9UTP9|DBP4_SCHPO	dbp4	ATP-dependent RNA helicase dbp4 OS=Schizosaccharomyces pombe (strain 972 / ATCC 24843) GN=dbp4 PE=1 SV=1	975	2	C	88.0281	93.8255	98.4173	111.33
sp|Q9Y7Z5|TTS1_SCHPO	tts1	Tetra-spanning protein 1 OS=Schizosaccharomyces pombe (strain 972 / ATCC 24843) GN=tts1 PE=1 SV=1	1096	2	C	28.472	25.1854	41.9036	47.424
sp|Q09849|ARP42_SCHPO	arp42	SWI/SNF and RSC complexes subunit arp42 OS=Schizosaccharomyces pombe (strain 972 / ATCC 24843) GN=arp42 PE=1 SV=2	1042	2	C	89.5437	87.0889	114.035	129.105
sp|O42649|SMC3_SCHPO	psm3	Structural maintenance of chromosomes protein 3 OS=Schizosaccharomyces pombe (strain 972 / ATCC 24843) GN=psm3 PE=1 SV=1	150	2	C	69.6726	83.2651	108.716	123.169
sp|P17609|YPT2_SCHPO	ypt2	GTP-binding protein ypt2 OS=Schizosaccharomyces pombe (strain 972 / ATCC 24843) GN=ypt2 PE=3 SV=1	1070	2	C	122.582	190.503	132.125	150.136
sp|O74901|YCS1_SCHPO	SPCC613.01	Uncharacterized protein CC613.01 OS=Schizosaccharomyces pombe (strain 972 / ATCC 24843) GN=SPCC613.01 PE=1 SV=1	1617	2	C	196.707	256.094	37.4166	42.5472
sp|Q09793|NUP45_SCHPO	nup45	Nucleoporin nup45 OS=Schizosaccharomyces pombe (strain 972 / ATCC 24843) GN=nup45 PE=1 SV=2	1417	2	C	165.849	321.225	116.447	132.513
sp|O94461|YFFL_SCHPO	SPAC1687.21	Probable phosphatase C1687.21 OS=Schizosaccharomyces pombe (strain 972 / ATCC 24843) GN=SPAC1687.21 PE=3 SV=1	1045	2	C	20.8084	38.9277	54.4129	61.993
sp|P87228|SERA_SCHPO	SPCC364.07	Putative D-3-phosphoglycerate dehydrogenase OS=Schizosaccharomyces pombe (strain 972 / ATCC 24843) GN=SPCC364.07 PE=1 SV=1	660	2	C	112.377	72.7906	90.8145	103.477
sp|O43028|VAC8_SCHPO	vac8	Vacuolar protein 8 OS=Schizosaccharomyces pombe (strain 972 / ATCC 24843) GN=vac8 PE=1 SV=4	70	2	C	121.556	144.997	154.53	176.2
sp|Q9UU88|KAD6_SCHPO	SPCC830.11c	Adenylate kinase isoenzyme 6 homolog OS=Schizosaccharomyces pombe (strain 972 / ATCC 24843) GN=SPCC830.11c PE=3 SV=1	1361	2	C	99.4863	104.131	113.502	129.568
sp|Q9UUH3|MUG58_SCHPO	mug58	Uncharacterized kinase mug58 OS=Schizosaccharomyces pombe (strain 972 / ATCC 24843) GN=mug58 PE=1 SV=1	1134	2	C	74.0567	42.3038	71.5808	81.7333
sp|O74314|MET7_SCHPO	SPBC15D4.09c	Probable cystathionine gamma-synthase OS=Schizosaccharomyces pombe (strain 972 / ATCC 24843) GN=SPBC15D4.09c PE=3 SV=1	415	2	C	146.207	128.445	123.454	141.358
sp|Q9Y7J6|PPK21_SCHPO	ppk21	Serine/threonine-protein kinase ppk21 OS=Schizosaccharomyces pombe (strain 972 / ATCC 24843) GN=ppk21 PE=1 SV=3	1597	2	C	129.901	95.7961	107.846	123.57
sp|Q9UUN5|PRA1_SCHPO	SPCC306.02c	PRA1-like protein OS=Schizosaccharomyces pombe (strain 972 / ATCC 24843) GN=SPCC306.02c PE=2 SV=1	495	2	C	109.951	85.9412	85.7663	98.7836
sp|O43047|GRPE_SCHPO	mge1	GrpE protein homolog, mitochondrial OS=Schizosaccharomyces pombe (strain 972 / ATCC 24843) GN=mge1 PE=3 SV=1	395	2	C	48.9247	39.7238	50.6475	58.8062
sp|P33277|GAP1_SCHPO	gap1	GTPase-activating protein OS=Schizosaccharomyces pombe (strain 972 / ATCC 24843) GN=gap1 PE=3 SV=1	299	2	C	67.9595	82.8921	95.9169	111.59
sp|O74505|YJD2_SCHPO	SPCC594.02c	Uncharacterized protein C594.02c OS=Schizosaccharomyces pombe (strain 972 / ATCC 24843) GN=SPCC594.02c PE=1 SV=1	1144	2	C	225.251	144.529	141.957	166.408
sp|Q9HFE5|AP1M1_SCHPO	apm1	AP-1 complex subunit mu-1 OS=Schizosaccharomyces pombe (strain 972 / ATCC 24843) GN=apm1 PE=1 SV=1	1075	2	C	43.7707	9.87303	82.3229	96.7514
sp|Q12381|PRP1_SCHPO	prp1	Pre-mRNA-splicing factor prp1 OS=Schizosaccharomyces pombe (strain 972 / ATCC 24843) GN=prp1 PE=1 SV=1	128	2	C	165.095	122.423	167.4	196.995
sp|Q9Y7T7|PRP28_SCHPO	prp28	Pre-mRNA-splicing ATP-dependent RNA helicase prp28 OS=Schizosaccharomyces pombe (strain 972 / ATCC 24843) GN=prp28 PE=3 SV=1	914	2	C	71.2533	100.221	85.7443	101.249
sp|O13793|FSF1_SCHPO	fsf1	Probable mitochondrial transport protein fsf1 OS=Schizosaccharomyces pombe (strain 972 / ATCC 24843) GN=fsf1 PE=3 SV=2	1261	2	C	98.3143	95.8876	82.0325	97.3141
sp|O13796|RCQ1_SCHPO	rqc1	Ribosome quality control complex subunit 1 OS=Schizosaccharomyces pombe (strain 972 / ATCC 24843) GN=rqc1 PE=1 SV=2	1008	2	C	82.6338	112.943	95.6301	113.523
sp|O42668|TPR1_SCHPO	tpr1	Tetratricopeptide repeat protein 1 OS=Schizosaccharomyces pombe (strain 972 / ATCC 24843) GN=tpr1 PE=1 SV=1	1542	2	C	115.408	129.618	131.813	157.28
sp|O74755|PST3_SCHPO	pst3	Paired amphipathic helix protein pst3 OS=Schizosaccharomyces pombe (strain 972 / ATCC 24843) GN=pst3 PE=3 SV=1	1113	2	C	38.2153	82.3756	46.474	55.6344
sp|O43003|MMF1_SCHPO	mmf1	Protein mmf1, mitochondrial OS=Schizosaccharomyces pombe (strain 972 / ATCC 24843) GN=mmf1 PE=3 SV=1	1467	2	C	104.833	79.9242	43.2833	51.85
sp|O14230|FPPS_SCHPO	fps1	Farnesyl pyrophosphate synthase OS=Schizosaccharomyces pombe (strain 972 / ATCC 24843) GN=fps1 PE=1 SV=1	579	2	C	54.8783	32.1428	61.4811	73.7645
sp|O14313|PMP20_SCHPO	pmp20	Putative peroxiredoxin pmp20 OS=Schizosaccharomyces pombe (strain 972 / ATCC 24843) GN=pmp20 PE=2 SV=2	1193	2	C	28.1289	29.8452	27.8391	33.4433
sp|Q9USP9|YHP4_SCHPO	SPBC902.04	Uncharacterized RNA-binding protein C902.04 OS=Schizosaccharomyces pombe (strain 972 / ATCC 24843) GN=SPBC902.04 PE=1 SV=1	977	2	C	96.7219	117.005	62.8841	75.6178
sp|Q9Y7N0|BDF1_SCHPO	bdf1	SWR1 complex bromodomain subunit bdf1 OS=Schizosaccharomyces pombe (strain 972 / ATCC 24843) GN=bdf1 PE=1 SV=1	390	2	C	130.657	247.225	76.4141	91.9004
sp|O59734|RUXF_SCHPO	smf1	Small nuclear ribonucleoprotein F OS=Schizosaccharomyces pombe (strain 972 / ATCC 24843) GN=smf1 PE=1 SV=1	1537	2	C	74.5308	107.919	113.938	137.19
sp|O59701|CYSK1_SCHPO	cys11	Cysteine synthase 1 OS=Schizosaccharomyces pombe (strain 972 / ATCC 24843) GN=cys11 PE=3 SV=1	142	2	C	61.6911	56.1639	62.6185	75.7847
sp|Q09676|YA03_SCHPO	SPAC5H10.03	Probable phosphatase SPAC5H10.03 OS=Schizosaccharomyces pombe (strain 972 / ATCC 24843) GN=SPAC5H10.03 PE=3 SV=1	9	2	C	37.6542	48.4313	52.5451	63.9382
sp|O13808|GMF1_SCHPO	gmf1	Actin-depolymerizing factor gmf1 OS=Schizosaccharomyces pombe (strain 972 / ATCC 24843) GN=gmf1 PE=3 SV=1	812	2	C	118.875	117.037	126.548	154.033
sp|O74340|DCA13_SCHPO	sof1	Protein sof1 OS=Schizosaccharomyces pombe (strain 972 / ATCC 24843) GN=sof1 PE=3 SV=1	274	2	C	239.271	246.838	162.474	198.355
sp|Q9Y7M4|LSM3_SCHPO	lsm3	Probable U6 snRNA-associated Sm-like protein LSm3 OS=Schizosaccharomyces pombe (strain 972 / ATCC 24843) GN=lsm3 PE=1 SV=2	1168	2	C	51.3422	58.8081	114.513	139.827
sp|O14250|PSA6_SCHPO	SPAC6G10.04c	Probable proteasome subunit alpha type-6 OS=Schizosaccharomyces pombe (strain 972 / ATCC 24843) GN=SPAC6G10.04c PE=3 SV=1	485	2	C	44.162	30.976	106.697	130.552
sp|O13956|TSR1_SCHPO	SPAC23H4.15	Ribosome biogenesis protein tsr1 homolog OS=Schizosaccharomyces pombe (strain 972 / ATCC 24843) GN=SPAC23H4.15 PE=3 SV=1	1386	2	C	107.266	97.3473	120.207	147.135
sp|Q09897|CHR3_SCHPO	chr3	Chitin synthase regulatory factor 3 OS=Schizosaccharomyces pombe (strain 972 / ATCC 24843) GN=chr3 PE=1 SV=1	1360	2	C	59.7521	61.1299	74.0679	90.8637
sp|Q9P6Q5|DUT_SCHPO	SPAC644.05c	Probable deoxyuridine 5'-triphosphate nucleotidohydrolase OS=Schizosaccharomyces pombe (strain 972 / ATCC 24843) GN=SPAC644.05c PE=3 SV=1	1686	2	C	16.2621	27.7016	43.6122	53.9813
sp|O74984|HSP15_SCHPO	SPCC338.06c	Heat shock protein homolog C338.06c OS=Schizosaccharomyces pombe (strain 972 / ATCC 24843) GN=SPCC338.06c PE=3 SV=1	1469	2	C	102.904	147.248	93.8114	116.816
sp|O14301|YE85_SCHPO	SPAC9G1.05	Uncharacterized WD repeat-containing protein C9G1.05 OS=Schizosaccharomyces pombe (strain 972 / ATCC 24843) GN=SPAC9G1.05 PE=3 SV=1	746	2	C	139.339	191.839	83.5493	104.274
sp|Q9P7L1|YOSC_SCHPO	SPBC21C3.12c	Thioredoxin domain-containing protein C21C3.12c OS=Schizosaccharomyces pombe (strain 972 / ATCC 24843) GN=SPBC21C3.12c PE=3 SV=1	1030	2	C	84.6826	90.4935	121.361	152.335
sp|Q9Y7Z3|ACBP_SCHPO	SPBC1539.06	Putative acyl-CoA-binding protein OS=Schizosaccharomyces pombe (strain 972 / ATCC 24843) GN=SPBC1539.06 PE=3 SV=1	902	2	C	65.9064	97.1067	75.086	94.3908
sp|O94723|RM20_SCHPO	mrpl20	54S ribosomal protein L20, mitochondrial OS=Schizosaccharomyces pombe (strain 972 / ATCC 24843) GN=mrpl20 PE=3 SV=1	789	2	C	102.55	137.389	194.182	244.524
sp|O94321|MPR1_SCHPO	mpr1	Multistep phosphorelay regulator 1 OS=Schizosaccharomyces pombe (strain 972 / ATCC 24843) GN=mpr1 PE=1 SV=1	1331	2	C	53.923	42.2671	58.4659	73.8712
sp|O74853|FAP1H_SCHPO	fap1	FKBP12-associated protein 1 homolog OS=Schizosaccharomyces pombe (strain 972 / ATCC 24843) GN=fap1 PE=1 SV=1	196	2	C	54.8454	83.0137	85.9857	109.176
sp|O74803|RHP23_SCHPO	rhp23	UV excision repair protein rhp23 OS=Schizosaccharomyces pombe (strain 972 / ATCC 24843) GN=rhp23 PE=1 SV=1	577	2	C	75.2659	65.4354	88.9565	114.095
sp|O14048|UBX2_SCHPO	ubx2	UBX domain-containing protein 2 OS=Schizosaccharomyces pombe (strain 972 / ATCC 24843) GN=ubx2 PE=1 SV=1	463	2	C	52.5826	86.2357	80.8448	103.886
sp|Q9UTI7|TYSY_SCHPO	SPAC15E1.04	Probable thymidylate synthase OS=Schizosaccharomyces pombe (strain 972 / ATCC 24843) GN=SPAC15E1.04 PE=3 SV=1	707	2	C	47.8435	47.3957	79.4761	102.301
sp|Q10195|YBY6_SCHPO	SPBC11C11.06c	Uncharacterized protein C11C11.06c OS=Schizosaccharomyces pombe (strain 972 / ATCC 24843) GN=SPBC11C11.06c PE=4 SV=1	58	2	C	500.189	369.978	451.488	581.631
sp|Q09796|KA111_SCHPO	kap111	Importin beta-like protein kap111 OS=Schizosaccharomyces pombe (strain 972 / ATCC 24843) GN=kap111 PE=3 SV=1	1486	2	C	37.3446	74.5288	102.518	132.292
sp|O14006|RT09_SCHPO	mrps9	37S ribosomal protein S9, mitochondrial OS=Schizosaccharomyces pombe (strain 972 / ATCC 24843) GN=mrps9 PE=1 SV=2	1441	2	C	88.1435	52.9692	80.5384	104.261
sp|Q9P6N4|PEP5_SCHPO	vps11	E3 ubiquitin-protein ligase pep5 OS=Schizosaccharomyces pombe (strain 972 / ATCC 24843) GN=vps11 PE=3 SV=1	1024	2	C	94.8501	299.939	103.56	134.101
sp|O94462|PUF3_SCHPO	puf3	mRNA-binding protein puf3 OS=Schizosaccharomyces pombe (strain 972 / ATCC 24843) GN=puf3 PE=2 SV=4	1125	2	C	62.6426	41.4398	38.6093	50.0697
sp|O74874|CCR4_SCHPO	ccr4	Glucose-repressible alcohol dehydrogenase transcriptional effector OS=Schizosaccharomyces pombe (strain 972 / ATCC 24843) GN=ccr4 PE=3 SV=1	282	2	C	144.369	160.028	121.347	158.06
sp|Q9USR3|STT4_SCHPO	stt4	Phosphatidylinositol 4-kinase stt4 OS=Schizosaccharomyces pombe (strain 972 / ATCC 24843) GN=stt4 PE=3 SV=1	899	2	C	70.9888	78.8697	92.0794	120.036
sp|P30316|DPOD_SCHPO	pol3	DNA polymerase delta catalytic subunit OS=Schizosaccharomyces pombe (strain 972 / ATCC 24843) GN=pol3 PE=1 SV=2	620	2	C	20.2351	26.9539	58.6965	76.8646
sp|O74733|CFT1_SCHPO	cft1	Protein cft1 OS=Schizosaccharomyces pombe (strain 972 / ATCC 24843) GN=cft1 PE=3 SV=1	1412	2	C	79.7404	97.8252	82.9636	109.184
sp|Q9US06|PAF1_SCHPO	SPAC664.03	RNA polymerase II-associated protein 1 homolog OS=Schizosaccharomyces pombe (strain 972 / ATCC 24843) GN=SPAC664.03 PE=1 SV=2	737	2	C	360.365	514.91	167.44	221.061
sp|Q03392|PCNA_SCHPO	pcn1	Proliferating cell nuclear antigen OS=Schizosaccharomyces pombe (strain 972 / ATCC 24843) GN=pcn1 PE=1 SV=1	133	2	C	115.507	127.251	117.064	154.609
sp|O74778|BTB2_SCHPO	btb2	BTB/POZ domain-containing protein 2 OS=Schizosaccharomyces pombe (strain 972 / ATCC 24843) GN=btb2 PE=1 SV=1	1110	2	C	86.6258	149.398	72.2303	95.4607
sp|O94403|YQFB_SCHPO	SPCC126.11c	Uncharacterized RNA-binding protein C126.11c OS=Schizosaccharomyces pombe (strain 972 / ATCC 24843) GN=SPCC126.11c PE=3 SV=1	1390	2	C	54.7126	23.0734	91.395	120.977
sp|P13681|PP11_SCHPO	dis2	Serine/threonine-protein phosphatase PP1-1 OS=Schizosaccharomyces pombe (strain 972 / ATCC 24843) GN=dis2 PE=1 SV=1	762	2	C	65.9625	80.2048	113.479	152.635
sp|O14085|SEC72_SCHPO	sec72	Translocation protein sec72 OS=Schizosaccharomyces pombe (strain 972 / ATCC 24843) GN=sec72 PE=3 SV=1	2	2	C	115.421	92.102	132.118	178.447
sp|Q9P7B4|YI13_SCHPO	SPAC521.03	Uncharacterized oxidoreductase C521.03 OS=Schizosaccharomyces pombe (strain 972 / ATCC 24843) GN=SPAC521.03 PE=1 SV=1	1581	2	C	86.2057	84.7155	77.5173	104.751
sp|Q92357|CFR1_SCHPO	cfr1	Cell fusion protein cfr1 OS=Schizosaccharomyces pombe (strain 972 / ATCC 24843) GN=cfr1 PE=3 SV=1	1501	2	C	180.098	180.901	64.3789	87.035
sp|Q9P6R6|ATPD_SCHPO	atp16	ATP synthase subunit delta, mitochondrial OS=Schizosaccharomyces pombe (strain 972 / ATCC 24843) GN=atp16 PE=3 SV=2	1394	2	C	93.8309	126.646	86.9827	118.386
sp|O13991|YEG9_SCHPO	SPAC26H5.09c	Uncharacterized oxidoreductase C26H5.09c OS=Schizosaccharomyces pombe (strain 972 / ATCC 24843) GN=SPAC26H5.09c PE=2 SV=3	984	2	C	140.186	167.871	95.9341	133.695
sp|Q9P4X4|SEC17_SCHPO	sec17	Probable vesicular-fusion protein sec17 homolog OS=Schizosaccharomyces pombe (strain 972 / ATCC 24843) GN=sec17 PE=1 SV=1	43	2	C	53.9327	95.8306	48.4146	68.2087
sp|Q9P789|YN8E_SCHPO	SPBP35G2.14	Pumilio domain-containing protein P35G2.14 OS=Schizosaccharomyces pombe (strain 972 / ATCC 24843) GN=SPBP35G2.14 PE=1 SV=2	210	2	C	36.3558	84.2219	63.4967	91.8763
sp|Q9P6K9|DOHH_SCHPO	lia1	Deoxyhypusine hydroxylase OS=Schizosaccharomyces pombe (strain 972 / ATCC 24843) GN=lia1 PE=3 SV=1	189	2	C	32.7812	51.1827	64.8789	94.3158
sp|P33886|WIS1_SCHPO	wis1	Protein kinase wis1 OS=Schizosaccharomyces pombe (strain 972 / ATCC 24843) GN=wis1 PE=1 SV=1	659	2	C	94.5084	237.349	114.252	170.274
sp|Q9C0W7|AP2A_SCHPO	apl3	AP-2 complex subunit alpha OS=Schizosaccharomyces pombe (strain 972 / ATCC 24843) GN=apl3 PE=3 SV=1	892	2	C	518.739	473.947	115.653	194.037
