# Supplementary material for: A conserved RNA degradation complex required for spreading and epigenetic inheritance of heterochromatin
Source: eLife. 2020 Jun 3;9:e54341. doi: 10.7554/eLife.54341 (PMC7269676; doi:10.7554/eLife.54341)
Supplement: Supplementary file 4. — List of proteins identified in purifications of wild-type and Crb3-D198N mutant rixosome complexes using isobaric tandem mass tags (TMT) mass spectrometry. [file elife-54341-supp4.xlsx]

## Sheet: IP4_above1peptide
Protein Id	Gene Symbol	Description	Group ID	Number of peptides	Collapsed?	untagged Crb3	Crb3-TAP	Crb3-D198N-TAP
sp|Q9P370|BUD20_SCHPO	bud20	Zinc finger protein bud20 OS=Schizosaccharomyces pombe (strain 972 / ATCC 24843) GN=bud20 PE=3 SV=1	733	8	C	35.8813	1252.7	491.503
sp|Q9UTJ4|CGR1_SCHPO	cgr1	rRNA-processing protein cgr1 OS=Schizosaccharomyces pombe (strain 972 / ATCC 24843) GN=cgr1 PE=3 SV=1	1493	2	C	81.4901	1668.87	543.389
sp|O74855|NLE1_SCHPO	SPCC18.05c	Ribosome assembly protein 4 OS=Schizosaccharomyces pombe (strain 972 / ATCC 24843) GN=SPCC18.05c PE=3 SV=1	497	12	C	156.075	2829.09	1295.98
sp|O60180|ARX1_SCHPO	arx1	Probable metalloprotease arx1 OS=Schizosaccharomyces pombe (strain 972 / ATCC 24843) GN=arx1 PE=3 SV=1	116	15	C	222.508	3935.16	1658.49
sp|O74809|YGNJ_SCHPO	SPBC2D10.19c	Uncharacterized protein C2D10.19c OS=Schizosaccharomyces pombe (strain 972 / ATCC 24843) GN=SPBC2D10.19c PE=3 SV=1	466	5	C	80.9131	1423.9	704.555
sp|O94718|IPI1_SCHPO	ipi1	Pre-rRNA-processing protein ipi1 OS=Schizosaccharomyces pombe (strain 972 / ATCC 24843) GN=ipi1 PE=3 SV=2	575	15	C	211.668	3389.34	1049.21
sp|O42936|LAS1_SCHPO	las1	Pre-rRNA-processing protein las1 OS=Schizosaccharomyces pombe (strain 972 / ATCC 24843) GN=las1 PE=1 SV=1	400	31	C	399.26	5987.92	2076.29
sp|O94476|IF6_SCHPO	tif6	Eukaryotic translation initiation factor 6 OS=Schizosaccharomyces pombe (strain 972 / ATCC 24843) GN=tif6 PE=3 SV=1	1204	5	C	71.5328	1024.29	468.621
sp|Q9UU96|GRC3_SCHPO	grc3	Polynucleotide 5'-hydroxyl-kinase grc3 OS=Schizosaccharomyces pombe (strain 972 / ATCC 24843) GN=grc3 PE=1 SV=1	716	32	C	648.598	8937.24	3049.94
sp|O14236|NOG2_SCHPO	nog2	Nucleolar GTP-binding protein 2 OS=Schizosaccharomyces pombe (strain 972 / ATCC 24843) GN=nog2 PE=1 SV=1	16	39	C	661.11	8823.16	3923.21
sp|Q10272|IPI3_SCHPO	crb3	Pre-rRNA-processing protein crb3/ipi3 OS=Schizosaccharomyces pombe (strain 972 / ATCC 24843) GN=crb3 PE=1 SV=1	168	91	C	1017.88	13430.1	5379.33
sp|P87243|RIX1_SCHPO	rix1	Pre-rRNA-processing protein rix1 OS=Schizosaccharomyces pombe (strain 972 / ATCC 24843) GN=rix1 PE=1 SV=1	81	81	C	1301.29	16333.6	4966.74
sp|Q9UUI4|YIY9_SCHPO	SPAC22F8.09	Uncharacterized protein C22F8.09 OS=Schizosaccharomyces pombe (strain 972 / ATCC 24843) GN=SPAC22F8.09 PE=1 SV=1	430	25	C	451.06	5511.75	2306.05
sp|O94659|NOG1_SCHPO	nog1	Probable nucleolar GTP-binding protein 1 OS=Schizosaccharomyces pombe (strain 972 / ATCC 24843) GN=nog1 PE=1 SV=2	492	31	C	678.037	7703.4	3159.04
sp|Q96WW3|YNH5_SCHPO	SPBC32H8.05	UPF0642 protein C32H8.05 OS=Schizosaccharomyces pombe (strain 972 / ATCC 24843) GN=SPBC32H8.05 PE=3 SV=1	804	9	C	192.327	1996.22	790.315
sp|Q9UU79|NSA2_SCHPO	nsa2	Ribosome biogenesis protein nsa2 OS=Schizosaccharomyces pombe (strain 972 / ATCC 24843) GN=nsa2 PE=1 SV=1	545	14	C	252.631	2492.26	887.533
sp|P40381|SWI6_SCHPO	swi6	Chromatin-associated protein swi6 OS=Schizosaccharomyces pombe (strain 972 / ATCC 24843) GN=swi6 PE=1 SV=1	920	4	C	94.0483	892.702	173.502
sp|Q10342|SDA1_SCHPO	sda1	Protein sda1 OS=Schizosaccharomyces pombe (strain 972 / ATCC 24843) GN=sda1 PE=3 SV=2	237	29	C	686.539	6262.8	3091.99
sp|Q10353|RLP24_SCHPO	rlp24	Ribosome biogenesis protein rlp24 OS=Schizosaccharomyces pombe (strain 972 / ATCC 24843) GN=rlp24 PE=3 SV=1	484	13	C	316.7	2852.42	618.322
sp|O60164|PESC_SCHPO	ppp1	Pescadillo homolog OS=Schizosaccharomyces pombe (strain 972 / ATCC 24843) GN=ppp1 PE=3 SV=1	719	30	C	843.624	7568.7	3007.74
sp|O60058|AFG2_SCHPO	afg2	ATPase family gene 2 protein OS=Schizosaccharomyces pombe (strain 972 / ATCC 24843) GN=afg2 PE=3 SV=1	284	21	C	785.502	6842.46	1469.57
sp|P05933|CALM_SCHPO	cam1	Calmodulin OS=Schizosaccharomyces pombe (strain 972 / ATCC 24843) GN=cam1 PE=1 SV=1	689	42	C	497.042	4320.22	1522.88
sp|Q9USZ6|MRT4_SCHPO	mrt4	Ribosome assembly factor mrt4 OS=Schizosaccharomyces pombe (strain 972 / ATCC 24843) GN=mrt4 PE=3 SV=1	229	11	C	264.36	2146.6	1118.02
sp|O59678|RRS1_SCHPO	SPBC29A3.16	Ribosome biogenesis regulatory protein homolog OS=Schizosaccharomyces pombe (strain 972 / ATCC 24843) GN=SPBC29A3.16 PE=1 SV=1	782	4	C	108.149	841.87	370.353
sp|O74791|GRN1_SCHPO	grn1	GTPase grn1 OS=Schizosaccharomyces pombe (strain 972 / ATCC 24843) GN=grn1 PE=1 SV=1	508	31	C	759.92	5714.19	2547.83
sp|P17937|RL7A_SCHPO	rpl7a	60S ribosomal protein L7-A OS=Schizosaccharomyces pombe (strain 972 / ATCC 24843) GN=rpl7a PE=3 SV=1	166	11	C	460.667	2753.67	1083.21
sp|O74978|YQL5_SCHPO	SPCC1827.05c	Uncharacterized RNA-binding protein C1827.05c OS=Schizosaccharomyces pombe (strain 972 / ATCC 24843) GN=SPCC1827.05c PE=3 SV=1	986	13	C	561.622	3289.71	1005.36
sp|Q9UT32|RL1DB_SCHPO	SPAC8F11.04	Putative ribosome biogenesis protein C8F11.04 OS=Schizosaccharomyces pombe (strain 972 / ATCC 24843) GN=SPAC8F11.04 PE=3 SV=1	762	17	C	960.401	5518.93	2034.47
sp|O94248|MDN1_SCHPO	mdn1	Midasin OS=Schizosaccharomyces pombe (strain 972 / ATCC 24843) GN=mdn1 PE=1 SV=1	243	60	C	1592.5	8953.27	4909.54
sp|Q9UUG1|RPF2_SCHPO	SPAC926.08c	Ribosome production factor 2 homolog OS=Schizosaccharomyces pombe (strain 972 / ATCC 24843) GN=SPAC926.08c PE=1 SV=1	911	21	C	607.202	2805.9	1185.57
sp|O14232|MTR4_SCHPO	mtr4	ATP-dependent RNA helicase mtr4 OS=Schizosaccharomyces pombe (strain 972 / ATCC 24843) GN=mtr4 PE=1 SV=1	765	20	C	780.06	3482.96	1352.92
sp|Q9UUA0|ECM1_SCHPO	SPCC23B6.02c	Shuttling pre-60S factor C23B6.02c OS=Schizosaccharomyces pombe (strain 972 / ATCC 24843) GN=SPCC23B6.02c PE=3 SV=2	1561	2	C	69.5185	271.311	126.095
sp|Q10367|GLO3_SCHPO	glo3	ADP-ribosylation factor GTPase-activating protein glo3 OS=Schizosaccharomyces pombe (strain 972 / ATCC 24843) GN=glo3 PE=3 SV=2	432	5	C	311.398	1099.05	566.496
sp|Q9P3T7|ODC_SCHPO	SPAC328.09	Probable mitochondrial 2-oxodicarboxylate carrier OS=Schizosaccharomyces pombe (strain 972 / ATCC 24843) GN=SPAC328.09 PE=3 SV=1	923	2	C	113.389	397.755	185.568
sp|O60079|UBP12_SCHPO	ubp12	Probable ubiquitin carboxyl-terminal hydrolase 12 OS=Schizosaccharomyces pombe (strain 972 / ATCC 24843) GN=ubp12 PE=1 SV=1	676	4	C	331.78	1000.33	430.006
sp|O74483|LSM8_SCHPO	lsm8	U6 snRNA-associated Sm-like protein LSm8 OS=Schizosaccharomyces pombe (strain 972 / ATCC 24843) GN=lsm8 PE=3 SV=1	1698	2	C	123.11	361.668	200.61
sp|O75000|RL12_SCHPO	rpl1201	60S ribosomal protein L12 OS=Schizosaccharomyces pombe (strain 972 / ATCC 24843) GN=rpl1201 PE=1 SV=1	582	10	C	576.945	1610.27	626.759
sp|Q09817|NMD3_SCHPO	nmd3	60S ribosomal export protein nmd3 OS=Schizosaccharomyces pombe (strain 972 / ATCC 24843) GN=nmd3 PE=3 SV=1	684	5	C	250.336	661.213	487.137
sp|Q9USX4|RL33A_SCHPO	rpl33a	60S ribosomal protein L33-A OS=Schizosaccharomyces pombe (strain 972 / ATCC 24843) GN=rpl33a PE=3 SV=2	916	8	C	787.922	2077.43	1021.15
sp|P87058|LAH1_SCHPO	sla1	La protein homolog OS=Schizosaccharomyces pombe (strain 972 / ATCC 24843) GN=sla1 PE=1 SV=1	654	13	C	994.71	2508.66	1137.37
sp|O74538|RL27B_SCHPO	rpl27b	60S ribosomal protein L27-B OS=Schizosaccharomyces pombe (strain 972 / ATCC 24843) GN=rpl27b PE=3 SV=1	1202	7	C	282.082	707.897	170.435
sp|O14178|RM40_SCHPO	mrpl40	54S ribosomal protein L40, mitochondrial OS=Schizosaccharomyces pombe (strain 972 / ATCC 24843) GN=mrpl40 PE=3 SV=1	1369	2	C	142.763	357.891	211.34
sp|P05767|RL39_SCHPO	rpl39	60S ribosomal protein L39 OS=Schizosaccharomyces pombe (strain 972 / ATCC 24843) GN=rpl39 PE=3 SV=3	1550	10	C	873.602	2039.94	1017.94
sp|O59794|RL17B_SCHPO	rpl17b	60S ribosomal protein L17-B OS=Schizosaccharomyces pombe (strain 972 / ATCC 24843) GN=rpl17b PE=3 SV=1	191	5	C	429.577	1001.95	517.71
sp|P36594|RPB1_SCHPO	rpb1	DNA-directed RNA polymerase II subunit rpb1 OS=Schizosaccharomyces pombe (strain 972 / ATCC 24843) GN=rpb1 PE=1 SV=1	482	3	C	138.339	321.344	220.26
sp|O74349|LTN1_SCHPO	rkr1	E3 ubiquitin-protein ligase listerin OS=Schizosaccharomyces pombe (strain 972 / ATCC 24843) GN=rkr1 PE=3 SV=1	592	3	C	72.9349	157.378	144.808
sp|P79071|RL6_SCHPO	rpl6	60S ribosomal protein L6 OS=Schizosaccharomyces pombe (strain 972 / ATCC 24843) GN=rpl6 PE=1 SV=2	657	15	C	1687.94	3632.22	1890.98
sp|O42832|SPB1_SCHPO	spb1	AdoMet-dependent rRNA methyltransferase spb1 OS=Schizosaccharomyces pombe (strain 972 / ATCC 24843) GN=spb1 PE=1 SV=2	103	7	C	378.688	798.172	458.517
sp|Q10330|RL25A_SCHPO	rpl25a	60S ribosomal protein L25-A OS=Schizosaccharomyces pombe (strain 972 / ATCC 24843) GN=rpl25a PE=1 SV=1	1277	8	C	547.66	1135.69	428.896
sp|O13986|YEG4_SCHPO	SPAC26H5.04	Uncharacterized protein C26H5.04 OS=Schizosaccharomyces pombe (strain 972 / ATCC 24843) GN=SPAC26H5.04 PE=4 SV=3	1307	2	C	94.8297	196.367	177.504
sp|O59811|REI1_SCHPO	SPCC550.15c	Cytoplasmic 60S subunit biogenesis factor SPCC550.15c OS=Schizosaccharomyces pombe (strain 972 / ATCC 24843) GN=SPCC550.15c PE=1 SV=1	1067	3	C	85.7824	173.809	212.577
sp|P30316|DPOD_SCHPO	pol3	DNA polymerase delta catalytic subunit OS=Schizosaccharomyces pombe (strain 972 / ATCC 24843) GN=pol3 PE=1 SV=2	620	2	C	26.3079	51.8004	44.1652
sp|O42867|RL23_SCHPO	rpl23a	60S ribosomal protein L23 OS=Schizosaccharomyces pombe (strain 972 / ATCC 24843) GN=rpl23a PE=3 SV=1	1152	5	C	273.457	528.43	382.586
sp|P05732|RL20_SCHPO	rpl20a	60S ribosomal protein L20 OS=Schizosaccharomyces pombe (strain 972 / ATCC 24843) GN=rpl20a PE=1 SV=3	546	13	C	1441.65	2780.42	1582.69
sp|O14339|RL17A_SCHPO	rpl17a	60S ribosomal protein L17-A OS=Schizosaccharomyces pombe (strain 972 / ATCC 24843) GN=rpl17a PE=3 SV=1	191	17	C	1550.87	2958.45	1408.65
sp|O60096|RT35_SCHPO	bot1	37S ribosomal protein S35, mitochondrial OS=Schizosaccharomyces pombe (strain 972 / ATCC 24843) GN=bot1 PE=2 SV=1	1424	3	C	107.839	204.281	149.979
sp|P25457|RL7B_SCHPO	rpl7b	60S ribosomal protein L7-B OS=Schizosaccharomyces pombe (strain 972 / ATCC 24843) GN=rpl7b PE=3 SV=1	128	15	C	1829.51	3442.54	1394.19
sp|O74836|RL1B_SCHPO	rpl1b	60S ribosomal protein L1-B OS=Schizosaccharomyces pombe (strain 972 / ATCC 24843) GN=rpl1b PE=1 SV=1	1128	5	C	261.096	487.878	281.355
sp|O14006|RT09_SCHPO	mrps9	37S ribosomal protein S9, mitochondrial OS=Schizosaccharomyces pombe (strain 972 / ATCC 24843) GN=mrps9 PE=1 SV=2	1441	2	C	67.5603	124.178	110.693
sp|Q9UUC1|RL21A_SCHPO	rpl21a	60S ribosomal protein L21-A OS=Schizosaccharomyces pombe (strain 972 / ATCC 24843) GN=rpl21a PE=3 SV=1	279	9	C	876.387	1602.24	724.545
sp|O74874|CCR4_SCHPO	ccr4	Glucose-repressible alcohol dehydrogenase transcriptional effector OS=Schizosaccharomyces pombe (strain 972 / ATCC 24843) GN=ccr4 PE=3 SV=1	282	2	C	163.616	296.913	78.0362
sp|O94401|YQF8_SCHPO	SPCC126.08c	L-type lectin-like domain-containing protein C126.08c OS=Schizosaccharomyces pombe (strain 972 / ATCC 24843) GN=SPCC126.08c PE=3 SV=1	346	3	C	78.0723	141.135	133.919
sp|O60143|RL7C_SCHPO	rpl7c	60S ribosomal protein L7-C OS=Schizosaccharomyces pombe (strain 972 / ATCC 24843) GN=rpl7c PE=1 SV=1	128	14	C	1689.42	3051.8	2167.54
sp|Q9USG6|RL33B_SCHPO	rpl33b	60S ribosomal protein L33-B OS=Schizosaccharomyces pombe (strain 972 / ATCC 24843) GN=rpl33b PE=1 SV=1	916	5	C	546.424	979.382	714.594
sp|O74391|RL25B_SCHPO	rpl25b	60S ribosomal protein L25-B OS=Schizosaccharomyces pombe (strain 972 / ATCC 24843) GN=rpl25b PE=3 SV=1	1277	3	C	323.229	567.175	263.786
sp|O94436|TAF14_SCHPO	tfg3	Transcription initiation factor TFIID subunit 14 OS=Schizosaccharomyces pombe (strain 972 / ATCC 24843) GN=tfg3 PE=1 SV=1	401	4	C	205.214	358.354	317.287
sp|P09988|H31_SCHPO	hht1	Histone H3.1/H3.2 OS=Schizosaccharomyces pombe (strain 972 / ATCC 24843) GN=hht1 PE=1 SV=2	56	4	C	525.619	915.088	418.95
sp|P57728|RL28B_SCHPO	rpl28b	60S ribosomal protein L28-B OS=Schizosaccharomyces pombe (strain 972 / ATCC 24843) GN=rpl28b PE=1 SV=1	240	3	C	122.66	212.756	128
sp|P40372|RL3A_SCHPO	rpl3a	60S ribosomal protein L3-A OS=Schizosaccharomyces pombe (strain 972 / ATCC 24843) GN=rpl3a PE=1 SV=2	252	39	C	3176.85	5506.63	3032.26
sp|O74904|RL35_SCHPO	rpl35	60S ribosomal protein L35 OS=Schizosaccharomyces pombe (strain 972 / ATCC 24843) GN=rpl35 PE=1 SV=1	406	9	C	1178.98	2033.9	294.455
sp|Q10232|RL9A_SCHPO	rpl9a	60S ribosomal protein L9-A OS=Schizosaccharomyces pombe (strain 972 / ATCC 24843) GN=rpl9a PE=3 SV=1	663	6	C	733.594	1264.86	856.769
sp|O42991|RL16B_SCHPO	rpl16b	60S ribosomal protein L16-B OS=Schizosaccharomyces pombe (strain 972 / ATCC 24843) GN=rpl16b PE=1 SV=1	895	3	C	250.593	429.971	183.614
sp|Q9HFE5|AP1M1_SCHPO	apm1	AP-1 complex subunit mu-1 OS=Schizosaccharomyces pombe (strain 972 / ATCC 24843) GN=apm1 PE=1 SV=1	1075	2	C	37.8053	64.57	55.4107
sp|O14241|ARPC2_SCHPO	arc2	Actin-related protein 2/3 complex subunit 2 OS=Schizosaccharomyces pombe (strain 972 / ATCC 24843) GN=arc2 PE=1 SV=1	790	4	C	159.89	272.671	213.884
sp|Q12381|PRP1_SCHPO	prp1	Pre-mRNA-splicing factor prp1 OS=Schizosaccharomyces pombe (strain 972 / ATCC 24843) GN=prp1 PE=1 SV=1	128	2	C	170.34	290.458	164.29
sp|O14340|YB35_SCHPO	SPBC2F12.05c	Oxysterol-binding protein homolog C2F12.05c OS=Schizosaccharomyces pombe (strain 972 / ATCC 24843) GN=SPBC2F12.05c PE=1 SV=2	894	4	C	197.678	335.442	271.728
sp|P05733|RL37B_SCHPO	rpl37b	60S ribosomal protein L37-B OS=Schizosaccharomyces pombe (strain 972 / ATCC 24843) GN=rpl37b PE=1 SV=4	1236	6	C	843.899	1429.84	987.799
sp|Q10157|RL11_SCHPO	rpl11a	60S ribosomal protein L11 OS=Schizosaccharomyces pombe (strain 972 / ATCC 24843) GN=rpl11a PE=1 SV=1	139	12	C	780.553	1316.28	952.867
sp|O94686|RL43B_SCHPO	rpl43b	60S ribosomal protein L43-B OS=Schizosaccharomyces pombe (strain 972 / ATCC 24843) GN=rpl43b PE=3 SV=1	1281	4	C	494.602	826.377	234.415
sp|O42958|PAT1_SCHPO	SPBC19G7.10c	DNA topoisomerase 2-associated protein pat1 OS=Schizosaccharomyces pombe (strain 972 / ATCC 24843) GN=SPBC19G7.10c PE=3 SV=2	416	13	C	1151.96	1919.76	1227.29
sp|O14180|YDS4_SCHPO	SPAC4F8.04	Brix domain-containing protein C4F8.04 OS=Schizosaccharomyces pombe (strain 972 / ATCC 24843) GN=SPAC4F8.04 PE=3 SV=1	645	3	C	157.65	261.102	168.631
sp|P36585|RL28A_SCHPO	rpl28a	60S ribosomal protein L28-A OS=Schizosaccharomyces pombe (strain 972 / ATCC 24843) GN=rpl28a PE=3 SV=3	240	9	C	1092.57	1809.12	1072.4
sp|P05734|RL19A_SCHPO	rpl19a	60S ribosomal protein L19-A OS=Schizosaccharomyces pombe (strain 972 / ATCC 24843) GN=rpl19a PE=1 SV=3	371	17	C	1462.44	2419.78	1472.48
sp|Q9Y7T7|PRP28_SCHPO	prp28	Pre-mRNA-splicing ATP-dependent RNA helicase prp28 OS=Schizosaccharomyces pombe (strain 972 / ATCC 24843) GN=prp28 PE=3 SV=1	914	2	C	59.7262	97.7888	88.7903
sp|P41391|RNA1_SCHPO	rna1	Ran GTPase-activating protein 1 OS=Schizosaccharomyces pombe (strain 972 / ATCC 24843) GN=rna1 PE=1 SV=1	389	3	C	66.5675	108.844	112.715
sp|Q9URX6|RL31_SCHPO	rpl31	60S ribosomal protein L31 OS=Schizosaccharomyces pombe (strain 972 / ATCC 24843) GN=rpl31 PE=3 SV=1	313	12	C	1024.54	1670.69	1134.8
sp|Q9UTK0|NOB1_SCHPO	nob1	20S-pre-rRNA D-site endonuclease nob1 OS=Schizosaccharomyces pombe (strain 972 / ATCC 24843) GN=nob1 PE=3 SV=1	130	2	C	68.8487	111.81	92.6553
sp|P07799|TOP1_SCHPO	top1	DNA topoisomerase 1 OS=Schizosaccharomyces pombe (strain 972 / ATCC 24843) GN=top1 PE=1 SV=2	919	2	C	115.162	185.595	177.912
sp|O94238|RL14_SCHPO	rpl14	60S ribosomal protein L14 OS=Schizosaccharomyces pombe (strain 972 / ATCC 24843) GN=rpl14 PE=2 SV=1	1019	7	C	636.793	1016.92	859.894
sp|P46595|UBC4_SCHPO	ubc4	Ubiquitin-conjugating enzyme E2 4 OS=Schizosaccharomyces pombe (strain 972 / ATCC 24843) GN=ubc4 PE=1 SV=1	806	3	C	259.942	411.49	453.544
sp|P21565|SRP54_SCHPO	srp54	Signal recognition particle 54 kDa protein homolog OS=Schizosaccharomyces pombe (strain 972 / ATCC 24843) GN=srp54 PE=1 SV=1	567	6	C	343.922	542.73	412.173
sp|P04913|H2B1_SCHPO	htb1	Histone H2B-alpha OS=Schizosaccharomyces pombe (strain 972 / ATCC 24843) GN=htb1 PE=1 SV=3	1249	4	C	622.384	981.251	543.362
sp|Q9US13|RPN9_SCHPO	rpn9	Probable 26S proteasome regulatory subunit rpn9 OS=Schizosaccharomyces pombe (strain 972 / ATCC 24843) GN=rpn9 PE=3 SV=1	120	4	C	125.168	194.449	244.139
sp|Q9UTI8|RL44_SCHPO	rpl42	60S ribosomal protein L42 OS=Schizosaccharomyces pombe (strain 972 / ATCC 24843) GN=rpl42 PE=1 SV=3	1251	2	C	291.94	449.68	256.043
sp|O94508|CWF11_SCHPO	cwf11	Pre-mRNA-splicing factor cwf11 OS=Schizosaccharomyces pombe (strain 972 / ATCC 24843) GN=cwf11 PE=1 SV=1	772	2	C	91.2652	140.262	80.2615
sp|O14388|RL27A_SCHPO	rpl27a	60S ribosomal protein L27-A OS=Schizosaccharomyces pombe (strain 972 / ATCC 24843) GN=rpl27a PE=2 SV=2	1202	12	C	1556.01	2368.63	1084.32
sp|O94403|YQFB_SCHPO	SPCC126.11c	Uncharacterized RNA-binding protein C126.11c OS=Schizosaccharomyces pombe (strain 972 / ATCC 24843) GN=SPCC126.11c PE=3 SV=1	1390	2	C	69.5812	105.451	65.918
sp|Q10192|RL18A_SCHPO	rpl18a	60S ribosomal protein L18-A OS=Schizosaccharomyces pombe (strain 972 / ATCC 24843) GN=rpl18a PE=1 SV=1	239	11	C	709.615	1074.93	698.803
sp|O94383|SMC1_SCHPO	psm1	Structural maintenance of chromosomes protein 1 OS=Schizosaccharomyces pombe (strain 972 / ATCC 24843) GN=psm1 PE=1 SV=2	884	3	C	91.6693	138.68	122.39
sp|O94723|RM20_SCHPO	mrpl20	54S ribosomal protein L20, mitochondrial OS=Schizosaccharomyces pombe (strain 972 / ATCC 24843) GN=mrpl20 PE=3 SV=1	789	2	C	140.751	212.361	164.225
sp|P35679|RL4A_SCHPO	rpl4a	60S ribosomal protein L4-A OS=Schizosaccharomyces pombe (strain 972 / ATCC 24843) GN=rpl4a PE=1 SV=2	242	33	C	4340.42	6540.77	3959.88
sp|O14250|PSA6_SCHPO	SPAC6G10.04c	Probable proteasome subunit alpha type-6 OS=Schizosaccharomyces pombe (strain 972 / ATCC 24843) GN=SPAC6G10.04c PE=3 SV=1	485	2	C	48.7059	73.2132	94.6153
sp|O14063|IMA1_SCHPO	cut15	Importin subunit alpha-1 OS=Schizosaccharomyces pombe (strain 972 / ATCC 24843) GN=cut15 PE=1 SV=1	1050	6	C	294.247	438.728	355.235
sp|P40235|HHP1_SCHPO	hhp1	Casein kinase I homolog hhp1 OS=Schizosaccharomyces pombe (strain 972 / ATCC 24843) GN=hhp1 PE=2 SV=1	712	4	C	215.555	321.269	185.029
sp|Q10071|STE24_SCHPO	SPAC3H1.05	Probable CAAX prenyl protease 1 OS=Schizosaccharomyces pombe (strain 972 / ATCC 24843) GN=SPAC3H1.05 PE=3 SV=1	973	2	C	47.8213	70.7142	90.3734
sp|O60169|YHC5_SCHPO	SPBC19F8.05	Uncharacterized protein C19F8.05 OS=Schizosaccharomyces pombe (strain 972 / ATCC 24843) GN=SPBC19F8.05 PE=4 SV=1	864	3	C	78.7347	116.355	91.2878
sp|Q10195|YBY6_SCHPO	SPBC11C11.06c	Uncharacterized protein C11C11.06c OS=Schizosaccharomyces pombe (strain 972 / ATCC 24843) GN=SPBC11C11.06c PE=4 SV=1	58	2	C	237.069	350.052	724.906
sp|Q09127|RL10A_SCHPO	rpl10a	60S ribosomal protein L10-A OS=Schizosaccharomyces pombe (strain 972 / ATCC 24843) GN=rpl10a PE=2 SV=2	283	10	C	1014.7	1497.85	696.87
sp|O74499|LSM7_SCHPO	lsm7	U6 snRNA-associated Sm-like protein LSm7 OS=Schizosaccharomyces pombe (strain 972 / ATCC 24843) GN=lsm7 PE=1 SV=1	1238	3	C	196.204	288.495	177.723
sp|Q8TFH1|RL18B_SCHPO	rpl18b	60S ribosomal protein L18-B OS=Schizosaccharomyces pombe (strain 972 / ATCC 24843) GN=rpl18b PE=1 SV=1	239	4	C	137.341	201.468	98.2214
sp|O74399|ERB1_SCHPO	erb1	Ribosome biogenesis protein erb1 OS=Schizosaccharomyces pombe (strain 972 / ATCC 24843) GN=erb1 PE=1 SV=2	449	13	C	1015.37	1483.93	1018.47
sp|P08093|RL2_SCHPO	rpl2a	60S ribosomal protein L2 OS=Schizosaccharomyces pombe (strain 972 / ATCC 24843) GN=rpl2a PE=3 SV=2	1247	17	C	2324.73	3376.85	2002.48
sp|Q09897|CHR3_SCHPO	chr3	Chitin synthase regulatory factor 3 OS=Schizosaccharomyces pombe (strain 972 / ATCC 24843) GN=chr3 PE=1 SV=1	1360	2	C	84.2069	122.214	120.156
sp|P33277|GAP1_SCHPO	gap1	GTPase-activating protein OS=Schizosaccharomyces pombe (strain 972 / ATCC 24843) GN=gap1 PE=3 SV=1	299	2	C	55.3283	80.0421	94.605
sp|Q09705|RT24_SCHPO	rsm24	37S ribosomal protein S24, mitochondrial OS=Schizosaccharomyces pombe (strain 972 / ATCC 24843) GN=rsm24 PE=3 SV=1	1319	6	C	326.486	471.666	372.867
sp|O94415|SUCB_SCHPO	SPCC1620.08	Probable succinyl-CoA ligase [GDP-forming] subunit beta, mitochondrial OS=Schizosaccharomyces pombe (strain 972 / ATCC 24843) GN=SPCC1620.08 PE=3 SV=1	721	5	C	224.109	322.124	396.404
sp|O60144|RS16_SCHPO	rps16a	40S ribosomal protein S16 OS=Schizosaccharomyces pombe (strain 972 / ATCC 24843) GN=rps16a PE=2 SV=1	336	6	C	513.56	730.927	532.002
sp|P52808|RL30A_SCHPO	rpl30a	60S ribosomal protein L30-1 OS=Schizosaccharomyces pombe (strain 972 / ATCC 24843) GN=rpl30a PE=3 SV=2	1370	7	C	662.26	938.578	548.65
sp|O94698|NSA1_SCHPO	nsa1	Ribosome biogenesis protein nsa1 OS=Schizosaccharomyces pombe (strain 972 / ATCC 24843) GN=nsa1 PE=3 SV=1	386	7	C	428.924	607.854	475.124
sp|O14069|RL28E_SCHPO	rpl28e	Probable 60S ribosomal protein L28e OS=Schizosaccharomyces pombe (strain 972 / ATCC 24843) GN=rpl28e PE=1 SV=1	496	14	C	967.534	1371.06	551.934
sp|Q9UT02|SEC7A_SCHPO	sec71	Protein transport protein sec71 OS=Schizosaccharomyces pombe (strain 972 / ATCC 24843) GN=sec71 PE=1 SV=1	1461	2	C	118.386	167.674	175.284
sp|O42848|RL16A_SCHPO	rpl16a	60S ribosomal protein L16-A OS=Schizosaccharomyces pombe (strain 972 / ATCC 24843) GN=rpl16a PE=1 SV=1	895	10	C	1340.11	1880.29	1101.37
sp|Q9USR7|RL38A_SCHPO	rpl38a	60S ribosomal protein L38-1 OS=Schizosaccharomyces pombe (strain 972 / ATCC 24843) GN=rpl38a PE=3 SV=1	1407	3	C	315.721	442.233	275.957
sp|Q96WV9|CDK9_SCHPO	cdk9	Probable cyclin-dependent kinase 9 OS=Schizosaccharomyces pombe (strain 972 / ATCC 24843) GN=cdk9 PE=1 SV=1	1220	4	C	314.463	440.265	302.417
sp|Q9P784|RL4B_SCHPO	rpl4b	60S ribosomal protein L4-B OS=Schizosaccharomyces pombe (strain 972 / ATCC 24843) GN=rpl4b PE=3 SV=1	242	5	C	424.83	592.45	291.295
sp|P41004|SMC4_SCHPO	cut3	Structural maintenance of chromosomes protein 4 OS=Schizosaccharomyces pombe (strain 972 / ATCC 24843) GN=cut3 PE=1 SV=2	810	5	C	389.41	542.802	584.872
sp|Q92365|RL36A_SCHPO	rpl36a	60S ribosomal protein L36-A OS=Schizosaccharomyces pombe (strain 972 / ATCC 24843) GN=rpl36a PE=3 SV=2	1053	9	C	465.89	649.382	459.23
sp|O42935|RL32B_SCHPO	rpl32b	60S ribosomal protein L32-B OS=Schizosaccharomyces pombe (strain 972 / ATCC 24843) GN=rpl32b PE=3 SV=1	1185	13	C	1306.95	1815.7	918.279
sp|O94267|SPT16_SCHPO	spt16	FACT complex subunit spt16 OS=Schizosaccharomyces pombe (strain 972 / ATCC 24843) GN=spt16 PE=1 SV=1	935	9	C	652.959	905	599.515
sp|O74767|COPE_SCHPO	sec28	Probable coatomer subunit epsilon OS=Schizosaccharomyces pombe (strain 972 / ATCC 24843) GN=sec28 PE=1 SV=1	483	7	C	248.596	344.012	373.595
sp|Q11120|OFD1_SCHPO	ofd1	Prolyl 3,4-dihydroxylase ofd1 OS=Schizosaccharomyces pombe (strain 972 / ATCC 24843) GN=ofd1 PE=1 SV=1	626	3	C	77.4566	107.039	131.76
sp|O74895|RL15A_SCHPO	rpl15a	60S ribosomal protein L15-A OS=Schizosaccharomyces pombe (strain 972 / ATCC 24843) GN=rpl15a PE=3 SV=1	1092	13	C	1402.98	1937.86	1187.76
sp|Q10422|YDC1_SCHPO	SPAC25G10.01	Uncharacterized RNA-binding protein C25G10.01 OS=Schizosaccharomyces pombe (strain 972 / ATCC 24843) GN=SPAC25G10.01 PE=1 SV=1	1102	2	C	143.114	197.216	145.835
sp|O42854|YFHH_SCHPO	SPAC23A1.17	SH3 domain-containing protein C23A1.17 OS=Schizosaccharomyces pombe (strain 972 / ATCC 24843) GN=SPAC23A1.17 PE=1 SV=1	701	4	C	220.302	303.151	239.976
sp|O14463|TRX1_SCHPO	trx1	Thioredoxin-1 OS=Schizosaccharomyces pombe (strain 972 / ATCC 24843) GN=trx1 PE=3 SV=3	1088	7	C	593.837	815.048	1217.42
sp|Q9P777|HISX_SCHPO	his2	Histidinol dehydrogenase OS=Schizosaccharomyces pombe (strain 972 / ATCC 24843) GN=his2 PE=3 SV=1	5	3	C	79.2004	108.563	188.005
sp|O60184|CYC8_SCHPO	ssn6	General transcriptional corepressor ssn6 OS=Schizosaccharomyces pombe (strain 972 / ATCC 24843) GN=ssn6 PE=1 SV=1	606	3	C	59.214	81.0975	109.411
sp|O74175|RL13_SCHPO	rpl13	60S ribosomal protein L13 OS=Schizosaccharomyces pombe (strain 972 / ATCC 24843) GN=rpl13 PE=1 SV=1	1164	19	C	2001.85	2740.54	1693.58
sp|Q92357|CFR1_SCHPO	cfr1	Cell fusion protein cfr1 OS=Schizosaccharomyces pombe (strain 972 / ATCC 24843) GN=cfr1 PE=3 SV=1	1501	2	C	24.0901	32.8154	59.3135
sp|O14089|IMB2_SCHPO	kap104	Importin subunit beta-2 OS=Schizosaccharomyces pombe (strain 972 / ATCC 24843) GN=kap104 PE=3 SV=1	529	3	C	134.877	183.479	233.416
sp|Q10432|CCQ1_SCHPO	ccq1	Coiled-coil quantitatively-enriched protein 1 OS=Schizosaccharomyces pombe (strain 972 / ATCC 24843) GN=ccq1 PE=1 SV=1	904	2	C	49.915	67.8755	76.2873
sp|Q9Y7Z5|TTS1_SCHPO	tts1	Tetra-spanning protein 1 OS=Schizosaccharomyces pombe (strain 972 / ATCC 24843) GN=tts1 PE=1 SV=1	1096	2	C	27.3465	37.1601	43.5255
sp|O13960|ECM33_SCHPO	ecm33	Cell wall protein ecm33 OS=Schizosaccharomyces pombe (strain 972 / ATCC 24843) GN=ecm33 PE=1 SV=2	1158	5	C	262.779	356.89	427.357
sp|O94529|POB3_SCHPO	pob3	FACT complex subunit pob3 OS=Schizosaccharomyces pombe (strain 972 / ATCC 24843) GN=pob3 PE=3 SV=1	531	10	C	637.974	865.081	725.441
sp|O14470|SSR2_SCHPO	ssr2	SWI/SNF and RSC complexes subunit ssr2 OS=Schizosaccharomyces pombe (strain 972 / ATCC 24843) GN=ssr2 PE=1 SV=3	1422	2	C	71.5493	96.9984	87.066
sp|O13614|RS10B_SCHPO	rps10b	40S ribosomal protein S10-B OS=Schizosaccharomyces pombe (strain 972 / ATCC 24843) GN=rps10b PE=3 SV=1	311	5	C	300.936	405.044	305.27
sp|Q9P3U7|GHT8_SCHPO	ght8	Probable high-affinity hexose transporter ght8, mitochondrial OS=Schizosaccharomyces pombe (strain 972 / ATCC 24843) GN=ght8 PE=1 SV=1	345	3	C	491.457	660.852	614.874
sp|Q9P7J6|RS17B_SCHPO	rps17b	40S ribosomal protein S17-B OS=Schizosaccharomyces pombe (strain 972 / ATCC 24843) GN=rps17b PE=1 SV=1	370	12	C	1534.72	2062.68	1117.16
sp|O14363|RL1A_SCHPO	rpl1a	60S ribosomal protein L1-A OS=Schizosaccharomyces pombe (strain 972 / ATCC 24843) GN=rpl1a PE=1 SV=1	1128	15	C	1626.66	2185.41	1288.9
sp|O60163|AK_SCHPO	SPBC19F5.04	Probable aspartokinase OS=Schizosaccharomyces pombe (strain 972 / ATCC 24843) GN=SPBC19F5.04 PE=1 SV=1	797	9	C	599.342	802.583	645.847
sp|P42657|RAD25_SCHPO	rad25	DNA damage checkpoint protein rad25 OS=Schizosaccharomyces pombe (strain 972 / ATCC 24843) GN=rad25 PE=1 SV=1	66	9	C	475.512	634.115	1165.24
sp|O59855|HSP72_SCHPO	ssa2	Probable heat shock protein ssa2 OS=Schizosaccharomyces pombe (strain 972 / ATCC 24843) GN=ssa2 PE=1 SV=3	343	43	C	3166.51	4217.47	10897
sp|O42984|RS17A_SCHPO	rps17a	40S ribosomal protein S17-A OS=Schizosaccharomyces pombe (strain 972 / ATCC 24843) GN=rps17a PE=3 SV=1	370	8	C	670.059	892.02	542.935
sp|Q9UTT1|UBP21_SCHPO	ubp21	Ubiquitin carboxyl-terminal hydrolase 21 OS=Schizosaccharomyces pombe (strain 972 / ATCC 24843) GN=ubp21 PE=3 SV=2	1057	4	C	79.1153	105.003	143.912
sp|Q9Y7U6|RGF1_SCHPO	rgf1	Rho1 guanine nucleotide exchange factor 1 OS=Schizosaccharomyces pombe (strain 972 / ATCC 24843) GN=rgf1 PE=1 SV=1	1447	2	C	165.428	219.347	143.446
sp|Q9P7H8|ECM29_SCHPO	ecm29	Proteasome component ecm29 OS=Schizosaccharomyces pombe (strain 972 / ATCC 24843) GN=ecm29 PE=1 SV=1	75	2	C	135.383	179.5	151.533
sp|P09322|H4_SCHPO	hhf1	Histone H4 OS=Schizosaccharomyces pombe (strain 972 / ATCC 24843) GN=hhf1 PE=1 SV=2	637	6	C	675.476	892.045	562.534
sp|Q9UTE4|YFM8_SCHPO	SPAC222.08c	Uncharacterized glutaminase C222.08c OS=Schizosaccharomyces pombe (strain 972 / ATCC 24843) GN=SPAC222.08c PE=3 SV=1	418	2	C	176.952	232.545	244.313
sp|O94388|VPS92_SCHPO	vps902	Vacuolar protein sorting-associated protein 9b OS=Schizosaccharomyces pombe (strain 972 / ATCC 24843) GN=vps902 PE=1 SV=1	205	2	C	72.8698	95.6946	109.762
sp|O94300|YOOH_SCHPO	SPBC887.17	Putative xanthine/uracil permease C887.17 OS=Schizosaccharomyces pombe (strain 972 / ATCC 24843) GN=SPBC887.17 PE=3 SV=1	1341	2	C	121.291	159.28	287.467
sp|Q09911|YAJE_SCHPO	SPAC30D11.14c	Uncharacterized protein C30D11.14c OS=Schizosaccharomyces pombe (strain 972 / ATCC 24843) GN=SPAC30D11.14c PE=4 SV=1	528	2	C	67.5791	88.729	120.486
sp|P79057|RS23_SCHPO	rps23a	40S ribosomal protein S23 OS=Schizosaccharomyces pombe (strain 972 / ATCC 24843) GN=rps23a PE=1 SV=2	1536	3	C	185.239	242.548	211.164
sp|P22774|HSP7M_SCHPO	ssp1	Heat shock 70 kDa protein, mitochondrial OS=Schizosaccharomyces pombe (strain 972 / ATCC 24843) GN=ssp1 PE=2 SV=2	29	35	C	3793.15	4965.67	4342.32
sp|Q1MTN8|YGC1_SCHPO	SPBC16D10.01c	UPF0661 TPR repeat-containing protein C16D10.01c OS=Schizosaccharomyces pombe (strain 972 / ATCC 24843) GN=SPBC16D10.01c PE=3 SV=2	667	3	C	87.8964	114.994	152.167
sp|O13672|RL8_SCHPO	rpl8	60S ribosomal protein L8 OS=Schizosaccharomyces pombe (strain 972 / ATCC 24843) GN=rpl8 PE=1 SV=3	1416	29	C	2902.86	3796.05	2228.07
sp|P52822|RL5A_SCHPO	rpl5a	60S ribosomal protein L5-A OS=Schizosaccharomyces pombe (strain 972 / ATCC 24843) GN=rpl5a PE=1 SV=2	909	33	C	2851.13	3720.81	2152.29
sp|Q9UT87|IMG1_SCHPO	img1	54S ribosomal protein subunit img1, mitochondrial OS=Schizosaccharomyces pombe (strain 972 / ATCC 24843) GN=img1 PE=3 SV=1	854	3	C	161.895	211.155	147.639
sp|O43082|RR14C_SCHPO	rrp14c	Ribosomal RNA-processing protein 14-C OS=Schizosaccharomyces pombe (strain 972 / ATCC 24843) GN=rrp14c PE=1 SV=1	1619	3	C	173.656	226.291	171.296
sp|O59817|EFR3_SCHPO	efr3	Protein efr3 OS=Schizosaccharomyces pombe (strain 972 / ATCC 24843) GN=efr3 PE=1 SV=1	1074	4	C	518.93	675.016	713.167
sp|P78954|IF4E1_SCHPO	tif451	Eukaryotic translation initiation factor 4E-1 OS=Schizosaccharomyces pombe (strain 972 / ATCC 24843) GN=tif451 PE=3 SV=1	1037	3	C	389.814	505.041	530.483
sp|P78946|RL26_SCHPO	rpl26	60S ribosomal protein L26 OS=Schizosaccharomyces pombe (strain 972 / ATCC 24843) GN=rpl26 PE=3 SV=1	277	8	C	793.976	1028.2	671.109
sp|O13844|YFG5_SCHPO	SPAC19G12.05	Uncharacterized mitochondrial carrier C19G12.05 OS=Schizosaccharomyces pombe (strain 972 / ATCC 24843) GN=SPAC19G12.05 PE=3 SV=1	1090	4	C	279.807	361.283	367.825
sp|Q9P382|NUP82_SCHPO	nup82	Nucleoporin nup82 OS=Schizosaccharomyces pombe (strain 972 / ATCC 24843) GN=nup82 PE=3 SV=1	1355	3	C	234.1	299.769	295.65
sp|Q09668|RL22_SCHPO	rpl22	60S ribosomal protein L22 OS=Schizosaccharomyces pombe (strain 972 / ATCC 24843) GN=rpl22 PE=1 SV=3	1264	8	C	927.733	1187.83	784.22
sp|O74763|YBE8_SCHPO	SPBC17D11.08	Uncharacterized WD repeat-containing protein C17D11.08 OS=Schizosaccharomyces pombe (strain 972 / ATCC 24843) GN=SPBC17D11.08 PE=1 SV=1	479	2	C	175.662	224.319	230.338
sp|O94268|NOP2_SCHPO	SPBP8B7.20c	25S rRNA (cytosine-C(5))-methyltransferase nop2 OS=Schizosaccharomyces pombe (strain 972 / ATCC 24843) GN=SPBP8B7.20c PE=1 SV=1	672	10	C	543.764	694.02	717.402
sp|Q9P3B2|RCF2_SCHPO	rcf2	Respiratory supercomplex factor 2 homolog C1565.01 OS=Schizosaccharomyces pombe (strain 972 / ATCC 24843) GN=rcf2 PE=3 SV=1	1083	4	C	181.631	230.363	315.5
sp|Q10265|HSP71_SCHPO	ssa1	Probable heat shock protein ssa1 OS=Schizosaccharomyces pombe (strain 972 / ATCC 24843) GN=ssa1 PE=1 SV=2	343	31	C	2447.69	3100.54	7805.49
sp|O74745|ANP1_SCHPO	anp1	Mannan polymerase II complex anp1 subunit OS=Schizosaccharomyces pombe (strain 972 / ATCC 24843) GN=anp1 PE=3 SV=1	876	2	C	116.297	146.91	183.92
sp|O74496|COPD_SCHPO	ret2	Coatomer subunit delta OS=Schizosaccharomyces pombe (strain 972 / ATCC 24843) GN=ret2 PE=3 SV=1	962	3	C	199.323	251.343	379.885
sp|O14140|DSS1_SCHPO	dss1	mRNA export factor dss1 OS=Schizosaccharomyces pombe (strain 972 / ATCC 24843) GN=dss1 PE=1 SV=1	49	2	C	88.8354	111.987	169.948
sp|Q9P783|RRB1_SCHPO	rrb1	Ribosome assembly protein rrb1 OS=Schizosaccharomyces pombe (strain 972 / ATCC 24843) GN=rrb1 PE=1 SV=1	15	2	C	68.1012	85.846	120.902
sp|O94466|RGA7_SCHPO	rga7	Probable Rho-GTPase-activating protein 7 OS=Schizosaccharomyces pombe (strain 972 / ATCC 24843) GN=rga7 PE=1 SV=1	323	3	C	112.422	141.651	166.802
sp|O42846|RL34A_SCHPO	rpl34a	60S ribosomal protein L34-A OS=Schizosaccharomyces pombe (strain 972 / ATCC 24843) GN=rpl34a PE=3 SV=1	194	7	C	791.245	994.818	523.251
sp|P18869|LEU3_SCHPO	leu1	3-isopropylmalate dehydrogenase OS=Schizosaccharomyces pombe (strain 972 / ATCC 24843) GN=leu1 PE=1 SV=1	452	9	C	628.737	789.935	988.608
sp|Q10061|LHS1_SCHPO	SPAC1F5.06	Heat shock protein 70 homolog lhs1 OS=Schizosaccharomyces pombe (strain 972 / ATCC 24843) GN=SPAC1F5.06 PE=3 SV=1	161	8	C	312.24	392.285	770.923
sp|Q9UTH9|DUS3_SCHPO	dus3	tRNA-dihydrouridine(47) synthase [NAD(P)(+)] OS=Schizosaccharomyces pombe (strain 972 / ATCC 24843) GN=dus3 PE=3 SV=1	633	5	C	194.228	243.394	235.603
sp|P87123|RPB11_SCHPO	rpb11	DNA-directed RNA polymerase II subunit RPB11 OS=Schizosaccharomyces pombe (strain 972 / ATCC 24843) GN=rpb11 PE=1 SV=1	1556	5	C	431.101	540.222	499.984
sp|P04551|CDK1_SCHPO	cdc2	Cyclin-dependent kinase 1 OS=Schizosaccharomyces pombe (strain 972 / ATCC 24843) GN=cdc2 PE=1 SV=1	1287	2	C	195.621	245.057	242.079
sp|P28189|RS13_SCHPO	rps13	40S ribosomal protein S13 OS=Schizosaccharomyces pombe (strain 972 / ATCC 24843) GN=rps13 PE=1 SV=2	88	8	C	323.082	403.277	488.91
sp|Q9UTN1|OAC1_SCHPO	oac1	Mitochondrial oxaloacetate transport protein OS=Schizosaccharomyces pombe (strain 972 / ATCC 24843) GN=oac1 PE=3 SV=1	381	5	C	324.617	404.586	312.638
sp|Q10168|NSP1_SCHPO	nsp1	Nucleoporin nsp1 OS=Schizosaccharomyces pombe (strain 972 / ATCC 24843) GN=nsp1 PE=1 SV=1	561	2	C	81.2781	101.29	107.7
sp|Q9Y7M6|RRP1_SCHPO	SPBC9B6.07	Ribosomal RNA-processing protein 1 homolog OS=Schizosaccharomyces pombe (strain 972 / ATCC 24843) GN=SPBC9B6.07 PE=3 SV=1	118	2	C	328.151	407.74	299.857
sp|Q9UU88|KAD6_SCHPO	SPCC830.11c	Adenylate kinase isoenzyme 6 homolog OS=Schizosaccharomyces pombe (strain 972 / ATCC 24843) GN=SPCC830.11c PE=3 SV=1	1361	2	C	90.9687	113.022	131.904
sp|O74453|SKB15_SCHPO	skb15	Shk1 kinase-binding protein 15 OS=Schizosaccharomyces pombe (strain 972 / ATCC 24843) GN=skb15 PE=3 SV=1	1377	2	C	82.2921	101.752	78.1116
sp|Q9Y7M4|LSM3_SCHPO	lsm3	Probable U6 snRNA-associated Sm-like protein LSm3 OS=Schizosaccharomyces pombe (strain 972 / ATCC 24843) GN=lsm3 PE=1 SV=2	1168	2	C	81.2148	100.077	67.3354
sp|Q10081|YAO2_SCHPO	SPAC11D3.02c	UPF0039 protein C11D3.02c OS=Schizosaccharomyces pombe (strain 972 / ATCC 24843) GN=SPAC11D3.02c PE=3 SV=1	998	5	C	178.63	220.114	173.71
sp|O42911|RT25_SCHPO	rsm25	37S ribosomal protein S25, mitochondrial OS=Schizosaccharomyces pombe (strain 972 / ATCC 24843) GN=rsm25 PE=3 SV=1	394	2	C	89.1196	109.791	77.9079
sp|Q9P6K0|YLA3_SCHPO	SPAC1527.03	Uncharacterized HTH La-type RNA-binding protein C1527.03 OS=Schizosaccharomyces pombe (strain 972 / ATCC 24843) GN=SPAC1527.03 PE=1 SV=1	498	6	C	453.898	557.252	560.931
sp|Q09779|THO2_SCHPO	tho2	THO complex subunit 2 OS=Schizosaccharomyces pombe (strain 972 / ATCC 24843) GN=tho2 PE=1 SV=3	1387	2	C	80.3162	98.2224	109.168
sp|O42668|TPR1_SCHPO	tpr1	Tetratricopeptide repeat protein 1 OS=Schizosaccharomyces pombe (strain 972 / ATCC 24843) GN=tpr1 PE=1 SV=1	1542	2	C	95.0634	116.18	110.398
sp|O13956|TSR1_SCHPO	SPAC23H4.15	Ribosome biogenesis protein tsr1 homolog OS=Schizosaccharomyces pombe (strain 972 / ATCC 24843) GN=SPAC23H4.15 PE=3 SV=1	1386	2	C	132.323	161.596	149.652
sp|Q9P6M9|RM01_SCHPO	mrpl1	54S ribosomal protein L1, mitochondrial OS=Schizosaccharomyces pombe (strain 972 / ATCC 24843) GN=mrpl1 PE=3 SV=1	1333	2	C	85.5237	104.396	99.2313
sp|Q9P7V5|SEC7B_SCHPO	sec72	Protein transport protein sec72 OS=Schizosaccharomyces pombe (strain 972 / ATCC 24843) GN=sec72 PE=1 SV=1	286	7	C	315.158	384.438	394.935
sp|O42937|COPB2_SCHPO	sec27	Probable coatomer subunit beta' OS=Schizosaccharomyces pombe (strain 972 / ATCC 24843) GN=sec27 PE=3 SV=2	353	14	C	863.248	1049.17	948.023
sp|Q9URY0|YTM1_SCHPO	ytm1	Ribosome biogenesis protein ytm1 OS=Schizosaccharomyces pombe (strain 972 / ATCC 24843) GN=ytm1 PE=1 SV=1	562	11	C	657.737	798.469	654.834
sp|O74627|CG1C_SCHPO	pch1	Cyclin pch1 OS=Schizosaccharomyces pombe (strain 972 / ATCC 24843) GN=pch1 PE=1 SV=1	1241	4	C	493.542	598.232	604.901
sp|Q9P772|GUAA_SCHPO	gua1	GMP synthase [glutamine-hydrolyzing] OS=Schizosaccharomyces pombe (strain 972 / ATCC 24843) GN=gua1 PE=3 SV=1	335	9	C	239.794	290.482	338.817
sp|Q9USU2|DIM1_SCHPO	dim1	Dimethyladenosine transferase OS=Schizosaccharomyces pombe (strain 972 / ATCC 24843) GN=dim1 PE=3 SV=1	1520	2	C	46.9086	56.6874	105.485
sp|O43079|AP1B1_SCHPO	apl2	AP-1 complex subunit beta-1 OS=Schizosaccharomyces pombe (strain 972 / ATCC 24843) GN=apl2 PE=1 SV=1	661	5	C	369.126	444.888	462.891
sp|O59672|YB89_SCHPO	SPBC29A3.09c	Uncharacterized ABC transporter ATP-binding protein C29A3.09c OS=Schizosaccharomyces pombe (strain 972 / ATCC 24843) GN=SPBC29A3.09c PE=3 SV=1	803	7	C	377.616	454.757	594.715
sp|O14011|PRP19_SCHPO	prp19	Pre-mRNA-processing factor 19 OS=Schizosaccharomyces pombe (strain 972 / ATCC 24843) GN=prp19 PE=1 SV=1	1091	6	C	229.354	275.745	253.182
sp|Q10057|PDI1_SCHPO	SPAC1F5.02	Putative protein disulfide-isomerase C1F5.02 OS=Schizosaccharomyces pombe (strain 972 / ATCC 24843) GN=SPAC1F5.02 PE=3 SV=1	93	14	C	446.736	535.926	921.605
sp|Q09857|USO1_SCHPO	uso1	Intracellular protein transport protein uso1 OS=Schizosaccharomyces pombe (strain 972 / ATCC 24843) GN=uso1 PE=3 SV=3	775	7	C	341.545	407.953	451.693
sp|O13788|SSR1_SCHPO	ssr1	SWI/SNF and RSC complexes subunit ssr1 OS=Schizosaccharomyces pombe (strain 972 / ATCC 24843) GN=ssr1 PE=1 SV=1	825	6	C	293.954	351.044	446.035
sp|Q9Y876|SHR3_SCHPO	psh3	Secretory component protein psh3 OS=Schizosaccharomyces pombe (strain 972 / ATCC 24843) GN=psh3 PE=3 SV=1	1060	2	C	72.675	86.7349	80.3933
sp|O13671|CSE1_SCHPO	kap109	Importin-alpha re-exporter OS=Schizosaccharomyces pombe (strain 972 / ATCC 24843) GN=kap109 PE=3 SV=2	1121	8	C	615.326	733.805	683.133
sp|O74905|RL9B_SCHPO	rpl9b	60S ribosomal protein L9-B OS=Schizosaccharomyces pombe (strain 972 / ATCC 24843) GN=rpl9b PE=3 SV=1	663	10	C	1156.32	1377.74	780.213
sp|Q9Y809|NAA25_SCHPO	arm1	N-terminal acetyltransferase B complex subunit arm1 OS=Schizosaccharomyces pombe (strain 972 / ATCC 24843) GN=arm1 PE=3 SV=1	1040	2	C	64.4008	76.5911	124.696
sp|Q9P7R9|SYF1_SCHPO	cwf3	Pre-mRNA-splicing factor cwf3 OS=Schizosaccharomyces pombe (strain 972 / ATCC 24843) GN=cwf3 PE=1 SV=1	349	2	C	81.9396	96.9621	98.0618
sp|Q9P5N2|AAT1_SCHPO	aat1	Amino acid transporter 1 OS=Schizosaccharomyces pombe (strain 972 / ATCC 24843) GN=aat1 PE=3 SV=1	471	3	C	109.767	129.844	178.396
sp|Q9Y709|SKP1_SCHPO	skp1	Suppressor of kinetochore protein 1 OS=Schizosaccharomyces pombe (strain 972 / ATCC 24843) GN=skp1 PE=1 SV=1	1004	3	C	85.0834	100.392	175.515
sp|O74891|COPZ_SCHPO	ret3	Probable coatomer subunit zeta OS=Schizosaccharomyces pombe (strain 972 / ATCC 24843) GN=ret3 PE=3 SV=1	943	4	C	360.453	425.245	471.794
sp|P17478|RLA4_SCHPO	rpp202	60S acidic ribosomal protein P2-beta OS=Schizosaccharomyces pombe (strain 972 / ATCC 24843) GN=rpp202 PE=1 SV=1	918	2	C	361.002	425.733	65.4369
sp|O74505|YJD2_SCHPO	SPCC594.02c	Uncharacterized protein C594.02c OS=Schizosaccharomyces pombe (strain 972 / ATCC 24843) GN=SPCC594.02c PE=1 SV=1	1144	2	C	111.723	131.553	171.195
sp|O60084|TIM44_SCHPO	tim44	Mitochondrial import inner membrane translocase subunit tim44 OS=Schizosaccharomyces pombe (strain 972 / ATCC 24843) GN=tim44 PE=3 SV=1	388	11	C	566.298	665.175	785.936
sp|Q09330|MLO3_SCHPO	mlo3	mRNA export protein mlo3 OS=Schizosaccharomyces pombe (strain 972 / ATCC 24843) GN=mlo3 PE=1 SV=1	607	13	C	1209.91	1420.21	996.971
sp|Q9P7S4|TAF4_SCHPO	taf4	Transcription initiation factor TFIID subunit 4 OS=Schizosaccharomyces pombe (strain 972 / ATCC 24843) GN=taf4 PE=3 SV=1	698	3	C	114.057	133.792	205.183
sp|Q10333|PEX11_SCHPO	pex11	Peroxisomal biogenesis factor 11 OS=Schizosaccharomyces pombe (strain 972 / ATCC 24843) GN=pex11 PE=3 SV=2	391	6	C	194.902	228.004	267.577
sp|Q9HGK2|HOP2_SCHPO	meu13	Homologous-pairing protein 2 OS=Schizosaccharomyces pombe (strain 972 / ATCC 24843) GN=meu13 PE=1 SV=1	668	2	C	91.281	106.729	234.542
sp|O42914|YBI8_SCHPO	SPBC16A3.08c	Uncharacterized protein C16A3.08c OS=Schizosaccharomyces pombe (strain 972 / ATCC 24843) GN=SPBC16A3.08c PE=1 SV=1	444	17	C	2353	2750.11	1906.21
sp|Q9UUE5|NUP85_SCHPO	nup85	Nucleoporin nup85 OS=Schizosaccharomyces pombe (strain 972 / ATCC 24843) GN=nup85 PE=1 SV=1	1198	2	C	90.2406	105.318	82.5007
sp|O74485|CUE3_SCHPO	SPCC1906.02c	CUE domain-containing protein 3 OS=Schizosaccharomyces pombe (strain 972 / ATCC 24843) GN=SPCC1906.02c PE=1 SV=1	1105	2	C	128.208	149.175	180.881
sp|P87112|NOT1_SCHPO	not1	General negative regulator of transcription subunit 1 OS=Schizosaccharomyces pombe (strain 972 / ATCC 24843) GN=not1 PE=1 SV=1	26	14	C	780.566	907.393	954.526
sp|Q9USK8|AGS1_SCHPO	ags1	Cell wall alpha-1,3-glucan synthase ags1 OS=Schizosaccharomyces pombe (strain 972 / ATCC 24843) GN=ags1 PE=1 SV=3	570	7	C	310.392	360.207	365.063
sp|O14273|YET4_SCHPO	SPAC8C9.04	Meiotically up-regulated protein C8C9.04 OS=Schizosaccharomyces pombe (strain 972 / ATCC 24843) GN=SPAC8C9.04 PE=1 SV=1	565	3	C	248.018	287.765	447.916
sp|Q9UTP0|RL30B_SCHPO	rpl30b	60S ribosomal protein L30-2 OS=Schizosaccharomyces pombe (strain 972 / ATCC 24843) GN=rpl30b PE=3 SV=1	1427	3	C	196.709	228.093	103.013
sp|O42861|FFT3_SCHPO	fft3	ATP-dependent helicase fft3 OS=Schizosaccharomyces pombe (strain 972 / ATCC 24843) GN=fft3 PE=1 SV=1	320	7	C	331.276	382.464	439.206
sp|Q9UU91|YOP1_SCHPO	yop1	Protein yop1 OS=Schizosaccharomyces pombe (strain 972 / ATCC 24843) GN=yop1 PE=1 SV=1	1373	3	C	158.37	182.368	276.288
sp|Q9C1W3|ERG1_SCHPO	erg1	Probable squalene monooxygenase OS=Schizosaccharomyces pombe (strain 972 / ATCC 24843) GN=erg1 PE=3 SV=1	407	2	C	121.61	139.878	229.354
sp|Q9UT25|YFY2_SCHPO	SPAC9.02c	Uncharacterized N-acetyltransferase C9.02c OS=Schizosaccharomyces pombe (strain 972 / ATCC 24843) GN=SPAC9.02c PE=3 SV=1	1425	3	C	58.9737	67.831	92.0703
sp|Q09188|ADT_SCHPO	anc1	ADP,ATP carrier protein OS=Schizosaccharomyces pombe (strain 972 / ATCC 24843) GN=anc1 PE=2 SV=1	1213	14	C	827.185	947.346	1062.57
sp|Q10411|SPO15_SCHPO	spo15	Sporulation-specific protein 15 OS=Schizosaccharomyces pombe (strain 972 / ATCC 24843) GN=spo15 PE=1 SV=1	513	21	C	1138.37	1303.4	1555.65
sp|Q9US25|HRP1_SCHPO	hrp1	Chromodomain helicase hrp1 OS=Schizosaccharomyces pombe (strain 972 / ATCC 24843) GN=hrp1 PE=1 SV=1	347	7	C	393.566	450.214	463.953
sp|P36604|GRP78_SCHPO	bip1	78 kDa glucose-regulated protein homolog OS=Schizosaccharomyces pombe (strain 972 / ATCC 24843) GN=bip1 PE=3 SV=2	343	33	C	3024.34	3456.85	4363.77
sp|P78814|SRP2_SCHPO	srp2	Pre-mRNA-splicing factor srp2 OS=Schizosaccharomyces pombe (strain 972 / ATCC 24843) GN=srp2 PE=1 SV=2	233	14	C	1319.58	1507.36	842.379
sp|P79013|RS11_SCHPO	rps11a	40S ribosomal protein S11 OS=Schizosaccharomyces pombe (strain 972 / ATCC 24843) GN=rps11a PE=2 SV=2	843	9	C	892.54	1017.21	932.829
sp|O60085|MAP2_SCHPO	fma2	Methionine aminopeptidase 2 OS=Schizosaccharomyces pombe (strain 972 / ATCC 24843) GN=fma2 PE=3 SV=1	412	8	C	431.294	491.501	617.725
sp|P11620|YPT1_SCHPO	ypt1	GTP-binding protein ypt1 OS=Schizosaccharomyces pombe (strain 972 / ATCC 24843) GN=ypt1 PE=1 SV=2	1070	3	C	151.874	173.044	190.101
sp|P87157|YB0G_SCHPO	SPBC25H2.16c	Probable ADP-ribosylation factor-binding protein C25H2.16c OS=Schizosaccharomyces pombe (strain 972 / ATCC 24843) GN=SPBC25H2.16c PE=1 SV=1	42	13	C	815.938	925.323	1203.16
sp|P79016|RS19B_SCHPO	rps19b	40S ribosomal protein S19-B OS=Schizosaccharomyces pombe (strain 972 / ATCC 24843) GN=rps19b PE=3 SV=2	841	12	C	1352.51	1532.99	978.475
sp|Q09796|KA111_SCHPO	kap111	Importin beta-like protein kap111 OS=Schizosaccharomyces pombe (strain 972 / ATCC 24843) GN=kap111 PE=3 SV=1	1486	2	C	86.3829	97.7724	92.4422
sp|O14290|YF14_SCHPO	SPAC9E9.04	Uncharacterized protein C9E9.04 OS=Schizosaccharomyces pombe (strain 972 / ATCC 24843) GN=SPAC9E9.04 PE=4 SV=1	521	3	C	116.9	132.152	191.641
sp|O14187|SPP42_SCHPO	spp42	Pre-mRNA-splicing factor spp42 OS=Schizosaccharomyces pombe (strain 972 / ATCC 24843) GN=spp42 PE=1 SV=1	380	4	C	254.287	287.341	314.547
sp|O14469|RS22_SCHPO	rps22a	40S ribosomal protein S22 OS=Schizosaccharomyces pombe (strain 972 / ATCC 24843) GN=rps22a PE=2 SV=1	1118	12	C	1154.49	1303.03	1322.37
sp|P14068|XPO1_SCHPO	xpo1	Exportin-1 OS=Schizosaccharomyces pombe (strain 972 / ATCC 24843) GN=xpo1 PE=1 SV=3	429	9	C	440.454	496.912	600.73
sp|Q09849|ARP42_SCHPO	arp42	SWI/SNF and RSC complexes subunit arp42 OS=Schizosaccharomyces pombe (strain 972 / ATCC 24843) GN=arp42 PE=1 SV=2	1042	2	C	134.788	151.927	143.859
sp|Q9UTN6|SNF21_SCHPO	snf21	Chromatin structure-remodeling complex subunit snf21 OS=Schizosaccharomyces pombe (strain 972 / ATCC 24843) GN=snf21 PE=1 SV=1	665	4	C	122.44	137.701	183.259
sp|O14134|ELF1_SCHPO	elf1	mRNA export factor elf1 OS=Schizosaccharomyces pombe (strain 972 / ATCC 24843) GN=elf1 PE=1 SV=1	276	18	C	1079.2	1212.83	1451.19
sp|O13622|MS116_SCHPO	mss116	ATP-dependent RNA helicase mss116, mitochondrial OS=Schizosaccharomyces pombe (strain 972 / ATCC 24843) GN=mss116 PE=3 SV=1	549	3	C	111.908	125.649	191.365
sp|O42699|RL19B_SCHPO	rpl19b	60S ribosomal protein L19-B OS=Schizosaccharomyces pombe (strain 972 / ATCC 24843) GN=rpl19b PE=2 SV=2	371	2	C	102.146	114.521	86.7511
sp|O42906|GPN1_SCHPO	SPBC119.15	GPN-loop GTPase 1 OS=Schizosaccharomyces pombe (strain 972 / ATCC 24843) GN=SPBC119.15 PE=1 SV=1	1063	2	C	110.729	123.831	150.15
sp|Q09719|DBP10_SCHPO	dbp10	ATP-dependent RNA helicase dbp10 OS=Schizosaccharomyces pombe (strain 972 / ATCC 24843) GN=dbp10 PE=1 SV=1	476	5	C	215.118	240.525	192.071
sp|O43047|GRPE_SCHPO	mge1	GrpE protein homolog, mitochondrial OS=Schizosaccharomyces pombe (strain 972 / ATCC 24843) GN=mge1 PE=3 SV=1	395	2	C	83.6305	93.3224	157.682
sp|Q9P6R3|YOH7_SCHPO	SPBC13E7.07	Uncharacterized protein C13E7.07 OS=Schizosaccharomyces pombe (strain 972 / ATCC 24843) GN=SPBC13E7.07 PE=4 SV=1	913	3	C	217.277	242.435	232.893
sp|O14048|UBX2_SCHPO	ubx2	UBX domain-containing protein 2 OS=Schizosaccharomyces pombe (strain 972 / ATCC 24843) GN=ubx2 PE=1 SV=1	463	2	C	139.601	155.477	163.206
sp|Q10421|RS28_SCHPO	rps28a	40S ribosomal protein S28 OS=Schizosaccharomyces pombe (strain 972 / ATCC 24843) GN=rps28a PE=3 SV=1	905	12	C	1025.1	1141.47	741.948
sp|Q9UUE2|CSX2_SCHPO	csx2	Protein csx2 OS=Schizosaccharomyces pombe (strain 972 / ATCC 24843) GN=csx2 PE=1 SV=1	551	7	C	417.009	463.656	501.014
sp|O14176|PRP40_SCHPO	prp40	Pre-mRNA-processing protein prp40 OS=Schizosaccharomyces pombe (strain 972 / ATCC 24843) GN=prp40 PE=1 SV=1	51	3	C	251.732	279.78	218.287
sp|O60100|IMB4_SCHPO	kap123	Probable importin subunit beta-4 OS=Schizosaccharomyces pombe (strain 972 / ATCC 24843) GN=kap123 PE=3 SV=1	553	21	C	1881.71	2089.47	2435.02
sp|Q9Y7X4|YGRG_SCHPO	SPBC365.16	Uncharacterized membrane protein C365.16 OS=Schizosaccharomyces pombe (strain 972 / ATCC 24843) GN=SPBC365.16 PE=4 SV=1	1179	4	C	221.753	245.912	226.873
sp|O14233|RNA14_SCHPO	rna14	mRNA 3'-end-processing protein rna14 OS=Schizosaccharomyces pombe (strain 972 / ATCC 24843) GN=rna14 PE=3 SV=1	334	4	C	193.261	214.203	267.284
sp|O59865|RS24B_SCHPO	rps24b	40S ribosomal protein S24-B OS=Schizosaccharomyces pombe (strain 972 / ATCC 24843) GN=rps24b PE=2 SV=3	1548	3	C	304.198	336.916	202.082
sp|O74352|HOB1_SCHPO	hob1	Protein hob1 OS=Schizosaccharomyces pombe (strain 972 / ATCC 24843) GN=hob1 PE=1 SV=1	127	12	C	704.494	778.217	784.432
sp|O59823|VATD_SCHPO	vma8	V-type proton ATPase subunit D OS=Schizosaccharomyces pombe (strain 972 / ATCC 24843) GN=vma8 PE=1 SV=1	842	4	C	200.442	221.403	308.976
sp|Q9P7W7|YGQ3_SCHPO	SPBC1703.03c	Uncharacterized ARM-like repeat-containing protein C1703.03c OS=Schizosaccharomyces pombe (strain 972 / ATCC 24843) GN=SPBC1703.03c PE=3 SV=1	136	7	C	393.281	434.391	633.93
sp|O13704|YEU5_SCHPO	SPAC13F5.05	Thioredoxin domain-containing protein C13F5.05, mitochondrial OS=Schizosaccharomyces pombe (strain 972 / ATCC 24843) GN=SPAC13F5.05 PE=3 SV=2	809	3	C	334.538	368.991	277.468
sp|P87178|YB1D_SCHPO	SPBC3D6.13c	Uncharacterized protein C3D6.13c OS=Schizosaccharomyces pombe (strain 972 / ATCC 24843) GN=SPBC3D6.13c PE=1 SV=1	1263	3	C	218.23	240.517	275.751
sp|Q9UTE6|MAK16_SCHPO	mak16	Protein mak16 OS=Schizosaccharomyces pombe (strain 972 / ATCC 24843) GN=mak16 PE=3 SV=1	362	4	C	267.655	294.883	273.669
sp|P40232|CSK2B_SCHPO	ckb1	Casein kinase II subunit beta OS=Schizosaccharomyces pombe (strain 972 / ATCC 24843) GN=ckb1 PE=2 SV=2	1254	2	C	102.945	113.303	58.8278
sp|Q09818|YAC4_SCHPO	SPAC16C9.04c	Putative general negative regulator of transcription C16C9.04c OS=Schizosaccharomyces pombe (strain 972 / ATCC 24843) GN=SPAC16C9.04c PE=3 SV=1	82	5	C	253.342	278.614	311.848
sp|Q9Y7Z1|NOP16_SCHPO	nop16	Nucleolar protein 16 OS=Schizosaccharomyces pombe (strain 972 / ATCC 24843) GN=nop16 PE=3 SV=1	643	5	C	742.764	814.798	627.246
sp|O94512|OBP1_SCHPO	obp1	Oxysterol-binding protein-like protein 1 OS=Schizosaccharomyces pombe (strain 972 / ATCC 24843) GN=obp1 PE=1 SV=1	647	2	C	48.8991	53.5252	100.221
sp|P87240|NOT2_SCHPO	not2	General negative regulator of transcription subunit 2 OS=Schizosaccharomyces pombe (strain 972 / ATCC 24843) GN=not2 PE=1 SV=2	511	5	C	255.77	279.57	359.015
sp|Q10475|IF4G_SCHPO	tif471	Eukaryotic translation initiation factor 4 gamma OS=Schizosaccharomyces pombe (strain 972 / ATCC 24843) GN=tif471 PE=1 SV=1	167	32	C	3537.96	3857.92	3322.14
sp|P78763|YG1D_SCHPO	SPBC83.13	Uncharacterized mitochondrial carrier C83.13 OS=Schizosaccharomyces pombe (strain 972 / ATCC 24843) GN=SPBC83.13 PE=2 SV=2	1242	4	C	246.264	268.104	283.622
sp|P87140|COPG_SCHPO	sec21	Probable coatomer subunit gamma OS=Schizosaccharomyces pombe (strain 972 / ATCC 24843) GN=sec21 PE=1 SV=1	78	11	C	544.284	592.167	643.583
sp|O74314|MET7_SCHPO	SPBC15D4.09c	Probable cystathionine gamma-synthase OS=Schizosaccharomyces pombe (strain 972 / ATCC 24843) GN=SPBC15D4.09c PE=3 SV=1	415	2	C	76.2126	82.8409	114.931
sp|Q10368|YDBI_SCHPO	SPAC22E12.18	Uncharacterized protein C22E12.18 OS=Schizosaccharomyces pombe (strain 972 / ATCC 24843) GN=SPAC22E12.18 PE=1 SV=1	840	4	C	242.542	263.519	339.327
sp|Q10146|RRP6_SCHPO	rrp6	Exosome complex exonuclease rrp6 OS=Schizosaccharomyces pombe (strain 972 / ATCC 24843) GN=rrp6 PE=3 SV=2	122	7	C	349.395	379.525	438.731
sp|O14023|ELP3_SCHPO	elp3	Probable elongator complex protein 3 OS=Schizosaccharomyces pombe (strain 972 / ATCC 24843) GN=elp3 PE=3 SV=1	706	8	C	226.544	246.006	416.1
sp|P49731|MCM6_SCHPO	mcm6	DNA replication licensing factor mcm6 OS=Schizosaccharomyces pombe (strain 972 / ATCC 24843) GN=mcm6 PE=1 SV=2	244	2	C	135.243	146.729	122.422
sp|O42931|PRS7_SCHPO	rpt1	26S protease regulatory subunit 7 homolog OS=Schizosaccharomyces pombe (strain 972 / ATCC 24843) GN=rpt1 PE=1 SV=2	678	21	C	1671.72	1813.43	2537.02
sp|Q10143|PFD3_SCHPO	SPAC3H8.07c	Probable prefoldin subunit 3 OS=Schizosaccharomyces pombe (strain 972 / ATCC 24843) GN=SPAC3H8.07c PE=3 SV=1	493	4	C	98.0219	105.932	178.146
sp|Q9P7D4|ACON2_SCHPO	SPBP4H10.15	Homocitrate dehydratase, mitochondrial OS=Schizosaccharomyces pombe (strain 972 / ATCC 24843) GN=SPBP4H10.15 PE=3 SV=3	747	10	C	877.824	948.574	781.101
sp|O14341|RM35_SCHPO	SPBC2F12.10	54S ribosomal protein L35, mitochondrial OS=Schizosaccharomyces pombe (strain 972 / ATCC 24843) GN=SPBC2F12.10 PE=3 SV=2	1318	2	C	110.591	119.356	98.5635
sp|Q9USM4|LUC7_SCHPO	usp106	U1 snRNP-associated protein usp106 OS=Schizosaccharomyces pombe (strain 972 / ATCC 24843) GN=usp106 PE=1 SV=1	776	4	C	228.985	247.074	220.761
sp|P79088|SC61A_SCHPO	sec61	Protein transport protein sec61 subunit alpha OS=Schizosaccharomyces pombe (strain 972 / ATCC 24843) GN=sec61 PE=2 SV=1	1606	2	C	118.428	127.723	131.286
sp|O14085|SEC72_SCHPO	sec72	Translocation protein sec72 OS=Schizosaccharomyces pombe (strain 972 / ATCC 24843) GN=sec72 PE=3 SV=1	2	2	C	68.838	74.2106	125.39
sp|Q9P6I5|KGUA_SCHPO	SPBC1198.05	Guanylate kinase OS=Schizosaccharomyces pombe (strain 972 / ATCC 24843) GN=SPBC1198.05 PE=3 SV=1	148	5	C	103.317	111.354	199.262
sp|P32747|PYRD_SCHPO	ura3	Dihydroorotate dehydrogenase (quinone), mitochondrial OS=Schizosaccharomyces pombe (strain 972 / ATCC 24843) GN=ura3 PE=1 SV=1	621	4	C	290.617	313.101	436.755
sp|O42644|PYRG_SCHPO	ura7	CTP synthase OS=Schizosaccharomyces pombe (strain 972 / ATCC 24843) GN=ura7 PE=3 SV=1	976	6	C	241.773	260.443	300.625
sp|P32235|GTP1_SCHPO	gtp1	GTP-binding protein 1 OS=Schizosaccharomyces pombe (strain 972 / ATCC 24843) GN=gtp1 PE=3 SV=2	488	5	C	163.119	175.502	226.537
sp|O42897|RPN3_SCHPO	rpn3	Probable 26S proteasome regulatory subunit rpn3 OS=Schizosaccharomyces pombe (strain 972 / ATCC 24843) GN=rpn3 PE=3 SV=2	769	10	C	494.23	530.733	876.798
sp|P50524|RPN12_SCHPO	rpn12	26S proteasome regulatory subunit rpn12 OS=Schizosaccharomyces pombe (strain 972 / ATCC 24843) GN=rpn12 PE=1 SV=1	890	4	C	343.046	367.756	547.691
sp|Q10163|RSMB_SCHPO	smb1	Small nuclear ribonucleoprotein-associated protein B OS=Schizosaccharomyces pombe (strain 972 / ATCC 24843) GN=smb1 PE=1 SV=1	1191	2	C	281.184	301.27	201.566
sp|O60073|YKT6_SCHPO	ykt6	Synaptobrevin homolog ykt6 OS=Schizosaccharomyces pombe (strain 972 / ATCC 24843) GN=ykt6 PE=3 SV=1	1308	8	C	261.366	280.034	416.544
sp|P40847|SAP1_SCHPO	sap1	Switch-activating protein 1 OS=Schizosaccharomyces pombe (strain 972 / ATCC 24843) GN=sap1 PE=1 SV=2	1449	5	C	470.504	504.087	548.205
sp|Q10179|SYG_SCHPO	grs1	Putative glycine--tRNA ligase OS=Schizosaccharomyces pombe (strain 972 / ATCC 24843) GN=grs1 PE=3 SV=1	99	18	C	926.323	990.953	1086.75
sp|P36620|ILVB_SCHPO	ilv1	Acetolactate synthase, mitochondrial OS=Schizosaccharomyces pombe (strain 972 / ATCC 24843) GN=ilv1 PE=3 SV=2	74	26	C	1871.25	2001.65	2202.47
sp|Q9URZ5|VPS1_SCHPO	vps1	Vacuolar protein sorting-associated protein 1 OS=Schizosaccharomyces pombe (strain 972 / ATCC 24843) GN=vps1 PE=3 SV=2	404	10	C	693.31	741.379	826.318
sp|Q1MTQ9|NIP7_SCHPO	nip7	60S ribosome subunit biogenesis protein nip7 OS=Schizosaccharomyces pombe (strain 972 / ATCC 24843) GN=nip7 PE=3 SV=1	1343	4	C	220.688	235.793	213.357
sp|Q9UUB6|UBLH2_SCHPO	uch2	Ubiquitin carboxyl-terminal hydrolase 2 OS=Schizosaccharomyces pombe (strain 972 / ATCC 24843) GN=uch2 PE=1 SV=1	68	6	C	359.356	383.409	660.029
sp|Q10105|GCN1_SCHPO	gcn1	Translational activator gcn1 OS=Schizosaccharomyces pombe (strain 972 / ATCC 24843) GN=gcn1 PE=3 SV=1	72	30	C	1729.27	1843.44	2533.01
sp|Q9UTK5|ALM1_SCHPO	alm1	Abnormal long morphology protein 1 OS=Schizosaccharomyces pombe (strain 972 / ATCC 24843) GN=alm1 PE=1 SV=1	829	8	C	249.809	266.26	334.402
sp|O74984|HSP15_SCHPO	SPCC338.06c	Heat shock protein homolog C338.06c OS=Schizosaccharomyces pombe (strain 972 / ATCC 24843) GN=SPCC338.06c PE=3 SV=1	1469	2	C	214.323	228.411	302.871
sp|O13870|NOT3_SCHPO	not3	General negative regulator of transcription subunit 3 OS=Schizosaccharomyces pombe (strain 972 / ATCC 24843) GN=not3 PE=1 SV=2	761	8	C	524.874	558.961	613.294
sp|Q9UUJ1|ARP2_SCHPO	arp2	Actin-related protein 2 OS=Schizosaccharomyces pombe (strain 972 / ATCC 24843) GN=arp2 PE=1 SV=1	172	3	C	64.9751	68.9403	101.705
sp|Q9P6P8|YIP4_SCHPO	SPAC644.13c	Protein YIP4 OS=Schizosaccharomyces pombe (strain 972 / ATCC 24843) GN=SPAC644.13c PE=1 SV=1	301	2	C	128.045	135.807	189.965
sp|Q9USN8|RQC2_SCHPO	mtr1	Ribosome quality control complex subunit 2 OS=Schizosaccharomyces pombe (strain 972 / ATCC 24843) GN=mtr1 PE=1 SV=2	805	2	C	151.97	161.057	242.736
sp|O74985|NAT1_SCHPO	nat1	N-terminal acetyltransferase A complex subunit nat1 OS=Schizosaccharomyces pombe (strain 972 / ATCC 24843) GN=nat1 PE=1 SV=1	302	10	C	562.4	595.632	814.964
sp|O14065|YC31_SCHPO	SPCC962.01	Uncharacterized protein C962.01 OS=Schizosaccharomyces pombe (strain 972 / ATCC 24843) GN=SPCC962.01 PE=2 SV=3	434	14	C	624.823	661.731	814.085
sp|P58234|RS19A_SCHPO	rps19a	40S ribosomal protein S19-A OS=Schizosaccharomyces pombe (strain 972 / ATCC 24843) GN=rps19a PE=2 SV=1	841	2	C	268.024	283.046	169.247
sp|Q9Y7X8|ARP5_SCHPO	arp5	Actin-like protein arp5 OS=Schizosaccharomyces pombe (strain 972 / ATCC 24843) GN=arp5 PE=1 SV=1	295	3	C	146.019	154.059	207.553
sp|O13796|RCQ1_SCHPO	rqc1	Ribosome quality control complex subunit 1 OS=Schizosaccharomyces pombe (strain 972 / ATCC 24843) GN=rqc1 PE=1 SV=2	1008	2	C	85.2495	89.9415	90.4177
sp|O42882|YFQ5_SCHPO	SPAC8E11.05c	Uncharacterized protein C8E11.05c OS=Schizosaccharomyces pombe (strain 972 / ATCC 24843) GN=SPAC8E11.05c PE=4 SV=1	1446	2	C	51.5856	54.3996	61.4739
sp|O14317|RLA6_SCHPO	rpp203	60S acidic ribosomal protein P2-C OS=Schizosaccharomyces pombe (strain 972 / ATCC 24843) GN=rpp203 PE=1 SV=2	54	7	C	999.951	1052.77	885.644
sp|O94447|SLM1_SCHPO	slm1	Cytoskeletal signaling protein slm1 OS=Schizosaccharomyces pombe (strain 972 / ATCC 24843) GN=slm1 PE=1 SV=1	325	4	C	175.841	184.94	219.393
sp|Q09868|CIP2_SCHPO	cip2	RNA-binding post-transcriptional regulator cip2 OS=Schizosaccharomyces pombe (strain 972 / ATCC 24843) GN=cip2 PE=1 SV=1	897	4	C	177.9	187.057	208.038
sp|Q9Y7J6|PPK21_SCHPO	ppk21	Serine/threonine-protein kinase ppk21 OS=Schizosaccharomyces pombe (strain 972 / ATCC 24843) GN=ppk21 PE=1 SV=3	1597	2	C	50.0741	52.4435	83.8341
sp|Q9UUC6|SMD3_SCHPO	smd3	Small nuclear ribonucleoprotein Sm D3 OS=Schizosaccharomyces pombe (strain 972 / ATCC 24843) GN=smd3 PE=1 SV=1	722	3	C	249.647	261.336	234.752
sp|Q9HGM9|DNJC7_SCHPO	SPBC543.02c	DnaJ homolog subfamily C member 7 homolog OS=Schizosaccharomyces pombe (strain 972 / ATCC 24843) GN=SPBC543.02c PE=3 SV=1	309	12	C	550.331	575.791	934.774
sp|Q9P7R0|ARO1_SCHPO	aro1	Pentafunctional AROM polypeptide OS=Schizosaccharomyces pombe (strain 972 / ATCC 24843) GN=aro1 PE=3 SV=1	57	18	C	1001.89	1046.07	1263.01
sp|O59809|IMA3_SCHPO	SPCC550.11	Probable importin c550.11 OS=Schizosaccharomyces pombe (strain 972 / ATCC 24843) GN=SPCC550.11 PE=3 SV=1	781	10	C	524.229	545.333	493.908
sp|P42656|RAD24_SCHPO	rad24	DNA damage checkpoint protein rad24 OS=Schizosaccharomyces pombe (strain 972 / ATCC 24843) GN=rad24 PE=1 SV=2	66	14	C	1245.46	1294.46	1975.98
sp|O13928|RHO3_SCHPO	rho3	GTP-binding protein rho3 OS=Schizosaccharomyces pombe (strain 972 / ATCC 24843) GN=rho3 PE=1 SV=2	815	5	C	152.583	158.066	202.566
sp|Q9UT08|2AAA_SCHPO	paa1	Protein phosphatase PP2A regulatory subunit A OS=Schizosaccharomyces pombe (strain 972 / ATCC 24843) GN=paa1 PE=3 SV=1	45	6	C	472.264	489.096	538.648
sp|O60125|BAG1A_SCHPO	bag101	BAG family molecular chaperone regulator 1A OS=Schizosaccharomyces pombe (strain 972 / ATCC 24843) GN=bag101 PE=2 SV=1	124	4	C	326.788	338.351	414.862
sp|P36596|FDFT_SCHPO	erg9	Squalene synthase OS=Schizosaccharomyces pombe (strain 972 / ATCC 24843) GN=erg9 PE=1 SV=1	317	5	C	229.537	237.558	306.614
sp|O94700|MBF1_SCHPO	mbf1	Multiprotein-bridging factor 1 OS=Schizosaccharomyces pombe (strain 972 / ATCC 24843) GN=mbf1 PE=3 SV=1	225	4	C	510.478	527.549	738.926
sp|O59838|HSP7F_SCHPO	pss1	Heat shock protein homolog pss1 OS=Schizosaccharomyces pombe (strain 972 / ATCC 24843) GN=pss1 PE=1 SV=2	135	38	C	3697.95	3821.17	6201.76
sp|Q09747|DBP5_SCHPO	dbp5	ATP-dependent RNA helicase dbp5 OS=Schizosaccharomyces pombe (strain 972 / ATCC 24843) GN=dbp5 PE=1 SV=1	383	14	C	1063.37	1098.79	1440.04
sp|Q02592|HMT1_SCHPO	hmt1	Heavy metal tolerance protein OS=Schizosaccharomyces pombe (strain 972 / ATCC 24843) GN=hmt1 PE=2 SV=3	792	4	C	247.182	255.404	312.923
sp|O74894|PRS6B_SCHPO	rpt3	26S protease regulatory subunit 6B homolog OS=Schizosaccharomyces pombe (strain 972 / ATCC 24843) GN=rpt3 PE=3 SV=1	284	12	C	932.151	962.583	1647.73
sp|Q9UU76|PUF6_SCHPO	puf6	Pumilio homology domain family member 6 OS=Schizosaccharomyces pombe (strain 972 / ATCC 24843) GN=puf6 PE=1 SV=1	423	10	C	1161.29	1199.16	1206.07
sp|O74762|RPN2_SCHPO	rpn2	26S proteasome regulatory subunit rpn2 OS=Schizosaccharomyces pombe (strain 972 / ATCC 24843) GN=rpn2 PE=1 SV=1	456	10	C	614.779	634.518	1007.33
sp|Q10178|SF3B1_SCHPO	prp10	U2 snRNP component prp10 OS=Schizosaccharomyces pombe (strain 972 / ATCC 24843) GN=prp10 PE=1 SV=3	934	2	C	150.854	155.693	166.452
sp|O94697|RFC5_SCHPO	rfc5	Replication factor C subunit 5 OS=Schizosaccharomyces pombe (strain 972 / ATCC 24843) GN=rfc5 PE=1 SV=1	839	4	C	196.892	203.19	241.806
sp|O60107|SNX41_SCHPO	snx41	Sorting nexin-41 OS=Schizosaccharomyces pombe (strain 972 / ATCC 24843) GN=snx41 PE=1 SV=1	783	2	C	127.875	131.956	140.068
sp|O14086|RPA49_SCHPO	rpa49	DNA-directed RNA polymerase I subunit rpa49 OS=Schizosaccharomyces pombe (strain 972 / ATCC 24843) GN=rpa49 PE=2 SV=1	319	3	C	303.255	312.933	384.021
sp|Q10335|RPN7_SCHPO	rpn7	Probable 26S proteasome regulatory subunit rpn7 OS=Schizosaccharomyces pombe (strain 972 / ATCC 24843) GN=rpn7 PE=2 SV=1	354	10	C	758.771	782.4	1218.06
sp|P30666|MCM3_SCHPO	mcm3	DNA replication licensing factor mcm3 OS=Schizosaccharomyces pombe (strain 972 / ATCC 24843) GN=mcm3 PE=1 SV=2	989	2	C	61.2557	63.0636	81.2219
sp|O74462|TAF6_SCHPO	taf6	Transcription initiation factor TFIID subunit 6 OS=Schizosaccharomyces pombe (strain 972 / ATCC 24843) GN=taf6 PE=1 SV=1	652	6	C	294.424	302.532	386.785
sp|Q09694|LYS1_SCHPO	lys3	Saccharopine dehydrogenase [NAD(+), L-lysine-forming] OS=Schizosaccharomyces pombe (strain 972 / ATCC 24843) GN=lys3 PE=1 SV=2	641	8	C	337.606	346.745	424.87
sp|P78920|YGNB_SCHPO	SPBC2D10.11c	Putative nucleosome assembly protein C2D10.11C OS=Schizosaccharomyces pombe (strain 972 / ATCC 24843) GN=SPBC2D10.11c PE=2 SV=2	1244	3	C	136.389	139.912	174.924
sp|O74873|SC231_SCHPO	sec231	Protein transport protein sec23-1 OS=Schizosaccharomyces pombe (strain 972 / ATCC 24843) GN=sec231 PE=3 SV=1	174	13	C	547.694	561.763	857.562
sp|Q10185|ABC2_SCHPO	abc2	ATP-binding cassette transporter abc2 OS=Schizosaccharomyces pombe (strain 972 / ATCC 24843) GN=abc2 PE=1 SV=1	377	4	C	149.867	153.701	187.852
sp|Q9UTG4|RS26B_SCHPO	rps26b	40S ribosomal protein S26-B OS=Schizosaccharomyces pombe (strain 972 / ATCC 24843) GN=rps26b PE=3 SV=1	759	2	C	405.881	416.196	359.674
sp|O60059|YG58_SCHPO	SPBC56F2.08c	Pumilio domain-containing protein C56F2.08c OS=Schizosaccharomyces pombe (strain 972 / ATCC 24843) GN=SPBC56F2.08c PE=1 SV=1	1260	4	C	213.222	218.597	259.048
sp|O59797|YCO6_SCHPO	SPCC364.06	Putative nucleosome assembly protein C364.06 OS=Schizosaccharomyces pombe (strain 972 / ATCC 24843) GN=SPCC364.06 PE=1 SV=1	470	10	C	653.178	669.018	723.846
sp|Q9HGM3|YTA12_SCHPO	yta12	Mitochondrial respiratory chain complexes assembly protein rca1 OS=Schizosaccharomyces pombe (strain 972 / ATCC 24843) GN=yta12 PE=3 SV=1	11	5	C	264.587	270.761	344.732
sp|P41820|BFR1_SCHPO	bfr1	Brefeldin A resistance protein OS=Schizosaccharomyces pombe (strain 972 / ATCC 24843) GN=bfr1 PE=1 SV=1	1033	5	C	197.707	202.251	268.96
sp|Q9URT2|YJU3_SCHPO	SPCP25A2.03	Uncharacterized protein P25A2.03 OS=Schizosaccharomyces pombe (strain 972 / ATCC 24843) GN=SPCP25A2.03 PE=1 SV=1	1041	2	C	97.6646	99.8369	121.969
sp|O94407|SEC65_SCHPO	sec65	Signal recognition particle sec65 subunit OS=Schizosaccharomyces pombe (strain 972 / ATCC 24843) GN=sec65 PE=3 SV=2	318	3	C	148.516	151.591	206.64
sp|Q09181|DHH1_SCHPO	ste13	Putative ATP-dependent RNA helicase ste13 OS=Schizosaccharomyces pombe (strain 972 / ATCC 24843) GN=ste13 PE=3 SV=1	1230	8	C	760.764	776.148	865.06
sp|P05764|RS21_SCHPO	rps21	40S ribosomal protein S21 OS=Schizosaccharomyces pombe (strain 972 / ATCC 24843) GN=rps21 PE=1 SV=2	1476	3	C	182.733	186.309	115.403
sp|O14018|SYSC_SCHPO	SPAC29A4.15	Serine--tRNA ligase, cytoplasmic OS=Schizosaccharomyces pombe (strain 972 / ATCC 24843) GN=SPAC29A4.15 PE=3 SV=1	903	4	C	297.34	302.791	522.451
sp|P87114|FFT1_SCHPO	fft1	ATP-dependent helicase fft1 OS=Schizosaccharomyces pombe (strain 972 / ATCC 24843) GN=fft1 PE=3 SV=1	347	2	C	77.0141	78.401	94.4059
sp|Q10268|MAC1_SCHPO	mac1	Membrane-anchored protein 1 OS=Schizosaccharomyces pombe (strain 972 / ATCC 24843) GN=mac1 PE=1 SV=1	1664	2	C	56.17	57.1614	87.3012
sp|Q9HDZ8|YKP6_SCHPO	SPAC589.06c	Uncharacterized protein C589.06c OS=Schizosaccharomyces pombe (strain 972 / ATCC 24843) GN=SPAC589.06c PE=1 SV=1	1062	2	C	58.2013	59.1851	147.749
sp|O14112|RS10A_SCHPO	rps10a	40S ribosomal protein S10-A OS=Schizosaccharomyces pombe (strain 972 / ATCC 24843) GN=rps10a PE=3 SV=1	311	5	C	321.469	326.733	302.632
sp|O60114|YG65_SCHPO	SPBC15C4.05	Uncharacterized helicase C15C4.05 OS=Schizosaccharomyces pombe (strain 972 / ATCC 24843) GN=SPBC15C4.05 PE=3 SV=1	1552	2	C	123.482	125.466	118.183
sp|O74729|PPIH_SCHPO	cyp3	Peptidyl-prolyl cis-trans isomerase cyp3 OS=Schizosaccharomyces pombe (strain 972 / ATCC 24843) GN=cyp3 PE=3 SV=1	966	2	C	51.6066	52.3579	73.551
sp|Q9UTI7|TYSY_SCHPO	SPAC15E1.04	Probable thymidylate synthase OS=Schizosaccharomyces pombe (strain 972 / ATCC 24843) GN=SPAC15E1.04 PE=3 SV=1	707	2	C	50.7478	51.3979	64.8315
sp|Q9UT56|RS26A_SCHPO	rps26a	40S ribosomal protein S26-A OS=Schizosaccharomyces pombe (strain 972 / ATCC 24843) GN=rps26a PE=3 SV=1	759	8	C	736.663	745.643	647.192
sp|O13901|YF3A_SCHPO	SPAC22A12.10	Uncharacterized CDP-alcohol phosphatidyltransferase class-I family protein C22A12.10 OS=Schizosaccharomyces pombe (strain 972 / ATCC 24843) GN=SPAC22A12.10 PE=3 SV=1	1718	2	C	61.0076	61.7487	132.861
sp|P87239|MDJ1_SCHPO	mdj1	DnaJ homolog 1, mitochondrial OS=Schizosaccharomyces pombe (strain 972 / ATCC 24843) GN=mdj1 PE=3 SV=1	179	12	C	989.126	1000.86	1314.38
sp|P41389|MCM5_SCHPO	mcm5	DNA replication licensing factor mcm5 OS=Schizosaccharomyces pombe (strain 972 / ATCC 24843) GN=mcm5 PE=1 SV=2	1227	2	C	122.372	123.813	112.332
sp|O14255|GCS1_SCHPO	SPAC6G10.09	Probable mannosyl-oligosaccharide glucosidase OS=Schizosaccharomyces pombe (strain 972 / ATCC 24843) GN=SPAC6G10.09 PE=3 SV=1	1514	2	C	92.2449	93.3202	136.426
sp|Q09916|HAS1_SCHPO	has1	ATP-dependent RNA helicase has1 OS=Schizosaccharomyces pombe (strain 972 / ATCC 24843) GN=has1 PE=1 SV=1	852	12	C	1295.06	1307.85	1121.14
sp|Q9UT76|EI2BB_SCHPO	tif222	Probable translation initiation factor eIF-2B subunit beta OS=Schizosaccharomyces pombe (strain 972 / ATCC 24843) GN=tif222 PE=1 SV=1	584	3	C	173.014	174.663	181.014
sp|Q9UTM3|RPN5_SCHPO	rpn5a	26S proteasome regulatory subunit rpn5 OS=Schizosaccharomyces pombe (strain 972 / ATCC 24843) GN=rpn5a PE=1 SV=1	230	12	C	874.404	882.479	1346.07
sp|P23636|PP2A2_SCHPO	ppa2	Major serine/threonine-protein phosphatase PP2A-2 catalytic subunit OS=Schizosaccharomyces pombe (strain 972 / ATCC 24843) GN=ppa2 PE=3 SV=1	945	2	C	58.4822	58.8983	82.579
sp|Q9UTQ7|ARP9_SCHPO	arp9	SWI/SNF and RSC complexes subunit arp9 OS=Schizosaccharomyces pombe (strain 972 / ATCC 24843) GN=arp9 PE=1 SV=1	908	3	C	240.291	241.887	314.774
sp|O42893|TREA_SCHPO	ntp1	Neutral trehalase OS=Schizosaccharomyces pombe (strain 972 / ATCC 24843) GN=ntp1 PE=1 SV=1	158	9	C	303.266	305.228	391.544
sp|O13370|DED1_SCHPO	ded1	ATP-dependent RNA helicase ded1 OS=Schizosaccharomyces pombe (strain 972 / ATCC 24843) GN=ded1 PE=1 SV=1	256	23	C	1470.19	1477.72	1431.38
sp|O94642|TAD2_SCHPO	tad2	tRNA-specific adenosine deaminase subunit tad2 OS=Schizosaccharomyces pombe (strain 972 / ATCC 24843) GN=tad2 PE=3 SV=2	1000	6	C	334.991	336.452	458.632
sp|O43028|VAC8_SCHPO	vac8	Vacuolar protein 8 OS=Schizosaccharomyces pombe (strain 972 / ATCC 24843) GN=vac8 PE=1 SV=4	70	2	C	135.432	135.917	127.9
sp|Q9C0X6|RUVB1_SCHPO	rvb1	RuvB-like helicase 1 OS=Schizosaccharomyces pombe (strain 972 / ATCC 24843) GN=rvb1 PE=3 SV=1	972	14	C	1057.47	1060.69	1525.42
sp|O14029|SEC16_SCHPO	sec16	COPII coat assembly protein sec16 OS=Schizosaccharomyces pombe (strain 972 / ATCC 24843) GN=sec16 PE=1 SV=2	126	2	C	91.8306	92.0105	148.273
sp|Q96WV5|COPA_SCHPO	SPBPJ4664.04	Putative coatomer subunit alpha OS=Schizosaccharomyces pombe (strain 972 / ATCC 24843) GN=SPBPJ4664.04 PE=1 SV=1	21	20	C	1420.66	1422.28	1610.1
sp|P56329|IF2B_SCHPO	tif212	Probable eukaryotic translation initiation factor 2 subunit beta OS=Schizosaccharomyces pombe (strain 972 / ATCC 24843) GN=tif212 PE=1 SV=2	694	20	C	2006.51	2007.82	1991.31
sp|O42993|FKBP_SCHPO	fkh1	Peptidyl-prolyl cis-trans isomerase OS=Schizosaccharomyces pombe (strain 972 / ATCC 24843) GN=fkh1 PE=3 SV=1	1084	3	C	139.691	139.71	458.686
sp|P31318|ARG56_SCHPO	arg11	Protein arg11, mitochondrial OS=Schizosaccharomyces pombe (strain 972 / ATCC 24843) GN=arg11 PE=3 SV=2	95	8	C	350.218	350.259	320.793
sp|Q09924|EI2BD_SCHPO	tif224	Probable translation initiation factor eIF-2B subunit delta OS=Schizosaccharomyces pombe (strain 972 / ATCC 24843) GN=tif224 PE=1 SV=1	1283	6	C	572.332	572.211	626.261
sp|O59680|CY1_SCHPO	cyt1	Cytochrome c1, heme protein, mitochondrial OS=Schizosaccharomyces pombe (strain 972 / ATCC 24843) GN=cyt1 PE=3 SV=1	863	4	C	58.1252	58.0406	204.84
sp|O60119|YH75_SCHPO	SPBC16G5.05c	Vesicle-associated membrane protein-associated protein C16G5.05c OS=Schizosaccharomyces pombe (strain 972 / ATCC 24843) GN=SPBC16G5.05c PE=1 SV=1	830	7	C	374.624	374.004	505.264
sp|O94754|RS18_SCHPO	rps18a	40S ribosomal protein S18 OS=Schizosaccharomyces pombe (strain 972 / ATCC 24843) GN=rps18a PE=1 SV=1	100	14	C	1204.93	1202.72	854.628
sp|O94288|NOC3_SCHPO	noc3	Nucleolar complex-associated protein 3 OS=Schizosaccharomyces pombe (strain 972 / ATCC 24843) GN=noc3 PE=1 SV=1	877	5	C	178.998	178.643	227.383
sp|O43011|SYH_SCHPO	hts1	Histidine--tRNA ligase, mitochondrial OS=Schizosaccharomyces pombe (strain 972 / ATCC 24843) GN=hts1 PE=1 SV=2	833	3	C	163.052	162.549	254.579
sp|O74919|RNC1_SCHPO	rnc1	RNA-binding protein rnc1 OS=Schizosaccharomyces pombe (strain 972 / ATCC 24843) GN=rnc1 PE=1 SV=1	366	9	C	662.027	659.817	969.257
sp|Q9P7X8|RPA2_SCHPO	rpa2	Probable DNA-directed RNA polymerase I subunit RPA2 OS=Schizosaccharomyces pombe (strain 972 / ATCC 24843) GN=rpa2 PE=3 SV=2	373	12	C	934.881	931.08	1118.17
sp|Q9USJ7|ETT1_SCHPO	nro1	Negative regulator of ofd1 OS=Schizosaccharomyces pombe (strain 972 / ATCC 24843) GN=nro1 PE=1 SV=1	487	5	C	156.943	156.284	224.212
sp|Q9P3T6|RS5B_SCHPO	rps5b	40S ribosomal protein S5-B OS=Schizosaccharomyces pombe (strain 972 / ATCC 24843) GN=rps5b PE=3 SV=1	720	13	C	1203.31	1198.05	911.676
sp|O74440|RPN8_SCHPO	rpn8	26S proteasome regulatory subunit rpn8 OS=Schizosaccharomyces pombe (strain 972 / ATCC 24843) GN=rpn8 PE=3 SV=1	201	5	C	219.565	218.574	383.175
sp|Q10101|RS7_SCHPO	rps7	40S ribosomal protein S7 OS=Schizosaccharomyces pombe (strain 972 / ATCC 24843) GN=rps7 PE=1 SV=2	340	16	C	2692.43	2680.01	1607.98
sp|Q09748|DNM1_SCHPO	dnm1	Dynamin-related protein dnm1 OS=Schizosaccharomyces pombe (strain 972 / ATCC 24843) GN=dnm1 PE=3 SV=1	404	6	C	531.185	527.552	644.411
sp|Q9Y7N9|YCKC_SCHPO	SPCC1450.12	PX domain-containing protein C1450.12 OS=Schizosaccharomyces pombe (strain 972 / ATCC 24843) GN=SPCC1450.12 PE=1 SV=1	40	4	C	183.825	182.503	257.46
sp|Q9Y7Y6|YOY4_SCHPO	SPBC342.04	Uncharacterized protein C342.04 OS=Schizosaccharomyces pombe (strain 972 / ATCC 24843) GN=SPBC342.04 PE=3 SV=1	640	2	C	64.7021	64.122	146.265
sp|O13722|TAF12_SCHPO	taf12	Transcription initiation factor TFIID subunit 12 OS=Schizosaccharomyces pombe (strain 972 / ATCC 24843) GN=taf12 PE=1 SV=1	859	4	C	174.362	172.744	251.939
sp|Q9P7D7|LCF2_SCHPO	lcf2	Long-chain-fatty-acid--CoA ligase 2 OS=Schizosaccharomyces pombe (strain 972 / ATCC 24843) GN=lcf2 PE=3 SV=1	306	5	C	290.639	287.836	330.453
sp|Q9UTE0|SEY1_SCHPO	sey1	Protein sey1 OS=Schizosaccharomyces pombe (strain 972 / ATCC 24843) GN=sey1 PE=1 SV=1	556	4	C	183.989	182.098	242.395
sp|O94289|LUB1_SCHPO	lub1	Ubiquitin homeostasis protein lub1 OS=Schizosaccharomyces pombe (strain 972 / ATCC 24843) GN=lub1 PE=1 SV=2	1224	3	C	149.917	148.36	201.176
sp|Q9P7J4|MFT1_SCHPO	mft1	THO complex subunit mft1 OS=Schizosaccharomyces pombe (strain 972 / ATCC 24843) GN=mft1 PE=3 SV=1	982	2	C	85.5192	84.6164	102.087
sp|Q9UU81|AP1G1_SCHPO	apl4	AP-1 complex subunit gamma-1 OS=Schizosaccharomyces pombe (strain 972 / ATCC 24843) GN=apl4 PE=3 SV=1	361	5	C	250.565	247.875	275.911
sp|Q9P7S2|RPN6_SCHPO	rpn6	Probable 26S proteasome regulatory subunit rpn6 OS=Schizosaccharomyces pombe (strain 972 / ATCC 24843) GN=rpn6 PE=3 SV=1	288	9	C	450.229	445.32	662.208
sp|Q9P7L1|YOSC_SCHPO	SPBC21C3.12c	Thioredoxin domain-containing protein C21C3.12c OS=Schizosaccharomyces pombe (strain 972 / ATCC 24843) GN=SPBC21C3.12c PE=3 SV=1	1030	2	C	55.1279	54.5261	68.1443
sp|O74469|YQC7_SCHPO	SPCC1739.07	Exosome complex protein C1739.07 OS=Schizosaccharomyces pombe (strain 972 / ATCC 24843) GN=SPCC1739.07 PE=1 SV=1	617	3	C	156.934	155.046	107.627
sp|O74884|RL24B_SCHPO	rpl24b	60S ribosomal protein L24-B OS=Schizosaccharomyces pombe (strain 972 / ATCC 24843) GN=rpl24b PE=1 SV=1	1192	10	C	1466.3	1447.84	675.132
sp|O94625|SPJ1_SCHPO	spj1	DnaJ-related protein spj1 OS=Schizosaccharomyces pombe (strain 972 / ATCC 24843) GN=spj1 PE=2 SV=2	275	5	C	294.663	290.923	278.021
sp|Q9USW5|RS4B_SCHPO	rps4b	40S ribosomal protein S4-B OS=Schizosaccharomyces pombe (strain 972 / ATCC 24843) GN=rps4b PE=1 SV=1	1085	18	C	2174.45	2146.21	1600.51
sp|O43018|YGV4_SCHPO	SPBC354.04	Uncharacterized protein C354.04 OS=Schizosaccharomyces pombe (strain 972 / ATCC 24843) GN=SPBC354.04 PE=4 SV=1	96	4	C	279.906	276.165	392.961
sp|Q10297|IMB5_SCHPO	kap114	Importin subunit beta-5 OS=Schizosaccharomyces pombe (strain 972 / ATCC 24843) GN=kap114 PE=3 SV=3	1173	2	C	115.894	114.276	134.095
sp|O42964|IWS1_SCHPO	iws1	Transcription factor iws1 OS=Schizosaccharomyces pombe (strain 972 / ATCC 24843) GN=iws1 PE=3 SV=1	1259	4	C	115.491	113.689	127.832
sp|P40976|LYS2_SCHPO	lys1	L-aminoadipate-semialdehyde dehydrogenase OS=Schizosaccharomyces pombe (strain 972 / ATCC 24843) GN=lys1 PE=1 SV=3	228	18	C	1114	1095.05	1301.29
sp|Q10289|FAS2_SCHPO	fas2	Fatty acid synthase subunit alpha OS=Schizosaccharomyces pombe (strain 972 / ATCC 24843) GN=fas2 PE=1 SV=2	269	70	C	4948.1	4859.92	4271.54
sp|Q9UT21|YFY7_SCHPO	SPAC9.07c	Uncharacterized GTP-binding protein C9.07c OS=Schizosaccharomyces pombe (strain 972 / ATCC 24843) GN=SPAC9.07c PE=2 SV=1	987	13	C	1042.48	1022.85	972.018
sp|Q9UT00|YKH3_SCHPO	SPAPYUK71.03c	Uncharacterized protein PYUK71.03c OS=Schizosaccharomyces pombe (strain 972 / ATCC 24843) GN=SPAPYUK71.03c PE=1 SV=1	685	10	C	342.531	335.095	441.232
sp|P08094|RLA2_SCHPO	rpp201	60S acidic ribosomal protein P2-alpha OS=Schizosaccharomyces pombe (strain 972 / ATCC 24843) GN=rpp201 PE=1 SV=1	54	7	C	658.18	643.413	508.073
sp|O36033|YLM1_SCHPO	SPAC19B12.01	TPR repeat-containing protein C19B12.01 OS=Schizosaccharomyces pombe (strain 972 / ATCC 24843) GN=SPAC19B12.01 PE=3 SV=2	928	6	C	272.471	266.098	318.849
sp|Q10452|GSK3_SCHPO	gsk3	Protein kinase gsk3 OS=Schizosaccharomyces pombe (strain 972 / ATCC 24843) GN=gsk3 PE=1 SV=3	1385	3	C	84.565	82.5192	131.083
sp|Q9HGL6|BRX1_SCHPO	brx1	Ribosome biogenesis protein brx1 OS=Schizosaccharomyces pombe (strain 972 / ATCC 24843) GN=brx1 PE=3 SV=1	467	10	C	1402.03	1367.39	1220.84
sp|O13787|SEC62_SCHPO	sec62	Translocation protein sec62 OS=Schizosaccharomyces pombe (strain 972 / ATCC 24843) GN=sec62 PE=3 SV=1	564	3	C	199.988	195.036	172.261
sp|O74842|FFT2_SCHPO	fft2	ATP-dependent helicase fft2 OS=Schizosaccharomyces pombe (strain 972 / ATCC 24843) GN=fft2 PE=1 SV=1	347	6	C	204.01	198.775	226.144
sp|P78898|TGCE2_SCHPO	SPBC16A3.12c	Probable lipase C16A3.12c OS=Schizosaccharomyces pombe (strain 972 / ATCC 24843) GN=SPBC16A3.12c PE=3 SV=2	933	2	C	91.454	89.0543	105.4
sp|O94511|YN67_SCHPO	SPBC646.07c	Putative enoyl reductase C646.07c OS=Schizosaccharomyces pombe (strain 972 / ATCC 24843) GN=SPBC646.07c PE=3 SV=1	938	5	C	445.768	433.745	401.664
sp|Q9Y700|EFTU_SCHPO	tuf1	Elongation factor Tu, mitochondrial OS=Schizosaccharomyces pombe (strain 972 / ATCC 24843) GN=tuf1 PE=3 SV=1	505	11	C	932.134	905.829	1011.55
sp|O14325|YB7A_SCHPO	SPBC16E9.10c	Uncharacterized AAA domain-containing protein C16E9.10c OS=Schizosaccharomyces pombe (strain 972 / ATCC 24843) GN=SPBC16E9.10c PE=1 SV=1	329	8	C	452.568	439.479	491.969
sp|Q9UTT2|RSE1_SCHPO	prp12	Pre-mRNA-splicing factor prp12 OS=Schizosaccharomyces pombe (strain 972 / ATCC 24843) GN=prp12 PE=1 SV=1	188	2	C	116.4	113.002	129.694
sp|O59704|ELP1_SCHPO	iki3	Elongator complex protein 1 OS=Schizosaccharomyces pombe (strain 972 / ATCC 24843) GN=iki3 PE=3 SV=1	951	3	C	153.191	148.639	211.259
sp|O74393|MAK5_SCHPO	mak5	ATP-dependent RNA helicase mak5 OS=Schizosaccharomyces pombe (strain 972 / ATCC 24843) GN=mak5 PE=1 SV=1	38	2	C	105.755	102.502	72.8141
sp|Q09903|DRS1_SCHPO	drs1	ATP-dependent RNA helicase drs1 OS=Schizosaccharomyces pombe (strain 972 / ATCC 24843) GN=drs1 PE=3 SV=1	333	8	C	530.625	514.272	366.765
sp|Q09697|RGA8_SCHPO	rga8	Rho-GTPase-activating protein 8 OS=Schizosaccharomyces pombe (strain 972 / ATCC 24843) GN=rga8 PE=1 SV=1	384	2	C	69.7602	67.5857	88.4705
sp|O94462|PUF3_SCHPO	puf3	mRNA-binding protein puf3 OS=Schizosaccharomyces pombe (strain 972 / ATCC 24843) GN=puf3 PE=2 SV=4	1125	2	C	67.5071	65.2998	66.699
sp|Q9UUI5|SEC24_SCHPO	sec24	Protein transport protein sec24 OS=Schizosaccharomyces pombe (strain 972 / ATCC 24843) GN=sec24 PE=2 SV=1	397	8	C	517.907	500.439	736.345
sp|Q10490|SYLC_SCHPO	lrs1	Putative leucine--tRNA ligase, cytoplasmic OS=Schizosaccharomyces pombe (strain 972 / ATCC 24843) GN=lrs1 PE=1 SV=1	183	8	C	340.896	329.182	364.933
sp|O74864|RLA0_SCHPO	rpp0	60S acidic ribosomal protein P0 OS=Schizosaccharomyces pombe (strain 972 / ATCC 24843) GN=rpp0 PE=3 SV=1	1046	25	C	1608.83	1552.3	1291.37
sp|Q10245|MKAR_SCHPO	SPAC4G9.15	Very-long-chain 3-oxoacyl-CoA reductase OS=Schizosaccharomyces pombe (strain 972 / ATCC 24843) GN=SPAC4G9.15 PE=3 SV=1	197	5	C	603.956	582.54	512.643
sp|P07669|TPIS_SCHPO	tpi1	Triosephosphate isomerase OS=Schizosaccharomyces pombe (strain 972 / ATCC 24843) GN=tpi1 PE=1 SV=4	708	9	C	413.467	398.727	744.642
sp|O74503|UAF30_SCHPO	spp27	Upstream activation factor subunit spp27 OS=Schizosaccharomyces pombe (strain 972 / ATCC 24843) GN=spp27 PE=1 SV=1	751	3	C	252.432	243.431	309.295
sp|P19117|IPYR_SCHPO	ppa1	Inorganic pyrophosphatase OS=Schizosaccharomyces pombe (strain 972 / ATCC 24843) GN=ppa1 PE=3 SV=2	896	5	C	478.933	461.686	1087.89
sp|Q9UTR1|MMS19_SCHPO	mms19	DNA repair/transcription protein mms19 OS=Schizosaccharomyces pombe (strain 972 / ATCC 24843) GN=mms19 PE=3 SV=1	1151	5	C	377.631	363.174	424.601
sp|Q9P7V8|MPCP_SCHPO	SPBC1703.13c	Probable mitochondrial phosphate carrier protein OS=Schizosaccharomyces pombe (strain 972 / ATCC 24843) GN=SPBC1703.13c PE=3 SV=1	232	5	C	197.417	189.774	344.519
sp|O14044|PNO1_SCHPO	rbp28	Pre-rRNA-processing protein pno1 OS=Schizosaccharomyces pombe (strain 972 / ATCC 24843) GN=rbp28 PE=1 SV=2	639	4	C	307.534	295.415	262.416
sp|Q9USV4|MEP33_SCHPO	mep33	mRNA export protein 33 OS=Schizosaccharomyces pombe (strain 972 / ATCC 24843) GN=mep33 PE=2 SV=1	7	3	C	278.731	267.511	261.486
sp|O94517|PSA1_SCHPO	SPBC646.16	Probable proteasome subunit alpha type-1 OS=Schizosaccharomyces pombe (strain 972 / ATCC 24843) GN=SPBC646.16 PE=3 SV=1	1256	2	C	127.952	122.494	252.119
sp|O74521|YCPF_SCHPO	SPCC663.15c	Uncharacterized protein C663.15c OS=Schizosaccharomyces pombe (strain 972 / ATCC 24843) GN=SPCC663.15c PE=4 SV=2	557	2	C	120.32	115.166	201.229
sp|Q09803|VPS4_SCHPO	vps4	Suppressor protein of bem1/bed5 double mutants OS=Schizosaccharomyces pombe (strain 972 / ATCC 24843) GN=vps4 PE=3 SV=1	1052	3	C	138.218	132.021	167.326
sp|O14443|GPN3_SCHPO	fet5	GPN-loop GTPase 3 OS=Schizosaccharomyces pombe (strain 972 / ATCC 24843) GN=fet5 PE=2 SV=1	786	2	C	99.9697	95.4811	130.198
sp|Q42598|THRC_SCHPO	thrc	Threonine synthase OS=Schizosaccharomyces pombe (strain 972 / ATCC 24843) GN=thrc PE=1 SV=1	111	5	C	173.694	165.88	393.985
sp|O13808|GMF1_SCHPO	gmf1	Actin-depolymerizing factor gmf1 OS=Schizosaccharomyces pombe (strain 972 / ATCC 24843) GN=gmf1 PE=3 SV=1	812	2	C	86.9859	82.9851	149.371
sp|O43032|SRPR_SCHPO	srp101	Signal recognition particle receptor subunit alpha homolog OS=Schizosaccharomyces pombe (strain 972 / ATCC 24843) GN=srp101 PE=3 SV=1	917	5	C	245.477	233.793	358.68
sp|O94692|RUVB2_SCHPO	rvb2	RuvB-like helicase 2 OS=Schizosaccharomyces pombe (strain 972 / ATCC 24843) GN=rvb2 PE=1 SV=1	316	17	C	1176.84	1120.64	1755.32
sp|Q9UTF7|ELOH1_SCHPO	SPAC1B2.03c	Putative elongation of fatty acids protein 1 OS=Schizosaccharomyces pombe (strain 972 / ATCC 24843) GN=SPAC1B2.03c PE=1 SV=1	107	3	C	174.272	165.882	163.457
sp|P78820|ACAC_SCHPO	cut6	Acetyl-CoA carboxylase OS=Schizosaccharomyces pombe (strain 972 / ATCC 24843) GN=cut6 PE=1 SV=2	214	66	C	4463.56	4241.45	5807
sp|O13637|SEC31_SCHPO	sec31	Protein transport protein sec31 OS=Schizosaccharomyces pombe (strain 972 / ATCC 24843) GN=sec31 PE=1 SV=1	59	18	C	965.068	914.308	1287.44
sp|O13640|YGWH_SCHPO	pi048	Uncharacterized alpha-1,2-galactosyltransferase C8D2.17 OS=Schizosaccharomyces pombe (strain 972 / ATCC 24843) GN=pi048 PE=3 SV=2	587	3	C	294.326	278.669	318.292
sp|Q10284|HSP75_SCHPO	sks2	Heat shock protein sks2 OS=Schizosaccharomyces pombe (strain 972 / ATCC 24843) GN=sks2 PE=1 SV=2	115	35	C	4165.69	3940.73	3814.55
sp|Q10349|SERC_SCHPO	SPAC1F12.07	Putative phosphoserine aminotransferase OS=Schizosaccharomyces pombe (strain 972 / ATCC 24843) GN=SPAC1F12.07 PE=3 SV=1	516	6	C	258.083	243.972	320.242
sp|O13989|YEG7_SCHPO	SPAC26H5.07c	Uncharacterized protein C26H5.07c OS=Schizosaccharomyces pombe (strain 972 / ATCC 24843) GN=SPAC26H5.07c PE=3 SV=2	1275	2	C	80.4548	76.0342	95.5642
sp|P36612|PRS4_SCHPO	mts2	26S protease regulatory subunit 4 homolog OS=Schizosaccharomyces pombe (strain 972 / ATCC 24843) GN=mts2 PE=2 SV=1	284	14	C	1139.07	1074.66	1980.62
sp|P36587|NCPR_SCHPO	ccr1	NADPH--cytochrome P450 reductase OS=Schizosaccharomyces pombe (strain 972 / ATCC 24843) GN=ccr1 PE=2 SV=1	477	9	C	531.761	501.144	750.263
sp|P24782|DBP2_SCHPO	dbp2	ATP-dependent RNA helicase dbp2 OS=Schizosaccharomyces pombe (strain 972 / ATCC 24843) GN=dbp2 PE=2 SV=2	256	24	C	1788.77	1685.29	1961.67
sp|P87027|SPG1_SCHPO	spg1	Septum-promoting GTP-binding protein 1 OS=Schizosaccharomyces pombe (strain 972 / ATCC 24843) GN=spg1 PE=1 SV=1	910	2	C	151.007	142.269	125.894
sp|P37202|DIS3_SCHPO	dis3	Exosome complex exonuclease dis3 OS=Schizosaccharomyces pombe (strain 972 / ATCC 24843) GN=dis3 PE=1 SV=1	883	3	C	212.181	199.521	233.746
sp|O94563|YGD4_SCHPO	SPBC1773.04	Putative uncharacterized oxidoreductase C1773.04 OS=Schizosaccharomyces pombe (strain 972 / ATCC 24843) GN=SPBC1773.04 PE=1 SV=1	632	3	C	93.5857	87.8905	122.51
sp|Q9P3U0|UBP2_SCHPO	ubp2	Probable ubiquitin carboxyl-terminal hydrolase 2 OS=Schizosaccharomyces pombe (strain 972 / ATCC 24843) GN=ubp2 PE=1 SV=1	140	5	C	260.159	244.249	340.279
sp|O74536|SNF1_SCHPO	ssp2	SNF1-like protein kinase ssp2 OS=Schizosaccharomyces pombe (strain 972 / ATCC 24843) GN=ssp2 PE=1 SV=1	748	4	C	177.68	166.803	238.593
sp|Q9P7F8|GET3_SCHPO	get3	ATPase get3 OS=Schizosaccharomyces pombe (strain 972 / ATCC 24843) GN=get3 PE=1 SV=1	440	7	C	200.387	188.026	270.215
sp|O13739|CHMU_SCHPO	SPAC16E8.04c	Probable chorismate mutase OS=Schizosaccharomyces pombe (strain 972 / ATCC 24843) GN=SPAC16E8.04c PE=3 SV=1	1371	2	C	44.0563	41.2945	73.8332
sp|O94715|RS15A_SCHPO	rps15a	40S ribosomal protein S15-A OS=Schizosaccharomyces pombe (strain 972 / ATCC 24843) GN=rps15a PE=3 SV=1	1201	10	C	765.965	717.8	516.201
sp|O60080|DBP9_SCHPO	dbp9	ATP-dependent RNA helicase dbp9 OS=Schizosaccharomyces pombe (strain 972 / ATCC 24843) GN=dbp9 PE=3 SV=1	600	6	C	478.386	448.007	576.679
sp|O74803|RHP23_SCHPO	rhp23	UV excision repair protein rhp23 OS=Schizosaccharomyces pombe (strain 972 / ATCC 24843) GN=rhp23 PE=1 SV=1	577	2	C	76.1639	71.2828	121.791
sp|Q9P7V2|ABC4_SCHPO	abc4	ATP-binding cassette transporter abc4 OS=Schizosaccharomyces pombe (strain 972 / ATCC 24843) GN=abc4 PE=3 SV=1	774	6	C	293.535	274.588	350.272
sp|O14206|YDD3_SCHPO	SPAC1B9.03c	Brix domain-containing protein C1B9.03c OS=Schizosaccharomyces pombe (strain 972 / ATCC 24843) GN=SPAC1B9.03c PE=1 SV=2	108	3	C	183.366	171.522	96.3992
sp|Q9USH8|GLU2B_SCHPO	gtb1	Glucosidase 2 subunit beta OS=Schizosaccharomyces pombe (strain 972 / ATCC 24843) GN=gtb1 PE=1 SV=1	730	3	C	155.618	145.518	223.418
sp|P31411|VATB_SCHPO	vma2	V-type proton ATPase subunit B OS=Schizosaccharomyces pombe (strain 972 / ATCC 24843) GN=vma2 PE=1 SV=2	674	17	C	586.944	548.293	586.48
sp|Q09179|GLNA_SCHPO	gln1	Glutamine synthetase OS=Schizosaccharomyces pombe (strain 972 / ATCC 24843) GN=gln1 PE=1 SV=2	303	2	C	94.2411	88.0308	207.138
sp|O94489|EF3_SCHPO	tef3	Elongation factor 3 OS=Schizosaccharomyces pombe (strain 972 / ATCC 24843) GN=tef3 PE=1 SV=1	247	57	C	5341.14	4987.19	5734.24
sp|Q9USM1|ADRM1_SCHPO	SPCC16A11.16c	Probable proteasomal ubiquitin receptor ADRM1 homolog OS=Schizosaccharomyces pombe (strain 972 / ATCC 24843) GN=SPCC16A11.16c PE=3 SV=1	1043	3	C	229.227	214.026	395.821
sp|O94667|RTF1_SCHPO	SPBC651.09c	RNA polymerase-associated protein C651.09c OS=Schizosaccharomyces pombe (strain 972 / ATCC 24843) GN=SPBC651.09c PE=1 SV=1	770	5	C	248.572	231.995	292.28
sp|Q01475|SAR1_SCHPO	sar1	Small COPII coat GTPase sar1 OS=Schizosaccharomyces pombe (strain 972 / ATCC 24843) GN=sar1 PE=1 SV=1	44	9	C	526.818	490.786	796.715
sp|O13810|PROB_SCHPO	SPAC17H9.13c	Probable glutamate 5-kinase OS=Schizosaccharomyces pombe (strain 972 / ATCC 24843) GN=SPAC17H9.13c PE=3 SV=1	414	4	C	429.601	399.851	340.352
sp|Q9HE05|UFD2_SCHPO	ufd2	Ubiquitin conjugation factor E4 OS=Schizosaccharomyces pombe (strain 972 / ATCC 24843) GN=ufd2 PE=2 SV=1	501	4	C	134.788	125.155	178.6
sp|P54874|HMCS_SCHPO	hcs1	Hydroxymethylglutaryl-CoA synthase OS=Schizosaccharomyces pombe (strain 972 / ATCC 24843) GN=hcs1 PE=1 SV=1	1404	2	C	77.3814	71.8008	179.946
sp|P08096|TOP2_SCHPO	top2	DNA topoisomerase 2 OS=Schizosaccharomyces pombe (strain 972 / ATCC 24843) GN=top2 PE=1 SV=2	287	6	C	397.5	368.274	394.978
sp|Q09713|YA36_SCHPO	SPAC18B11.06	Uncharacterized protein C18B11.06 OS=Schizosaccharomyces pombe (strain 972 / ATCC 24843) GN=SPAC18B11.06 PE=1 SV=1	437	4	C	477.486	442.253	297.507
sp|Q9UTN3|CID14_SCHPO	cid14	Poly(A) RNA polymerase cid14 OS=Schizosaccharomyces pombe (strain 972 / ATCC 24843) GN=cid14 PE=1 SV=2	109	5	C	323.812	299.633	219.922
sp|O74442|UBP16_SCHPO	ubp16	Probable ubiquitin carboxyl-terminal hydrolase 16 OS=Schizosaccharomyces pombe (strain 972 / ATCC 24843) GN=ubp16 PE=1 SV=1	1453	2	C	129.968	120.185	123.777
sp|O14003|RFC3_SCHPO	rfc3	Replication factor C subunit 3 OS=Schizosaccharomyces pombe (strain 972 / ATCC 24843) GN=rfc3 PE=1 SV=2	417	3	C	172.336	159.178	194.653
sp|Q9UUH3|MUG58_SCHPO	mug58	Uncharacterized kinase mug58 OS=Schizosaccharomyces pombe (strain 972 / ATCC 24843) GN=mug58 PE=1 SV=1	1134	2	C	40.9069	37.7652	58.5752
sp|P87048|RPN1_SCHPO	rpn1	26S proteasome regulatory subunit rpn1 OS=Schizosaccharomyces pombe (strain 972 / ATCC 24843) GN=rpn1 PE=1 SV=2	226	23	C	1778.95	1641.33	3022.54
sp|Q9USS7|YNB3_SCHPO	SPBC4.03c	Uncharacterized protein C4.03c OS=Schizosaccharomyces pombe (strain 972 / ATCC 24843) GN=SPBC4.03c PE=2 SV=1	947	4	C	182.773	168.62	206.398
sp|O74476|IMB3_SCHPO	sal3	Importin subunit beta-3 OS=Schizosaccharomyces pombe (strain 972 / ATCC 24843) GN=sal3 PE=3 SV=1	611	12	C	620.089	571.723	651.009
sp|Q9P6K3|YLF8_SCHPO	SPAC30C2.08	UPF0662 protein C30C2.08 OS=Schizosaccharomyces pombe (strain 972 / ATCC 24843) GN=SPAC30C2.08 PE=3 SV=1	514	6	C	192.126	177.085	264.799
sp|Q9P7H3|PHB1_SCHPO	phb1	Prohibitin-1 OS=Schizosaccharomyces pombe (strain 972 / ATCC 24843) GN=phb1 PE=3 SV=1	146	8	C	806.638	742.42	636.71
sp|O74557|NCB5R_SCHPO	cbr1	NADH-cytochrome b5 reductase 1 OS=Schizosaccharomyces pombe (strain 972 / ATCC 24843) GN=cbr1 PE=3 SV=1	278	9	C	640.44	588.851	637.269
sp|Q9Y7L8|RSSA1_SCHPO	rps0a	40S ribosomal protein S0-A OS=Schizosaccharomyces pombe (strain 972 / ATCC 24843) GN=rps0a PE=1 SV=1	787	9	C	827.027	759.564	536.842
sp|Q9UTJ7|SDHA_SCHPO	sdh1	Probable succinate dehydrogenase [ubiquinone] flavoprotein subunit, mitochondrial OS=Schizosaccharomyces pombe (strain 972 / ATCC 24843) GN=sdh1 PE=2 SV=1	428	7	C	365.186	334.967	527.24
sp|O13685|UBC13_SCHPO	ubc13	Ubiquitin-conjugating enzyme E2 13 OS=Schizosaccharomyces pombe (strain 972 / ATCC 24843) GN=ubc13 PE=1 SV=1	866	4	C	138.041	126.614	207.675
sp|O13620|MRD1_SCHPO	mrd1	Multiple RNA-binding domain-containing protein 1 OS=Schizosaccharomyces pombe (strain 972 / ATCC 24843) GN=mrd1 PE=3 SV=1	889	7	C	907.491	831.284	876.85
sp|P15398|RPA1_SCHPO	rpa1	DNA-directed RNA polymerase I subunit rpa1 OS=Schizosaccharomyces pombe (strain 972 / ATCC 24843) GN=rpa1 PE=1 SV=2	482	13	C	965.175	883.769	1144.46
sp|Q9UUE6|SYKC_SCHPO	krs1	Lysine--tRNA ligase, cytoplasmic OS=Schizosaccharomyces pombe (strain 972 / ATCC 24843) GN=krs1 PE=3 SV=1	64	8	C	895.8	819.487	1151.49
sp|Q9USP0|EI2BA_SCHPO	tif221	Translation initiation factor eIF-2B subunit alpha OS=Schizosaccharomyces pombe (strain 972 / ATCC 24843) GN=tif221 PE=3 SV=1	1239	9	C	459.458	419.978	483.613
sp|Q9P782|YNY8_SCHPO	SPBC1711.08	Uncharacterized protein C1711.08 OS=Schizosaccharomyces pombe (strain 972 / ATCC 24843) GN=SPBC1711.08 PE=2 SV=1	1119	9	C	828.582	757.339	889.692
sp|Q10428|2AD1_SCHPO	par1	Serine/threonine-protein phosphatase 2A 56 kDa regulatory subunit delta 1 isoform OS=Schizosaccharomyces pombe (strain 972 / ATCC 24843) GN=par1 PE=1 SV=1	1334	2	C	294.792	269.328	294.009
sp|P56288|EI2BG_SCHPO	tif223	Probable translation initiation factor eIF-2B subunit gamma OS=Schizosaccharomyces pombe (strain 972 / ATCC 24843) GN=tif223 PE=1 SV=2	447	9	C	764.932	698.099	777.043
sp|Q9UQW6|THIL_SCHPO	erg10	Acetyl-CoA acetyltransferase OS=Schizosaccharomyces pombe (strain 972 / ATCC 24843) GN=erg10 PE=2 SV=1	182	3	C	199.624	182.09	523.102
sp|Q02787|PURA_SCHPO	ade2	Adenylosuccinate synthetase OS=Schizosaccharomyces pombe (strain 972 / ATCC 24843) GN=ade2 PE=1 SV=2	90	4	C	206.848	188.6	396.564
sp|O74552|VPS35_SCHPO	vps35	Vacuolar protein sorting-associated protein 35 OS=Schizosaccharomyces pombe (strain 972 / ATCC 24843) GN=vps35 PE=1 SV=2	1205	3	C	436.928	398.381	382.604
sp|O14062|RS12A_SCHPO	rps12a	40S ribosomal protein S12-A OS=Schizosaccharomyces pombe (strain 972 / ATCC 24843) GN=rps12a PE=3 SV=1	413	6	C	731.421	665.833	596.534
sp|P87127|ATP11_SCHPO	atp11	Protein atp11, mitochondrial OS=Schizosaccharomyces pombe (strain 972 / ATCC 24843) GN=atp11 PE=3 SV=1	1458	3	C	127.397	115.868	179.065
sp|Q9UUG0|FAS1_SCHPO	fas1	Fatty acid synthase subunit beta OS=Schizosaccharomyces pombe (strain 972 / ATCC 24843) GN=fas1 PE=1 SV=1	238	65	C	4451.1	4043.6	3975.23
sp|O74341|TCPG_SCHPO	cct3	T-complex protein 1 subunit gamma OS=Schizosaccharomyces pombe (strain 972 / ATCC 24843) GN=cct3 PE=1 SV=1	441	17	C	1573.77	1427.17	2432.63
sp|O14126|PRS6A_SCHPO	tbp1	26S protease regulatory subunit 6A OS=Schizosaccharomyces pombe (strain 972 / ATCC 24843) GN=tbp1 PE=3 SV=1	420	16	C	1105.08	999.991	1676.17
sp|O59701|CYSK1_SCHPO	cys11	Cysteine synthase 1 OS=Schizosaccharomyces pombe (strain 972 / ATCC 24843) GN=cys11 PE=3 SV=1	142	2	C	71.5123	64.6498	117.605
sp|O94449|RFC4_SCHPO	rfc4	Replication factor C subunit 4 OS=Schizosaccharomyces pombe (strain 972 / ATCC 24843) GN=rfc4 PE=1 SV=1	955	4	C	288.541	260.743	313.386
sp|O13827|YEEB_SCHPO	SPAC19A8.11c	Uncharacterized protein C19A8.11c OS=Schizosaccharomyces pombe (strain 972 / ATCC 24843) GN=SPAC19A8.11c PE=1 SV=1	642	4	C	215.642	194.709	226.652
sp|Q10283|HMDH_SCHPO	hmg1	3-hydroxy-3-methylglutaryl-coenzyme A reductase OS=Schizosaccharomyces pombe (strain 972 / ATCC 24843) GN=hmg1 PE=1 SV=2	322	6	C	471.233	425.337	483.748
sp|O74760|EIF3A_SCHPO	tif32	Eukaryotic translation initiation factor 3 subunit A OS=Schizosaccharomyces pombe (strain 972 / ATCC 24843) GN=tif32 PE=1 SV=1	177	27	C	2984.94	2693.94	2929.99
sp|O94340|YHM7_SCHPO	SPBC1271.07c	Uncharacterized N-acetyltransferase C1271.07c OS=Schizosaccharomyces pombe (strain 972 / ATCC 24843) GN=SPBC1271.07c PE=3 SV=1	967	2	C	175.656	158.518	109.009
sp|Q9UUF7|COPB_SCHPO	sec26	Coatomer subunit beta OS=Schizosaccharomyces pombe (strain 972 / ATCC 24843) GN=sec26 PE=3 SV=1	211	14	C	914.867	825.423	1053.61
sp|Q8WZJ7|C1TC_SCHPO	SPBC839.16	C-1-tetrahydrofolate synthase, cytoplasmic OS=Schizosaccharomyces pombe (strain 972 / ATCC 24843) GN=SPBC839.16 PE=3 SV=1	693	4	C	240.806	217.122	286.736
sp|Q09915|SPT6_SCHPO	spt6	Transcription elongation factor spt6 OS=Schizosaccharomyces pombe (strain 972 / ATCC 24843) GN=spt6 PE=1 SV=2	795	5	C	370.706	333.737	368.53
sp|Q9UT11|YLW3_SCHPO	SPAP8A3.03	Uncharacterized zinc transporter P8A3.03 OS=Schizosaccharomyces pombe (strain 972 / ATCC 24843) GN=SPAP8A3.03 PE=3 SV=1	1250	3	C	157.542	141.787	164.2
sp|O14121|NDH1_SCHPO	SPAC3A11.07	Probable NADH-ubiquinone oxidoreductase C3A11.07, mitochondrial OS=Schizosaccharomyces pombe (strain 972 / ATCC 24843) GN=SPAC3A11.07 PE=3 SV=1	285	5	C	217.496	195.495	486.51
sp|O94260|G3BP_SCHPO	nxt3	Putative G3BP-like protein OS=Schizosaccharomyces pombe (strain 972 / ATCC 24843) GN=nxt3 PE=1 SV=1	662	8	C	738.309	663.469	540.052
sp|O74893|RS20_SCHPO	rps20	40S ribosomal protein S20 OS=Schizosaccharomyces pombe (strain 972 / ATCC 24843) GN=rps20 PE=1 SV=1	1018	5	C	396.551	355.997	305.855
sp|O94375|REXO4_SCHPO	rex4	RNA exonuclease 4 OS=Schizosaccharomyces pombe (strain 972 / ATCC 24843) GN=rex4 PE=3 SV=1	1003	4	C	187.878	168.639	255.614
sp|O74752|MAS5_SCHPO	mas5	Mitochondrial protein import protein mas5 OS=Schizosaccharomyces pombe (strain 972 / ATCC 24843) GN=mas5 PE=3 SV=1	421	19	C	1938.16	1738.55	2745.83
sp|Q96WW6|ALG2_SCHPO	alg2	Alpha-1,3/1,6-mannosyltransferase alg2 OS=Schizosaccharomyces pombe (strain 972 / ATCC 24843) GN=alg2 PE=3 SV=2	624	3	C	144.883	129.88	155.375
sp|P78831|GHT5_SCHPO	ght5	High-affinity glucose transporter ght5 OS=Schizosaccharomyces pombe (strain 972 / ATCC 24843) GN=ght5 PE=1 SV=2	345	2	C	154.737	138.692	193.227
sp|O94316|SN114_SCHPO	cwf10	Pre-mRNA-splicing factor cwf10 OS=Schizosaccharomyces pombe (strain 972 / ATCC 24843) GN=cwf10 PE=1 SV=2	200	5	C	286.405	256.685	350.073
sp|O13791|SLT1_SCHPO	slt1	Protein slt1 OS=Schizosaccharomyces pombe (strain 972 / ATCC 24843) GN=slt1 PE=1 SV=3	1157	10	C	1011.84	906.615	1585.63
sp|O74445|PRS10_SCHPO	rpt4	Probable 26S protease subunit rpt4 OS=Schizosaccharomyces pombe (strain 972 / ATCC 24843) GN=rpt4 PE=3 SV=2	284	12	C	841.815	754.267	1246.75
sp|O74790|GLRX4_SCHPO	grx4	Monothiol glutaredoxin-4 OS=Schizosaccharomyces pombe (strain 972 / ATCC 24843) GN=grx4 PE=1 SV=1	32	6	C	363.474	325.048	362.103
sp|P31209|PABP_SCHPO	pab1	Polyadenylate-binding protein, cytoplasmic and nuclear OS=Schizosaccharomyces pombe (strain 972 / ATCC 24843) GN=pab1 PE=1 SV=2	143	29	C	3063.73	2737.8	2151.8
sp|O13656|TOM40_SCHPO	tom40	Probable mitochondrial import receptor subunit tom40 OS=Schizosaccharomyces pombe (strain 972 / ATCC 24843) GN=tom40 PE=3 SV=3	424	4	C	168.472	150.491	174.879
sp|G2TRQ9|TAM10_SCHPO	tam10	Uncharacterized protein tam10 OS=Schizosaccharomyces pombe (strain 972 / ATCC 24843) GN=tam10 PE=1 SV=1	1498	3	C	266.13	237.528	220.597
sp|O74191|FKBP4_SCHPO	fkbp39	FK506-binding protein 39 kDa OS=Schizosaccharomyces pombe (strain 972 / ATCC 24843) GN=fkbp39 PE=1 SV=1	666	16	C	1806.29	1611.34	1537.53
sp|Q02061|RPB2_SCHPO	rpb2	DNA-directed RNA polymerase II subunit RPB2 OS=Schizosaccharomyces pombe (strain 972 / ATCC 24843) GN=rpb2 PE=1 SV=2	60	9	C	794.559	708.285	989.917
sp|O60102|RLI1_SCHPO	rli1	Translation initiation factor rli1 OS=Schizosaccharomyces pombe (strain 972 / ATCC 24843) GN=rli1 PE=3 SV=1	117	16	C	1339.03	1192.47	1334.38
sp|P41836|PRS8_SCHPO	let1	26S protease regulatory subunit 8 homolog OS=Schizosaccharomyces pombe (strain 972 / ATCC 24843) GN=let1 PE=3 SV=1	284	15	C	1057.44	941.571	1740.4
sp|P41838|RAE1_SCHPO	rae1	Poly(A)+ RNA export protein OS=Schizosaccharomyces pombe (strain 972 / ATCC 24843) GN=rae1 PE=1 SV=1	1165	2	C	91.3256	81.3118	106.588
sp|O13936|SPT5_SCHPO	spt5	Transcription elongation factor spt5 OS=Schizosaccharomyces pombe (strain 972 / ATCC 24843) GN=spt5 PE=1 SV=1	419	7	C	414.177	368.736	406.807
sp|Q10175|FKBPH_SCHPO	SPAC27F1.06c	Probable peptidyl-prolyl cis-trans isomerase C27F1.06c OS=Schizosaccharomyces pombe (strain 972 / ATCC 24843) GN=SPAC27F1.06c PE=1 SV=1	931	8	C	519.668	462.633	478.287
sp|O13696|IDH1_SCHPO	idh1	Isocitrate dehydrogenase [NAD] subunit 1, mitochondrial OS=Schizosaccharomyces pombe (strain 972 / ATCC 24843) GN=idh1 PE=1 SV=1	1190	5	C	343.411	305.623	445.696
sp|O60071|YBB9_SCHPO	SPBC13G1.09	Uncharacterized protein C13G1.09 OS=Schizosaccharomyces pombe (strain 972 / ATCC 24843) GN=SPBC13G1.09 PE=1 SV=1	1117	2	C	91.8916	81.7383	83.0836
sp|O13809|YE0C_SCHPO	SPAC17H9.12c	Uncharacterized FAD-binding protein C17H9.12c OS=Schizosaccharomyces pombe (strain 972 / ATCC 24843) GN=SPAC17H9.12c PE=3 SV=1	941	4	C	208.128	184.915	310.846
sp|O42933|PMT4_SCHPO	ogm4	Dolichyl-phosphate-mannose--protein mannosyltransferase 4 OS=Schizosaccharomyces pombe (strain 972 / ATCC 24843) GN=ogm4 PE=3 SV=1	1013	3	C	249.725	221.654	531.385
sp|P36580|ALF_SCHPO	fba1	Fructose-bisphosphate aldolase OS=Schizosaccharomyces pombe (strain 972 / ATCC 24843) GN=fba1 PE=1 SV=2	510	14	C	843.287	748.453	2242.24
sp|Q10233|RPC2_SCHPO	rpc2	DNA-directed RNA polymerase III subunit RPC2 OS=Schizosaccharomyces pombe (strain 972 / ATCC 24843) GN=rpc2 PE=2 SV=1	459	4	C	243.335	215.701	261.408
sp|O60182|RFC1_SCHPO	rfc1	Replication factor C subunit 1 OS=Schizosaccharomyces pombe (strain 972 / ATCC 24843) GN=rfc1 PE=1 SV=1	590	4	C	265.426	234.947	289.465
sp|Q09845|GPD2_SCHPO	gpd2	Glycerol-3-phosphate dehydrogenase [NAD(+)] 2 OS=Schizosaccharomyces pombe (strain 972 / ATCC 24843) GN=gpd2 PE=1 SV=1	900	6	C	252.875	223.82	230.523
sp|O13636|TIM50_SCHPO	tim50	Mitochondrial import inner membrane translocase subunit tim50 OS=Schizosaccharomyces pombe (strain 972 / ATCC 24843) GN=tim50 PE=3 SV=1	760	5	C	208.643	184.619	271.975
sp|O74351|NFS1_SCHPO	SPBC21D10.11c	Probable cysteine desulfurase, mitochondrial OS=Schizosaccharomyces pombe (strain 972 / ATCC 24843) GN=SPBC21D10.11c PE=3 SV=2	1143	4	C	186.261	164.668	218.346
sp|P56286|IF2A_SCHPO	tif211	Eukaryotic translation initiation factor 2 subunit alpha OS=Schizosaccharomyces pombe (strain 972 / ATCC 24843) GN=tif211 PE=1 SV=1	14	19	C	2012.29	1778.83	2225.84
sp|O43036|RPA43_SCHPO	rpa43	DNA-directed RNA polymerase I subunit rpa43 OS=Schizosaccharomyces pombe (strain 972 / ATCC 24843) GN=rpa43 PE=1 SV=1	738	3	C	154.802	136.726	164.058
sp|O42885|YBN1_SCHPO	SPBC8E4.01c	Putative inorganic phosphate transporter C8E4.01c OS=Schizosaccharomyces pombe (strain 972 / ATCC 24843) GN=SPBC8E4.01c PE=1 SV=2	185	6	C	444.13	392.057	504.336
sp|Q9P546|RSSA2_SCHPO	rps0b	40S ribosomal protein S0-B OS=Schizosaccharomyces pombe (strain 972 / ATCC 24843) GN=rps0b PE=1 SV=1	787	17	C	1436.16	1267.55	998.184
sp|O59706|SAP61_SCHPO	sap61	Pre-mRNA-splicing factor sap61 OS=Schizosaccharomyces pombe (strain 972 / ATCC 24843) GN=sap61 PE=1 SV=1	1352	2	C	169.202	149.336	170.106
sp|P87228|SERA_SCHPO	SPCC364.07	Putative D-3-phosphoglycerate dehydrogenase OS=Schizosaccharomyces pombe (strain 972 / ATCC 24843) GN=SPCC364.07 PE=1 SV=1	660	2	C	87.5342	77.2382	125.611
sp|P87317|YB2G_SCHPO	SPBC31F10.16	Uncharacterized protein C31F10.16 OS=Schizosaccharomyces pombe (strain 972 / ATCC 24843) GN=SPBC31F10.16 PE=4 SV=2	281	8	C	398.2	351.234	488.151
sp|O14027|PDX1_SCHPO	snz1	Probable pyridoxal 5'-phosphate synthase subunit PDX1 OS=Schizosaccharomyces pombe (strain 972 / ATCC 24843) GN=snz1 PE=1 SV=1	246	5	C	323.532	285.273	632.034
sp|O94616|RPAC1_SCHPO	rpc40	DNA-directed RNA polymerases I and III subunit RPAC1 OS=Schizosaccharomyces pombe (strain 972 / ATCC 24843) GN=rpc40 PE=3 SV=1	1138	5	C	270.757	238.262	308.286
sp|Q9C0X8|RRP12_SCHPO	SPAPB8E5.07c	Putative ribosomal RNA-processing protein 12 OS=Schizosaccharomyces pombe (strain 972 / ATCC 24843) GN=SPAPB8E5.07c PE=3 SV=1	410	7	C	250.009	219.951	279.846
sp|Q9UTD3|YIP5_SCHPO	yip5	Protein YIP5 OS=Schizosaccharomyces pombe (strain 972 / ATCC 24843) GN=yip5 PE=3 SV=1	813	2	C	61.5928	54.1566	104.136
sp|O14351|YB45_SCHPO	SPBC30D10.05c	Uncharacterized oxidoreductase C30D10.05c OS=Schizosaccharomyces pombe (strain 972 / ATCC 24843) GN=SPBC30D10.05c PE=3 SV=1	393	6	C	107.64	94.5852	199.634
sp|P15567|PUR6_SCHPO	ade6	Phosphoribosylaminoimidazole carboxylase OS=Schizosaccharomyces pombe (strain 972 / ATCC 24843) GN=ade6 PE=3 SV=1	260	9	C	593.545	521.272	862
sp|Q9USQ4|SIM3_SCHPO	sim3	NASP-related protein sim3 OS=Schizosaccharomyces pombe (strain 972 / ATCC 24843) GN=sim3 PE=1 SV=1	820	2	C	81.8665	71.8749	89.7968
sp|O74504|YJD1_SCHPO	SPCC594.01	UPF0590 protein C594.01 OS=Schizosaccharomyces pombe (strain 972 / ATCC 24843) GN=SPCC594.01 PE=1 SV=2	1562	3	C	92.9141	81.3252	116.115
sp|P22068|ATPB_SCHPO	atp2	ATP synthase subunit beta, mitochondrial OS=Schizosaccharomyces pombe (strain 972 / ATCC 24843) GN=atp2 PE=1 SV=1	953	9	C	572.233	500.571	986.891
sp|Q9P544|VDAC_SCHPO	SPAC1635.01	Probable mitochondrial outer membrane protein porin OS=Schizosaccharomyces pombe (strain 972 / ATCC 24843) GN=SPAC1635.01 PE=3 SV=1	249	9	C	372.716	325.943	485.277
sp|O13774|GCH1_SCHPO	SPAC17A5.13	GTP cyclohydrolase 1 OS=Schizosaccharomyces pombe (strain 972 / ATCC 24843) GN=SPAC17A5.13 PE=1 SV=1	1298	2	C	113.378	99.1098	98.6922
sp|O13651|SYIC_SCHPO	irs1	Isoleucine--tRNA ligase, cytoplasmic OS=Schizosaccharomyces pombe (strain 972 / ATCC 24843) GN=irs1 PE=3 SV=1	385	9	C	502.226	438.944	798.449
sp|P78795|EIF3G_SCHPO	tif35	Eukaryotic translation initiation factor 3 subunit G OS=Schizosaccharomyces pombe (strain 972 / ATCC 24843) GN=tif35 PE=1 SV=2	922	15	C	1688.73	1475.94	1670.94
sp|Q8WZK0|US107_SCHPO	usp107	U1 snRNP-associated protein usp107 OS=Schizosaccharomyces pombe (strain 972 / ATCC 24843) GN=usp107 PE=1 SV=1	132	2	C	109.879	95.7342	82.2888
sp|P47943|IF4A_SCHPO	tif1	ATP-dependent RNA helicase eIF4A OS=Schizosaccharomyces pombe (strain 972 / ATCC 24843) GN=tif1 PE=1 SV=2	321	26	C	847.224	736.948	1098.2
sp|Q9USP9|YHP4_SCHPO	SPBC902.04	Uncharacterized RNA-binding protein C902.04 OS=Schizosaccharomyces pombe (strain 972 / ATCC 24843) GN=SPBC902.04 PE=1 SV=1	977	2	C	69.9425	60.799	92.831
sp|Q92462|PUB1_SCHPO	pub1	E3 ubiquitin-protein ligase pub1 OS=Schizosaccharomyces pombe (strain 972 / ATCC 24843) GN=pub1 PE=1 SV=2	755	4	C	338.897	293.677	301.509
sp|O59725|MIC60_SCHPO	mic60	MICOS complex subunit mic60 OS=Schizosaccharomyces pombe (strain 972 / ATCC 24843) GN=mic60 PE=3 SV=1	375	9	C	347.383	300.484	563.699
sp|P36581|CALX_SCHPO	cal1	Calnexin homolog OS=Schizosaccharomyces pombe (strain 972 / ATCC 24843) GN=cal1 PE=1 SV=1	465	10	C	582.374	503.516	734.52
sp|O59866|OSTB_SCHPO	wbp1	Dolichyl-diphosphooligosaccharide--protein glycosyltransferase subunit wbp1 OS=Schizosaccharomyces pombe (strain 972 / ATCC 24843) GN=wbp1 PE=2 SV=2	670	9	C	671.446	580.324	600.505
sp|O13892|YE38_SCHPO	SPAC20G4.08	Uncharacterized protein C20G4.08 OS=Schizosaccharomyces pombe (strain 972 / ATCC 24843) GN=SPAC20G4.08 PE=1 SV=2	1555	2	C	87.3113	75.4043	96.1953
sp|Q10138|YAS2_SCHPO	SPAC3H8.02	CRAL-TRIO domain-containing protein C3H8.02 OS=Schizosaccharomyces pombe (strain 972 / ATCC 24843) GN=SPAC3H8.02 PE=1 SV=1	758	5	C	351.619	303.633	500.909
sp|Q9UU78|RLA5_SCHPO	rpa5	60S acidic ribosomal protein P1-alpha 5 OS=Schizosaccharomyces pombe (strain 972 / ATCC 24843) GN=rpa5 PE=1 SV=1	54	4	C	778.355	671.979	470.097
sp|P79009|RS25A_SCHPO	rps25a	40S ribosomal protein S25-A OS=Schizosaccharomyces pombe (strain 972 / ATCC 24843) GN=rps25a PE=3 SV=2	1107	2	C	101.012	86.9799	110.963
sp|O94550|PHB2_SCHPO	phb2	Prohibitin-2 OS=Schizosaccharomyces pombe (strain 972 / ATCC 24843) GN=phb2 PE=1 SV=2	62	5	C	454.581	390.582	440.856
sp|O13831|TRP_SCHPO	trp2	Tryptophan synthase OS=Schizosaccharomyces pombe (strain 972 / ATCC 24843) GN=trp2 PE=2 SV=1	860	18	C	1296.19	1113.34	1352.06
sp|P79063|ERF1_SCHPO	sup45	Eukaryotic peptide chain release factor subunit 1 OS=Schizosaccharomyces pombe (strain 972 / ATCC 24843) GN=sup45 PE=1 SV=1	821	10	C	832.934	714.863	698.645
sp|O74362|ESF2_SCHPO	esf2	Pre-rRNA-processing protein esf2 OS=Schizosaccharomyces pombe (strain 972 / ATCC 24843) GN=esf2 PE=1 SV=1	1338	2	C	194.562	166.884	129.161
sp|Q9HEQ9|TCG1_SCHPO	tcg1	Single-stranded TG1-3 DNA-binding protein OS=Schizosaccharomyces pombe (strain 972 / ATCC 24843) GN=tcg1 PE=1 SV=3	296	19	C	2384.11	2043.57	1262.21
sp|Q09794|PYR1_SCHPO	ura1	Protein ura1 OS=Schizosaccharomyces pombe (strain 972 / ATCC 24843) GN=ura1 PE=1 SV=1	155	76	C	5756.72	4912.75	6527.18
sp|Q9UTE3|SEB1_SCHPO	seb1	Rpb7-binding protein seb1 OS=Schizosaccharomyces pombe (strain 972 / ATCC 24843) GN=seb1 PE=1 SV=3	24	2	C	111.59	95.2017	140.775
sp|P36591|DYR_SCHPO	dfr1	Dihydrofolate reductase OS=Schizosaccharomyces pombe (strain 972 / ATCC 24843) GN=dfr1 PE=2 SV=2	151	15	C	1361.85	1161.59	1461.84
sp|O94620|CWF17_SCHPO	cwf17	Pre-mRNA-splicing factor cwf17 OS=Schizosaccharomyces pombe (strain 972 / ATCC 24843) GN=cwf17 PE=1 SV=1	711	3	C	116.949	99.7348	83.0849
sp|Q9US07|ARP8_SCHPO	SPAC664.02c	Probable actin-related protein 8 OS=Schizosaccharomyces pombe (strain 972 / ATCC 24843) GN=SPAC664.02c PE=1 SV=2	1366	3	C	118.332	100.904	108.045
sp|O13811|PDI2_SCHPO	SPAC17H9.14c	Protein disulfide-isomerase C17H9.14c OS=Schizosaccharomyces pombe (strain 972 / ATCC 24843) GN=SPAC17H9.14c PE=3 SV=1	729	12	C	839.064	715.016	1081.71
sp|O42940|PHO88_SCHPO	pho88	Inorganic phosphate transport protein pho88 OS=Schizosaccharomyces pombe (strain 972 / ATCC 24843) GN=pho88 PE=3 SV=2	1199	4	C	259.054	220.685	286.179
sp|P21911|SDHB_SCHPO	sdh2	Succinate dehydrogenase [ubiquinone] iron-sulfur subunit, mitochondrial OS=Schizosaccharomyces pombe (strain 972 / ATCC 24843) GN=sdh2 PE=3 SV=3	763	2	C	143.627	122.318	161.834
sp|O36025|MPD2_SCHPO	mpd2	GYF domain-containing protein mpd2 OS=Schizosaccharomyces pombe (strain 972 / ATCC 24843) GN=mpd2 PE=1 SV=1	6	8	C	454.018	386.656	534.866
sp|O94265|THI21_SCHPO	SPBP8B7.17c	Putative hydroxymethylpyrimidine/phosphomethylpyrimidine kinase 1 OS=Schizosaccharomyces pombe (strain 972 / ATCC 24843) GN=SPBP8B7.17c PE=3 SV=1	929	3	C	187.342	159.42	190.002
sp|Q10251|IF2P_SCHPO	SPAC56F8.03	Eukaryotic translation initiation factor 5B OS=Schizosaccharomyces pombe (strain 972 / ATCC 24843) GN=SPAC56F8.03 PE=1 SV=1	376	16	C	1627.05	1383.54	1625.4
sp|O74452|SCW1_SCHPO	scw1	Cell wall integrity protein scw1 OS=Schizosaccharomyces pombe (strain 972 / ATCC 24843) GN=scw1 PE=1 SV=1	160	6	C	318.279	270.334	351.802
sp|O60162|YG23_SCHPO	SPBC19F5.03	Uncharacterized protein C19F5.03 OS=Schizosaccharomyces pombe (strain 972 / ATCC 24843) GN=SPBC19F5.03 PE=1 SV=1	1154	6	C	319.725	271.299	304.499
sp|O94560|YGD1_SCHPO	SPBC1773.01	Uncharacterized WD repeat-containing protein C1773.01 OS=Schizosaccharomyces pombe (strain 972 / ATCC 24843) GN=SPBC1773.01 PE=3 SV=1	731	2	C	178.863	151.764	169.792
sp|O13633|YNF5_SCHPO	pi041	Uncharacterized J domain-containing protein C17A3.05c OS=Schizosaccharomyces pombe (strain 972 / ATCC 24843) GN=pi041 PE=1 SV=1	1376	2	C	288.897	245.092	246.463
sp|O14313|PMP20_SCHPO	pmp20	Putative peroxiredoxin pmp20 OS=Schizosaccharomyces pombe (strain 972 / ATCC 24843) GN=pmp20 PE=2 SV=2	1193	2	C	159.808	135.495	306.645
sp|Q9HGN7|SEC63_SCHPO	sec63	Translocation protein sec63 OS=Schizosaccharomyces pombe (strain 972 / ATCC 24843) GN=sec63 PE=1 SV=1	1237	3	C	174.94	148.177	264.455
sp|Q9P6N8|RRP3_SCHPO	rrp3	ATP-dependent rRNA helicase rrp3 OS=Schizosaccharomyces pombe (strain 972 / ATCC 24843) GN=rrp3 PE=3 SV=1	848	3	C	227.026	191.849	248.646
sp|Q09781|RS3A1_SCHPO	rps101	40S ribosomal protein S1-A OS=Schizosaccharomyces pombe (strain 972 / ATCC 24843) GN=rps101 PE=3 SV=2	453	18	C	3895.23	3290.75	2606.99
sp|P41878|RPN11_SCHPO	rpn11	26S proteasome regulatory subunit rpn11 OS=Schizosaccharomyces pombe (strain 972 / ATCC 24843) GN=rpn11 PE=1 SV=2	571	6	C	246.318	208.062	376.217
sp|Q9URV8|YBL3_SCHPO	SPBC106.03	UPF0744 protein C106.03 OS=Schizosaccharomyces pombe (strain 972 / ATCC 24843) GN=SPBC106.03 PE=1 SV=1	1115	5	C	464.903	392.635	439.218
sp|O94396|PUS1_SCHPO	pus1	tRNA pseudouridine synthase 1 OS=Schizosaccharomyces pombe (strain 972 / ATCC 24843) GN=pus1 PE=1 SV=1	458	5	C	217.105	183.295	185.345
sp|Q9HDZ2|CWH43_SCHPO	cwh43	Protein cwh43 OS=Schizosaccharomyces pombe (strain 972 / ATCC 24843) GN=cwh43 PE=2 SV=2	1457	2	C	67.0645	56.586	80.3193
sp|Q10193|SRP1_SCHPO	srp1	Pre-mRNA-splicing factor srp1 OS=Schizosaccharomyces pombe (strain 972 / ATCC 24843) GN=srp1 PE=1 SV=3	615	4	C	405.429	341.797	280.044
sp|O14179|SDO1_SCHPO	sdo1	Ribosome maturation protein sdo1 OS=Schizosaccharomyces pombe (strain 972 / ATCC 24843) GN=sdo1 PE=3 SV=1	1473	2	C	195.903	165.067	197.346
sp|O94641|HS104_SCHPO	hsp104	Heat shock protein 104 OS=Schizosaccharomyces pombe (strain 972 / ATCC 24843) GN=hsp104 PE=3 SV=1	89	28	C	2044.88	1720.58	1967.75
sp|O74892|RS2_SCHPO	rps2	40S ribosomal protein S2 OS=Schizosaccharomyces pombe (strain 972 / ATCC 24843) GN=rps2 PE=1 SV=1	221	22	C	3405.02	2864.49	2107.65
sp|O43060|EIF3F_SCHPO	eif3f	Eukaryotic translation initiation factor 3 subunit F OS=Schizosaccharomyces pombe (strain 972 / ATCC 24843) GN=eif3f PE=1 SV=1	431	5	C	184.579	155.272	188.971
sp|Q09892|HOG1_SCHPO	sty1	Mitogen-activated protein kinase sty1 OS=Schizosaccharomyces pombe (strain 972 / ATCC 24843) GN=sty1 PE=1 SV=1	1329	3	C	108.041	90.8286	154.737
sp|O94326|YGK8_SCHPO	SPBC725.08	Zinc finger protein C725.08 OS=Schizosaccharomyces pombe (strain 972 / ATCC 24843) GN=SPBC725.08 PE=1 SV=1	1384	3	C	176.736	148.424	197.86
sp|Q9UT24|BRR2_SCHPO	brr2	Pre-mRNA-splicing factor brr2 OS=Schizosaccharomyces pombe (strain 972 / ATCC 24843) GN=brr2 PE=1 SV=1	123	3	C	88.3222	74.1422	73.9336
sp|O36022|MNN9_SCHPO	mnn9	Mannan polymerase complex subunit mnn9 OS=Schizosaccharomyces pombe (strain 972 / ATCC 24843) GN=mnn9 PE=3 SV=1	793	4	C	134.788	112.913	179.728
sp|O60128|RS3_SCHPO	rps3	40S ribosomal protein S3 OS=Schizosaccharomyces pombe (strain 972 / ATCC 24843) GN=rps3 PE=1 SV=1	87	26	C	4094.89	3429.52	2538.49
sp|P28748|SPI1_SCHPO	spi1	GTP-binding nuclear protein spi1 OS=Schizosaccharomyces pombe (strain 972 / ATCC 24843) GN=spi1 PE=1 SV=1	1481	5	C	367.947	308.102	710.967
sp|Q10334|ALAT_SCHPO	SPBC582.08	Putative alanine aminotransferase OS=Schizosaccharomyces pombe (strain 972 / ATCC 24843) GN=SPBC582.08 PE=3 SV=1	1026	6	C	185.629	155.269	229.645
sp|O60155|PRS1_SCHPO	prs1	Putative proline--tRNA ligase C19C7.06 OS=Schizosaccharomyces pombe (strain 972 / ATCC 24843) GN=prs1 PE=3 SV=1	268	11	C	617.88	516.577	1062.6
sp|P78780|DHAS_SCHPO	SPCC1827.06c	Probable aspartate-semialdehyde dehydrogenase OS=Schizosaccharomyces pombe (strain 972 / ATCC 24843) GN=SPCC1827.06c PE=1 SV=2	628	2	C	84.8531	70.8888	171.66
sp|O94374|IMA2_SCHPO	imp1	Importin subunit alpha-2 OS=Schizosaccharomyces pombe (strain 972 / ATCC 24843) GN=imp1 PE=1 SV=1	930	8	C	322.809	269.608	360.455
sp|Q09130|IF2G_SCHPO	tif213	Eukaryotic translation initiation factor 2 subunit gamma OS=Schizosaccharomyces pombe (strain 972 / ATCC 24843) GN=tif213 PE=2 SV=1	332	12	C	1150.39	958.846	1056.67
sp|Q9P789|YN8E_SCHPO	SPBP35G2.14	Pumilio domain-containing protein P35G2.14 OS=Schizosaccharomyces pombe (strain 972 / ATCC 24843) GN=SPBP35G2.14 PE=1 SV=2	210	2	C	43.1485	35.9018	62.063
sp|P78813|YCTB_SCHPO	SPCC794.11c	ENTH domain-containing protein C794.11c OS=Schizosaccharomyces pombe (strain 972 / ATCC 24843) GN=SPCC794.11c PE=1 SV=2	798	3	C	173.231	144.078	228.455
sp|Q09852|YAEC_SCHPO	SPAC23D3.12	Putative inorganic phosphate transporter C23D3.12 OS=Schizosaccharomyces pombe (strain 972 / ATCC 24843) GN=SPAC23D3.12 PE=1 SV=1	778	3	C	222.712	184.992	234.951
sp|Q9USZ1|EFGM_SCHPO	mef1	Elongation factor G, mitochondrial OS=Schizosaccharomyces pombe (strain 972 / ATCC 24843) GN=mef1 PE=3 SV=2	996	3	C	90.006	74.7033	117.148
sp|O13793|FSF1_SCHPO	fsf1	Probable mitochondrial transport protein fsf1 OS=Schizosaccharomyces pombe (strain 972 / ATCC 24843) GN=fsf1 PE=3 SV=2	1261	2	C	38.3779	31.7686	50.8195
sp|Q9P6I7|ADE_SCHPO	aah1	Adenine deaminase OS=Schizosaccharomyces pombe (strain 972 / ATCC 24843) GN=aah1 PE=1 SV=1	927	2	C	112.988	93.2727	165.057
sp|O60171|TAF10_SCHPO	taf10	Transcription initiation factor TFIID subunit 10 OS=Schizosaccharomyces pombe (strain 972 / ATCC 24843) GN=taf10 PE=3 SV=1	1106	2	C	113.791	93.841	104.546
sp|Q10484|YDFC_SCHPO	SPAC17C9.12	Uncharacterized protein C17C9.12 OS=Schizosaccharomyces pombe (strain 972 / ATCC 24843) GN=SPAC17C9.12 PE=1 SV=2	474	5	C	472.116	389.14	701.093
sp|O94672|SC232_SCHPO	sec232	Protein transport protein sec23-2 OS=Schizosaccharomyces pombe (strain 972 / ATCC 24843) GN=sec232 PE=1 SV=1	1262	2	C	130.535	107.572	156.598
sp|O59787|SRP72_SCHPO	srp72	Signal recognition particle subunit srp72 OS=Schizosaccharomyces pombe (strain 972 / ATCC 24843) GN=srp72 PE=3 SV=1	396	8	C	620.692	510.868	658.67
sp|O13846|SCS7_SCHPO	SPAC19G12.08	Ceramide very long chain fatty acid hydroxylase-like protein C19G12.08 OS=Schizosaccharomyces pombe (strain 972 / ATCC 24843) GN=SPAC19G12.08 PE=3 SV=1	939	6	C	345.93	284.631	504.919
sp|O74733|CFT1_SCHPO	cft1	Protein cft1 OS=Schizosaccharomyces pombe (strain 972 / ATCC 24843) GN=cft1 PE=3 SV=1	1412	2	C	116.306	95.6227	111.37
sp|P20772|PUR2_SCHPO	ade1	Bifunctional purine biosynthetic protein ADE1 OS=Schizosaccharomyces pombe (strain 972 / ATCC 24843) GN=ade1 PE=3 SV=1	856	7	C	507.725	416.786	825.379
sp|O13792|SUB2_SCHPO	uap56	ATP-dependent RNA helicase uap56 OS=Schizosaccharomyces pombe (strain 972 / ATCC 24843) GN=uap56 PE=1 SV=3	718	10	C	710.711	583.356	958.518
sp|O94435|MUG35_SCHPO	mug35	Meiotically up-regulated gene 35 protein OS=Schizosaccharomyces pombe (strain 972 / ATCC 24843) GN=mug35 PE=1 SV=2	819	4	C	242.179	198.429	277.558
sp|O60160|OMH1_SCHPO	omh1	O-glycoside alpha-1,2-mannosyltransferase omh1 OS=Schizosaccharomyces pombe (strain 972 / ATCC 24843) GN=omh1 PE=3 SV=1	1454	2	C	70.6099	57.8456	72.1204
sp|Q9P7G9|KAPS_SCHPO	met14	Adenylyl-sulfate kinase OS=Schizosaccharomyces pombe (strain 972 / ATCC 24843) GN=met14 PE=3 SV=1	1358	2	C	277.312	227.051	366.945
sp|O13813|TOM22_SCHPO	tom22	Mitochondrial import receptor subunit tom22 OS=Schizosaccharomyces pombe (strain 972 / ATCC 24843) GN=tom22 PE=3 SV=1	1159	2	C	102.236	83.6057	119.582
sp|Q09757|RS9A_SCHPO	rps9a	40S ribosomal protein S9-A OS=Schizosaccharomyces pombe (strain 972 / ATCC 24843) GN=rps9a PE=1 SV=2	990	14	C	1489.03	1215.66	956.503
sp|Q09801|FIP1X_SCHPO	SPAC22G7.10	Pre-mRNA polyadenylation factor fip1 OS=Schizosaccharomyces pombe (strain 972 / ATCC 24843) GN=SPAC22G7.10 PE=3 SV=1	646	3	C	322.255	263.04	196.199
sp|Q9UUF2|SYMC_SCHPO	rar1	Probable methionine--tRNA ligase, cytoplasmic OS=Schizosaccharomyces pombe (strain 972 / ATCC 24843) GN=rar1 PE=3 SV=1	357	16	C	1513.26	1235.02	1462.68
sp|O94305|MGLL_SCHPO	SPCC5E4.05c	Putative monoglyceride lipase OS=Schizosaccharomyces pombe (strain 972 / ATCC 24843) GN=SPCC5E4.05c PE=1 SV=1	403	7	C	649.361	529.587	562.824
sp|P0C016|RS27A_SCHPO	ubi3	Ubiquitin-40S ribosomal protein S27a OS=Schizosaccharomyces pombe (strain 972 / ATCC 24843) GN=ubi3 PE=1 SV=2	949	10	C	1514.87	1235.17	1368.62
sp|O42926|VP13B_SCHPO	vps13b	Vacuolar protein sorting-associated protein 13b OS=Schizosaccharomyces pombe (strain 972 / ATCC 24843) GN=vps13b PE=2 SV=1	164	4	C	282.769	230.556	277.776
sp|O94615|PPR8_SCHPO	ppr8	Pentatricopeptide repeat-containing protein 8, mitochondrial OS=Schizosaccharomyces pombe (strain 972 / ATCC 24843) GN=ppr8 PE=4 SV=1	537	3	C	144.104	117.295	122.997
sp|P41003|SMC2_SCHPO	cut14	Structural maintenance of chromosomes protein 2 OS=Schizosaccharomyces pombe (strain 972 / ATCC 24843) GN=cut14 PE=1 SV=2	491	4	C	310.181	252.369	248.084
sp|O74718|ERF3_SCHPO	sup35	Eukaryotic peptide chain release factor GTP-binding subunit OS=Schizosaccharomyces pombe (strain 972 / ATCC 24843) GN=sup35 PE=1 SV=2	12	22	C	1460.18	1187	1730.36
sp|Q10318|ILV3_SCHPO	SPAC17G8.06c	Putative dihydroxy-acid dehydratase, mitochondrial OS=Schizosaccharomyces pombe (strain 972 / ATCC 24843) GN=SPAC17G8.06c PE=2 SV=1	952	4	C	176.764	143.319	286.735
sp|Q10147|TCPB_SCHPO	cct2	Probable T-complex protein 1 subunit beta OS=Schizosaccharomyces pombe (strain 972 / ATCC 24843) GN=cct2 PE=3 SV=1	524	15	C	1233.97	1000.37	1979.2
sp|P56289|IF5A1_SCHPO	tif51a	Eukaryotic translation initiation factor 5A-1 OS=Schizosaccharomyces pombe (strain 972 / ATCC 24843) GN=tif51a PE=1 SV=1	655	13	C	934.04	756.846	838.495
sp|Q9UST4|IF5A2_SCHPO	tif51b	Eukaryotic translation initiation factor 5A-2 OS=Schizosaccharomyces pombe (strain 972 / ATCC 24843) GN=tif51b PE=3 SV=2	655	2	C	89.7614	72.6924	86.3782
sp|O42870|SYFA_SCHPO	frs2	Phenylalanine--tRNA ligase alpha subunit OS=Schizosaccharomyces pombe (strain 972 / ATCC 24843) GN=frs2 PE=3 SV=3	629	3	C	104.626	84.6476	207.77
sp|O74988|COX5_SCHPO	cox5	Cytochrome c oxidase polypeptide 5, mitochondrial OS=Schizosaccharomyces pombe (strain 972 / ATCC 24843) GN=cox5 PE=3 SV=2	1219	2	C	73.3775	59.2941	113.511
sp|O75001|MCM7_SCHPO	mcm7	DNA replication licensing factor mcm7 OS=Schizosaccharomyces pombe (strain 972 / ATCC 24843) GN=mcm7 PE=1 SV=1	1344	2	C	108.846	87.8729	143.361
sp|P50522|EF1A1_SCHPO	tef1a	Elongation factor 1-alpha-A OS=Schizosaccharomyces pombe (strain 972 / ATCC 24843) GN=tef1a PE=1 SV=2	957	57	C	4667.64	3766.91	5955.97
sp|O94675|MAM33_SCHPO	SPBC776.07	Mitochondrial acidic protein mam33 OS=Schizosaccharomyces pombe (strain 972 / ATCC 24843) GN=SPBC776.07 PE=3 SV=1	980	3	C	214.861	173.351	248.842
sp|O14096|TGTL_SCHPO	SPAC2F3.13c	Queuine tRNA-ribosyltransferase-like protein OS=Schizosaccharomyces pombe (strain 972 / ATCC 24843) GN=SPAC2F3.13c PE=3 SV=4	512	2	C	92.6952	74.7637	104.82
sp|Q10659|SPO14_SCHPO	spo14	Membrane glycoprotein spo14 OS=Schizosaccharomyces pombe (strain 972 / ATCC 24843) GN=spo14 PE=2 SV=1	1245	3	C	101.435	81.7524	99.3876
sp|Q9P6R2|YOH8_SCHPO	SPBC13E7.08c	Uncharacterized protein C13E7.08c OS=Schizosaccharomyces pombe (strain 972 / ATCC 24843) GN=SPBC13E7.08c PE=3 SV=1	1293	4	C	207.602	167.272	273.013
sp|Q10104|GLYM_SCHPO	shm2	Serine hydroxymethyltransferase, mitochondrial OS=Schizosaccharomyces pombe (strain 972 / ATCC 24843) GN=shm2 PE=3 SV=2	330	4	C	473.715	381.324	286.684
sp|Q10176|OST1_SCHPO	ost1	Dolichyl-diphosphooligosaccharide--protein glycosyltransferase subunit 1 OS=Schizosaccharomyces pombe (strain 972 / ATCC 24843) GN=ost1 PE=3 SV=1	1047	7	C	555.142	446.731	490.983
sp|Q9UUB4|PUR7_SCHPO	ade7	Phosphoribosylaminoimidazole-succinocarboxamide synthase OS=Schizosaccharomyces pombe (strain 972 / ATCC 24843) GN=ade7 PE=3 SV=1	1314	2	C	50.6328	40.7332	102.692
sp|O14049|RS8A_SCHPO	rps8a	40S ribosomal protein S8-A OS=Schizosaccharomyces pombe (strain 972 / ATCC 24843) GN=rps8a PE=3 SV=1	566	12	C	1001.16	805.383	544.664
sp|Q9P3A7|CDC48_SCHPO	cdc48	Cell division cycle protein 48 OS=Schizosaccharomyces pombe (strain 972 / ATCC 24843) GN=cdc48 PE=1 SV=2	181	23	C	1729.65	1391.1	2996.25
sp|Q9P4W9|RS4C_SCHPO	rps4c	40S ribosomal protein S4-C OS=Schizosaccharomyces pombe (strain 972 / ATCC 24843) GN=rps4c PE=1 SV=1	1085	4	C	302.83	243.458	193.496
sp|O94335|STT3_SCHPO	stt3	Dolichyl-diphosphooligosaccharide--protein glycosyltransferase subunit stt3 OS=Schizosaccharomyces pombe (strain 972 / ATCC 24843) GN=stt3 PE=3 SV=1	426	5	C	445.402	358.007	355.964
sp|O14217|TOM70_SCHPO	tom70	Probable mitochondrial import receptor subunit tom70 OS=Schizosaccharomyces pombe (strain 972 / ATCC 24843) GN=tom70 PE=1 SV=1	339	19	C	1488.23	1195.12	1400.2
sp|O74548|ARGD_SCHPO	arg1	Probable acetylornithine aminotransferase, mitochondrial OS=Schizosaccharomyces pombe (strain 972 / ATCC 24843) GN=arg1 PE=2 SV=1	1171	5	C	260.499	209.177	253.916
sp|Q9P7C0|YKU5_SCHPO	SPAC2E1P5.05	Uncharacterized WD repeat-containing protein C2E1P5.05 OS=Schizosaccharomyces pombe (strain 972 / ATCC 24843) GN=SPAC2E1P5.05 PE=3 SV=1	1002	4	C	937.515	752.458	390.001
sp|O94363|RHB1_SCHPO	rhb1	GTP-binding protein rhb1 OS=Schizosaccharomyces pombe (strain 972 / ATCC 24843) GN=rhb1 PE=3 SV=1	1218	2	C	61.9236	49.6877	92.7641
sp|O74781|SYRC_SCHPO	mrs1	Probable arginine--tRNA ligase, cytoplasmic OS=Schizosaccharomyces pombe (strain 972 / ATCC 24843) GN=mrs1 PE=2 SV=1	581	18	C	484.381	388.623	1005.98
sp|Q09843|RFC2_SCHPO	rfc2	Replication factor C subunit 2 OS=Schizosaccharomyces pombe (strain 972 / ATCC 24843) GN=rfc2 PE=1 SV=1	1301	4	C	206.914	165.989	232.408
sp|O94536|UCP12_SCHPO	ucp12	Putative ATP-dependent RNA helicase ucp12 OS=Schizosaccharomyces pombe (strain 972 / ATCC 24843) GN=ucp12 PE=3 SV=1	874	4	C	315.629	253.139	268.91
sp|P32390|ARP3_SCHPO	act2	Actin-related protein 3 OS=Schizosaccharomyces pombe (strain 972 / ATCC 24843) GN=act2 PE=1 SV=1	121	6	C	258.657	207.326	322.009
sp|O13735|FAT1_SCHPO	fat1	Actin-interacting protein 3 homolog OS=Schizosaccharomyces pombe (strain 972 / ATCC 24843) GN=fat1 PE=1 SV=2	1290	2	C	61.6423	49.4059	96.4285
sp|Q09769|LONM_SCHPO	pim1	Lon protease homolog, mitochondrial OS=Schizosaccharomyces pombe (strain 972 / ATCC 24843) GN=pim1 PE=3 SV=1	599	12	C	840.544	673.277	902.359
sp|Q9UU83|PAL1_SCHPO	pal1	Protein pal1 OS=Schizosaccharomyces pombe (strain 972 / ATCC 24843) GN=pal1 PE=1 SV=1	1012	6	C	499.807	399.996	433.889
sp|O74830|YC12_SCHPO	SPCC1183.02	Putative glutathione S-transferase C1183.02 OS=Schizosaccharomyces pombe (strain 972 / ATCC 24843) GN=SPCC1183.02 PE=3 SV=1	1132	5	C	100.262	80.222	213.249
sp|P05752|RS6A_SCHPO	rps6a	40S ribosomal protein S6-A OS=Schizosaccharomyces pombe (strain 972 / ATCC 24843) GN=rps6a PE=1 SV=2	1426	13	C	2283.03	1826.63	1405.93
sp|P36586|YPT5_SCHPO	ypt5	GTP-binding protein ypt5 OS=Schizosaccharomyces pombe (strain 972 / ATCC 24843) GN=ypt5 PE=1 SV=1	1243	3	C	127.701	102.111	180.462
sp|Q9UUE1|PYC_SCHPO	pyr1	Pyruvate carboxylase OS=Schizosaccharomyces pombe (strain 972 / ATCC 24843) GN=pyr1 PE=3 SV=1	33	9	C	516.324	412.622	632.156
sp|Q9UTS6|DYLT_SCHPO	dlc1	Dynein light chain Tctex-type OS=Schizosaccharomyces pombe (strain 972 / ATCC 24843) GN=dlc1 PE=1 SV=1	688	5	C	211.211	168.713	247.982
sp|O74402|HSP78_SCHPO	hsp78	Heat shock protein 78, mitochondrial OS=Schizosaccharomyces pombe (strain 972 / ATCC 24843) GN=hsp78 PE=3 SV=1	248	17	C	821.99	656.28	1020
sp|O13801|YE04_SCHPO	SPAC17H9.04c	Uncharacterized RNA-binding protein C17H9.04c OS=Schizosaccharomyces pombe (strain 972 / ATCC 24843) GN=SPAC17H9.04c PE=1 SV=1	300	4	C	357.529	285.45	363.287
sp|Q9P380|PTR2_SCHPO	ptr2	Probable peptide transporter ptr2 OS=Schizosaccharomyces pombe (strain 972 / ATCC 24843) GN=ptr2 PE=1 SV=1	97	9	C	477.884	381.095	457.661
sp|Q10190|LSG1_SCHPO	lsg1	Large subunit GTPase 1 OS=Schizosaccharomyces pombe (strain 972 / ATCC 24843) GN=lsg1 PE=3 SV=1	1306	6	C	277.571	221.337	303.501
sp|Q92371|NACB_SCHPO	btf3	Nascent polypeptide-associated complex subunit beta OS=Schizosaccharomyces pombe (strain 972 / ATCC 24843) GN=btf3 PE=2 SV=2	1153	3	C	652.739	520.241	506.13
sp|Q9P7T8|YIW2_SCHPO	SPAC694.02	Uncharacterized helicase C694.02 OS=Schizosaccharomyces pombe (strain 972 / ATCC 24843) GN=SPAC694.02 PE=3 SV=1	39	14	C	935.258	744.564	793.416
sp|O74976|FAT2_SCHPO	SPCC1827.03c	Putative peroxisomal-coenzyme A synthetase OS=Schizosaccharomyces pombe (strain 972 / ATCC 24843) GN=SPCC1827.03c PE=1 SV=1	409	15	C	2774.9	2207.38	1862.46
sp|Q9USH9|YJQ1_SCHPO	SPCC825.01	Uncharacterized ABC transporter ATP-binding protein C825.01 OS=Schizosaccharomyces pombe (strain 972 / ATCC 24843) GN=SPCC825.01 PE=1 SV=1	614	12	C	978.81	778.389	829.65
sp|P04688|TBA1_SCHPO	nda2	Tubulin alpha-1 chain OS=Schizosaccharomyces pombe (strain 972 / ATCC 24843) GN=nda2 PE=3 SV=2	218	10	C	612.248	485.879	559.327
sp|Q9P7W3|ACL1_SCHPO	SPBC1703.07	Probable ATP-citrate synthase subunit 1 OS=Schizosaccharomyces pombe (strain 972 / ATCC 24843) GN=SPBC1703.07 PE=1 SV=1	222	16	C	448.596	355.949	610.551
sp|O14164|EIF3C_SCHPO	nip1	Eukaryotic translation initiation factor 3 subunit C OS=Schizosaccharomyces pombe (strain 972 / ATCC 24843) GN=nip1 PE=1 SV=2	259	25	C	1791.95	1421.13	1596.92
sp|O94504|TRX2_SCHPO	trx2	Thioredoxin-2, mitochondrial OS=Schizosaccharomyces pombe (strain 972 / ATCC 24843) GN=trx2 PE=1 SV=2	502	2	C	88.2859	70.0142	121.184
sp|Q9P7S3|SSR3_SCHPO	ssr3	SWI/SNF and RSC complexes subunit ssr3 OS=Schizosaccharomyces pombe (strain 972 / ATCC 24843) GN=ssr3 PE=1 SV=1	176	3	C	193.798	153.541	193.329
sp|O60105|PUR8_SCHPO	ade8	Adenylosuccinate lyase OS=Schizosaccharomyces pombe (strain 972 / ATCC 24843) GN=ade8 PE=3 SV=1	460	3	C	311.945	247.017	515.812
sp|Q9P6N4|PEP5_SCHPO	vps11	E3 ubiquitin-protein ligase pep5 OS=Schizosaccharomyces pombe (strain 972 / ATCC 24843) GN=vps11 PE=3 SV=1	1024	2	C	126.266	99.7748	125.793
sp|Q03392|PCNA_SCHPO	pcn1	Proliferating cell nuclear antigen OS=Schizosaccharomyces pombe (strain 972 / ATCC 24843) GN=pcn1 PE=1 SV=1	133	2	C	167.77	132.386	392.458
sp|P24487|ATPA_SCHPO	atp1	ATP synthase subunit alpha, mitochondrial OS=Schizosaccharomyces pombe (strain 972 / ATCC 24843) GN=atp1 PE=3 SV=1	61	7	C	335.832	264.912	697.479
sp|P87142|YDMC_SCHPO	SPAC57A7.12	Heat shock protein 70 homolog C57A7.12 OS=Schizosaccharomyces pombe (strain 972 / ATCC 24843) GN=SPAC57A7.12 PE=1 SV=3	443	18	C	1931.87	1523.78	1664.6
sp|Q9P6R9|CWC22_SCHPO	cwf22	Pre-mRNA-splicing factor cwf22 OS=Schizosaccharomyces pombe (strain 972 / ATCC 24843) GN=cwf22 PE=1 SV=3	710	2	C	234.575	185.009	246.13
sp|Q9USR3|STT4_SCHPO	stt4	Phosphatidylinositol 4-kinase stt4 OS=Schizosaccharomyces pombe (strain 972 / ATCC 24843) GN=stt4 PE=3 SV=1	899	2	C	89.5995	70.6167	78.4651
sp|Q9US06|PAF1_SCHPO	SPAC664.03	RNA polymerase II-associated protein 1 homolog OS=Schizosaccharomyces pombe (strain 972 / ATCC 24843) GN=SPAC664.03 PE=1 SV=2	737	2	C	175.038	137.952	174.145
sp|Q09191|RPAB1_SCHPO	rpb5	DNA-directed RNA polymerases I, II, and III subunit RPABC1 OS=Schizosaccharomyces pombe (strain 972 / ATCC 24843) GN=rpb5 PE=1 SV=1	1232	4	C	318.365	250.901	333.41
sp|P78773|ACSA_SCHPO	SPCC191.02c	Probable acetyl-coenzyme A synthetase OS=Schizosaccharomyces pombe (strain 972 / ATCC 24843) GN=SPCC191.02c PE=1 SV=2	255	12	C	521.551	410.769	674.727
sp|P78958|G3P1_SCHPO	tdh1	Glyceraldehyde-3-phosphate dehydrogenase 1 OS=Schizosaccharomyces pombe (strain 972 / ATCC 24843) GN=tdh1 PE=1 SV=1	67	22	C	1940.8	1527.94	4040.65
sp|O14369|SCE3_SCHPO	sce3	Probable RNA-binding protein sce3 OS=Schizosaccharomyces pombe (strain 972 / ATCC 24843) GN=sce3 PE=1 SV=1	558	6	C	364.753	287.084	327.446
sp|O36027|WSP1_SCHPO	wsp1	Wiskott-Aldrich syndrome protein homolog 1 OS=Schizosaccharomyces pombe (strain 972 / ATCC 24843) GN=wsp1 PE=1 SV=3	506	8	C	697.301	548.566	336.758
sp|O94438|RS3A2_SCHPO	rps102	40S ribosomal protein S1-B OS=Schizosaccharomyces pombe (strain 972 / ATCC 24843) GN=rps102 PE=1 SV=3	453	9	C	1341.24	1053.82	793.18
sp|O60135|LCF1_SCHPO	lcf1	Long-chain-fatty-acid--CoA ligase 1 OS=Schizosaccharomyces pombe (strain 972 / ATCC 24843) GN=lcf1 PE=3 SV=1	961	5	C	203.644	159.905	241.968
sp|O14230|FPPS_SCHPO	fps1	Farnesyl pyrophosphate synthase OS=Schizosaccharomyces pombe (strain 972 / ATCC 24843) GN=fps1 PE=1 SV=1	579	2	C	59.236	46.5105	115.462
sp|Q09895|YAI8_SCHPO	SPAC24B11.08c	Uncharacterized protein C24B11.08c OS=Schizosaccharomyces pombe (strain 972 / ATCC 24843) GN=SPAC24B11.08c PE=3 SV=1	1286	2	C	88.3193	69.3334	100.733
sp|O74970|PRP39_SCHPO	prp39	Pre-mRNA-processing factor 39 OS=Schizosaccharomyces pombe (strain 972 / ATCC 24843) GN=prp39 PE=3 SV=1	979	9	C	357.586	280.601	326.448
sp|O42943|YBP8_SCHPO	SPBC16H5.08c	Uncharacterized ABC transporter ATP-binding protein C16H5.08c OS=Schizosaccharomyces pombe (strain 972 / ATCC 24843) GN=SPBC16H5.08c PE=1 SV=1	326	22	C	1014.95	795.495	1292.72
sp|Q9US05|BFR2_SCHPO	bfr2	Protein bfr2 OS=Schizosaccharomyces pombe (strain 972 / ATCC 24843) GN=bfr2 PE=1 SV=1	379	8	C	1044.09	818.249	880.209
sp|O43075|YGWC_SCHPO	pi053	Probable transcriptional regulatory protein C8D2.12c OS=Schizosaccharomyces pombe (strain 972 / ATCC 24843) GN=pi053 PE=3 SV=2	1380	2	C	76.5567	59.9874	92.5775
sp|Q09826|SDS23_SCHPO	sds23	Protein sds23/moc1 OS=Schizosaccharomyces pombe (strain 972 / ATCC 24843) GN=sds23 PE=1 SV=1	203	3	C	144.959	113.5	157.69
sp|P17476|RLA1_SCHPO	rpa1	60S acidic ribosomal protein P1-alpha 1 OS=Schizosaccharomyces pombe (strain 972 / ATCC 24843) GN=rpa1 PE=3 SV=1	54	9	C	1970.05	1539.73	1052.22
sp|Q09736|CP51_SCHPO	erg11	Lanosterol 14-alpha demethylase erg11 OS=Schizosaccharomyces pombe (strain 972 / ATCC 24843) GN=erg11 PE=1 SV=1	753	9	C	327.618	256.038	389.433
sp|O94319|SEC13_SCHPO	sec13	Protein transport protein sec13 OS=Schizosaccharomyces pombe (strain 972 / ATCC 24843) GN=sec13 PE=1 SV=1	1531	5	C	302.373	236.071	346.231
sp|Q10202|DBP3_SCHPO	dbp3	ATP-dependent RNA helicase dbp3 OS=Schizosaccharomyces pombe (strain 972 / ATCC 24843) GN=dbp3 PE=3 SV=1	348	14	C	1058.08	825.17	930.01
sp|P41887|HSP90_SCHPO	swo1	Heat shock protein 90 homolog OS=Schizosaccharomyces pombe (strain 972 / ATCC 24843) GN=swo1 PE=1 SV=2	315	47	C	1915.82	1492.72	3304.59
sp|O13880|VHT1_SCHPO	vht1	Vitamin H transporter 1 OS=Schizosaccharomyces pombe (strain 972 / ATCC 24843) GN=vht1 PE=2 SV=1	1017	2	C	68.267	53.1151	47.1908
sp|O42700|TAL1_SCHPO	tal1	Transaldolase OS=Schizosaccharomyces pombe (strain 972 / ATCC 24843) GN=tal1 PE=1 SV=2	526	10	C	845.341	657.542	2022.19
sp|O94515|TCPZ_SCHPO	cct6	T-complex protein 1 subunit zeta OS=Schizosaccharomyces pombe (strain 972 / ATCC 24843) GN=cct6 PE=3 SV=1	794	15	C	989.784	769.325	1273.23
sp|O94246|GSH0_SCHPO	SPCC737.06c	Putative glutamate--cysteine ligase regulatory subunit OS=Schizosaccharomyces pombe (strain 972 / ATCC 24843) GN=SPCC737.06c PE=3 SV=1	1295	2	C	139.67	108.438	178.279
sp|Q10099|SEH1_SCHPO	seh1	Nucleoporin seh1 OS=Schizosaccharomyces pombe (strain 972 / ATCC 24843) GN=seh1 PE=1 SV=1	530	2	C	373.582	290.001	329.05
sp|P30821|P25_SCHPO	obr1	P25 protein OS=Schizosaccharomyces pombe (strain 972 / ATCC 24843) GN=obr1 PE=1 SV=1	588	3	C	186.771	144.921	724.863
sp|O94313|CARB_SCHPO	arg4	Carbamoyl-phosphate synthase arginine-specific large chain OS=Schizosaccharomyces pombe (strain 972 / ATCC 24843) GN=arg4 PE=3 SV=1	155	7	C	434.123	336.72	618.327
sp|Q9HGM5|DBP8_SCHPO	dbp8	ATP-dependent RNA helicase dbp8 OS=Schizosaccharomyces pombe (strain 972 / ATCC 24843) GN=dbp8 PE=3 SV=1	785	3	C	270.526	209.789	272.229
sp|Q9P3W6|YLI2_SCHPO	SPAC458.02c	Uncharacterized protein C458.02c OS=Schizosaccharomyces pombe (strain 972 / ATCC 24843) GN=SPAC458.02c PE=1 SV=1	152	18	C	3674.64	2848.37	2117.76
sp|O74853|FAP1H_SCHPO	fap1	FKBP12-associated protein 1 homolog OS=Schizosaccharomyces pombe (strain 972 / ATCC 24843) GN=fap1 PE=1 SV=1	196	2	C	132.61	102.69	125.496
sp|P78827|ILV5_SCHPO	ilv5	Probable ketol-acid reductoisomerase, mitochondrial OS=Schizosaccharomyces pombe (strain 972 / ATCC 24843) GN=ilv5 PE=1 SV=2	308	19	C	581.29	449.982	847.429
sp|O94582|TRPE_SCHPO	trp3	Probable anthranilate synthase component 1 OS=Schizosaccharomyces pombe (strain 972 / ATCC 24843) GN=trp3 PE=1 SV=1	219	9	C	491.702	380.577	877.584
sp|Q9HDW6|VATC_SCHPO	vma5	V-type proton ATPase subunit C OS=Schizosaccharomyces pombe (strain 972 / ATCC 24843) GN=vma5 PE=1 SV=1	1350	4	C	80.3895	62.2051	119.788
sp|O74395|STR1_SCHPO	str1	Siderophore iron transporter 1 OS=Schizosaccharomyces pombe (strain 972 / ATCC 24843) GN=str1 PE=1 SV=1	1059	5	C	293.578	226.943	692.235
sp|Q10329|PSA4_SCHPO	pre6	Probable proteasome subunit alpha type-4 OS=Schizosaccharomyces pombe (strain 972 / ATCC 24843) GN=pre6 PE=3 SV=1	399	3	C	170.435	131.721	343.645
sp|O13775|SYEC_SCHPO	gus1	Probable glutamate--tRNA ligase, cytoplasmic OS=Schizosaccharomyces pombe (strain 972 / ATCC 24843) GN=gus1 PE=1 SV=1	47	20	C	1568.63	1212.15	1681.78
sp|O74519|YCPD_SCHPO	SPCC663.13c	Uncharacterized N-acetyltransferase C663.13c OS=Schizosaccharomyces pombe (strain 972 / ATCC 24843) GN=SPCC663.13c PE=3 SV=1	1309	2	C	54.9953	42.4927	83.5946
sp|O74907|BCP1_SCHPO	bcp1	Protein bcp1 OS=Schizosaccharomyces pombe (strain 972 / ATCC 24843) GN=bcp1 PE=3 SV=2	1054	2	C	52.1641	40.1861	69.6587
sp|O74879|NOL10_SCHPO	enp2	Ribosome biogenesis protein enp2 homolog OS=Schizosaccharomyces pombe (strain 972 / ATCC 24843) GN=enp2 PE=1 SV=1	609	12	C	1449.3	1116.21	1154.77
sp|Q9USM7|TIM23_SCHPO	tim23	Mitochondrial import inner membrane translocase subunit tim23 OS=Schizosaccharomyces pombe (strain 972 / ATCC 24843) GN=tim23 PE=3 SV=1	1273	2	C	326.159	251.024	280.305
sp|P36621|CAP_SCHPO	cap1	Adenylyl cyclase-associated protein OS=Schizosaccharomyces pombe (strain 972 / ATCC 24843) GN=cap1 PE=1 SV=1	650	14	C	1373.86	1057.17	1007.47
sp|Q9UT48|EIF3H_SCHPO	eif3h	Eukaryotic translation initiation factor 3 subunit H OS=Schizosaccharomyces pombe (strain 972 / ATCC 24843) GN=eif3h PE=1 SV=1	19	13	C	1280.55	985.106	1118.46
sp|P13681|PP11_SCHPO	dis2	Serine/threonine-protein phosphatase PP1-1 OS=Schizosaccharomyces pombe (strain 972 / ATCC 24843) GN=dis2 PE=1 SV=1	762	2	C	66.4226	51.0566	73.3929
sp|O13784|RS24A_SCHPO	rps24a	40S ribosomal protein S24-A OS=Schizosaccharomyces pombe (strain 972 / ATCC 24843) GN=rps24a PE=3 SV=3	1548	9	C	1380.85	1060.75	697.8
sp|P78789|YC63_SCHPO	SPCC1919.03c	Uncharacterized protein C1919.03c OS=Schizosaccharomyces pombe (strain 972 / ATCC 24843) GN=SPCC1919.03c PE=1 SV=2	1572	2	C	89.8388	69.0127	126.089
sp|O59727|YHX7_SCHPO	SPBC3E7.07c	Protein PBDC1 homolog OS=Schizosaccharomyces pombe (strain 972 / ATCC 24843) GN=SPBC3E7.07c PE=3 SV=1	576	6	C	339.092	260.34	432.671
sp|O59810|VGL1_SCHPO	vgl1	Vigilin 1 OS=Schizosaccharomyces pombe (strain 972 / ATCC 24843) GN=vgl1 PE=1 SV=2	114	44	C	4540.33	3484.22	2315.9
sp|O59739|BAG1B_SCHPO	bag102	BAG family molecular chaperone regulator 1B OS=Schizosaccharomyces pombe (strain 972 / ATCC 24843) GN=bag102 PE=1 SV=1	543	3	C	108.916	83.5169	73.159
sp|P36595|RPAB2_SCHPO	rpb6	DNA-directed RNA polymerases I, II, and III subunit RPABC2 OS=Schizosaccharomyces pombe (strain 972 / ATCC 24843) GN=rpb6 PE=1 SV=1	1368	2	C	119.582	91.6584	104.764
sp|O94559|YF65_SCHPO	SPAC23C4.05c	Uncharacterized protein C23C4.05c OS=Schizosaccharomyces pombe (strain 972 / ATCC 24843) GN=SPAC23C4.05c PE=3 SV=1	1291	2	C	49.3175	37.7332	70.6629
sp|Q9P7C1|YKU3_SCHPO	SPAC2E1P5.03	Uncharacterized J domain-containing protein C2E1P5.03 OS=Schizosaccharomyces pombe (strain 972 / ATCC 24843) GN=SPAC2E1P5.03 PE=3 SV=1	454	4	C	318.367	243.432	270.25
sp|Q9P7U2|YI7E_SCHPO	SPAC977.14c	Putative aryl-alcohol dehydrogenase C977.14c OS=Schizosaccharomyces pombe (strain 972 / ATCC 24843) GN=SPAC977.14c PE=1 SV=1	359	8	C	401.317	306.646	1202.5
sp|O74407|SYDC_SCHPO	dps1	Aspartate--tRNA ligase, cytoplasmic OS=Schizosaccharomyces pombe (strain 972 / ATCC 24843) GN=dps1 PE=1 SV=1	368	15	C	780.53	596.383	868.296
sp|O13783|BRO1_SCHPO	bro1	Vacuolar protein-sorting protein bro1 OS=Schizosaccharomyces pombe (strain 972 / ATCC 24843) GN=bro1 PE=3 SV=1	331	3	C	283.079	216.198	276.809
sp|O94567|SYNC_SCHPO	nrs1	Probable asparagine--tRNA ligase, cytoplasmic OS=Schizosaccharomyces pombe (strain 972 / ATCC 24843) GN=nrs1 PE=3 SV=1	13	9	C	528.911	403.837	626.982
sp|Q9UTM4|TCPE_SCHPO	cct5	T-complex protein 1 subunit epsilon OS=Schizosaccharomyces pombe (strain 972 / ATCC 24843) GN=cct5 PE=3 SV=1	601	14	C	1197.75	913.826	1427.34
sp|O94501|TCPA_SCHPO	cct1	T-complex protein 1 subunit alpha OS=Schizosaccharomyces pombe (strain 972 / ATCC 24843) GN=cct1 PE=3 SV=1	270	18	C	1366.17	1042.05	1710.56
sp|O14205|VPS74_SCHPO	vps74	Vacuolar protein sorting-associated protein 74 OS=Schizosaccharomyces pombe (strain 972 / ATCC 24843) GN=vps74 PE=1 SV=2	739	3	C	88.9528	67.8319	84.8257
sp|O94321|MPR1_SCHPO	mpr1	Multistep phosphorelay regulator 1 OS=Schizosaccharomyces pombe (strain 972 / ATCC 24843) GN=mpr1 PE=1 SV=1	1331	2	C	53.352	40.6625	76.9879
sp|Q09718|AP2M_SCHPO	apm4	AP-2 complex subunit mu OS=Schizosaccharomyces pombe (strain 972 / ATCC 24843) GN=apm4 PE=1 SV=1	271	6	C	398.737	303.694	247.913
sp|Q09756|HXK1_SCHPO	hxk1	Hexokinase-1 OS=Schizosaccharomyces pombe (strain 972 / ATCC 24843) GN=hxk1 PE=2 SV=1	714	12	C	514.743	391.448	713.402
sp|O42849|SYFB_SCHPO	frs1	Phenylalanine--tRNA ligase beta subunit OS=Schizosaccharomyces pombe (strain 972 / ATCC 24843) GN=frs1 PE=3 SV=1	807	8	C	394.661	300.027	606.687
sp|O60060|CARA_SCHPO	arg5	Carbamoyl-phosphate synthase arginine-specific small chain OS=Schizosaccharomyces pombe (strain 972 / ATCC 24843) GN=arg5 PE=3 SV=1	954	7	C	565.869	429.647	406.58
sp|O14092|HEM1_SCHPO	hem1	5-aminolevulinate synthase, mitochondrial OS=Schizosaccharomyces pombe (strain 972 / ATCC 24843) GN=hem1 PE=3 SV=1	1	4	C	233.277	177.104	227.914
sp|Q9UT74|LYS4_SCHPO	lys2	Homoaconitase, mitochondrial OS=Schizosaccharomyces pombe (strain 972 / ATCC 24843) GN=lys2 PE=3 SV=1	1016	6	C	232.491	176.39	408.66
sp|Q10055|FAL1_SCHPO	tif412	ATP-dependent RNA helicase fal1 OS=Schizosaccharomyces pombe (strain 972 / ATCC 24843) GN=tif412 PE=1 SV=1	321	3	C	64.2168	48.6808	117.255
sp|P50999|TCPD_SCHPO	cct4	T-complex protein 1 subunit delta OS=Schizosaccharomyces pombe (strain 972 / ATCC 24843) GN=cct4 PE=2 SV=2	77	7	C	539.24	408.721	658.867
sp|Q10253|MUG64_SCHPO	mug64	Meiotically up-regulated gene 64 protein OS=Schizosaccharomyces pombe (strain 972 / ATCC 24843) GN=mug64 PE=1 SV=3	814	6	C	311.122	235.201	431.581
sp|Q9UU99|YJX4_SCHPO	SPCC23B6.04c	CRAL-TRIO domain-containing protein C23B6.04c OS=Schizosaccharomyces pombe (strain 972 / ATCC 24843) GN=SPCC23B6.04c PE=1 SV=1	435	2	C	81.8059	61.8314	80.1479
sp|Q9Y7R8|MDHM_SCHPO	MDH1	Malate dehydrogenase, mitochondrial OS=Schizosaccharomyces pombe (strain 972 / ATCC 24843) GN=MDH1 PE=3 SV=1	649	6	C	567.486	428.719	566.526
sp|O94365|UTP15_SCHPO	utp15	U3 small nucleolar RNA-associated protein 15 OS=Schizosaccharomyces pombe (strain 972 / ATCC 24843) GN=utp15 PE=3 SV=1	1068	5	C	507.918	383.461	318.062
sp|O94609|UBA1_SCHPO	ptr3	Ubiquitin-activating enzyme E1 1 OS=Schizosaccharomyces pombe (strain 972 / ATCC 24843) GN=ptr3 PE=1 SV=1	740	12	C	442.342	333.659	602.032
sp|O94721|YCF9_SCHPO	SPCC1393.09c	RWD domain-containing protein C1393.09c OS=Schizosaccharomyces pombe (strain 972 / ATCC 24843) GN=SPCC1393.09c PE=3 SV=1	888	4	C	316.252	238.481	351.129
sp|Q10107|NEP1_SCHPO	mra1	Ribosomal RNA small subunit methyltransferase mra1 OS=Schizosaccharomyces pombe (strain 972 / ATCC 24843) GN=mra1 PE=1 SV=2	555	12	C	1288.26	971.023	870.844
sp|Q9C100|PMT2_SCHPO	ogm2	Dolichyl-phosphate-mannose--protein mannosyltransferase 2 OS=Schizosaccharomyces pombe (strain 972 / ATCC 24843) GN=ogm2 PE=3 SV=1	445	2	C	124.864	94.0737	151.926
sp|P36602|RIR1_SCHPO	cdc22	Ribonucleoside-diphosphate reductase large chain OS=Schizosaccharomyces pombe (strain 972 / ATCC 24843) GN=cdc22 PE=1 SV=2	149	17	C	1176.47	885.315	1371.88
sp|P78753|ASNS_SCHPO	asn1	Probable asparagine synthetase [glutamine-hydrolyzing] OS=Schizosaccharomyces pombe (strain 972 / ATCC 24843) GN=asn1 PE=1 SV=3	679	12	C	506.91	381.434	886.616
sp|P17610|YPT3_SCHPO	ypt3	GTP-binding protein ypt3 OS=Schizosaccharomyces pombe (strain 972 / ATCC 24843) GN=ypt3 PE=1 SV=1	486	4	C	271.355	204.018	491.514
sp|O13724|ZPR1_SCHPO	zpr1	Zinc finger protein zpr1 OS=Schizosaccharomyces pombe (strain 972 / ATCC 24843) GN=zpr1 PE=3 SV=1	1022	8	C	721.033	541.884	1173.92
sp|O74484|MPG1_SCHPO	mpg1	Mannose-1-phosphate guanyltransferase OS=Schizosaccharomyces pombe (strain 972 / ATCC 24843) GN=mpg1 PE=2 SV=1	280	7	C	326.282	245.124	387.232
sp|O94513|EIF3E_SCHPO	int6	Eukaryotic translation initiation factor 3 subunit E OS=Schizosaccharomyces pombe (strain 972 / ATCC 24843) GN=int6 PE=1 SV=1	831	9	C	692.263	519.747	596.179
sp|O94681|ODO2_SCHPO	kgd2	Probable dihydrolipoyllysine-residue succinyltransferase component of 2-oxoglutarate dehydrogenase complex, mitochondrial OS=Schizosaccharomyces pombe (strain 972 / ATCC 24843) GN=kgd2 PE=3 SV=1	542	9	C	1181.18	884.405	891.342
sp|Q9P6K7|ARC1_SCHPO	SPAC30C2.04	tRNA-aminoacylation cofactor arc1 OS=Schizosaccharomyces pombe (strain 972 / ATCC 24843) GN=SPAC30C2.04 PE=3 SV=1	76	8	C	553.132	413.573	772.522
sp|P87144|SYTC_SCHPO	ths1	Threonine--tRNA ligase, cytoplasmic OS=Schizosaccharomyces pombe (strain 972 / ATCC 24843) GN=ths1 PE=3 SV=1	37	23	C	757.061	565.527	1019.1
sp|O13802|EBP2_SCHPO	ebp2	Probable rRNA-processing protein ebp2 OS=Schizosaccharomyces pombe (strain 972 / ATCC 24843) GN=ebp2 PE=1 SV=1	891	9	C	1164.31	868.751	676.524
sp|P87153|TCPH_SCHPO	cct7	Probable T-complex protein 1 subunit eta OS=Schizosaccharomyces pombe (strain 972 / ATCC 24843) GN=cct7 PE=1 SV=1	481	10	C	665.774	496.561	940.258
sp|O94284|HMT2_SCHPO	hmt2	Sulfide:quinone oxidoreductase, mitochondrial OS=Schizosaccharomyces pombe (strain 972 / ATCC 24843) GN=hmt2 PE=3 SV=1	834	5	C	620.454	462.168	786.629
sp|O60101|PGK_SCHPO	pgk1	Phosphoglycerate kinase OS=Schizosaccharomyces pombe (strain 972 / ATCC 24843) GN=pgk1 PE=1 SV=1	91	17	C	2203.94	1639.68	5668.09
sp|O14148|INO80_SCHPO	ino80	Putative DNA helicase ino80 OS=Schizosaccharomyces pombe (strain 972 / ATCC 24843) GN=ino80 PE=1 SV=4	1302	2	C	67.9483	50.5219	61.6315
sp|Q92399|RPAB3_SCHPO	rpb8	DNA-directed RNA polymerases I, II, and III subunit RPABC3 OS=Schizosaccharomyces pombe (strain 972 / ATCC 24843) GN=rpb8 PE=1 SV=2	875	3	C	336.822	250.394	295.172
sp|O60122|TRPD_SCHPO	trp4	Anthranilate phosphoribosyltransferase OS=Schizosaccharomyces pombe (strain 972 / ATCC 24843) GN=trp4 PE=3 SV=1	141	4	C	255.907	190.229	282.661
sp|O60116|RBSK_SCHPO	SPBC16G5.02c	Putative ribokinase OS=Schizosaccharomyces pombe (strain 972 / ATCC 24843) GN=SPBC16G5.02c PE=3 SV=1	699	3	C	201.147	149.369	225.962
sp|Q9HGL4|TRM6_SCHPO	gcd10	tRNA (adenine(58)-N(1))-methyltransferase non-catalytic subunit trm6 OS=Schizosaccharomyces pombe (strain 972 / ATCC 24843) GN=gcd10 PE=3 SV=1	1100	2	C	145.318	107.888	124.152
sp|P40921|EF1G_SCHPO	tef3	Elongation factor 1-gamma OS=Schizosaccharomyces pombe (strain 972 / ATCC 24843) GN=tef3 PE=1 SV=1	190	19	C	1544.6	1146.68	2075.81
sp|O43051|NOP14_SCHPO	nop14	Probable nucleolar complex protein 14 OS=Schizosaccharomyces pombe (strain 972 / ATCC 24843) GN=nop14 PE=1 SV=1	871	9	C	1043.02	773.147	820.764
sp|O74454|STS5_SCHPO	sts5	Protein sts5 OS=Schizosaccharomyces pombe (strain 972 / ATCC 24843) GN=sts5 PE=1 SV=1	879	3	C	168.539	124.887	118.459
sp|O42952|RS30_SCHPO	rps30a	40S ribosomal protein S30 OS=Schizosaccharomyces pombe (strain 972 / ATCC 24843) GN=rps30a PE=3 SV=2	1148	5	C	452.997	335.06	202.288
sp|O13820|ERG5_SCHPO	erg5	Cytochrome P450 61 OS=Schizosaccharomyces pombe (strain 972 / ATCC 24843) GN=erg5 PE=1 SV=3	204	11	C	678.921	501.797	781.295
sp|O14460|EF2_SCHPO	eft201	Elongation factor 2 OS=Schizosaccharomyces pombe (strain 972 / ATCC 24843) GN=eft201 PE=1 SV=2	200	48	C	3248.73	2397.64	3979.95
sp|Q9UT19|METE_SCHPO	met26	Probable 5-methyltetrahydropteroyltriglutamate--homocysteine methyltransferase OS=Schizosaccharomyces pombe (strain 972 / ATCC 24843) GN=met26 PE=1 SV=1	52	15	C	1027.75	757.537	1856.19
sp|O42947|YBPC_SCHPO	SPBC16H5.12c	Uncharacterized protein C16H5.12c OS=Schizosaccharomyces pombe (strain 972 / ATCC 24843) GN=SPBC16H5.12c PE=1 SV=3	450	19	C	2142.61	1578.43	1266.24
sp|O75005|SYV_SCHPO	vas2	Valine--tRNA ligase OS=Schizosaccharomyces pombe (strain 972 / ATCC 24843) GN=vas2 PE=3 SV=1	1326	5	C	260.197	191.601	351.766
sp|O42932|QCR6_SCHPO	qcr6	Cytochrome b-c1 complex subunit 6 OS=Schizosaccharomyces pombe (strain 972 / ATCC 24843) GN=qcr6 PE=3 SV=1	1543	3	C	196.085	144.321	599.292
sp|O13902|DAK1_SCHPO	dak1	Dihydroxyacetone kinase 1 OS=Schizosaccharomyces pombe (strain 972 / ATCC 24843) GN=dak1 PE=3 SV=1	603	3	C	138.727	101.884	343.289
sp|Q9Y7N0|BDF1_SCHPO	bdf1	SWR1 complex bromodomain subunit bdf1 OS=Schizosaccharomyces pombe (strain 972 / ATCC 24843) GN=bdf1 PE=1 SV=1	390	2	C	138.659	101.77	130.257
sp|Q1K9C2|MET5_SCHPO	sir1	Sulfite reductase [NADPH] subunit beta OS=Schizosaccharomyces pombe (strain 972 / ATCC 24843) GN=sir1 PE=3 SV=1	85	30	C	1244.35	912.569	1478.27
sp|Q10295|PAP_SCHPO	pla1	Poly(A) polymerase pla1 OS=Schizosaccharomyces pombe (strain 972 / ATCC 24843) GN=pla1 PE=1 SV=1	387	2	C	128.795	94.439	137.78
sp|P78812|6PGD_SCHPO	SPBC660.16	6-phosphogluconate dehydrogenase, decarboxylating OS=Schizosaccharomyces pombe (strain 972 / ATCC 24843) GN=SPBC660.16 PE=1 SV=2	868	6	C	548.83	402.407	1096.93
sp|P21696|GPD1_SCHPO	gpd1	Glycerol-3-phosphate dehydrogenase [NAD(+)] 1 OS=Schizosaccharomyces pombe (strain 972 / ATCC 24843) GN=gpd1 PE=1 SV=2	745	2	C	135.885	99.5401	338.279
sp|Q09689|IF5_SCHPO	SPAC2F7.05c	Probable eukaryotic translation initiation factor 5 OS=Schizosaccharomyces pombe (strain 972 / ATCC 24843) GN=SPAC2F7.05c PE=3 SV=1	369	8	C	753.564	551.525	657.547
sp|Q92345|PDC2_SCHPO	SPAC1F8.07c	Probable pyruvate decarboxylase C1F8.07c OS=Schizosaccharomyces pombe (strain 972 / ATCC 24843) GN=SPAC1F8.07c PE=1 SV=3	28	29	C	2416.89	1763.96	4688.39
sp|O59734|RUXF_SCHPO	smf1	Small nuclear ribonucleoprotein F OS=Schizosaccharomyces pombe (strain 972 / ATCC 24843) GN=smf1 PE=1 SV=1	1537	2	C	148.492	108.296	111.869
sp|P33886|WIS1_SCHPO	wis1	Protein kinase wis1 OS=Schizosaccharomyces pombe (strain 972 / ATCC 24843) GN=wis1 PE=1 SV=1	659	2	C	138.125	100.692	145.115
sp|O13914|SYA_SCHPO	ala1	Alanine--tRNA ligase OS=Schizosaccharomyces pombe (strain 972 / ATCC 24843) GN=ala1 PE=1 SV=1	392	15	C	629.087	458.285	981.749
sp|P50521|HXK2_SCHPO	hxk2	Hexokinase-2 OS=Schizosaccharomyces pombe (strain 972 / ATCC 24843) GN=hxk2 PE=2 SV=1	671	6	C	465.788	339.089	1032.6
sp|Q10183|YAW8_SCHPO	SPAC3F10.08c	Uncharacterized protein C3F10.08c OS=Schizosaccharomyces pombe (strain 972 / ATCC 24843) GN=SPAC3F10.08c PE=1 SV=1	1027	2	C	167.989	122.235	99.3523
sp|Q76PD3|DBP6_SCHPO	dbp6	ATP-dependent RNA helicase dbp6 OS=Schizosaccharomyces pombe (strain 972 / ATCC 24843) GN=dbp6 PE=2 SV=1	1186	3	C	296.836	215.799	252.506
sp|Q9UTK4|NU189_SCHPO	nup189	Nucleoporin nup189 OS=Schizosaccharomyces pombe (strain 972 / ATCC 24843) GN=nup189 PE=1 SV=1	799	3	C	179.233	130.166	187.412
sp|P50519|HSP9_SCHPO	hsp9	Heat shock protein hsp9 OS=Schizosaccharomyces pombe (strain 972 / ATCC 24843) GN=hsp9 PE=2 SV=1	1029	2	C	105.338	76.3941	624.132
sp|Q9URY2|ALP7_SCHPO	alp7	Microtubule protein alp7 OS=Schizosaccharomyces pombe (strain 972 / ATCC 24843) GN=alp7 PE=1 SV=1	1709	2	C	181.577	131.675	160.913
sp|Q10281|GBLP_SCHPO	rkp1	Guanine nucleotide-binding protein subunit beta-like protein OS=Schizosaccharomyces pombe (strain 972 / ATCC 24843) GN=rkp1 PE=1 SV=3	439	13	C	1435.48	1040.69	801.08
sp|P05219|TBB_SCHPO	nda3	Tubulin beta chain OS=Schizosaccharomyces pombe (strain 972 / ATCC 24843) GN=nda3 PE=1 SV=2	591	8	C	452.226	327.163	502.823
sp|Q09100|RNP24_SCHPO	rnp24	RNA-binding protein rnp24 OS=Schizosaccharomyces pombe (strain 972 / ATCC 24843) GN=rnp24 PE=3 SV=2	692	5	C	521.018	376.244	392.739
sp|O74400|YOCE_SCHPO	SPBC4F6.14	Uncharacterized RNA-binding protein C4F6.14 OS=Schizosaccharomyces pombe (strain 972 / ATCC 24843) GN=SPBC4F6.14 PE=1 SV=1	618	9	C	887.29	640.169	600.346
sp|Q9URM2|TKT_SCHPO	SPBC2G5.05	Probable transketolase OS=Schizosaccharomyces pombe (strain 972 / ATCC 24843) GN=SPBC2G5.05 PE=2 SV=1	1181	6	C	676.558	487.736	1522.55
sp|Q10343|AAKG_SCHPO	cbs2	5'-AMP-activated protein kinase subunit gamma OS=Schizosaccharomyces pombe (strain 972 / ATCC 24843) GN=cbs2 PE=1 SV=2	1073	2	C	201.231	144.956	200.186
sp|O14150|RS14_SCHPO	rps14a	40S ribosomal protein S14 OS=Schizosaccharomyces pombe (strain 972 / ATCC 24843) GN=rps14a PE=1 SV=1	547	11	C	1342.57	965.714	631.052
sp|Q9P7Q4|SEC18_SCHPO	sec18	Vesicular-fusion protein sec18 OS=Schizosaccharomyces pombe (strain 972 / ATCC 24843) GN=sec18 PE=1 SV=1	284	6	C	312.564	224.664	487.07
sp|P55877|IF1A_SCHPO	tif11	Eukaryotic translation initiation factor 1A OS=Schizosaccharomyces pombe (strain 972 / ATCC 24843) GN=tif11 PE=2 SV=2	995	5	C	520.323	373.898	431.777
sp|O59682|LCB1_SCHPO	lcb1	Serine palmitoyltransferase 1 OS=Schizosaccharomyces pombe (strain 972 / ATCC 24843) GN=lcb1 PE=3 SV=1	356	3	C	97.0374	69.6876	96.2553
sp|P87147|NACA_SCHPO	egd2	Nascent polypeptide-associated complex subunit alpha OS=Schizosaccharomyces pombe (strain 972 / ATCC 24843) GN=egd2 PE=1 SV=1	198	14	C	1553.83	1114.99	1141.62
sp|P36623|PMGY_SCHPO	gpm1	Phosphoglycerate mutase OS=Schizosaccharomyces pombe (strain 972 / ATCC 24843) GN=gpm1 PE=1 SV=1	372	11	C	1147.97	823.203	3519.55
sp|Q09717|RANG_SCHPO	sbp1	Ran-specific GTPase-activating protein 1 OS=Schizosaccharomyces pombe (strain 972 / ATCC 24843) GN=sbp1 PE=1 SV=1	580	3	C	180.163	129.145	419.203
sp|Q09912|PSI1_SCHPO	psi1	Protein psi1 OS=Schizosaccharomyces pombe (strain 972 / ATCC 24843) GN=psi1 PE=2 SV=2	886	10	C	801.393	574.062	1561.84
sp|P87216|VIPI_SCHPO	vip1	Protein vip1 OS=Schizosaccharomyces pombe (strain 972 / ATCC 24843) GN=vip1 PE=1 SV=1	363	5	C	474.482	339.803	1103.61
sp|Q09184|CDB4_SCHPO	cdb4	Curved DNA-binding protein OS=Schizosaccharomyces pombe (strain 972 / ATCC 24843) GN=cdb4 PE=1 SV=1	898	8	C	826.365	591.422	735.323
sp|O13861|TCD_SCHPO	SPAC1A6.10	tRNA threonylcarbamoyladenosine dehydratase OS=Schizosaccharomyces pombe (strain 972 / ATCC 24843) GN=SPAC1A6.10 PE=3 SV=1	846	4	C	154.204	110.328	192.966
sp|P79083|EIF3I_SCHPO	sum1	Eukaryotic translation initiation factor 3 subunit I OS=Schizosaccharomyces pombe (strain 972 / ATCC 24843) GN=sum1 PE=1 SV=1	293	15	C	1068.9	763.957	1009.85
sp|P40373|HIS1_SCHPO	his1	ATP phosphoribosyltransferase OS=Schizosaccharomyces pombe (strain 972 / ATCC 24843) GN=his1 PE=2 SV=1	475	3	C	138.603	99.0305	172.448
sp|O74766|PUT2_SCHPO	SPBC24C6.04	Probable delta-1-pyrroline-5-carboxylate dehydrogenase OS=Schizosaccharomyces pombe (strain 972 / ATCC 24843) GN=SPBC24C6.04 PE=1 SV=1	22	7	C	537.328	382.366	934.479
sp|Q9Y7I8|ZUO1_SCHPO	zuo1	Zuotin OS=Schizosaccharomyces pombe (strain 972 / ATCC 24843) GN=zuo1 PE=1 SV=2	27	18	C	2160.62	1536.85	1589.12
sp|Q10425|EIF3B_SCHPO	SPAC25G10.08	Eukaryotic translation initiation factor 3 subunit B OS=Schizosaccharomyces pombe (strain 972 / ATCC 24843) GN=SPAC25G10.08 PE=1 SV=1	212	44	C	5953.02	4225.46	5029.2
sp|Q9UUM7|HOB3_SCHPO	hob3	Protein hob3 OS=Schizosaccharomyces pombe (strain 972 / ATCC 24843) GN=hob3 PE=1 SV=1	700	10	C	1568.18	1111.55	955.425
sp|Q09722|EIF3M_SCHPO	eif3m	Eukaryotic translation initiation factor 3 subunit M OS=Schizosaccharomyces pombe (strain 972 / ATCC 24843) GN=eif3m PE=1 SV=2	199	16	C	1990.8	1409.86	1577.92
sp|Q9USP8|IDH2_SCHPO	idh2	Isocitrate dehydrogenase [NAD] subunit 2, mitochondrial OS=Schizosaccharomyces pombe (strain 972 / ATCC 24843) GN=idh2 PE=1 SV=2	4	3	C	121.413	85.8243	149.239
sp|Q9URY5|FHP_SCHPO	SPAC869.02c	Flavohemoprotein OS=Schizosaccharomyces pombe (strain 972 / ATCC 24843) GN=SPAC869.02c PE=3 SV=1	1001	2	C	54.6153	38.5547	64.3733
sp|Q9URV6|ATPJ_SCHPO	tim11	ATP synthase subunit e, mitochondrial OS=Schizosaccharomyces pombe (strain 972 / ATCC 24843) GN=tim11 PE=3 SV=3	811	7	C	278.32	196.455	389.873
sp|P00332|ADH_SCHPO	adh1	Alcohol dehydrogenase OS=Schizosaccharomyces pombe (strain 972 / ATCC 24843) GN=adh1 PE=1 SV=2	880	16	C	2051.07	1446.31	2600.85
sp|O94683|RRP7_SCHPO	rrp7	Ribosomal RNA-processing protein 7 OS=Schizosaccharomyces pombe (strain 972 / ATCC 24843) GN=rrp7 PE=3 SV=2	1357	4	C	396.454	279.554	304.093
sp|O42881|APTH1_SCHPO	SPAC8E11.04c	Acyl-protein thioesterase 1 OS=Schizosaccharomyces pombe (strain 972 / ATCC 24843) GN=SPAC8E11.04c PE=3 SV=1	906	2	C	69.548	48.8947	70.4439
sp|Q8TFH3|OST3_SCHPO	ost3	Dolichyl-diphosphooligosaccharide--protein glycosyltransferase subunit 3 OS=Schizosaccharomyces pombe (strain 972 / ATCC 24843) GN=ost3 PE=3 SV=1	350	4	C	956.561	671.043	816.251
sp|Q9UTS7|ASPG2_SCHPO	SPAC977.12	Probable L-asparaginase 2 OS=Schizosaccharomyces pombe (strain 972 / ATCC 24843) GN=SPAC977.12 PE=3 SV=1	1234	4	C	371.493	260.19	263.638
sp|O43007|C1TM_SCHPO	ade9	C-1-tetrahydrofolate synthase, mitochondrial OS=Schizosaccharomyces pombe (strain 972 / ATCC 24843) GN=ade9 PE=3 SV=3	693	14	C	1214.46	850.439	991.971
sp|O13648|ANM3_SCHPO	rmt3	Ribosomal protein arginine N-methyltransferase rmt3 OS=Schizosaccharomyces pombe (strain 972 / ATCC 24843) GN=rmt3 PE=1 SV=3	1278	6	C	287.196	200.932	285.026
sp|O94461|YFFL_SCHPO	SPAC1687.21	Probable phosphatase C1687.21 OS=Schizosaccharomyces pombe (strain 972 / ATCC 24843) GN=SPAC1687.21 PE=3 SV=1	1045	2	C	13.164	9.20931	31.6247
sp|Q09740|GFA1_SCHPO	SPBC12C2.11	Probable glutamine--fructose-6-phosphate aminotransferase [isomerizing] OS=Schizosaccharomyces pombe (strain 972 / ATCC 24843) GN=SPBC12C2.11 PE=3 SV=2	681	4	C	184.096	128.468	146.122
sp|O14370|BCA1_SCHPO	eca39	Branched-chain-amino-acid aminotransferase, mitochondrial OS=Schizosaccharomyces pombe (strain 972 / ATCC 24843) GN=eca39 PE=1 SV=3	968	16	C	1284.75	894.912	1475.99
sp|Q9P6K9|DOHH_SCHPO	lia1	Deoxyhypusine hydroxylase OS=Schizosaccharomyces pombe (strain 972 / ATCC 24843) GN=lia1 PE=3 SV=1	189	2	C	38.8004	26.9515	79.149
sp|O14081|TPSX_SCHPO	SPAC2E11.16c	Putative alpha,alpha-trehalose-phosphate synthase [UDP-forming] 106 kDa subunit OS=Schizosaccharomyces pombe (strain 972 / ATCC 24843) GN=SPAC2E11.16c PE=1 SV=1	1014	10	C	341.284	236.344	372.981
sp|Q10208|KPYK_SCHPO	pyk1	Pyruvate kinase OS=Schizosaccharomyces pombe (strain 972 / ATCC 24843) GN=pyk1 PE=1 SV=1	134	22	C	1538.23	1062.15	2940.09
sp|O13998|OLA1_SCHPO	SPAC27E2.03c	Obg-like ATPase 1 OS=Schizosaccharomyces pombe (strain 972 / ATCC 24843) GN=SPAC27E2.03c PE=1 SV=1	220	13	C	329.671	227.592	547.123
sp|O74969|GHT2_SCHPO	ght2	High-affinity glucose transporter ght2 OS=Schizosaccharomyces pombe (strain 972 / ATCC 24843) GN=ght2 PE=1 SV=1	1174	3	C	124.999	86.0714	156.023
sp|Q09914|RHO1_SCHPO	rho1	GTP-binding protein rho1 OS=Schizosaccharomyces pombe (strain 972 / ATCC 24843) GN=rho1 PE=2 SV=1	1056	3	C	274.486	188.964	345.09
sp|Q9Y7Z3|ACBP_SCHPO	SPBC1539.06	Putative acyl-CoA-binding protein OS=Schizosaccharomyces pombe (strain 972 / ATCC 24843) GN=SPBC1539.06 PE=3 SV=1	902	2	C	126.972	87.1894	354.396
sp|O74778|BTB2_SCHPO	btb2	BTB/POZ domain-containing protein 2 OS=Schizosaccharomyces pombe (strain 972 / ATCC 24843) GN=btb2 PE=1 SV=1	1110	2	C	127.363	87.4452	150.954
sp|P56287|EI2BE_SCHPO	tif225	Probable translation initiation factor eIF-2B subunit epsilon OS=Schizosaccharomyces pombe (strain 972 / ATCC 24843) GN=tif225 PE=1 SV=1	893	6	C	316.85	217.237	242.624
sp|Q9Y7U0|YCJE_SCHPO	SPCC63.14	Uncharacterized protein C63.14 OS=Schizosaccharomyces pombe (strain 972 / ATCC 24843) GN=SPCC63.14 PE=1 SV=1	622	2	C	223.194	152.656	225.39
sp|O74184|WAT1_SCHPO	wat1	WD repeat-containing protein wat1 OS=Schizosaccharomyces pombe (strain 972 / ATCC 24843) GN=wat1 PE=1 SV=1	1487	2	C	110.751	75.3272	114.025
sp|O94523|ACO1_SCHPO	SPCC1281.06c	Probable acyl-CoA desaturase OS=Schizosaccharomyces pombe (strain 972 / ATCC 24843) GN=SPCC1281.06c PE=3 SV=1	1178	6	C	214.805	145.919	240.192
sp|O43024|YGVA_SCHPO	SPBC354.10	CUE domain-containing protein C354.10 OS=Schizosaccharomyces pombe (strain 972 / ATCC 24843) GN=SPBC354.10 PE=1 SV=1	455	16	C	3553.92	2413.39	1840.56
sp|Q10414|MU161_SCHPO	mug161	CWF19-like protein mug161 OS=Schizosaccharomyces pombe (strain 972 / ATCC 24843) GN=mug161 PE=1 SV=1	1663	2	C	141.881	96.344	89.6617
sp|Q9P7B4|YI13_SCHPO	SPAC521.03	Uncharacterized oxidoreductase C521.03 OS=Schizosaccharomyces pombe (strain 972 / ATCC 24843) GN=SPAC521.03 PE=1 SV=1	1581	2	C	77.8574	52.8426	122.642
sp|Q9Y7L1|YGI9_SCHPO	SPBC2A9.09	Phosducin-like protein C2A9.09 OS=Schizosaccharomyces pombe (strain 972 / ATCC 24843) GN=SPBC2A9.09 PE=1 SV=2	732	4	C	211.774	143.283	280.205
sp|O60198|METK_SCHPO	sam1	S-adenosylmethionine synthase OS=Schizosaccharomyces pombe (strain 972 / ATCC 24843) GN=sam1 PE=3 SV=1	358	9	C	715.754	484.055	1151.02
sp|P87313|TMA20_SCHPO	tma20	Translation machinery-associated protein 20 OS=Schizosaccharomyces pombe (strain 972 / ATCC 24843) GN=tma20 PE=3 SV=5	1116	4	C	263.289	177.952	257.432
sp|O94602|YC8F_SCHPO	SPCC622.15c	Uncharacterized protein C622.15c OS=Schizosaccharomyces pombe (strain 972 / ATCC 24843) GN=SPCC622.15c PE=4 SV=1	324	3	C	302.51	204.37	183.327
sp|Q09820|RENT1_SCHPO	upf1	ATP-dependent helicase upf1 OS=Schizosaccharomyces pombe (strain 972 / ATCC 24843) GN=upf1 PE=3 SV=2	1122	3	C	119.204	80.4139	89.6083
sp|Q9P6R6|ATPD_SCHPO	atp16	ATP synthase subunit delta, mitochondrial OS=Schizosaccharomyces pombe (strain 972 / ATCC 24843) GN=atp16 PE=3 SV=2	1394	2	C	135.373	91.1888	224.679
sp|P78810|VTC4_SCHPO	vtc4	Vacuolar transporter chaperone 4 OS=Schizosaccharomyces pombe (strain 972 / ATCC 24843) GN=vtc4 PE=1 SV=2	901	13	C	753.409	506.533	571.67
sp|P78811|UGPA1_SCHPO	fuy1	Probable UTP--glucose-1-phosphate uridylyltransferase OS=Schizosaccharomyces pombe (strain 972 / ATCC 24843) GN=fuy1 PE=1 SV=2	691	22	C	1262.46	846.13	1497.08
sp|O59827|GST2_SCHPO	gst2	Glutathione S-transferase 2 OS=Schizosaccharomyces pombe (strain 972 / ATCC 24843) GN=gst2 PE=2 SV=1	605	4	C	78.174	52.2998	206.14
sp|Q9USI5|STI1_SCHPO	sti1	Heat shock protein sti1 homolog OS=Schizosaccharomyces pombe (strain 972 / ATCC 24843) GN=sti1 PE=3 SV=1	298	15	C	1210.97	806.435	3725.31
sp|Q09871|YAG7_SCHPO	SPAC12G12.07c	Uncharacterized protein C12G12.07c OS=Schizosaccharomyces pombe (strain 972 / ATCC 24843) GN=SPAC12G12.07c PE=4 SV=1	569	7	C	771.03	513.427	426.811
sp|P40231|CSK2A_SCHPO	cka1	Casein kinase II subunit alpha OS=Schizosaccharomyces pombe (strain 972 / ATCC 24843) GN=cka1 PE=2 SV=2	1586	6	C	467.84	311.11	316.754
sp|Q9Y7U7|SND1_SCHPO	snd1	Staphylococcal nuclease domain-containing protein 1 OS=Schizosaccharomyces pombe (strain 972 / ATCC 24843) GN=snd1 PE=1 SV=1	828	25	C	3033.61	2013.87	1320.22
sp|P87115|YDK9_SCHPO	SPAC20G8.09c	UPF0202 protein C20G8.09c OS=Schizosaccharomyces pombe (strain 972 / ATCC 24843) GN=SPAC20G8.09c PE=3 SV=1	20	20	C	1960.65	1300.96	1383.26
sp|P18253|CYPH_SCHPO	ppi1	Peptidyl-prolyl cis-trans isomerase OS=Schizosaccharomyces pombe (strain 972 / ATCC 24843) GN=ppi1 PE=3 SV=1	1124	2	C	218.8	144.995	474.349
sp|P40375|MAOX_SCHPO	mae2	NAD-dependent malic enzyme OS=Schizosaccharomyces pombe (strain 972 / ATCC 24843) GN=mae2 PE=1 SV=1	65	11	C	874.247	579.051	1840.12
sp|Q1MTS0|YBH9_SCHPO	SPBC3B8.09	Uncharacterized protein C3B8.09 OS=Schizosaccharomyces pombe (strain 972 / ATCC 24843) GN=SPBC3B8.09 PE=1 SV=1	1150	6	C	1007.64	667.091	770.644
sp|O13741|NOP12_SCHPO	nop12	Nucleolar protein 12 OS=Schizosaccharomyces pombe (strain 972 / ATCC 24843) GN=nop12 PE=1 SV=1	253	9	C	1404.55	926.911	981.064
sp|Q9UTJ2|PMM_SCHPO	pmm1	Phosphomannomutase OS=Schizosaccharomyces pombe (strain 972 / ATCC 24843) GN=pmm1 PE=2 SV=1	946	5	C	352.578	232.601	649.025
sp|O74429|VIP1_SCHPO	asp1	Inositol hexakisphosphate and diphosphoinositol-pentakisphosphate kinase OS=Schizosaccharomyces pombe (strain 972 / ATCC 24843) GN=asp1 PE=1 SV=1	749	5	C	345.896	227.978	321.089
sp|O94259|UTP16_SCHPO	utp16	Probable U3 small nucleolar RNA-associated protein 16 OS=Schizosaccharomyces pombe (strain 972 / ATCC 24843) GN=utp16 PE=1 SV=2	1049	4	C	289.067	190.22	104.441
sp|O13742|VPH1_SCHPO	vph1	V-type proton ATPase subunit a OS=Schizosaccharomyces pombe (strain 972 / ATCC 24843) GN=vph1 PE=3 SV=2	1210	2	C	148.193	97.5163	153.662
sp|Q9USW1|YHZ3_SCHPO	SPBC21B10.03c	Uncharacterized protein C21B10.03c OS=Schizosaccharomyces pombe (strain 972 / ATCC 24843) GN=SPBC21B10.03c PE=4 SV=1	539	3	C	388.786	255.468	269.827
sp|O13718|VTC2_SCHPO	vtc2	Vacuolar transporter chaperone 2 OS=Schizosaccharomyces pombe (strain 972 / ATCC 24843) GN=vtc2 PE=1 SV=1	1133	8	C	658.096	432.29	540.151
sp|P40370|ENO11_SCHPO	eno101	Enolase 1-1 OS=Schizosaccharomyces pombe (strain 972 / ATCC 24843) GN=eno101 PE=1 SV=2	8	15	C	1203.72	789.424	2690.74
sp|O14104|LYS12_SCHPO	lys12	Homoisocitrate dehydrogenase OS=Schizosaccharomyces pombe (strain 972 / ATCC 24843) GN=lys12 PE=1 SV=1	1183	5	C	651.217	426.091	683.281
sp|O59711|LYS9_SCHPO	lys9	Saccharopine dehydrogenase [NADP(+), L-glutamate-forming] OS=Schizosaccharomyces pombe (strain 972 / ATCC 24843) GN=lys9 PE=3 SV=1	125	12	C	450.057	294.323	759.643
sp|Q09173|PP2C3_SCHPO	ptc3	Protein phosphatase 2C homolog 3 OS=Schizosaccharomyces pombe (strain 972 / ATCC 24843) GN=ptc3 PE=3 SV=1	307	3	C	184.03	119.985	187.723
sp|Q9P4X4|SEC17_SCHPO	sec17	Probable vesicular-fusion protein sec17 homolog OS=Schizosaccharomyces pombe (strain 972 / ATCC 24843) GN=sec17 PE=1 SV=1	43	2	C	34.8	22.6651	60.7752
sp|O42661|SMD1_SCHPO	smd1	Small nuclear ribonucleoprotein Sm D1 OS=Schizosaccharomyces pombe (strain 972 / ATCC 24843) GN=smd1 PE=1 SV=1	1471	2	C	76.1887	49.6197	48.2148
sp|Q9C1X1|PWP2_SCHPO	SPBC713.04c	Periodic tryptophan protein 2 homolog OS=Schizosaccharomyces pombe (strain 972 / ATCC 24843) GN=SPBC713.04c PE=1 SV=1	801	7	C	890.102	579.584	526.782
sp|O13972|GLYD_SCHPO	SPAC24C9.12c	Probable serine hydroxymethyltransferase, cytosolic OS=Schizosaccharomyces pombe (strain 972 / ATCC 24843) GN=SPAC24C9.12c PE=3 SV=1	330	20	C	1620.9	1055.39	1660.31
sp|O74173|EF1B_SCHPO	tef5	Elongation factor 1-beta OS=Schizosaccharomyces pombe (strain 972 / ATCC 24843) GN=tef5 PE=2 SV=1	585	12	C	1061.8	690.837	1658.19
sp|Q10344|TCTP_SCHPO	p23fy	Translationally-controlled tumor protein homolog OS=Schizosaccharomyces pombe (strain 972 / ATCC 24843) GN=p23fy PE=1 SV=1	850	3	C	282.692	183.926	505.1
sp|Q10066|ARGI2_SCHPO	aru1	Arginase OS=Schizosaccharomyces pombe (strain 972 / ATCC 24843) GN=aru1 PE=3 SV=1	250	6	C	506.362	329.249	1261.72
sp|O94634|THDH_SCHPO	SPBC1677.03c	Threonine dehydratase, mitochondrial OS=Schizosaccharomyces pombe (strain 972 / ATCC 24843) GN=SPBC1677.03c PE=3 SV=1	541	5	C	182.82	118.716	181.959
sp|O74835|RRP5_SCHPO	rrp5	rRNA biogenesis protein rrp5 OS=Schizosaccharomyces pombe (strain 972 / ATCC 24843) GN=rrp5 PE=1 SV=1	195	33	C	4791.68	3106.78	3201.02
sp|O60055|UTP20_SCHPO	utp20	U3 small nucleolar RNA-associated protein 20 OS=Schizosaccharomyces pombe (strain 972 / ATCC 24843) GN=utp20 PE=3 SV=1	184	10	C	787.238	509.706	625.631
sp|O94465|CMS1_SCHPO	cms1	Protein cms1 OS=Schizosaccharomyces pombe (strain 972 / ATCC 24843) GN=cms1 PE=3 SV=1	532	7	C	514.171	332.888	337.604
sp|O14466|DPM1_SCHPO	dpm1	Dolichol-phosphate mannosyltransferase OS=Schizosaccharomyces pombe (strain 972 / ATCC 24843) GN=dpm1 PE=2 SV=1	1393	2	C	41.7402	27.0223	60.6477
sp|P40387|TPS1_SCHPO	tps1	Alpha,alpha-trehalose-phosphate synthase [UDP-forming] OS=Schizosaccharomyces pombe (strain 972 / ATCC 24843) GN=tps1 PE=1 SV=2	55	10	C	562.31	363.768	791.421
sp|Q9P7R4|UBC8_SCHPO	ubc8	Ubiquitin-conjugating enzyme E2 8 OS=Schizosaccharomyces pombe (strain 972 / ATCC 24843) GN=ubc8 PE=3 SV=1	1439	2	C	144.642	93.4887	93.3969
sp|Q92370|TRPG_SCHPO	trp1	Multifunctional tryptophan biosynthesis protein OS=Schizosaccharomyces pombe (strain 972 / ATCC 24843) GN=trp1 PE=2 SV=2	677	7	C	287.984	185.978	327.075
sp|O74378|ODO1_SCHPO	kgd1	2-oxoglutarate dehydrogenase, mitochondrial OS=Schizosaccharomyces pombe (strain 972 / ATCC 24843) GN=kgd1 PE=3 SV=1	1235	10	C	1015.8	654.034	722.093
sp|Q9UR17|VTC1_SCHPO	nrf1	Vacuolar transporter chaperone 1 OS=Schizosaccharomyces pombe (strain 972 / ATCC 24843) GN=nrf1 PE=2 SV=1	1558	2	C	161.754	103.794	88.7904
sp|Q9C102|GLT1_SCHPO	glt1	Putative glutamate synthase [NADPH] OS=Schizosaccharomyces pombe (strain 972 / ATCC 24843) GN=glt1 PE=2 SV=1	86	17	C	1264.34	810.211	1384.1
sp|O42945|DHX15_SCHPO	prp43	Probable pre-mRNA-splicing factor ATP-dependent RNA helicase prp43 OS=Schizosaccharomyces pombe (strain 972 / ATCC 24843) GN=prp43 PE=3 SV=1	138	11	C	1234.13	790.846	654.722
sp|O74340|DCA13_SCHPO	sof1	Protein sof1 OS=Schizosaccharomyces pombe (strain 972 / ATCC 24843) GN=sof1 PE=3 SV=1	274	2	C	399.621	256.051	183.889
sp|O13966|ACON_SCHPO	SPAC24C9.06c	Aconitate hydratase, mitochondrial OS=Schizosaccharomyces pombe (strain 972 / ATCC 24843) GN=SPAC24C9.06c PE=3 SV=2	696	5	C	272.259	174.348	449.17
sp|O74958|MMI1_SCHPO	mmi1	YTH domain-containing protein mmi1 OS=Schizosaccharomyces pombe (strain 972 / ATCC 24843) GN=mmi1 PE=1 SV=3	1419	4	C	250.553	160.121	160.199
sp|O14055|SYYC_SCHPO	tys1	Tyrosine--tRNA ligase, cytoplasmic OS=Schizosaccharomyces pombe (strain 972 / ATCC 24843) GN=tys1 PE=3 SV=1	224	14	C	610.472	389.665	799.495
sp|O43030|FES1_SCHPO	fes1	Hsp70 nucleotide exchange factor fes1 OS=Schizosaccharomyces pombe (strain 972 / ATCC 24843) GN=fes1 PE=1 SV=1	187	9	C	307.09	195.999	549.421
sp|O14293|YF19_SCHPO	SPAC9E9.09c	Putative aldehyde dehydrogenase-like protein C9E9.09c OS=Schizosaccharomyces pombe (strain 972 / ATCC 24843) GN=SPAC9E9.09c PE=1 SV=1	25	10	C	621.243	396.457	1247.75
sp|O42938|PFKA_SCHPO	pfk1	ATP-dependent 6-phosphofructokinase OS=Schizosaccharomyces pombe (strain 972 / ATCC 24843) GN=pfk1 PE=1 SV=1	261	25	C	2880.27	1838.01	3765.21
sp|P87128|EIF3J_SCHPO	SPAC3A12.13c	Probable eukaryotic translation initiation factor 3 subunit J OS=Schizosaccharomyces pombe (strain 972 / ATCC 24843) GN=SPAC3A12.13c PE=1 SV=2	119	4	C	1019.46	650.489	641.539
sp|O14248|TEA3_SCHPO	tea3	Tip elongation aberrant protein 3 OS=Schizosaccharomyces pombe (strain 972 / ATCC 24843) GN=tea3 PE=1 SV=1	613	3	C	242.826	154.824	174.415
sp|O42877|FCF2_SCHPO	fcf2	rRNA-processing protein fcf2 OS=Schizosaccharomyces pombe (strain 972 / ATCC 24843) GN=fcf2 PE=3 SV=1	1303	2	C	225.593	143.753	154.31
sp|O59771|KCY_SCHPO	SPCC1795.05c	Uridylate kinase OS=Schizosaccharomyces pombe (strain 972 / ATCC 24843) GN=SPCC1795.05c PE=3 SV=1	517	4	C	117.519	74.7696	160.938
sp|P17609|YPT2_SCHPO	ypt2	GTP-binding protein ypt2 OS=Schizosaccharomyces pombe (strain 972 / ATCC 24843) GN=ypt2 PE=3 SV=1	1070	2	C	162.874	103.604	185.946
sp|Q9P7Y7|P5CR_SCHPO	pro3	Pyrroline-5-carboxylate reductase OS=Schizosaccharomyces pombe (strain 972 / ATCC 24843) GN=pro3 PE=3 SV=1	1072	3	C	84.6924	53.8646	62.7285
sp|O36018|BUD22_SCHPO	SPAC4F10.06	BUD22 family protein C4F10.06 OS=Schizosaccharomyces pombe (strain 972 / ATCC 24843) GN=SPAC4F10.06 PE=3 SV=1	500	6	C	507.819	322.958	271.196
sp|P36579|ARF1_SCHPO	arf1	ADP-ribosylation factor 1 OS=Schizosaccharomyces pombe (strain 972 / ATCC 24843) GN=arf1 PE=2 SV=2	625	8	C	333.97	212.391	397.794
sp|O74755|PST3_SCHPO	pst3	Paired amphipathic helix protein pst3 OS=Schizosaccharomyces pombe (strain 972 / ATCC 24843) GN=pst3 PE=3 SV=1	1113	2	C	60.271	38.2591	50.4393
sp|O94236|EIF3D_SCHPO	moe1	Eukaryotic translation initiation factor 3 subunit D OS=Schizosaccharomyces pombe (strain 972 / ATCC 24843) GN=moe1 PE=1 SV=1	378	16	C	1639.16	1039.73	1122.87
sp|O59702|CLR6_SCHPO	clr6	Histone deacetylase clr6 OS=Schizosaccharomyces pombe (strain 972 / ATCC 24843) GN=clr6 PE=1 SV=1	1557	3	C	195.306	123.666	200.335
sp|P31406|VATA_SCHPO	vma1	V-type proton ATPase catalytic subunit A OS=Schizosaccharomyces pombe (strain 972 / ATCC 24843) GN=vma1 PE=3 SV=1	63	13	C	452.705	286.597	527.958
sp|Q96WV0|UREG_SCHPO	SPCPB16A4.05c	Uncharacterized urease accessory protein ureG-like OS=Schizosaccharomyces pombe (strain 972 / ATCC 24843) GN=SPCPB16A4.05c PE=3 SV=1	216	6	C	464.972	293.687	395.799
sp|Q09870|RCL1_SCHPO	SPAC12G12.06c	Probable RNA 3'-terminal phosphate cyclase-like protein OS=Schizosaccharomyces pombe (strain 972 / ATCC 24843) GN=SPAC12G12.06c PE=3 SV=1	1031	2	C	260.16	164.302	258.266
sp|O14344|IMDH_SCHPO	gua1	Inosine-5'-monophosphate dehydrogenase OS=Schizosaccharomyces pombe (strain 972 / ATCC 24843) GN=gua1 PE=2 SV=1	651	10	C	446.964	281.458	712.693
sp|O60094|DPO5_SCHPO	pol5	DNA polymerase V OS=Schizosaccharomyces pombe (strain 972 / ATCC 24843) GN=pol5 PE=1 SV=2	548	8	C	897	563.975	642.216
sp|O14289|LEUC_SCHPO	leu2	3-isopropylmalate dehydratase OS=Schizosaccharomyces pombe (strain 972 / ATCC 24843) GN=leu2 PE=1 SV=1	251	17	C	527.696	331.698	681.727
sp|P78917|G6PI_SCHPO	pgi1	Glucose-6-phosphate isomerase OS=Schizosaccharomyces pombe (strain 972 / ATCC 24843) GN=pgi1 PE=1 SV=2	623	6	C	371.332	232.707	734.313
sp|P78921|TCPQ_SCHPO	cct8	Probable T-complex protein 1 subunit theta OS=Schizosaccharomyces pombe (strain 972 / ATCC 24843) GN=cct8 PE=2 SV=3	291	16	C	1332.14	834.585	1596.09
sp|Q09799|KRI1_SCHPO	kri1	Protein kri1 OS=Schizosaccharomyces pombe (strain 972 / ATCC 24843) GN=kri1 PE=1 SV=1	636	11	C	1783.91	1117.24	922.529
sp|Q9UTN2|YII1_SCHPO	SPAC139.01c	Uncharacterized protein C139.01c OS=Schizosaccharomyces pombe (strain 972 / ATCC 24843) GN=SPAC139.01c PE=1 SV=2	522	6	C	442.776	276.714	350.719
sp|O42649|SMC3_SCHPO	psm3	Structural maintenance of chromosomes protein 3 OS=Schizosaccharomyces pombe (strain 972 / ATCC 24843) GN=psm3 PE=1 SV=1	150	2	C	97.6004	60.9382	71.9995
sp|O43003|MMF1_SCHPO	mmf1	Protein mmf1, mitochondrial OS=Schizosaccharomyces pombe (strain 972 / ATCC 24843) GN=mmf1 PE=3 SV=1	1467	2	C	94.2322	58.8298	166.428
sp|O13907|ACL2_SCHPO	SPAC22A12.16	Probable ATP-citrate synthase subunit 2 OS=Schizosaccharomyces pombe (strain 972 / ATCC 24843) GN=SPAC22A12.16 PE=1 SV=1	258	13	C	742.668	463.411	936.949
sp|P78854|PLB1_SCHPO	plb1	Lysophospholipase 1 OS=Schizosaccharomyces pombe (strain 972 / ATCC 24843) GN=plb1 PE=2 SV=2	422	5	C	205.125	127.901	316.59
sp|P78937|MET3_SCHPO	sua1	Sulfate adenylyltransferase OS=Schizosaccharomyces pombe (strain 972 / ATCC 24843) GN=sua1 PE=1 SV=2	257	5	C	211.621	131.786	351.865
sp|Q9UT09|AROG_SCHPO	aro4	Phospho-2-dehydro-3-deoxyheptonate aldolase, tyrosine-inhibited OS=Schizosaccharomyces pombe (strain 972 / ATCC 24843) GN=aro4 PE=3 SV=1	978	3	C	222.621	138.411	453.807
sp|Q10270|MET16_SCHPO	met16	Probable phosphoadenosine phosphosulfate reductase OS=Schizosaccharomyces pombe (strain 972 / ATCC 24843) GN=met16 PE=3 SV=1	1077	3	C	113.895	70.6374	161.903
sp|P29458|MCM4_SCHPO	mcm4	DNA replication licensing factor mcm4 OS=Schizosaccharomyces pombe (strain 972 / ATCC 24843) GN=mcm4 PE=1 SV=2	867	3	C	238.971	147.641	200.362
sp|P78761|QCR2_SCHPO	qcr2	Cytochrome b-c1 complex subunit 2, mitochondrial OS=Schizosaccharomyces pombe (strain 972 / ATCC 24843) GN=qcr2 PE=2 SV=2	536	8	C	311.018	192.12	470.604
sp|Q9UUA1|YJX1_SCHPO	SPCC23B6.01c	Oxysterol-binding protein homolog C23B6.01c OS=Schizosaccharomyces pombe (strain 972 / ATCC 24843) GN=SPCC23B6.01c PE=1 SV=2	616	7	C	482.185	297.507	622.955
sp|P87137|YDM6_SCHPO	SPAC57A7.06	Uncharacterized protein C57A7.06 OS=Schizosaccharomyces pombe (strain 972 / ATCC 24843) GN=SPAC57A7.06 PE=1 SV=1	175	12	C	1342.71	828.367	934.597
sp|Q9P377|BGS3_SCHPO	bgs3	1,3-beta-glucan synthase component bgs3 OS=Schizosaccharomyces pombe (strain 972 / ATCC 24843) GN=bgs3 PE=1 SV=1	741	6	C	456.777	281.2	322.095
sp|O74887|TSA1_SCHPO	tpx1	Peroxiredoxin tpx1 OS=Schizosaccharomyces pombe (strain 972 / ATCC 24843) GN=tpx1 PE=1 SV=1	870	9	C	1409.52	867.039	1837.86
sp|O94273|PPIB_SCHPO	cyp4	Peptidyl-prolyl cis-trans isomerase B OS=Schizosaccharomyces pombe (strain 972 / ATCC 24843) GN=cyp4 PE=3 SV=1	1580	4	C	209.6	128.636	528.62
sp|O14307|TRM61_SCHPO	cpd1	tRNA (adenine(58)-N(1))-methyltransferase catalytic subunit trm61 OS=Schizosaccharomyces pombe (strain 972 / ATCC 24843) GN=cpd1 PE=3 SV=1	940	2	C	215.198	131.939	119.516
sp|O60188|UTP6_SCHPO	utp6	U3 small nucleolar RNA-associated protein 6 OS=Schizosaccharomyces pombe (strain 972 / ATCC 24843) GN=utp6 PE=3 SV=1	664	10	C	898.873	550.992	538.451
sp|O94653|BMS1_SCHPO	bms1	Ribosome biogenesis protein bms1 OS=Schizosaccharomyces pombe (strain 972 / ATCC 24843) GN=bms1 PE=1 SV=2	36	21	C	2213.45	1353.68	1708.5
sp|O94442|NBP35_SCHPO	nbp35	Cytosolic Fe-S cluster assembly factor nbp35 OS=Schizosaccharomyces pombe (strain 972 / ATCC 24843) GN=nbp35 PE=3 SV=1	1170	3	C	181.547	110.513	168.382
sp|Q9P7L5|OAT_SCHPO	car2	Ornithine aminotransferase car2 OS=Schizosaccharomyces pombe (strain 972 / ATCC 24843) GN=car2 PE=2 SV=1	80	10	C	882.395	536.932	1624.71
sp|O60064|YBB2_SCHPO	SPBC13G1.02	Probable mannose-1-phosphate guanyltransferase OS=Schizosaccharomyces pombe (strain 972 / ATCC 24843) GN=SPBC13G1.02 PE=3 SV=1	341	4	C	116.551	70.8939	147.84
sp|Q9P775|YBEG_SCHPO	SPBC1711.16	Uncharacterized WD repeat-containing protein C17D11.16 OS=Schizosaccharomyces pombe (strain 972 / ATCC 24843) GN=SPBC1711.16 PE=1 SV=1	105	6	C	788.396	478.84	550.002
sp|O74534|SLY1_SCHPO	sly1	Protein sly1 OS=Schizosaccharomyces pombe (strain 972 / ATCC 24843) GN=sly1 PE=3 SV=1	265	8	C	589.031	357.07	522.884
sp|Q9Y7R7|RL1DA_SCHPO	SPCC306.07c	Putative ribosome biogenesis protein C306.07c OS=Schizosaccharomyces pombe (strain 972 / ATCC 24843) GN=SPCC306.07c PE=3 SV=1	374	3	C	446.664	270.117	319.234
sp|Q9URX8|NG06_SCHPO	SPAC890.06	Probable nucleoporin C890.06 OS=Schizosaccharomyces pombe (strain 972 / ATCC 24843) GN=SPAC890.06 PE=3 SV=3	1382	6	C	331.934	200.121	246.269
sp|Q10170|RMT2_SCHPO	rmt2	Protein arginine N-methyltransferase 2 OS=Schizosaccharomyces pombe (strain 972 / ATCC 24843) GN=rmt2 PE=3 SV=2	1011	3	C	137.807	83.02	162.29
sp|O13835|IMP3_SCHPO	imp3	U3 small nucleolar ribonucleoprotein protein imp3 OS=Schizosaccharomyces pombe (strain 972 / ATCC 24843) GN=imp3 PE=3 SV=1	1405	2	C	279.286	168.165	155.518
sp|O94676|UTP22_SCHPO	utp22	U3 small nucleolar RNA-associated protein 22 OS=Schizosaccharomyces pombe (strain 972 / ATCC 24843) GN=utp22 PE=3 SV=1	504	5	C	546.45	328.855	455.525
sp|Q9Y823|HOSM_SCHPO	lys4	Homocitrate synthase, mitochondrial OS=Schizosaccharomyces pombe (strain 972 / ATCC 24843) GN=lys4 PE=1 SV=1	314	12	C	732.649	436.935	854.062
sp|Q9Y7Y8|SYQ_SCHPO	qrs1	Probable glutamine--tRNA ligase OS=Schizosaccharomyces pombe (strain 972 / ATCC 24843) GN=qrs1 PE=3 SV=1	959	3	C	75.7246	45.0665	91.7295
sp|O74178|KES1_SCHPO	kes1	Protein kes1 OS=Schizosaccharomyces pombe (strain 972 / ATCC 24843) GN=kes1 PE=2 SV=2	552	2	C	207.01	122.728	226.403
sp|Q9HGL3|SUM2_SCHPO	sum2	Protein sum2 OS=Schizosaccharomyces pombe (strain 972 / ATCC 24843) GN=sum2 PE=1 SV=1	1526	3	C	197.413	116.665	162.785
sp|O43005|AP2B_SCHPO	apl1	AP-2 complex subunit beta OS=Schizosaccharomyces pombe (strain 972 / ATCC 24843) GN=apl1 PE=3 SV=1	1372	3	C	160.698	94.6845	93.6638
sp|Q9UTP9|DBP4_SCHPO	dbp4	ATP-dependent RNA helicase dbp4 OS=Schizosaccharomyces pombe (strain 972 / ATCC 24843) GN=dbp4 PE=1 SV=1	975	2	C	80.5596	47.4079	41.6363
sp|Q9HFE6|YNW6_SCHPO	SPBP16F5.06	Uncharacterized RNA-binding protein P16F5.06 OS=Schizosaccharomyces pombe (strain 972 / ATCC 24843) GN=SPBP16F5.06 PE=1 SV=1	950	3	C	343.962	202.41	220.352
sp|O36021|YEK9_SCHPO	SPAC4F10.09c	Uncharacterized protein C4F10.09c OS=Schizosaccharomyces pombe (strain 972 / ATCC 24843) GN=SPAC4F10.09c PE=1 SV=1	344	12	C	1323.21	778.389	739.311
sp|Q9UUK7|PUR3_SCHPO	ade5	Phosphoribosylglycinamide formyltransferase OS=Schizosaccharomyces pombe (strain 972 / ATCC 24843) GN=ade5 PE=2 SV=1	180	5	C	110.464	64.7941	162.847
sp|Q9USZ4|RPA34_SCHPO	rpa34	DNA-directed RNA polymerase I subunit rpa34 OS=Schizosaccharomyces pombe (strain 972 / ATCC 24843) GN=rpa34 PE=1 SV=1	958	3	C	250.386	146.861	187.184
sp|O14080|YEAF_SCHPO	SPAC2E11.15	Uncharacterized protein UNK4,15 OS=Schizosaccharomyces pombe (strain 972 / ATCC 24843) GN=SPAC2E11.15 PE=4 SV=1	1626	2	C	91.8203	53.8148	124.791
sp|O74511|EKC1_SCHPO	ekc1	Extragenic suppressor of kinetochore protein 1 OS=Schizosaccharomyces pombe (strain 972 / ATCC 24843) GN=ekc1 PE=1 SV=2	312	2	C	117.563	68.7165	70.7245
sp|Q9P6Q5|DUT_SCHPO	SPAC644.05c	Probable deoxyuridine 5'-triphosphate nucleotidohydrolase OS=Schizosaccharomyces pombe (strain 972 / ATCC 24843) GN=SPAC644.05c PE=3 SV=1	1686	2	C	10.582	6.17667	38.2488
sp|Q09867|EFG1P_SCHPO	efg1	rRNA-processing protein efg1 OS=Schizosaccharomyces pombe (strain 972 / ATCC 24843) GN=efg1 PE=3 SV=2	1007	6	C	648.653	378.414	297.743
sp|P87177|YB1C_SCHPO	SPBC3D6.12	Uncharacterized WD repeat-containing protein C3D6.12 OS=Schizosaccharomyces pombe (strain 972 / ATCC 24843) GN=SPBC3D6.12 PE=1 SV=1	206	13	C	1420.59	827.211	877.444
sp|O13639|SAHH_SCHPO	pi047	Adenosylhomocysteinase OS=Schizosaccharomyces pombe (strain 972 / ATCC 24843) GN=pi047 PE=3 SV=1	1475	5	C	333.595	194.171	542.323
sp|O94671|DHOM_SCHPO	SPBC776.03	Probable homoserine dehydrogenase OS=Schizosaccharomyces pombe (strain 972 / ATCC 24843) GN=SPBC776.03 PE=1 SV=1	208	6	C	346.083	199.821	829.096
sp|O74975|PCY1_SCHPO	SPCC1827.02c	Probable choline-phosphate cytidylyltransferase OS=Schizosaccharomyces pombe (strain 972 / ATCC 24843) GN=SPCC1827.02c PE=1 SV=3	991	3	C	173.812	100.261	135.302
sp|O74475|BGS4_SCHPO	bgs4	1,3-beta-glucan synthase component bgs4 OS=Schizosaccharomyces pombe (strain 972 / ATCC 24843) GN=bgs4 PE=1 SV=1	741	10	C	618.664	356.496	427.21
sp|O74777|KRR1_SCHPO	mis3	KRR1 small subunit processome component homolog OS=Schizosaccharomyces pombe (strain 972 / ATCC 24843) GN=mis3 PE=3 SV=1	192	8	C	2039.21	1171.28	1181.13
sp|Q9UUC2|YGR1_SCHPO	SPBC365.01	CRAL-TRIO domain-containing protein C365.01 OS=Schizosaccharomyces pombe (strain 972 / ATCC 24843) GN=SPBC365.01 PE=2 SV=1	469	2	C	104.971	60.1188	115.076
sp|P87308|LSB5_SCHPO	lsb5	Protein lsb5 OS=Schizosaccharomyces pombe (strain 972 / ATCC 24843) GN=lsb5 PE=3 SV=1	433	4	C	175.377	99.9344	120.087
sp|Q9UTA6|YL8C_SCHPO	SPAC25B8.12c	Uncharacterized hydrolase C25B8.12c OS=Schizosaccharomyces pombe (strain 972 / ATCC 24843) GN=SPAC25B8.12c PE=1 SV=1	1211	4	C	186.173	105.813	495.563
sp|O14301|YE85_SCHPO	SPAC9G1.05	Uncharacterized WD repeat-containing protein C9G1.05 OS=Schizosaccharomyces pombe (strain 972 / ATCC 24843) GN=SPAC9G1.05 PE=3 SV=1	746	2	C	224.344	127.432	134.541
sp|O14368|HSP16_SCHPO	hsp16	Heat shock protein 16 OS=Schizosaccharomyces pombe (strain 972 / ATCC 24843) GN=hsp16 PE=1 SV=1	836	7	C	396.952	225.041	517.057
sp|Q9HE11|UTP5_SCHPO	utp5	U3 small nucleolar RNA-associated protein 5 OS=Schizosaccharomyces pombe (strain 972 / ATCC 24843) GN=utp5 PE=3 SV=2	1155	7	C	845.012	478.741	396.185
sp|O13910|MPP10_SCHPO	mpp10	U3 small nucleolar ribonucleoprotein protein mpp10 OS=Schizosaccharomyces pombe (strain 972 / ATCC 24843) GN=mpp10 PE=1 SV=1	619	6	C	949.337	537.538	482.795
sp|Q9C0W7|AP2A_SCHPO	apl3	AP-2 complex subunit alpha OS=Schizosaccharomyces pombe (strain 972 / ATCC 24843) GN=apl3 PE=3 SV=1	892	2	C	111.57	63.1265	66.5244
sp|O13823|IMP4_SCHPO	imp4	U3 small nucleolar ribonucleoprotein protein imp4 OS=Schizosaccharomyces pombe (strain 972 / ATCC 24843) GN=imp4 PE=3 SV=1	560	5	C	456.463	258.172	254.796
sp|O74862|UTP23_SCHPO	utp23	rRNA-processing protein utp23 OS=Schizosaccharomyces pombe (strain 972 / ATCC 24843) GN=utp23 PE=3 SV=1	1015	3	C	338.455	191.385	199.803
sp|Q11004|PPID_SCHPO	wis2	40 kDa peptidyl-prolyl cis-trans isomerase OS=Schizosaccharomyces pombe (strain 972 / ATCC 24843) GN=wis2 PE=2 SV=1	254	3	C	481.318	271.907	631.369
sp|O13917|HPRT_SCHPO	hpt1	Hypoxanthine-guanine phosphoribosyltransferase OS=Schizosaccharomyces pombe (strain 972 / ATCC 24843) GN=hpt1 PE=3 SV=1	1659	2	C	115.538	65.2669	105.379
sp|O43012|DCTD_SCHPO	SPBC2G2.13c	Deoxycytidylate deaminase OS=Schizosaccharomyces pombe (strain 972 / ATCC 24843) GN=SPBC2G2.13c PE=3 SV=2	638	5	C	216.435	122.232	133.302
sp|O14228|PUR4_SCHPO	ade3	Probable phosphoribosylformylglycinamidine synthase OS=Schizosaccharomyces pombe (strain 972 / ATCC 24843) GN=ade3 PE=3 SV=1	578	2	C	131.156	73.95	186.681
sp|P04689|TBA2_SCHPO	tub1	Tubulin alpha-2 chain OS=Schizosaccharomyces pombe (strain 972 / ATCC 24843) GN=tub1 PE=1 SV=2	218	6	C	340.305	191.453	303.79
sp|Q9USN3|UTP13_SCHPO	utp13	Probable U3 small nucleolar RNA-associated protein 13 OS=Schizosaccharomyces pombe (strain 972 / ATCC 24843) GN=utp13 PE=3 SV=3	713	6	C	651.447	365.427	306.785
sp|Q9USM6|CYB52_SCHPO	oca8	Probable cytochrome b5 2 OS=Schizosaccharomyces pombe (strain 972 / ATCC 24843) GN=oca8 PE=3 SV=1	630	3	C	127.12	71.2282	205.915
sp|Q10169|DSK2_SCHPO	dph1	Deubiquitination-protection protein dph1 OS=Schizosaccharomyces pombe (strain 972 / ATCC 24843) GN=dph1 PE=3 SV=1	427	4	C	720.185	403.441	398.672
sp|Q10436|YDE2_SCHPO	SPAC12B10.02c	Uncharacterized protein C12B10.02c OS=Schizosaccharomyces pombe (strain 972 / ATCC 24843) GN=SPAC12B10.02c PE=4 SV=1	1515	2	C	90.9392	50.7637	110.374
sp|O13864|IMB1_SCHPO	kap95	Importin subunit beta-1 OS=Schizosaccharomyces pombe (strain 972 / ATCC 24843) GN=kap95 PE=3 SV=1	0	2	C	78.4973	43.6558	76.612
sp|Q9P3A9|YIL5_SCHPO	SPAC1565.05	Uncharacterized protein C1565.05 OS=Schizosaccharomyces pombe (strain 972 / ATCC 24843) GN=SPAC1565.05 PE=4 SV=1	337	13	C	2073.92	1152.43	1190.63
sp|Q09177|RPAC2_SCHPO	rpc19	DNA-directed RNA polymerases I and III subunit RPAC2 OS=Schizosaccharomyces pombe (strain 972 / ATCC 24843) GN=rpc19 PE=2 SV=1	1142	2	C	75.7006	42.0028	57.0479
sp|O74928|PUR9_SCHPO	ade10	Bifunctional purine biosynthesis protein ade10 OS=Schizosaccharomyces pombe (strain 972 / ATCC 24843) GN=ade10 PE=2 SV=1	717	6	C	227.379	126.091	315.793
sp|O13991|YEG9_SCHPO	SPAC26H5.09c	Uncharacterized oxidoreductase C26H5.09c OS=Schizosaccharomyces pombe (strain 972 / ATCC 24843) GN=SPAC26H5.09c PE=2 SV=3	984	2	C	108.163	59.6216	145.514
sp|O13845|RSD1_SCHPO	rsd1	RNA-binding protein rsd1 OS=Schizosaccharomyces pombe (strain 972 / ATCC 24843) GN=rsd1 PE=1 SV=2	304	3	C	285.964	157.309	125.323
sp|P33075|KAD2_SCHPO	adk1	Adenylate kinase OS=Schizosaccharomyces pombe (strain 972 / ATCC 24843) GN=adk1 PE=1 SV=1	656	4	C	171.207	94.1494	521.734
sp|Q09793|NUP45_SCHPO	nup45	Nucleoporin nup45 OS=Schizosaccharomyces pombe (strain 972 / ATCC 24843) GN=nup45 PE=1 SV=2	1417	2	C	205.996	112.976	151.736
sp|P78750|UTP18_SCHPO	SPBC29A3.06	Probable U3 small nucleolar RNA-associated protein 18 OS=Schizosaccharomyces pombe (strain 972 / ATCC 24843) GN=SPBC29A3.06 PE=2 SV=3	627	9	C	1626.98	891.417	857.652
sp|Q9P4X3|UTP7_SCHPO	utp7	Probable U3 small nucleolar RNA-associated protein 7 OS=Schizosaccharomyces pombe (strain 972 / ATCC 24843) GN=utp7 PE=3 SV=1	1099	7	C	1056.79	578.481	504.249
sp|O14254|IDHP_SCHPO	idp1	Probable isocitrate dehydrogenase [NADP], mitochondrial OS=Schizosaccharomyces pombe (strain 972 / ATCC 24843) GN=idp1 PE=3 SV=2	767	2	C	338.546	184.901	218.521
sp|Q9P7G0|YKY4_SCHPO	SPAC1142.04	Uncharacterized NOC2 family protein C1142.04 OS=Schizosaccharomyces pombe (strain 972 / ATCC 24843) GN=SPAC1142.04 PE=1 SV=1	3	8	C	1017.52	550.834	634.736
sp|Q7Z9I2|YCP9_SCHPO	SPCC663.09c	Uncharacterized oxidoreductase C663.09c OS=Schizosaccharomyces pombe (strain 972 / ATCC 24843) GN=SPCC663.09c PE=3 SV=1	223	3	C	90.8218	48.7666	159.573
sp|Q9HGP5|CAPZB_SCHPO	acp2	F-actin-capping protein subunit beta OS=Schizosaccharomyces pombe (strain 972 / ATCC 24843) GN=acp2 PE=1 SV=1	709	8	C	419.524	225.069	251.34
sp|Q9Y7Y3|YGR4_SCHPO	SPBC365.04c	Uncharacterized RNA-binding protein C365.04c OS=Schizosaccharomyces pombe (strain 972 / ATCC 24843) GN=SPBC365.04c PE=3 SV=1	263	5	C	863.599	463.074	440.873
sp|O60179|UTP10_SCHPO	utp10	U3 small nucleolar RNA-associated protein 10 OS=Schizosaccharomyces pombe (strain 972 / ATCC 24843) GN=utp10 PE=3 SV=1	338	16	C	1599.36	850.192	992.893
sp|O43063|PSB1_SCHPO	pre3	Probable proteasome subunit beta type-1 OS=Schizosaccharomyces pombe (strain 972 / ATCC 24843) GN=pre3 PE=3 SV=1	697	2	C	152.087	80.7118	213.832
sp|Q9P7H0|NHP2_SCHPO	nhp2	H/ACA ribonucleoprotein complex subunit 2 OS=Schizosaccharomyces pombe (strain 972 / ATCC 24843) GN=nhp2 PE=1 SV=1	988	2	C	504.837	265.955	256.949
sp|P41390|PUR1_SCHPO	ade4	Amidophosphoribosyltransferase OS=Schizosaccharomyces pombe (strain 972 / ATCC 24843) GN=ade4 PE=1 SV=1	744	4	C	466.047	244.366	518.046
sp|P09627|PMA1_SCHPO	pma1	Plasma membrane ATPase 1 OS=Schizosaccharomyces pombe (strain 972 / ATCC 24843) GN=pma1 PE=1 SV=1	112	40	C	2759.24	1434.26	2625.99
sp|Q9HDY0|YPT71_SCHPO	ypt71	GTP-binding protein ypt71 OS=Schizosaccharomyces pombe (strain 972 / ATCC 24843) GN=ypt71 PE=3 SV=1	550	2	C	85.5456	44.3099	69.0616
sp|O14295|PLR1_SCHPO	plr1	Pyridoxal reductase OS=Schizosaccharomyces pombe (strain 972 / ATCC 24843) GN=plr1 PE=1 SV=1	272	10	C	356.006	184.048	492.498
sp|Q09864|HSP60_SCHPO	hsp60	Heat shock protein 60, mitochondrial OS=Schizosaccharomyces pombe (strain 972 / ATCC 24843) GN=hsp60 PE=1 SV=1	84	37	C	3895.33	2009.11	3433.64
sp|Q10287|BGS1_SCHPO	bgs1	1,3-beta-glucan synthase component bgs1 OS=Schizosaccharomyces pombe (strain 972 / ATCC 24843) GN=bgs1 PE=1 SV=1	741	2	C	165.142	85.0111	118.538
sp|O14327|PAB2_SCHPO	pab2	Polyadenylate-binding protein 2 OS=Schizosaccharomyces pombe (strain 972 / ATCC 24843) GN=pab2 PE=1 SV=1	425	3	C	110.43	56.824	72.7166
sp|O00087|DLDH_SCHPO	dld1	Dihydrolipoyl dehydrogenase, mitochondrial OS=Schizosaccharomyces pombe (strain 972 / ATCC 24843) GN=dld1 PE=2 SV=2	129	11	C	1678.63	857.447	921.861
sp|Q09878|MET10_SCHPO	SPCC584.01c	Probable sulfite reductase [NADPH] flavoprotein component OS=Schizosaccharomyces pombe (strain 972 / ATCC 24843) GN=SPCC584.01c PE=3 SV=2	104	17	C	823.999	419.829	1004.66
sp|P78871|RST2_SCHPO	rst2	Zinc finger protein rst2 OS=Schizosaccharomyces pombe (strain 972 / ATCC 24843) GN=rst2 PE=2 SV=2	1418	3	C	186.574	94.8951	69.6462
sp|Q9URX9|PXR1_SCHPO	pxr1	Protein pxr1 OS=Schizosaccharomyces pombe (strain 972 / ATCC 24843) GN=pxr1 PE=1 SV=1	653	2	C	857.137	431.59	252.313
sp|O36032|GLRX1_SCHPO	grx1	Glutaredoxin-1 OS=Schizosaccharomyces pombe (strain 972 / ATCC 24843) GN=grx1 PE=3 SV=1	494	4	C	285.461	143.479	415.852
sp|O94307|PFD5_SCHPO	bob1	Probable prefoldin subunit 5 OS=Schizosaccharomyces pombe (strain 972 / ATCC 24843) GN=bob1 PE=1 SV=1	573	3	C	81.8835	40.7522	110.022
sp|O94709|ODPX_SCHPO	SPCC1259.09c	Probable pyruvate dehydrogenase protein X component, mitochondrial OS=Schizosaccharomyces pombe (strain 972 / ATCC 24843) GN=SPCC1259.09c PE=2 SV=1	669	5	C	480.207	236.503	249.179
sp|O94255|CAN_SCHPO	SPBP8B7.05c	Carbonic anhydrase OS=Schizosaccharomyces pombe (strain 972 / ATCC 24843) GN=SPBP8B7.05c PE=1 SV=2	845	3	C	92.8953	45.6777	131.732
sp|O14053|UTP21_SCHPO	SPCC1672.07	U3 small nucleolar RNA-associated protein 21 homolog OS=Schizosaccharomyces pombe (strain 972 / ATCC 24843) GN=SPCC1672.07 PE=3 SV=1	802	8	C	1208.31	585.571	578.52
sp|O74787|CHO2_SCHPO	cho2	Phosphatidylethanolamine N-methyltransferase OS=Schizosaccharomyces pombe (strain 972 / ATCC 24843) GN=cho2 PE=1 SV=1	408	2	C	282.414	135.95	152.178
sp|O14007|CBF5_SCHPO	cbf5	H/ACA ribonucleoprotein complex subunit 4 OS=Schizosaccharomyces pombe (strain 972 / ATCC 24843) GN=cbf5 PE=3 SV=1	1276	12	C	3062.71	1469.32	1393.23
sp|O13878|UTP17_SCHPO	utp17	U3 small nucleolar RNA-associated protein 17 OS=Schizosaccharomyces pombe (strain 972 / ATCC 24843) GN=utp17 PE=3 SV=3	305	5	C	903.097	433.019	464.89
sp|O60161|UTP4_SCHPO	utp4	U3 small nucleolar RNA-associated protein 4 OS=Schizosaccharomyces pombe (strain 972 / ATCC 24843) GN=utp4 PE=3 SV=1	507	3	C	306.861	146.857	168.609
sp|O94399|TWF1_SCHPO	twf1	Twinfilin OS=Schizosaccharomyces pombe (strain 972 / ATCC 24843) GN=twf1 PE=1 SV=1	153	7	C	353.227	168.319	213.86
sp|Q11118|WOS2_SCHPO	wos2	Protein wos2 OS=Schizosaccharomyces pombe (strain 972 / ATCC 24843) GN=wos2 PE=2 SV=1	993	2	C	239.063	111.532	362.372
sp|O13940|GLY1_SCHPO	gly1	Probable low-specificity L-threonine aldolase OS=Schizosaccharomyces pombe (strain 972 / ATCC 24843) GN=gly1 PE=3 SV=1	1162	6	C	298.931	138.459	217.444
sp|Q10489|ODPA_SCHPO	pda1	Pyruvate dehydrogenase E1 component subunit alpha, mitochondrial OS=Schizosaccharomyces pombe (strain 972 / ATCC 24843) GN=pda1 PE=1 SV=1	788	18	C	3414.92	1581.62	1492.14
sp|Q09171|ODPB_SCHPO	pdb1	Pyruvate dehydrogenase E1 component subunit beta, mitochondrial OS=Schizosaccharomyces pombe (strain 972 / ATCC 24843) GN=pdb1 PE=4 SV=1	35	6	C	2071.45	957.542	820.44
sp|Q9UUN5|PRA1_SCHPO	SPCC306.02c	PRA1-like protein OS=Schizosaccharomyces pombe (strain 972 / ATCC 24843) GN=SPCC306.02c PE=2 SV=1	495	2	C	81.343	37.4192	141.345
sp|Q92375|TRXB_SCHPO	trr1	Thioredoxin reductase OS=Schizosaccharomyces pombe (strain 972 / ATCC 24843) GN=trr1 PE=1 SV=1	1101	7	C	159.813	73.3452	350.944
sp|Q10161|CLH_SCHPO	chc1	Probable clathrin heavy chain OS=Schizosaccharomyces pombe (strain 972 / ATCC 24843) GN=chc1 PE=1 SV=1	94	38	C	2483.63	1138.73	1489.1
sp|Q09822|CDC15_SCHPO	cdc15	Cell division control protein 15 OS=Schizosaccharomyces pombe (strain 972 / ATCC 24843) GN=cdc15 PE=1 SV=2	472	4	C	259.034	118.068	176.987
sp|O43050|ERG26_SCHPO	erg26	Sterol-4-alpha-carboxylate 3-dehydrogenase, decarboxylating OS=Schizosaccharomyces pombe (strain 972 / ATCC 24843) GN=erg26 PE=3 SV=1	1257	2	C	263.274	119.774	225.89
sp|Q06975|GAR1_SCHPO	gar1	H/ACA ribonucleoprotein complex subunit 1 OS=Schizosaccharomyces pombe (strain 972 / ATCC 24843) GN=gar1 PE=2 SV=1	1268	6	C	1196.72	537.378	542.329
sp|Q02088|TPM_SCHPO	cdc8	Tropomyosin OS=Schizosaccharomyces pombe (strain 972 / ATCC 24843) GN=cdc8 PE=3 SV=1	165	4	C	660.791	295.563	600.475
sp|O59804|CH10_SCHPO	hsp10	10 kDa heat shock protein, mitochondrial OS=Schizosaccharomyces pombe (strain 972 / ATCC 24843) GN=hsp10 PE=1 SV=1	1378	3	C	237.801	106.194	490.037
sp|O59816|ODP2_SCHPO	lat1	Dihydrolipoyllysine-residue acetyltransferase component of pyruvate dehydrogenase complex, mitochondrial OS=Schizosaccharomyces pombe (strain 972 / ATCC 24843) GN=lat1 PE=3 SV=1	48	14	C	1924.29	855.515	809.532
sp|O94413|KPR2_SCHPO	SPCC1620.06c	Ribose-phosphate pyrophosphokinase 2 OS=Schizosaccharomyces pombe (strain 972 / ATCC 24843) GN=SPCC1620.06c PE=1 SV=1	602	5	C	681.041	302.481	706.057
sp|Q9P6L5|SLA2_SCHPO	end4	Endocytosis protein end4 OS=Schizosaccharomyces pombe (strain 972 / ATCC 24843) GN=end4 PE=1 SV=2	73	25	C	1734.71	770.09	971.681
sp|O74472|MUG33_SCHPO	mug33	Meiotically up-regulated gene 33 protein OS=Schizosaccharomyces pombe (strain 972 / ATCC 24843) GN=mug33 PE=1 SV=1	563	3	C	225.983	99.9842	113.995
sp|P41891|GAR2_SCHPO	gar2	Protein gar2 OS=Schizosaccharomyces pombe (strain 972 / ATCC 24843) GN=gar2 PE=1 SV=2	156	11	C	1389.24	612.232	515.772
sp|P35551|FBRL_SCHPO	fib1	rRNA 2'-O-methyltransferase fibrillarin OS=Schizosaccharomyces pombe (strain 972 / ATCC 24843) GN=fib1 PE=1 SV=1	750	12	C	3601.7	1571.61	1602.12
sp|Q9URW6|YIE2_SCHPO	SPAPJ696.02	SH3 domain-containing protein PJ696.02 OS=Schizosaccharomyces pombe (strain 972 / ATCC 24843) GN=SPAPJ696.02 PE=1 SV=1	83	8	C	926.01	402.83	405.608
sp|O94514|NOP56_SCHPO	nop56	Nucleolar protein 56 OS=Schizosaccharomyces pombe (strain 972 / ATCC 24843) GN=nop56 PE=3 SV=1	398	24	C	5153.1	2237.28	2083.55
sp|O94657|XDJ1_SCHPO	xdj1	DnaJ protein homolog xdj1 OS=Schizosaccharomyces pombe (strain 972 / ATCC 24843) GN=xdj1 PE=3 SV=1	686	2	C	51.9889	21.5375	34.705
sp|P87167|BUT2_SCHPO	but2	Uba3-binding protein but2 OS=Schizosaccharomyces pombe (strain 972 / ATCC 24843) GN=but2 PE=1 SV=1	1296	4	C	295.206	122.117	292.711
sp|O59681|YBS1_SCHPO	SPBC18E5.01	Uncharacterized protein C18E5.01 OS=Schizosaccharomyces pombe (strain 972 / ATCC 24843) GN=SPBC18E5.01 PE=3 SV=1	1126	3	C	120.842	49.6426	59.9476
sp|Q9P7S7|NOP58_SCHPO	nop58	Nucleolar protein 58 OS=Schizosaccharomyces pombe (strain 972 / ATCC 24843) GN=nop58 PE=1 SV=1	489	15	C	2863.5	1161.11	1077.87
sp|O74690|SNU13_SCHPO	snu13	13 kDa ribonucleoprotein-associated protein OS=Schizosaccharomyces pombe (strain 972 / ATCC 24843) GN=snu13 PE=3 SV=1	1534	3	C	647.002	257.042	171.871
sp|Q9C0Y6|YKM8_SCHPO	SPAPB24D3.08c	Zinc-type alcohol dehydrogenase-like protein PB24D3.08c OS=Schizosaccharomyces pombe (strain 972 / ATCC 24843) GN=SPAPB24D3.08c PE=3 SV=1	235	4	C	77.3212	29.3364	130.168
sp|Q10316|ARPC5_SCHPO	arc5	Actin-related protein 2/3 complex subunit 5 OS=Schizosaccharomyces pombe (strain 972 / ATCC 24843) GN=arc5 PE=1 SV=1	10	2	C	51.0328	19.1519	37.6557
sp|O13736|SLA1_SCHPO	sla1	Actin cytoskeleton-regulatory complex protein sla1 OS=Schizosaccharomyces pombe (strain 972 / ATCC 24843) GN=sla1 PE=1 SV=1	367	42	C	4548.14	1635.74	1157.11
sp|Q9USP6|CLC1_SCHPO	clc1	Clathrin light chain OS=Schizosaccharomyces pombe (strain 972 / ATCC 24843) GN=clc1 PE=1 SV=1	290	6	C	378.37	135.27	170.02
sp|Q4LB35|FOL1_SCHPO	fol1	Folic acid synthesis protein fol1 OS=Schizosaccharomyces pombe (strain 972 / ATCC 24843) GN=fol1 PE=1 SV=2	965	4	C	389.247	138.245	154.698
sp|Q09676|YA03_SCHPO	SPAC5H10.03	Probable phosphatase SPAC5H10.03 OS=Schizosaccharomyces pombe (strain 972 / ATCC 24843) GN=SPAC5H10.03 PE=3 SV=1	9	2	C	44.4503	15.7563	151.422
sp|P87171|KPR5_SCHPO	SPBC3D6.06c	Ribose-phosphate pyrophosphokinase 5 OS=Schizosaccharomyces pombe (strain 972 / ATCC 24843) GN=SPBC3D6.06c PE=3 SV=1	534	6	C	645.76	219.366	528.196
sp|O74423|ENT1_SCHPO	ent1	Epsin-1 OS=Schizosaccharomyces pombe (strain 972 / ATCC 24843) GN=ent1 PE=1 SV=1	478	17	C	1059.59	335.826	304.544
sp|O74989|YJZC_SCHPO	SPCC338.12	Uncharacterized protein C338.12 OS=Schizosaccharomyces pombe (strain 972 / ATCC 24843) GN=SPCC338.12 PE=3 SV=1	822	3	C	628.642	197.165	307.159
sp|Q9P785|YNY5_SCHPO	SPBC1711.05	LisH domain-containing protein C1711.05 OS=Schizosaccharomyces pombe (strain 972 / ATCC 24843) GN=SPBC1711.05 PE=3 SV=1	780	3	C	758.079	235.911	213.045
sp|O13849|CBPY_SCHPO	cpy1	Carboxypeptidase Y OS=Schizosaccharomyces pombe (strain 972 / ATCC 24843) GN=cpy1 PE=1 SV=1	202	8	C	2408.01	726.875	817.889
sp|Q9HFE4|FMO1_SCHPO	fmo1	Thiol-specific monooxygenase OS=Schizosaccharomyces pombe (strain 972 / ATCC 24843) GN=fmo1 PE=1 SV=1	634	3	C	61.84	17.9509	80.3441
sp|Q10172|PAN1_SCHPO	pan1	Actin cytoskeleton-regulatory complex protein pan1 OS=Schizosaccharomyces pombe (strain 972 / ATCC 24843) GN=pan1 PE=1 SV=1	41	3	C	191.453	54.1272	74.7895
sp|O74901|YCS1_SCHPO	SPCC613.01	Uncharacterized protein CC613.01 OS=Schizosaccharomyces pombe (strain 972 / ATCC 24843) GN=SPCC613.01 PE=1 SV=1	1617	2	C	105.859	29.7273	35.7573
sp|Q9HGL2|YHLA_SCHPO	SPBC800.10c	Uncharacterized calcium-binding protein C800.10c OS=Schizosaccharomyces pombe (strain 972 / ATCC 24843) GN=SPBC800.10c PE=3 SV=1	525	5	C	467.605	122.846	163.498
sp|O74960|PIL1_SCHPO	pil1	Probable sphingolipid long chain base-responsive protein pil1 OS=Schizosaccharomyces pombe (strain 972 / ATCC 24843) GN=pil1 PE=1 SV=1	473	16	C	1708.69	444.979	756.311
sp|Q09196|MLR4_SCHPO	cdc4	Myosin regulatory light chain cdc4 OS=Schizosaccharomyces pombe (strain 972 / ATCC 24843) GN=cdc4 PE=1 SV=1	1177	3	C	1644.04	426.218	496.217
sp|Q9UU85|PPK38_SCHPO	ppk38	Protein kinase domain-containing protein ppk38 OS=Schizosaccharomyces pombe (strain 972 / ATCC 24843) GN=ppk38 PE=3 SV=1	586	4	C	325.089	80.3498	63.3534
sp|Q9Y7P0|RISA_SCHPO	rib5	Riboflavin synthase OS=Schizosaccharomyces pombe (strain 972 / ATCC 24843) GN=rib5 PE=1 SV=1	231	5	C	474.315	115.522	75.8521
sp|Q9USZ7|END3_SCHPO	end3	Actin cytoskeleton-regulatory complex protein end3 OS=Schizosaccharomyces pombe (strain 972 / ATCC 24843) GN=end3 PE=3 SV=1	682	2	C	183.847	44.2744	80.5104
sp|Q9USI6|MYO2_SCHPO	myo2	Myosin type-2 heavy chain 1 OS=Schizosaccharomyces pombe (strain 972 / ATCC 24843) GN=myo2 PE=1 SV=1	1464	3	C	380.038	83.4363	95.6379
sp|Q10434|CAPZA_SCHPO	acp1	F-actin-capping protein subunit alpha OS=Schizosaccharomyces pombe (strain 972 / ATCC 24843) GN=acp1 PE=1 SV=1	1035	7	C	467.927	102.007	175.331
sp|O59945|FIMB_SCHPO	fim1	Fimbrin OS=Schizosaccharomyces pombe (strain 972 / ATCC 24843) GN=fim1 PE=1 SV=1	159	15	C	1213.08	257.139	549.518
sp|Q9UT50|YFR3_SCHPO	SPAC821.03c	Uncharacterized protein C821.03c OS=Schizosaccharomyces pombe (strain 972 / ATCC 24843) GN=SPAC821.03c PE=1 SV=1	554	11	C	2912.61	615.513	607.511
sp|P10989|ACT_SCHPO	act1	Actin OS=Schizosaccharomyces pombe (strain 972 / ATCC 24843) GN=act1 PE=1 SV=1	236	89	C	10283	1947.32	2025.7
sp|P78929|COFI_SCHPO	cof1	Cofilin OS=Schizosaccharomyces pombe (strain 972 / ATCC 24843) GN=cof1 PE=1 SV=1	215	8	C	1179.11	222.288	516.462
sp|Q9Y7Z8|MYO1_SCHPO	myo1	Myosin-1 OS=Schizosaccharomyces pombe (strain 972 / ATCC 24843) GN=myo1 PE=1 SV=1	71	44	C	4909.27	903.919	975.63
sp|Q9HDX7|YK1D_SCHPO	SPAPB1A10.13	Uncharacterized protein PB1A10.13 OS=Schizosaccharomyces pombe (strain 972 / ATCC 24843) GN=SPAPB1A10.13 PE=1 SV=1	1036	3	C	695.245	121.503	190.134
sp|Q9USH7|PSY1_SCHPO	psy1	Syntaxin-like protein psy1 OS=Schizosaccharomyces pombe (strain 972 / ATCC 24843) GN=psy1 PE=3 SV=1	540	5	C	1374.96	238.312	438.775
sp|O74333|NCE2_SCHPO	fhn1	Non-classical export protein 2 homolog OS=Schizosaccharomyces pombe (strain 972 / ATCC 24843) GN=fhn1 PE=3 SV=1	1222	2	C	385.582	62.0927	112.162
sp|P78963|SKB1_SCHPO	skb1	Protein arginine N-methyltransferase skb1 OS=Schizosaccharomyces pombe (strain 972 / ATCC 24843) GN=skb1 PE=1 SV=2	597	20	C	5588.39	775.361	1064.55
sp|O14008|CAM2_SCHPO	cam2	Myosin 1 light chain cam2 OS=Schizosaccharomyces pombe (strain 972 / ATCC 24843) GN=cam2 PE=1 SV=1	687	11	C	1380.26	165.95	200.052
sp|O14157|MYO3_SCHPO	myo3	Myosin type-2 heavy chain 2 OS=Schizosaccharomyces pombe (strain 972 / ATCC 24843) GN=myo3 PE=1 SV=1	604	10	C	4937.73	574.394	470.724
sp|Q9UUG5|MLR1_SCHPO	rlc1	Myosin regulatory light chain 1 OS=Schizosaccharomyces pombe (strain 972 / ATCC 24843) GN=rlc1 PE=1 SV=1	461	2	C	480.865	44.0239	38.0259
sp|O13923|CORO_SCHPO	crn1	Coronin-like protein crn1 OS=Schizosaccharomyces pombe (strain 972 / ATCC 24843) GN=crn1 PE=1 SV=1	596	26	C	4766.36	406.538	382.12
sp|Q92372|RFA1_SCHPO	ssb1	Replication factor A protein 1 OS=Schizosaccharomyces pombe (strain 972 / ATCC 24843) GN=ssb1 PE=1 SV=1	131	16	C	13210.1	688.705	811.332
sp|O14087|RIM1_SCHPO	rim1	Single-stranded DNA-binding protein rim1, mitochondrial OS=Schizosaccharomyces pombe (strain 972 / ATCC 24843) GN=rim1 PE=2 SV=2	838	3	C	2049.97	99.4501	86.0679
sp|P36592|RAD22_SCHPO	rad22	DNA repair and recombination protein rad22 OS=Schizosaccharomyces pombe (strain 972 / ATCC 24843) GN=rad22 PE=1 SV=2	18	4	C	3729.28	158.99	166.844
sp|Q92373|RFA2_SCHPO	ssb2	Replication factor A protein 2 OS=Schizosaccharomyces pombe (strain 972 / ATCC 24843) GN=ssb2 PE=1 SV=1	1271	3	C	858.273	30.0166	29.1515
						318.365
